# Supplementary material
Source: PubMed Central journal article supplement (PMC5358517)
Supplement: NIHMS853038-supplement-supplemental.pdf [file NIHMS853038-supplement-supplemental.pdf]

## SUPPORTING INFORMATION

**Dynamics and the Regiochemistry of Nitration of Toluene**

Yexenia Nieves-Quinones and Daniel A. Singleton\*

*Department of Chemistry, Texas A&M University, 3255 TAMU,  
College Station, Texas 77843, United States*[singleton@chem.tamu.edu](mailto:singleton@chem.tamu.edu)

|                                                                                                                         |    |
|-------------------------------------------------------------------------------------------------------------------------|----|
| Experimental Procedures .....                                                                                           | 8  |
| Reaction Procedures for Nitration of Toluene: .....                                                                     | 8  |
| Product Ratio Determination .....                                                                                       | 9  |
| Computational Procedures and Supporting Computational Results .....                                                     | 10 |
| General .....                                                                                                           | 10 |
| Additional Comments on the ONIOM Model and the Conditions for Simulations.....                                          | 11 |
| Initialization of Trajectories and Additional Details on Trajectories .....                                             | 11 |
| PMF Trajectory Initialization, PMF in a Solvent Cube, and Extended Data .....                                           | 12 |
| Product-Forming Trajectories for the Full Model .....                                                                   | 14 |
| Product-Forming Trajectories using $\text{NO}_2^+\text{BF}_4^-$ in Implicit Solvent.....                                | 16 |
| Product-Forming Trajectories using $\text{NO}_2^+$ in Implicit Solvent.....                                             | 17 |
| Product-Forming Trajectories using $\text{NO}_2^+$ in Explicit $\text{CH}_2\text{Cl}_2$ .....                           | 17 |
| Monte Carlo Starting Points, Equilibration, and Extended Data.....                                                      | 18 |
| The Interlocking Sphere Biasing Potential.....                                                                          | 19 |
| Additional Discussion of the Meaning of the Figure 1 PMF Curves .....                                                   | 20 |
| Additional Plots of Trajectories, Comments .....                                                                        | 22 |
| Full Model (Explicit Solvent, $\text{NO}_2^+\text{BF}_4^-$ ).....                                                       | 22 |
| $\text{NO}_2^+\text{BF}_4^-$ in a PCM Model .....                                                                       | 24 |
| $\text{NO}_2^+$ with no counterion in Explicit Solvent .....                                                            | 27 |
| Results and Selectivity Predictions for Trajectories based on Conventional Transition                                   |    |
| Structures .....                                                                                                        | 28 |
| Trajectories for Toluene / $\text{NO}_2^+$ M06-2X/6-311G*/PCM ( $\text{CH}_2\text{Cl}_2$ ) .....                        | 28 |
| Trajectories for Toluene / $\text{NO}_2^+\text{BF}_4^-$ M06-2X/6-311G*/PCM ( $\text{CH}_2\text{Cl}_2$ ).....            | 29 |
| Trajectories for Toluene / $\text{NO}_2^+\text{BF}_4^-$ ONIOM(M06-2X/6-311G*:PM3)/PCM ( $\text{CH}_2\text{Cl}_2$ )..... | 31 |
| Trajectories for Toluene / $\text{NO}_2^+$ / $\text{H}_2\text{SO}_4$ M06-2X/6-311G*/PCM ( $\epsilon=109$ ) .....        | 34 |
| Programs for Calculations .....                                                                                         | 38 |
| Program Suite PROGDYN.....                                                                                              | 38 |
| Program progdynstarterHP .....                                                                                          | 39 |
| Program proggenHP .....                                                                                                 | 45 |
| Program prog1stpoint .....                                                                                              | 54 |
| Program prog2ndpoint.....                                                                                               | 57 |
| Program progdynb .....                                                                                                  | 62 |
| Program progcfour.....                                                                                                  | 70 |
| Program randgen.c.....                                                                                                  | 70 |
| Program proganal when collecting PMF data .....                                                                         | 71 |
| Program proganal when running product-forming trajectories .....                                                        | 73 |
| progdyn.conf for running product-forming trajectories after the release of constraints .....                            | 76 |

|                                                                                                                                             |     |
|---------------------------------------------------------------------------------------------------------------------------------------------|-----|
| progdyn.conf for molecular dynamics generation of the PMF.....                                                                              | 79  |
| progdyn.conf for quasiclassical trajectories started from a toluene / NO <sub>2</sub> <sup>+</sup> BF <sub>4</sub> <sup>-</sup> PCM TS..... | 82  |
| progdynsam .....                                                                                                                            | 83  |
| Program progwhere .....                                                                                                                     | 85  |
| Program whamnit .....                                                                                                                       | 86  |
| Program progseries .....                                                                                                                    | 86  |
| Program prog3dpath .....                                                                                                                    | 88  |
| Program nitrationPara1.m.....                                                                                                               | 89  |
| Program Suite PROGMC .....                                                                                                                  | 91  |
| Program progMC .....                                                                                                                        | 92  |
| Program progmcB .....                                                                                                                       | 94  |
| Program progEcheck .....                                                                                                                    | 100 |
| Program proganal .....                                                                                                                      | 104 |
| Program progmc.conf .....                                                                                                                   | 110 |
| Program whamnitmc .....                                                                                                                     | 113 |
| Program progseriesmc .....                                                                                                                  | 113 |
| Computational Methods Evaluation Studies .....                                                                                              | 115 |
| Benzene proton affinity .....                                                                                                               | 115 |
| Toluene + NO <sub>2</sub> <sup>+</sup> .....                                                                                                | 117 |
| The Energy Surface as NO <sub>2</sub> <sup>+</sup> Approaches Toluene .....                                                                 | 118 |
| The NO <sub>2</sub> <sup>+</sup> - BF <sub>4</sub> Interaction .....                                                                        | 119 |
| Calculated Structures and Complete Energies .....                                                                                           | 124 |
| Guide to Structures, Structure Titles and Their Organization .....                                                                          | 124 |
| Toluene M062X/6-311G*/PCM(CH <sub>2</sub> Cl <sub>2</sub> ) .....                                                                           | 124 |
| NO <sub>2</sub> <sup>+</sup> M062X/6-311G*/PCM(CH <sub>2</sub> Cl <sub>2</sub> ) .....                                                      | 124 |
| TSs for Toluene + NO <sub>2</sub> <sup>+</sup> M062X/6-311G*/PCM(CH <sub>2</sub> Cl <sub>2</sub> ) .....                                    | 125 |
| TS Toluene + NO <sub>2</sub> <sup>+</sup> ipso 190031 .....                                                                                 | 125 |
| TS Toluene + NO <sub>2</sub> <sup>+</sup> ortho 187860.....                                                                                 | 125 |
| TS Toluene + NO <sub>2</sub> <sup>+</sup> ortho 188821 .....                                                                                | 125 |
| TS Toluene + NO <sub>2</sub> <sup>+</sup> para 189331 .....                                                                                 | 126 |
| TS Toluene + NO <sub>2</sub> <sup>+</sup> para 189465 .....                                                                                 | 126 |
| Product Structures for Toluene + NO <sub>2</sub> <sup>+</sup> M062X/6-311G*/PCM(CH <sub>2</sub> Cl <sub>2</sub> ).....                      | 127 |
| ipso Product 206704 .....                                                                                                                   | 127 |
| meta Product 209211 .....                                                                                                                   | 127 |
| ortho Product 212984 .....                                                                                                                  | 127 |
| para Product 218203 .....                                                                                                                   | 128 |
| Pi Complexes for Toluene + NO <sub>2</sub> <sup>+</sup> M062X/6-311G*/PCM(CH <sub>2</sub> Cl <sub>2</sub> ) .....                           | 128 |
| ipso N-Pi complex 191410 .....                                                                                                              | 128 |
| ipso O-Pi complex 186028 .....                                                                                                              | 129 |
| meta N-Pi complex 189935 .....                                                                                                              | 129 |
| meta N-Pi complex 190153 .....                                                                                                              | 129 |
| meta N-Pi complex 190249 .....                                                                                                              | 130 |
| ortho N-Pi complex 189508 .....                                                                                                             | 130 |
| ortho O-Pi complex 187442 .....                                                                                                             | 130 |
| ortho O-Pi complex 187803 .....                                                                                                             | 130 |
| para N-Pi complex 189915 .....                                                                                                              | 131 |

|                                                                                                                                                         |     |
|---------------------------------------------------------------------------------------------------------------------------------------------------------|-----|
| para N-Pi complex 190032 .....                                                                                                                          | 131 |
| para N-Pi complex 190293 .....                                                                                                                          | 131 |
| TS for the migration of NO <sub>2</sub> <sup>+</sup> from <i>ipso</i> to <i>ortho</i> .....                                                             | 132 |
| TSs and CVTSs for Toluene + NO <sub>2</sub> <sup>+</sup> BF <sub>4</sub> <sup>-</sup> ONIOM(M062X/6-311G*:PM3)/PCM(CH <sub>2</sub> Cl <sub>2</sub> ) .. | 132 |
| TS NO2BF4 PCM ONIOM 2.596_94018 .....                                                                                                                   | 132 |
| TS NO2BF4 PCM ONIOM 2.605_94107 .....                                                                                                                   | 133 |
| TS NO2BF4 PCM ONIOM 2.607_93956 .....                                                                                                                   | 133 |
| TS NO2BF4 PCM ONIOM 2.609_93861 .....                                                                                                                   | 134 |
| CVTS NO2BF4 PCM ONIOM 940511 .....                                                                                                                      | 134 |
| CVTS NO2BF4 PCM ONIOM 940237 (6c <sup>‡</sup> ) .....                                                                                                   | 135 |
| TS NO2BF4 PCM ONIOM 2.609_94138 .....                                                                                                                   | 135 |
| TS NO2BF4 PCM ONIOM 2.611_93953 .....                                                                                                                   | 136 |
| TS NO2BF4 PCM ONIOM 2.610_94049 .....                                                                                                                   | 136 |
| TS NO2BF4 PCM ONIOM 2.611_94056 .....                                                                                                                   | 136 |
| TS NO2BF4 PCM ONIOM 2.612_94115 .....                                                                                                                   | 137 |
| TS NO2BF4 PCM ONIOM 2.613_94064 .....                                                                                                                   | 137 |
| TS NO2BF4 PCM ONIOM 2.613_94071 .....                                                                                                                   | 137 |
| TS NO2BF4 PCM ONIOM 2.615_93981 .....                                                                                                                   | 138 |
| TS NO2BF4 PCM ONIOM 2.622_94034 .....                                                                                                                   | 138 |
| TS NO2BF4 PCM ONIOM 2.629_93709 .....                                                                                                                   | 138 |
| TS NO2BF4 PCM ONIOM 2.635_93808 .....                                                                                                                   | 139 |
| TS NO2BF4 PCM ONIOM 2.677_94011 .....                                                                                                                   | 139 |
| TS NO2BF4 PCM ONIOM 2.682_93941 .....                                                                                                                   | 139 |
| TS NO2BF4 PCM ONIOM 2.684_93988 .....                                                                                                                   | 140 |
| TS NO2BF4 PCM ONIOM 2.693_94047 .....                                                                                                                   | 140 |
| TS NO2BF4 PCM ONIOM 2.701_94088 .....                                                                                                                   | 141 |
| TS NO2BF4 PCM ONIOM 2.704_94050 .....                                                                                                                   | 141 |
| TS NO2BF4 PCM ONIOM 2.707_94118 (6b <sup>‡</sup> ) .....                                                                                                | 141 |
| TS NO2BF4 PCM ONIOM 2.712_94072 .....                                                                                                                   | 142 |
| TS NO2BF4 PCM ONIOM 2.742_94075 .....                                                                                                                   | 142 |
| TS NO2BF4 PCM ONIOM 2.776_93985 .....                                                                                                                   | 143 |
| TS NO2BF4 PCM ONIOM 2.967_93897 .....                                                                                                                   | 143 |
| TS NO2BF4 PCM ONIOM 2.998_94196 (6a <sup>‡</sup> ) .....                                                                                                | 143 |
| TS NO2BF4 PCM ONIOM 3.076_93756 .....                                                                                                                   | 144 |
| TS NO2BF4 PCM ONIOM 3.092_93919 .....                                                                                                                   | 144 |
| TS NO2BF4 PCM ONIOM 3.093_93956 .....                                                                                                                   | 144 |
| TS NO2BF4 PCM ONIOM 3.099_93450 .....                                                                                                                   | 145 |
| TS NO2BF4 PCM ONIOM 3.107_93658 .....                                                                                                                   | 145 |
| TS NO2BF4 PCM ONIOM 3.119_93855 .....                                                                                                                   | 145 |
| TS NO2BF4 PCM ONIOM 3.119_93935 .....                                                                                                                   | 146 |
| TS NO2BF4 PCM ONIOM 3.125_93949 .....                                                                                                                   | 146 |
| TS NO2BF4 PCM ONIOM 3.130_93945 .....                                                                                                                   | 146 |
| TS NO2BF4 PCM ONIOM 3.138_94010 .....                                                                                                                   | 147 |
| TS NO2BF4 PCM ONIOM 3.139_93772 .....                                                                                                                   | 147 |
| TS NO2BF4 PCM ONIOM 3.146_93865 .....                                                                                                                   | 148 |
| TS NO2BF4 PCM ONIOM 3.182_93693 .....                                                                                                                   | 148 |

|                                                                                                                                                          |     |
|----------------------------------------------------------------------------------------------------------------------------------------------------------|-----|
| TS NO2BF4 PCM ONIOM 3.341_93662.....                                                                                                                     | 148 |
| Pi Complexes for Toluene / NO <sub>2</sub> <sup>+</sup> BF <sub>4</sub> <sup>-</sup> ONIOM(M062X/6-311G*:PM3)/PCM(CH <sub>2</sub> Cl <sub>2</sub> )..... | 149 |
| Pi Complex NO2BF4 PCM ONIOM 2.727_94123 .....                                                                                                            | 149 |
| Pi Complex NO2BF4 PCM ONIOM 2.731_94156 .....                                                                                                            | 149 |
| Pi Complex NO2BF4 PCM ONIOM 2.750_94123 .....                                                                                                            | 150 |
| Pi Complex NO2BF4 PCM ONIOM 2.750_94145 .....                                                                                                            | 150 |
| Pi Complex NO2BF4 PCM ONIOM 2.754_94188 .....                                                                                                            | 150 |
| Pi Complex NO2BF4 PCM ONIOM 2.763_94064 .....                                                                                                            | 151 |
| Pi Complex NO2BF4 PCM ONIOM 2.765_93840 .....                                                                                                            | 151 |
| Pi Complex NO2BF4 PCM ONIOM 2.768_94165 .....                                                                                                            | 151 |
| Pi Complex NO2BF4 PCM ONIOM 2.770_94103 .....                                                                                                            | 152 |
| Pi Complex NO2BF4 PCM ONIOM 2.782_93989 .....                                                                                                            | 152 |
| Pi Complex NO2BF4 PCM ONIOM 2.788_93809 .....                                                                                                            | 152 |
| Pi Complex NO2BF4 PCM ONIOM 2.789_94125 .....                                                                                                            | 153 |
| Pi Complex NO2BF4 PCM ONIOM 2.795_93851 .....                                                                                                            | 153 |
| Pi Complex NO2BF4 PCM ONIOM 2.805_94148 .....                                                                                                            | 153 |
| Pi Complex NO2BF4 PCM ONIOM 2.807_94201 .....                                                                                                            | 154 |
| Pi Complex NO2BF4 PCM ONIOM 2.813_93970 .....                                                                                                            | 154 |
| Pi Complex NO2BF4 PCM ONIOM 2.815_94069 .....                                                                                                            | 155 |
| Pi Complex NO2BF4 PCM ONIOM 2.816_94015 .....                                                                                                            | 155 |
| Pi Complex NO2BF4 PCM ONIOM 2.817_94021 .....                                                                                                            | 155 |
| Pi Complex NO2BF4 PCM ONIOM 2.819_94022 .....                                                                                                            | 156 |
| Pi Complex NO2BF4 PCM ONIOM 2.820_94089 .....                                                                                                            | 156 |
| Pi Complex NO2BF4 PCM ONIOM 2.822_94104 .....                                                                                                            | 157 |
| Pi Complex NO2BF4 PCM ONIOM 2.822_94188 .....                                                                                                            | 157 |
| Pi Complex NO2BF4 PCM ONIOM 2.823_94179 .....                                                                                                            | 157 |
| Pi Complex NO2BF4 PCM ONIOM 2.825_94068 .....                                                                                                            | 158 |
| Pi Complex NO2BF4 PCM ONIOM 2.826_94040 .....                                                                                                            | 158 |
| Pi Complex NO2BF4 PCM ONIOM 2.829_94116 .....                                                                                                            | 158 |
| Pi Complex NO2BF4 PCM ONIOM 2.830_93763 .....                                                                                                            | 159 |
| Pi Complex NO2BF4 PCM ONIOM 2.830_94055 .....                                                                                                            | 159 |
| Pi Complex NO2BF4 PCM ONIOM 2.830_94126 .....                                                                                                            | 159 |
| Pi Complex NO2BF4 PCM ONIOM 2.830_94144 .....                                                                                                            | 160 |
| Pi Complex NO2BF4 PCM ONIOM 2.831_93989 .....                                                                                                            | 160 |
| Pi Complex NO2BF4 PCM ONIOM 2.832_93961 .....                                                                                                            | 160 |
| Pi Complex NO2BF4 PCM ONIOM 2.832_94166 .....                                                                                                            | 161 |
| Pi Complex NO2BF4 PCM ONIOM 2.833_94062 .....                                                                                                            | 161 |
| Pi Complex NO2BF4 PCM ONIOM 2.834_93928 .....                                                                                                            | 162 |
| Pi Complex NO2BF4 PCM ONIOM 2.835_94109 .....                                                                                                            | 162 |
| Pi Complex NO2BF4 PCM ONIOM 2.838_93889 .....                                                                                                            | 162 |
| Pi Complex NO2BF4 PCM ONIOM 2.839_94082 .....                                                                                                            | 163 |
| Pi Complex NO2BF4 PCM ONIOM 2.839_94167 .....                                                                                                            | 163 |
| Pi Complex NO2BF4 PCM ONIOM 2.841_94092 .....                                                                                                            | 163 |
| Pi Complex NO2BF4 PCM ONIOM 2.843_94060 .....                                                                                                            | 164 |
| Pi Complex NO2BF4 PCM ONIOM 2.844_94005 .....                                                                                                            | 164 |
| Pi Complex NO2BF4 PCM ONIOM 2.847_94076 .....                                                                                                            | 164 |

|                                               |     |
|-----------------------------------------------|-----|
| Pi Complex NO2BF4 PCM ONIOM 2.852_94057 ..... | 165 |
| Pi Complex NO2BF4 PCM ONIOM 2.852_94125 ..... | 165 |
| Pi Complex NO2BF4 PCM ONIOM 2.854_93769 ..... | 165 |
| Pi Complex NO2BF4 PCM ONIOM 2.857_93993 ..... | 166 |
| Pi Complex NO2BF4 PCM ONIOM 2.858_94149 ..... | 166 |
| Pi Complex NO2BF4 PCM ONIOM 2.866_94198 ..... | 167 |
| Pi Complex NO2BF4 PCM ONIOM 2.868_93751 ..... | 167 |
| Pi Complex NO2BF4 PCM ONIOM 2.870_93870 ..... | 167 |
| Pi Complex NO2BF4 PCM ONIOM 2.875_94070 ..... | 168 |
| Pi Complex NO2BF4 PCM ONIOM 2.877_93769 ..... | 168 |
| Pi Complex NO2BF4 PCM ONIOM 2.879_94110 ..... | 168 |
| Pi Complex NO2BF4 PCM ONIOM 2.889_93857 ..... | 169 |
| Pi Complex NO2BF4 PCM ONIOM 2.894_93761 ..... | 169 |
| Pi Complex NO2BF4 PCM ONIOM 3.045_94107 ..... | 170 |
| Pi Complex NO2BF4 PCM ONIOM 3.073_94058 ..... | 170 |
| Pi Complex NO2BF4 PCM ONIOM 3.107_93904 ..... | 170 |
| Pi Complex NO2BF4 PCM ONIOM 3.137_94117 ..... | 171 |
| Pi Complex NO2BF4 PCM ONIOM 3.139_94253 ..... | 171 |
| Pi Complex NO2BF4 PCM ONIOM 3.146_94108 ..... | 171 |
| Pi Complex NO2BF4 PCM ONIOM 3.156_94025 ..... | 172 |
| Pi Complex NO2BF4 PCM ONIOM 3.158_94252 ..... | 172 |
| Pi Complex NO2BF4 PCM ONIOM 3.163_93717 ..... | 173 |
| Pi Complex NO2BF4 PCM ONIOM 3.173_93824 ..... | 173 |
| Pi Complex NO2BF4 PCM ONIOM 3.178_94087 ..... | 173 |
| Pi Complex NO2BF4 PCM ONIOM 3.180_94194 ..... | 174 |
| Pi Complex NO2BF4 PCM ONIOM 3.191_93775 ..... | 174 |
| Pi Complex NO2BF4 PCM ONIOM 3.208_93983 ..... | 174 |
| Pi Complex NO2BF4 PCM ONIOM 3.215_94153 ..... | 175 |
| Pi Complex NO2BF4 PCM ONIOM 3.217_93889 ..... | 175 |
| Pi Complex NO2BF4 PCM ONIOM 3.221_94009 ..... | 175 |
| Pi Complex NO2BF4 PCM ONIOM 3.228_94053 ..... | 176 |
| Pi Complex NO2BF4 PCM ONIOM 3.229_94135 ..... | 176 |
| Pi Complex NO2BF4 PCM ONIOM 3.231_94060 ..... | 177 |
| Pi Complex NO2BF4 PCM ONIOM 3.236_93860 ..... | 177 |
| Pi Complex NO2BF4 PCM ONIOM 3.237_93813 ..... | 177 |
| Pi Complex NO2BF4 PCM ONIOM 3.238_93914 ..... | 178 |
| Pi Complex NO2BF4 PCM ONIOM 3.242_93631 ..... | 178 |
| Pi Complex NO2BF4 PCM ONIOM 3.245_94016 ..... | 178 |
| Pi Complex NO2BF4 PCM ONIOM 3.247_94177 ..... | 179 |
| Pi Complex NO2BF4 PCM ONIOM 3.248_93896 ..... | 179 |
| Pi Complex NO2BF4 PCM ONIOM 3.254_94079 ..... | 179 |
| Pi Complex NO2BF4 PCM ONIOM 3.256_93794 ..... | 180 |
| Pi Complex NO2BF4 PCM ONIOM 3.261_94154 ..... | 180 |
| Pi Complex NO2BF4 PCM ONIOM 3.270_93741 ..... | 180 |
| Pi Complex NO2BF4 PCM ONIOM 3.276_94050 ..... | 181 |
| Pi Complex NO2BF4 PCM ONIOM 3.283_94088 ..... | 181 |

|                                                                                                                                       |     |
|---------------------------------------------------------------------------------------------------------------------------------------|-----|
| Pi Complex NO2BF4 PCM ONIOM 3.283_94208 .....                                                                                         | 181 |
| Pi Complex NO2BF4 PCM ONIOM 3.289_93970 .....                                                                                         | 182 |
| Pi Complex NO2BF4 PCM ONIOM 3.296_93743 .....                                                                                         | 182 |
| Pi Complex NO2BF4 PCM ONIOM 3.302_93903 .....                                                                                         | 183 |
| Pi Complex NO2BF4 PCM ONIOM 3.319_94023 .....                                                                                         | 183 |
| Pi Complex NO2BF4 PCM ONIOM 3.330_94112 .....                                                                                         | 183 |
| Pi Complex NO2BF4 PCM ONIOM 3.366_94716 .....                                                                                         | 184 |
| Pi Complex NO2BF4 PCM ONIOM 3.372_94096 .....                                                                                         | 184 |
| Pi Complex NO2BF4 PCM ONIOM 3.382_93727 .....                                                                                         | 184 |
| Pi Complex NO2BF4 PCM ONIOM 3.406_94020 .....                                                                                         | 185 |
| Pi Complex NO2BF4 PCM ONIOM 3.408_94164 .....                                                                                         | 185 |
| TSs for Toluene + NO <sub>2</sub> <sup>+</sup> BF <sub>4</sub> <sup>-</sup> M062X/6-311G*/PCM(CH <sub>2</sub> Cl <sub>2</sub> ) ..... | 186 |
| TS NO2BF4 PCM PURE-M06-2X 3.440_824095 (5a <sup>‡</sup> ) .....                                                                       | 186 |
| TS NO2BF4 PCM PURE-M06-2X 3.4399_824088 .....                                                                                         | 186 |
| TS NO2BF4 PCM PURE-M06-2X 3.440_824085 .....                                                                                          | 186 |
| TS NO2BF4 PCM PURE-M06-2X 3.426_824053 (5b <sup>‡</sup> ) .....                                                                       | 187 |
| TS NO2BF4 PCM PURE-M06-2X 3.393_822143utf00006.....                                                                                   | 187 |
| TS NO2BF4 PCM PURE-M06-2X 3.3794_822005 .....                                                                                         | 188 |
| TS NO2BF4 PCM PURE-M06-2X 3.332_821966 .....                                                                                          | 188 |
| TS NO2BF4 PCM PURE-M06-2X 2.434_821714 .....                                                                                          | 188 |
| TS NO2BF4 PCM PURE-M06-2X 2.429_821508 .....                                                                                          | 189 |
| TS NO2BF4 PCM PURE-M06-2X 2.4410_821447 .....                                                                                         | 189 |
| TS NO2BF4 PCM PURE-M06-2X 2.419_821322utf00003.....                                                                                   | 189 |
| TS NO2BF4 PCM PURE-M06-2X 2.4198_821288 .....                                                                                         | 190 |
| TS NO2BF4 PCM PURE-M06-2X 2.435_821006 .....                                                                                          | 190 |
| TS NO2BF4 PCM PURE-M06-2X 2.424_820983 .....                                                                                          | 191 |
| TS NO2BF4 PCM PURE-M06-2X 2.398_820850 .....                                                                                          | 191 |
| TS NO2BF4 PCM PURE-M06-2X 2.3272_820767 .....                                                                                         | 191 |
| TS NO2BF4 PCM PURE-M06-2X 2.387_820745 .....                                                                                          | 192 |
| TS NO2BF4 PCM PURE-M06-2X 3.444_820739 .....                                                                                          | 192 |
| TS NO2BF4 PCM PURE-M06-2X 3.1392_820578 .....                                                                                         | 192 |
| TS NO2BF4 PCM PURE-M06-2X 3.1409_820572 .....                                                                                         | 193 |
| TS NO2BF4 PCM PURE-M06-2X 3.055_820543 .....                                                                                          | 193 |
| TS NO2BF4 PCM PURE-M06-2X 2.4184_820386 .....                                                                                         | 193 |
| TS NO2BF4 PCM PURE-M06-2X 2.306_820365 .....                                                                                          | 194 |
| TS NO2BF4 PCM PURE-M06-2X 2.2457_820277 .....                                                                                         | 194 |
| TS NO2BF4 PCM PURE-M06-2X 2.386_820166 .....                                                                                          | 194 |
| TS NO2BF4 PCM PURE-M06-2X 3.298_819960 .....                                                                                          | 195 |
| TS NO2BF4 PCM PURE-M06-2X 3.271_819957 .....                                                                                          | 195 |
| TS NO2BF4 PCM PURE-M06-2X 2.6887_819594 .....                                                                                         | 196 |
| TS NO2BF4 PCM PURE-M06-2X 2.586_819521utf00004.....                                                                                   | 196 |
| TS NO2BF4 PCM PURE-M06-2X 2.8006_818867 .....                                                                                         | 196 |
| TS NO2BF4 PCM PURE-M06-2X 2.801_818858 .....                                                                                          | 197 |
| TS NO2BF4 PCM PURE-M06-2X 2.8758_818627 .....                                                                                         | 197 |
| TS NO2BF4 PCM PURE-M06-2X 2.778_818581 .....                                                                                          | 197 |
| TS NO2BF4 PCM PURE-M06-2X 2.840_818475 .....                                                                                          | 198 |

|                                                                                                                                               |     |
|-----------------------------------------------------------------------------------------------------------------------------------------------|-----|
| TS NO <sub>2</sub> BF <sub>4</sub> PCM PURE-M06-2X 3.1393_818379 .....                                                                        | 198 |
| TS NO <sub>2</sub> BF <sub>4</sub> PCM PURE-M06-2X 3.052_818171 .....                                                                         | 198 |
| TS NO <sub>2</sub> BF <sub>4</sub> PCM PURE-M06-2X 2.8774_817851 .....                                                                        | 199 |
| TS NO <sub>2</sub> BF <sub>4</sub> PCM PURE-M06-2X 2.776_817301utf00003.....                                                                  | 199 |
| Pi Complexes for Toluene + NO <sub>2</sub> <sup>+</sup> BF <sub>4</sub> <sup>-</sup> M062X/6-311G*/PCM(CH <sub>2</sub> Cl <sub>2</sub> )..... | 199 |
| Pi Complex NO <sub>2</sub> BF <sub>4</sub> PCM PURE-M06-2X 2.896_825610 .....                                                                 | 199 |
| Pi Complex NO <sub>2</sub> BF <sub>4</sub> PCM PURE-M06-2X 2.910_824610 .....                                                                 | 200 |
| Pi Complex NO <sub>2</sub> BF <sub>4</sub> PCM PURE-M06-2X 2.924_825224 .....                                                                 | 200 |
| Pi Complex NO <sub>2</sub> BF <sub>4</sub> PCM PURE-M06-2X 2.926_823642 .....                                                                 | 201 |
| Pi Complex NO <sub>2</sub> BF <sub>4</sub> PCM PURE-M06-2X 2.926_826511 .....                                                                 | 201 |
| Pi Complex NO <sub>2</sub> BF <sub>4</sub> PCM PURE-M06-2X 2.957_824442 .....                                                                 | 201 |
| Pi Complex NO <sub>2</sub> BF <sub>4</sub> PCM PURE-M06-2X 2.962_827214 .....                                                                 | 202 |
| Pi Complex NO <sub>2</sub> BF <sub>4</sub> PCM PURE-M06-2X 2.967_827913 .....                                                                 | 202 |
| Pi Complex NO <sub>2</sub> BF <sub>4</sub> PCM PURE-M06-2X 2.967_828376 .....                                                                 | 202 |
| Pi Complex NO <sub>2</sub> BF <sub>4</sub> PCM PURE-M06-2X 2.976_825066 .....                                                                 | 203 |
| Pi Complex NO <sub>2</sub> BF <sub>4</sub> PCM PURE-M06-2X 2.984_825092 .....                                                                 | 203 |
| Pi Complex NO <sub>2</sub> BF <sub>4</sub> PCM PURE-M06-2X 2.984_829231 .....                                                                 | 203 |
| Pi Complex NO <sub>2</sub> BF <sub>4</sub> PCM PURE-M06-2X 2.991_828973 .....                                                                 | 204 |
| Pi Complex NO <sub>2</sub> BF <sub>4</sub> PCM PURE-M06-2X 2.998_824734 .....                                                                 | 204 |
| Pi Complex NO <sub>2</sub> BF <sub>4</sub> PCM PURE-M06-2X 2.998_827902 .....                                                                 | 204 |
| Pi Complex NO <sub>2</sub> BF <sub>4</sub> PCM PURE-M06-2X 3.031_827650 .....                                                                 | 205 |
| Pi Complex NO <sub>2</sub> BF <sub>4</sub> PCM PURE-M06-2X 3.038_828111 .....                                                                 | 205 |
| Pi Complex NO <sub>2</sub> BF <sub>4</sub> PCM PURE-M06-2X 3.045_827735 .....                                                                 | 206 |
| Pi Complex NO <sub>2</sub> BF <sub>4</sub> PCM PURE-M06-2X 3.082_828846 .....                                                                 | 206 |
| Pi Complex NO <sub>2</sub> BF <sub>4</sub> PCM PURE-M06-2X 3.181_825313 .....                                                                 | 206 |
| Pi Complex NO <sub>2</sub> BF <sub>4</sub> PCM PURE-M06-2X 3.187_824934 .....                                                                 | 207 |
| Pi Complex NO <sub>2</sub> BF <sub>4</sub> PCM PURE-M06-2X 3.188_825412 .....                                                                 | 207 |
| Pi Complex NO <sub>2</sub> BF <sub>4</sub> PCM PURE-M06-2X 3.189_824858 .....                                                                 | 207 |
| Pi Complex NO <sub>2</sub> BF <sub>4</sub> PCM PURE-M06-2X 3.189_825651 .....                                                                 | 208 |
| Pi Complex NO <sub>2</sub> BF <sub>4</sub> PCM PURE-M06-2X 3.234_824226 .....                                                                 | 208 |
| Pi Complex NO <sub>2</sub> BF <sub>4</sub> PCM PURE-M06-2X 3.278_828463 .....                                                                 | 208 |
| Pi Complex NO <sub>2</sub> BF <sub>4</sub> PCM PURE-M06-2X 3.281_828248 .....                                                                 | 209 |
| Pi Complex NO <sub>2</sub> BF <sub>4</sub> PCM PURE-M06-2X 3.293_826543 .....                                                                 | 209 |
| Pi Complex NO <sub>2</sub> BF <sub>4</sub> PCM PURE-M06-2X 3.351_828876 .....                                                                 | 209 |
| Pi Complex NO <sub>2</sub> BF <sub>4</sub> PCM PURE-M06-2X 3.378_823817 .....                                                                 | 210 |
| Pi Complex NO <sub>2</sub> BF <sub>4</sub> PCM PURE-M06-2X 3.379_825489 .....                                                                 | 210 |
| Pi Complex NO <sub>2</sub> BF <sub>4</sub> PCM PURE-M06-2X 3.423_822985 .....                                                                 | 210 |
| Pi Complex NO <sub>2</sub> BF <sub>4</sub> PCM PURE-M06-2X 3.534_823904 .....                                                                 | 211 |
| Pi Complex NO <sub>2</sub> BF <sub>4</sub> PCM PURE-M06-2X 3.645_825367 .....                                                                 | 211 |
| Pi Complex NO <sub>2</sub> BF <sub>4</sub> PCM PURE-M06-2X 3.689_828697 .....                                                                 | 212 |
| Pi Complex NO <sub>2</sub> BF <sub>4</sub> PCM PURE-M06-2X 3.732_828669 .....                                                                 | 212 |
| Nitrations of Toluene Including a Sulfuric Acid Molecule .....                                                                                | 212 |
| Toluene / NO <sub>2</sub> <sup>+</sup> / H <sub>2</sub> SO <sub>4</sub> TS M06-2X/6-311G*/PCM 3.45_370364.....                                | 212 |
| Toluene / NO <sub>2</sub> <sup>+</sup> / H <sub>2</sub> SO <sub>4</sub> TS M06-2X/6-311G*/PCM 3.42_370300.....                                | 213 |
| Toluene / NO <sub>2</sub> <sup>+</sup> / H <sub>2</sub> SO <sub>4</sub> TS M06-2X/6-311G*/PCM 3.41_370239.....                                | 213 |
| Toluene / NO <sub>2</sub> <sup>+</sup> / H <sub>2</sub> SO <sub>4</sub> TS M06-2X/6-311G*/PCM 3.44_370143.....                                | 213 |

|                                                                                                                |     |
|----------------------------------------------------------------------------------------------------------------|-----|
| Toluene / NO <sub>2</sub> <sup>+</sup> / H <sub>2</sub> SO <sub>4</sub> TS M06-2X/6-311G*/PCM 3.46_370093..... | 214 |
| Toluene / NO <sub>2</sub> <sup>+</sup> / H <sub>2</sub> SO <sub>4</sub> TS M06-2X/6-311G*/PCM 3.43_369922..... | 214 |
| Toluene / NO <sub>2</sub> <sup>+</sup> / H <sub>2</sub> SO <sub>4</sub> TS M06-2X/6-311G*/PCM 3.46_369483..... | 215 |
| Toluene / NO <sub>2</sub> <sup>+</sup> / H <sub>2</sub> SO <sub>4</sub> TS M06-2X/6-311G*/PCM 3.46_369466..... | 215 |
| Toluene / NO <sub>2</sub> <sup>+</sup> / H <sub>2</sub> SO <sub>4</sub> TS M06-2X/6-311G*/PCM 3.41_369431..... | 215 |
| Toluene / NO <sub>2</sub> <sup>+</sup> / H <sub>2</sub> SO <sub>4</sub> TS M06-2X/6-311G*/PCM 2.46_368778..... | 216 |
| Toluene / NO <sub>2</sub> <sup>+</sup> / H <sub>2</sub> SO <sub>4</sub> TS M06-2X/6-311G*/PCM 2.46_368547..... | 216 |
| Toluene / NO <sub>2</sub> <sup>+</sup> / H <sub>2</sub> SO <sub>4</sub> TS M06-2X/6-311G*/PCM 3.45_368434..... | 216 |
| Toluene / NO <sub>2</sub> <sup>+</sup> / H <sub>2</sub> SO <sub>4</sub> TS M06-2X/6-311G*/PCM 2.45_368346..... | 217 |
| Toluene / NO <sub>2</sub> <sup>+</sup> / H <sub>2</sub> SO <sub>4</sub> TS M06-2X/6-311G*/PCM 2.44_368221..... | 217 |
| Toluene / NO <sub>2</sub> <sup>+</sup> / H <sub>2</sub> SO <sub>4</sub> TS M06-2X/6-311G*/PCM 3.42_368199..... | 218 |
| Toluene / NO <sub>2</sub> <sup>+</sup> / H <sub>2</sub> SO <sub>4</sub> TS M06-2X/6-311G*/PCM 2.43_368154..... | 218 |
| Toluene / NO <sub>2</sub> <sup>+</sup> / H <sub>2</sub> SO <sub>4</sub> TS M06-2X/6-311G*/PCM 2.50_368101..... | 218 |
| Toluene / NO <sub>2</sub> <sup>+</sup> / H <sub>2</sub> SO <sub>4</sub> TS M06-2X/6-311G*/PCM 2.45_367948..... | 219 |
| Toluene / NO <sub>2</sub> <sup>+</sup> / H <sub>2</sub> SO <sub>4</sub> TS M06-2X/6-311G*/PCM 3.47_367776..... | 219 |
| Toluene / NO <sub>2</sub> <sup>+</sup> / H <sub>2</sub> SO <sub>4</sub> TS M06-2X/6-311G*/PCM 2.45_367760..... | 219 |
| Toluene / NO <sub>2</sub> <sup>+</sup> / H <sub>2</sub> SO <sub>4</sub> TS M06-2X/6-311G*/PCM 2.47_367357..... | 220 |
| Toluene / NO <sub>2</sub> <sup>+</sup> / H <sub>2</sub> SO <sub>4</sub> TS M06-2X/6-311G*/PCM 2.47_367350..... | 220 |
| Toluene / NO <sub>2</sub> <sup>+</sup> / H <sub>2</sub> SO <sub>4</sub> TS M06-2X/6-311G*/PCM 3.27_367301..... | 221 |
| Toluene / NO <sub>2</sub> <sup>+</sup> / H <sub>2</sub> SO <sub>4</sub> TS M06-2X/6-311G*/PCM 3.08_366987..... | 221 |
| Toluene / NO <sub>2</sub> <sup>+</sup> / H <sub>2</sub> SO <sub>4</sub> TS M06-2X/6-311G*/PCM 3.32_366879..... | 221 |
| Toluene / NO <sub>2</sub> <sup>+</sup> / H <sub>2</sub> SO <sub>4</sub> TS M06-2X/6-311G*/PCM 3.34_366676..... | 222 |
| Toluene / NO <sub>2</sub> <sup>+</sup> / H <sub>2</sub> SO <sub>4</sub> TS M06-2X/6-311G*/PCM 2.48_366653..... | 222 |
| Toluene / NO <sub>2</sub> <sup>+</sup> / H <sub>2</sub> SO <sub>4</sub> TS M06-2X/6-311G*/PCM 3.33_365619..... | 222 |
| Nitrations of Benzene Including a Sulfuric Acid Molecule .....                                                 | 223 |
| Optimized TS for the nitration of benzene / H <sub>2</sub> SO <sub>4</sub> in water.....                       | 223 |
| Optimized TS for the nitration of benzene / H <sub>2</sub> SO <sub>4</sub> with eps=109 .....                  | 223 |
| TS for the nitration of benzene / H <sub>2</sub> SO <sub>4</sub> in water.....                                 | 224 |
| TS for the nitration of benzene / H <sub>2</sub> SO <sub>4</sub> with eps=109 .....                            | 224 |
| π-complex for the nitration of benzene / H <sub>2</sub> SO <sub>4</sub> in water .....                         | 225 |
| π-complex for the nitration of benzene / H <sub>2</sub> SO <sub>4</sub> with eps=109 .....                     | 225 |
| π-complex for the nitration of benzene / H <sub>2</sub> SO <sub>4</sub> in water .....                         | 225 |
| π-complex for the nitration of benzene / H <sub>2</sub> SO <sub>4</sub> with eps=109 .....                     | 226 |
| References .....                                                                                               | 227 |

## Experimental Procedures

### Reaction Procedures for Nitration of Toluene:

Nitration of Toluene using Nitronium Tetrafluoroborate in CH<sub>2</sub>Cl<sub>2</sub>. Example Procedure: To a rapidly stirred mixture of 0.72 g (5.4 mmol) of nitronium tetrafluoroborate in 217 mL of CH<sub>2</sub>Cl<sub>2</sub> was added in one portion a mixture of 4.6 mL (3.99 g, 43.3 mmol) of toluene and 217 mL of CH<sub>2</sub>Cl<sub>2</sub>. The reaction mixture was stirred for 2 h at 25 °C, and the reaction was quenched by addition of 50 mL of water. The aqueous phase was extracted with three 50-mL portions of CH<sub>2</sub>Cl<sub>2</sub>. The combined organic layers were rinsed with 50 mL of brine, dried over anhydrous Na<sub>2</sub>SO<sub>4</sub>, and concentrated under reduced pressure. The residue was then analyzed directly by <sup>1</sup>H NMR. The characteristic peaks for the



products were: *o*-nitrotoluene:  $^1\text{H}$  NMR ( $\text{CDCl}_3$ ):  $\delta$  2.58 (s, 3H), 7.32 (m, 2H), 7.48 (t,  $J=8$  Hz, 1H), 7.94 (d,  $J=8$  Hz, 1H); *m*-nitrotoluene:  $^1\text{H}$  NMR ( $\text{CDCl}_3$ ):  $\delta$  2.42 (s, 3H), 7.38 (t,  $J=7.8$  Hz, 1H), 7.47 (d,  $J=7.8$  Hz, 1H), 7.95 (s, 1H), 7.97 (s, 1H); *p*-nitrotoluene:  $^1\text{H}$  NMR ( $\text{CDCl}_3$ ):  $\delta$  2.44 (s, 3H), 7.29 (d,  $J=8.2$  Hz, 2H), 8.08 (d,  $J=8.2$  Hz, 2H).

Approximately 0.6% of material tentatively identified as 2,4-dinitrotoluene was observed under these conditions. This assignment was made based on characteristic peaks at  $\delta$  8.78 (d,  $J=2.3$  Hz), 8.31 (d of d,  $J=8.5$  and 2.3 Hz), and 7.54 (d, 8.5 Hz).

**Figure S1.** Expansion of the downfield aromatic region of the  $^1\text{H}$  NMR of the product mixture from the nitration of toluene with nitronium tetrafluoroborate.

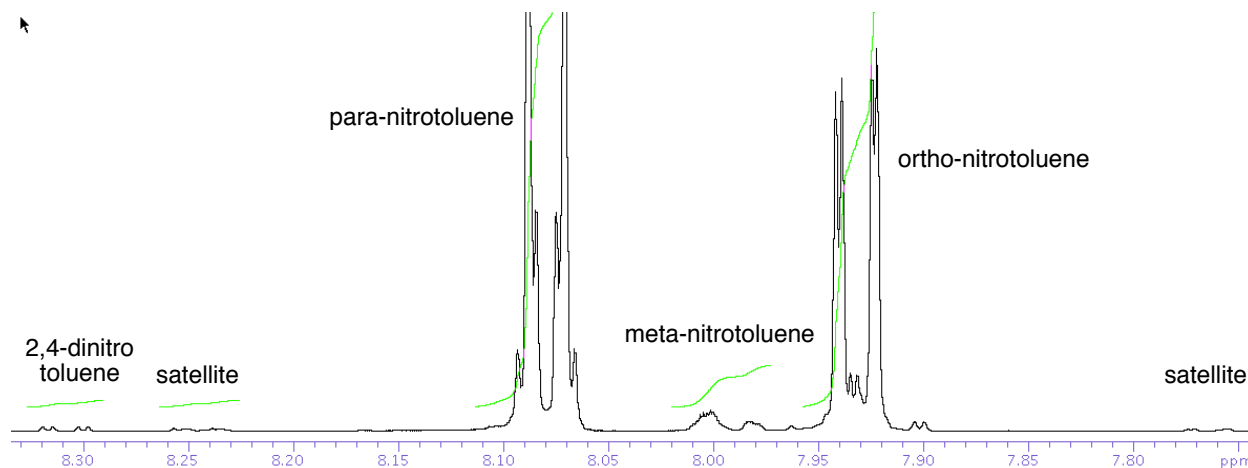

Nitration of Toluene using Nitronium Tetrafluoroborate without Solvent: To 10.0 mL (8.67 g, 94.4 mmol) of toluene was added, in one portion, 0.63 g (4.7 mmol) of nitronium tetrafluoroborate. The resulting mixture was stirred for 1 h at 25 °C. The reaction was quenched by addition of 15 mL of water. The organics were washed with 15 mL of brine and dried over anhydrous  $\text{Na}_2\text{SO}_4$ , then analyzed directly by  $^1\text{H}$  NMR.

### Product Ratio Determination

The product ratios were determined from the crude mixture by  $^1\text{H}$  NMR. The signals used for the product ratio determination were those for the aromatic protons *ortho* to the nitro group in each compound, allowing for the number of hydrogens in the signals integrated. The percentage of each isomer, the average, standard deviation and 95% confidence interval are shown in Table S1.

**Table S1:** Product ratios, average, standard deviation and 95% confidence interval for the nitration of toluene

|                  | Para (%) | Ortho (%) | Meta (%) |
|------------------|----------|-----------|----------|
|                  | 41.05    | 57.03     | 1.93     |
|                  | 41.94    | 56.02     | 2.04     |
|                  | 41.25    | 56.93     | 1.82     |
|                  | 40.64    | 57.08     | 2.28     |
|                  | 40.84    | 57.10     | 2.06     |
|                  | 40.73    | 57.13     | 2.14     |
| <i>Average</i>   | 41.07    | 56.88     | 2.05     |
| <i>Stdve.</i>    | 0.48     | 0.43      | 0.16     |
| <i>95% conf.</i> | 0.50     | 0.45      | 0.17     |

Product Ratio vs Concentration for Nitration of Toluene: To evaluate the possible role of more complicated mechanistic possibilities on the nitration regiochemistry, the selectivity was examined at a range of concentrations, including neat toluene, 2 M, 1 M, 0.1 M, and 0.01 M, by procedures matching or analogous to those described above. The results are shown in Table S2.

**Table S2:** Product ratios vs concentrations for nitration of toluene

| Concentration | Para (%) | Ortho (%) | Meta (%) |
|---------------|----------|-----------|----------|
| No solvent    | 41.1     | 56.3      | 2.6      |
| 2 M           | 40.7     | 56.6      | 2.7      |
| 1 M           | 39.5     | 57.9      | 2.7      |
| 0.1 M         | 41.1     | 56.9      | 2.0      |
| 0.01 M        | 41.1     | 56.6      | 2.2      |

## Computational Procedures and Supporting Computational Results

### General

Calculations of structures, energies, and frequencies employed default procedures in Gaussian09<sup>1,2,3</sup> unless otherwise noted. Complete structures and energetics are provided in sections below. All absolute energies are in Hartrees. All relative energies are presented in kcal/mol.

While most calculated structures were obtained using the default grid, in some cases it was necessary to employ an ultrafine grid to obtain satisfactory structure convergence or frequencies. Structures obtained with an ultrafine grid have the label “uft”. For all such structures, single-point energies with the default grid were obtained to ensure that the change in grid had no significant effect on the potential energy.

The program suite PROGDYN used for dynamics is a series of component programs written as either Unix shell scripts or awk programs. Gaussian09 was used to calculate the forces at each point in trajectories. A full description of PROGDYN including listings of the subprograms can be found in a later section. The latest version of this program can be obtained by emailing Daniel Singleton at [singleton@chem.tamu.edu](mailto:singleton@chem.tamu.edu). The original version of this program was published in the Supporting Information of a previous paper.<sup>4</sup>

The program PROGMC is a new program consisting of a series of component programs written as either Unix shell scripts or awk programs. Gaussian09 was used to calculate the raw energies for each test geometry, and PROGMC adjusts these energies by biasing potentials and a potential used to maintain a spherical solvent cluster. A full description of PROGMC including listings of the subprograms can be found in a later section.

IRCs were not conducted for all structures; rather, they were only conducted for structures where an examination of the transition vector left the outcome of the IRC in reasonable doubt. In some cases, particularly when IRC calculations failed, trajectory calculations were carried out to determine the products from a transition structure, and it was presumed that the IRC would lead to the major product from the trajectories. There are cases where this assumption would be incorrect, but in those cases we would argue that trajectories provide a *better* measure of the product from a transition structure than an IRC.

### Additional Comments on the ONIOM Model and the Conditions for Simulations.

As discussed in the main text, the simulations in explicit solvent employed a two-layer ONIOM calculation, using M06-2X/6-311G\* for the toluene / NO<sub>2</sub><sup>+</sup> and PM3 for the BF<sub>4</sub><sup>-</sup> and CH<sub>2</sub>Cl<sub>2</sub>. There were a number of considerations in this choice and there are some advantages and disadvantages to the calculational method chosen.

For the reaction of NO<sub>2</sub><sup>+</sup> with toluene, the energetics of the NO<sub>2</sub><sup>+</sup> interaction with toluene were considered paramount. The main text discusses our choice of M06-2X/6-311G\* for this interaction, and a later section describes in detail the validation studies with respect to this interaction. It is important to note that the method performs very well versus CCSD(T) calculations on the critical part of the energy surface, as well as on the relative energies of the isomeric s-complexes. It should also be noted that increasing the size of the basis set did not improve performance on the validation studies.

For the NO<sub>2</sub><sup>+</sup> interaction with the BF<sub>4</sub><sup>-</sup> counterion, the most pressing priority was avoid the unreal decomposition of the NO<sub>2</sub>BF<sub>4</sub>. Any method maintains the long-range electrostatic attraction of the ions, and a later section details the unsurprisingly excellent performance of the ONIOM calculations at long range. While DFT methods underestimate the barrier for this reaction, the PM3 portion of the ONIOM overestimates the stability of the NO<sub>2</sub>BF<sub>4</sub>, and it underestimates the gas-phase attraction of the ions at close range – see page S123. The former is not a problem, while the latter will tend to make the counterion act like a larger counterion. In toluene solvent, NO<sub>2</sub>BF<sub>4</sub>, NO<sub>2</sub>PF<sub>6</sub>, NO<sub>2</sub>ClO<sub>4</sub>, NO<sub>2</sub>Cl/TiCl<sub>4</sub>, NO<sub>2</sub>Cl/SnCl<sub>4</sub>, NO<sub>2</sub>Cl/BF<sub>3</sub>, and NO<sub>2</sub>Cl/PF<sub>5</sub> all provide product ratios that are within experimental error of each other. For this reason, it was viewed that the tightness of counterion to the NO<sub>2</sub><sup>+</sup> is not a major factor in the reaction's selectivity, so the error in the ONIOM surface was considered acceptable.

For the solvent, our concerns were that the solvent have a reasonable the dipole moment and that it be polarizable. The PM3 calculations underestimate the dipole moment (1.36 D versus 1.6 D) so our computational solvent is less polar than pure CH<sub>2</sub>Cl<sub>2</sub>. However, our experimental solvent contains toluene, making it less polar, and we used a range of concentrations up to 2 M with little change in the product ratio.

All semi-empirical methods underestimate the polarizability of molecule, and the PM3 calculations do so with CH<sub>2</sub>Cl<sub>2</sub>. The  $\alpha_{xx}$ ,  $\alpha_{xy}$ ,  $\alpha_{yy}$ ,  $\alpha_{xz}$ ,  $\alpha_{yz}$ ,  $\alpha_{zz}$  tensors for CH<sub>2</sub>Cl<sub>2</sub> for PM3 are 39.3, 0, 20, 0, 0, and 7.7, respectively. For comparison, the tensors calculated M062X/6-311+G(2df,2pd) are 51, 0, 34.8, 0, 0, and 30.2. Along the most polarizable axis, the PM3 polarizability is about 77% of the actual polarizability.

A significant issue then with using PM3 CH<sub>2</sub>Cl<sub>2</sub> as solvent is that it is a gas at 25 °C. For this reason, the spheres and cubes of solvent described below are compressed at approximately 400 bar to maintain a density of 1.3. The solvent's heat of vaporization is only about 2.4 kcal/mol, compared to the experimental value of 6.8 kcal/mol. In this regard the solvent is not very realistic but this was not expected to be a critical factor in the simulation.

### Initialization of Trajectories and Additional Details on Trajectories

Trajectories were initialized in differing ways depending on the details of the calculation. All trajectories started from transition structures (simple potential energy saddle points) or canonical variational transition structures (CVTSs) were quasiclassical. This includes trajectories started from **4a<sup>‡</sup>**, **4b<sup>‡</sup>**, **4c<sup>‡</sup>**, **5a<sup>‡</sup>**, **5b<sup>‡</sup>**, **5c<sup>‡</sup>**, **6a<sup>‡</sup>**, **6b<sup>‡</sup>**, **6c<sup>‡</sup>**, and related transition structures.

For quasiclassical trajectories, each normal mode in the transition structure of interest was given its zero-point energy plus a Boltzmann distribution of quantized vibrational energies. The desired energy in each of the normal modes of the transition structure was mapped from a random number generator to a Boltzmann distribution set at 25 °C. The phase of each of the normal modes was mapped from a Gaussian distribution of random numbers. This distribution is not correct for a classical oscillator but would be approximately correct for a quantum oscillator in its ground state (only ignoring mode displacements outside of the classical limit), and has the advantage that a larger portion of the trajectories start with an energy approximating the initially desired energy. The sign on the velocity of the normal modes was randomized. After an energy/force calculation on the initial geometry, the total initial energy was calculated and the trajectory was thrown out if the energy did not agree satisfactorily (within 1 kcal/mol) with the desired energy. (This is a variation of the conventional practice of scaling energies.<sup>5</sup>) The mode corresponding to the transition vector was treated classically. A sample PROGDYN parameter file (progdyn.conf) is given in a later section.

The trajectories in explicit solvent and related supporting studies were fully classical, and their initiation is described in subsequent sections.

### PMF Trajectory Initialization, PMF in a Solvent Cube, and Extended Data

The process for generating starting structures for trajectories in a sphere of 101 CH<sub>2</sub>Cl<sub>2</sub> molecules was circuitous. Initial structures were generated by surrounding molecules of toluene and NO<sub>2</sub><sup>+</sup> with 102 CH<sub>2</sub>Cl<sub>2</sub> molecules, using a cube of CH<sub>2</sub>Cl<sub>2</sub> geometries generated with an Excel spreadsheet. The distance between the aromatic ring carbons and the ipso and para carbons of toluene was constrained at ≈4 Å using the *fixedatom* resource in PROGDYN, and six random trajectories were initiated at 1000 Kelvin using a PM3 surface. The solvent molecules were forced into a cube with 22.4 Å sides using the *boxon* facility in PROGDYN, and the six trajectories were equilibrated at 1000 Kelvin for 5 ps, then cooled slowly to 25 °C using the thermostat facility in PROGDYN with thermostatmult set at 0.999 (removing 0.1% of the energy per fs), and equilibration at 298 K was continued for 5 ps.

The set of six trajectories was then duplicated to give two sets. The first set of six trajectories will be used in a later section. For the second set of six, a CH<sub>2</sub>Cl<sub>2</sub> molecule was converted into a BF<sub>4</sub><sup>-</sup> molecule. The latter were equilibrated for 5 additional ps in PM3 calculations, using at this stage a harmonic potential to maintain a 3 Å separation between the NO<sub>2</sub><sup>+</sup> and the BF<sub>4</sub><sup>-</sup> ions. The two sets of six trajectories were then equilibrated at 25 °C with only the nitrogen atom – arene carbon constraint for 5 ps in ONIOM calculations using M06-2X/6-311G\* for the toluene / NO<sub>2</sub><sup>+</sup> and PM3 for the BF<sub>4</sub><sup>-</sup> (when present) and CH<sub>2</sub>Cl<sub>2</sub>.

The six sets of trajectories including NO<sub>2</sub><sup>+</sup>BF<sub>4</sub><sup>-</sup> were then duplicated five times (for a total of 36 sets of trajectories) and dispersed using a series of interlocking-sphere biasing potentials (see the section below for details) using the *applyforce* facility in PROGDYN. All other constraints were turned off. The biasing potential sphere radii and number of assigned trajectories for these potentials were 2.1 Å (5), 2.2 Å (3), 2.5 Å (3), 2.8 Å (3), 3.1 Å (3), 3.4 Å (3), 3.7 Å (3), 4.0 Å (3), 4.3 Å (2), 4.6 Å (2), 4.9 Å (2), 5.2 Å (2), and 5.5 Å (2). These trajectories were equilibrated for 5 ps, then nitrogen-carbon distance data was collected and analyzed using the weighted-histogram analysis method (see reference in main text and sample files in a later section).

A total of 240 ps of MD was obtained, and the results are shown in Figure S2. The PMF

exhibits the same absence of a barrier seen later. It was judged however that the use of a cubic box of solvent was non-optimum, in part because the rigid box facility in PROGDYN is relatively subject to edge effects and in part because of the non-isotropic distribution of solvent molecules.

**Figure S2.** Potential of mean force curve for approach of  $\text{NO}_2^+\text{BF}_4^-$  to toluene in a 22.4 Å cube of 101  $\text{CH}_2\text{Cl}_2$  molecules.

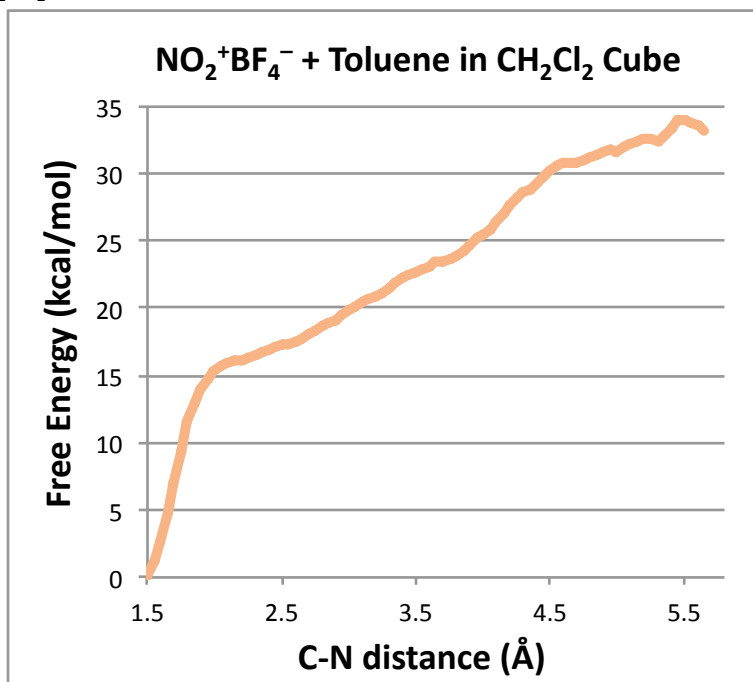

Each of the cubic structures was then molded into a sphere with a soft 25.8 Å diameter using the *sphereon* facility in PROGDYN, and equilibrated for 5 ps after achieve a spherical shape. Once in a sphere, the N atom of the  $\text{NO}_2^+$  was constrained to the center of the sphere by a weak harmonic potential (with  $k = 0.119 \text{ kcal/mol/Å}^2$ ) to the middle of the sphere, using the *zeroatom* facility in PROGDYN. The sphere was maintained with a density of 1.3 by a harmonic restoring potential (with  $k = 11.86 \text{ kcal/mol/Å}^2$ ) on atoms outside of 12.9 Å from the center of the sphere. That is, a force is applied to atoms that are outside of 12.9 Å from the center of the sphere, along a vector toward the center of the sphere. The magnitude of the force was set to  $(\text{distance to center} - 12.9 \text{ Å}) \times 11.86 \text{ kcal/mol/Å}^2$ . These parameters are set with the “*sphereon 1*”, “*spheresize 12.9*”, and “*sphereforce 0.01*” keywords in PROGDYN. A later section gives the complete PROGDYN parameter file (progdyn.conf) for these trajectories.

Duplication of trajectories and dispersal with differing biasing potentials ultimately generated a total of 66 separate trajectories from which MD data was collected. In all cases care was taken to maximize the independence of separate trajectories. In some cases the trajectories were cut short and were not restartable. This arose from a bug in PROGDYN; if a PROGDYN run cannot write to disk (as occurs when a disk quota maximum is reached), the files necessary for restarting runs can be lost. As a result, the length of the separate trajectories varies from 4 ps to 52 ps. The biasing potential sphere radii and number of assigned trajectories for these potentials were 1.9 Å (7), 2.0 Å (7), 2.1 Å (6), 2.2 Å (11), 2.35 Å (6), 2.5 Å (3), 2.8 Å (4), 3.1 Å (3), 3.4 Å (4), 3.7 Å (3), 4.0 Å (3), 4.3 Å (2), 4.6 Å (2), 4.9 Å (2), 5.2 Å (2), and 5.5 Å (2).

Figure S3 below shows an extended version of Figure 1 from the main text, including all data. The roughness of the PMF surface at long C-N distances is most likely due to limited data in this range.

**Figure S3.** Extended version of Figure 1 from main text showing all available MD data.

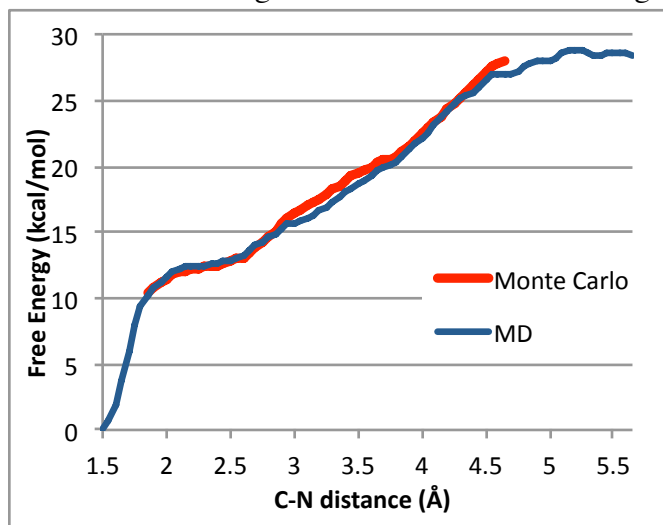

### Product-Forming Trajectories for the Full Model

To generate product-forming trajectories, PMF trajectories above in which the interlocking-sphere biasing potential was zero at 3.4-4.0 Å were used as “feeder” trajectories to provide starting points. At 250 fs intervals the helper program *prodynsam* (listed in a later section) was used to create a *geoPlusVel* file for use in PROGDYN. The *prodynsam* program leads to trajectories with all atoms moving at their current velocity. Each resulting unconstrained trajectory was integrated forward and backward in time until one of the regioisomers of **2** (defined by a C-N distance of <1.6 Å) was formed.

A typical starting point for product-forming trajectories is shown below in two formats. In the first, there are no special effects for the picture. The solvent molecules are seen clearly but the reactants are somewhat obscured.

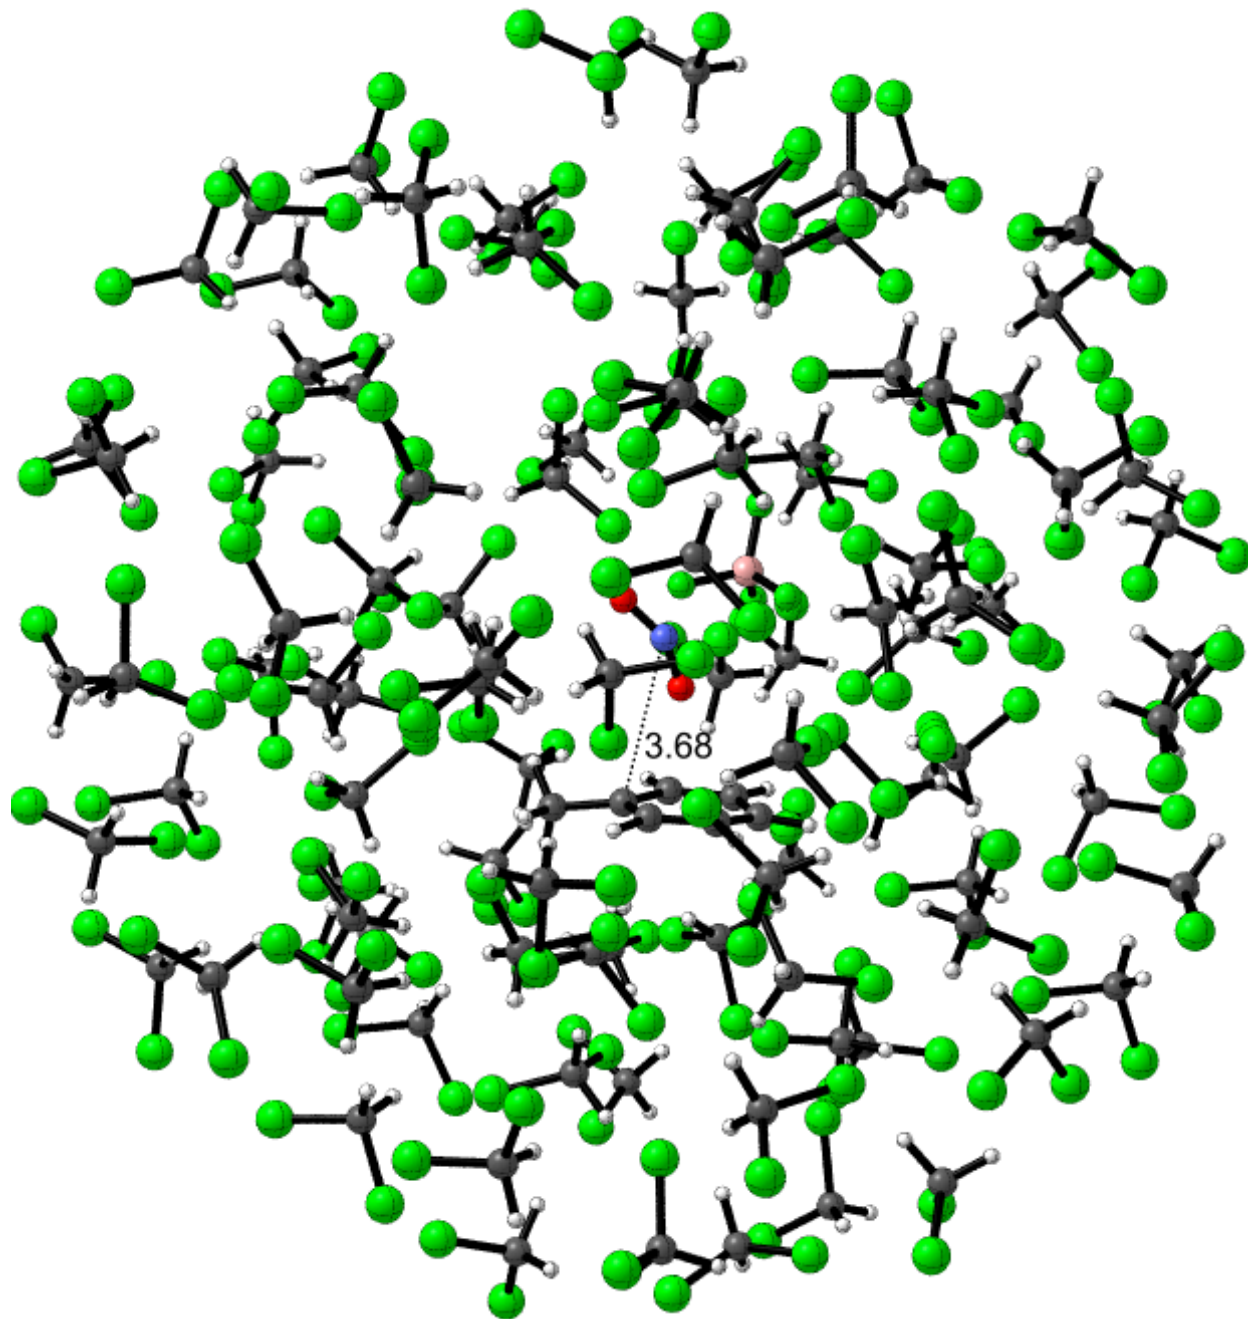

In the second view below, the solvent molecules are “transparent” and a focal point is set in the area of the reactants.

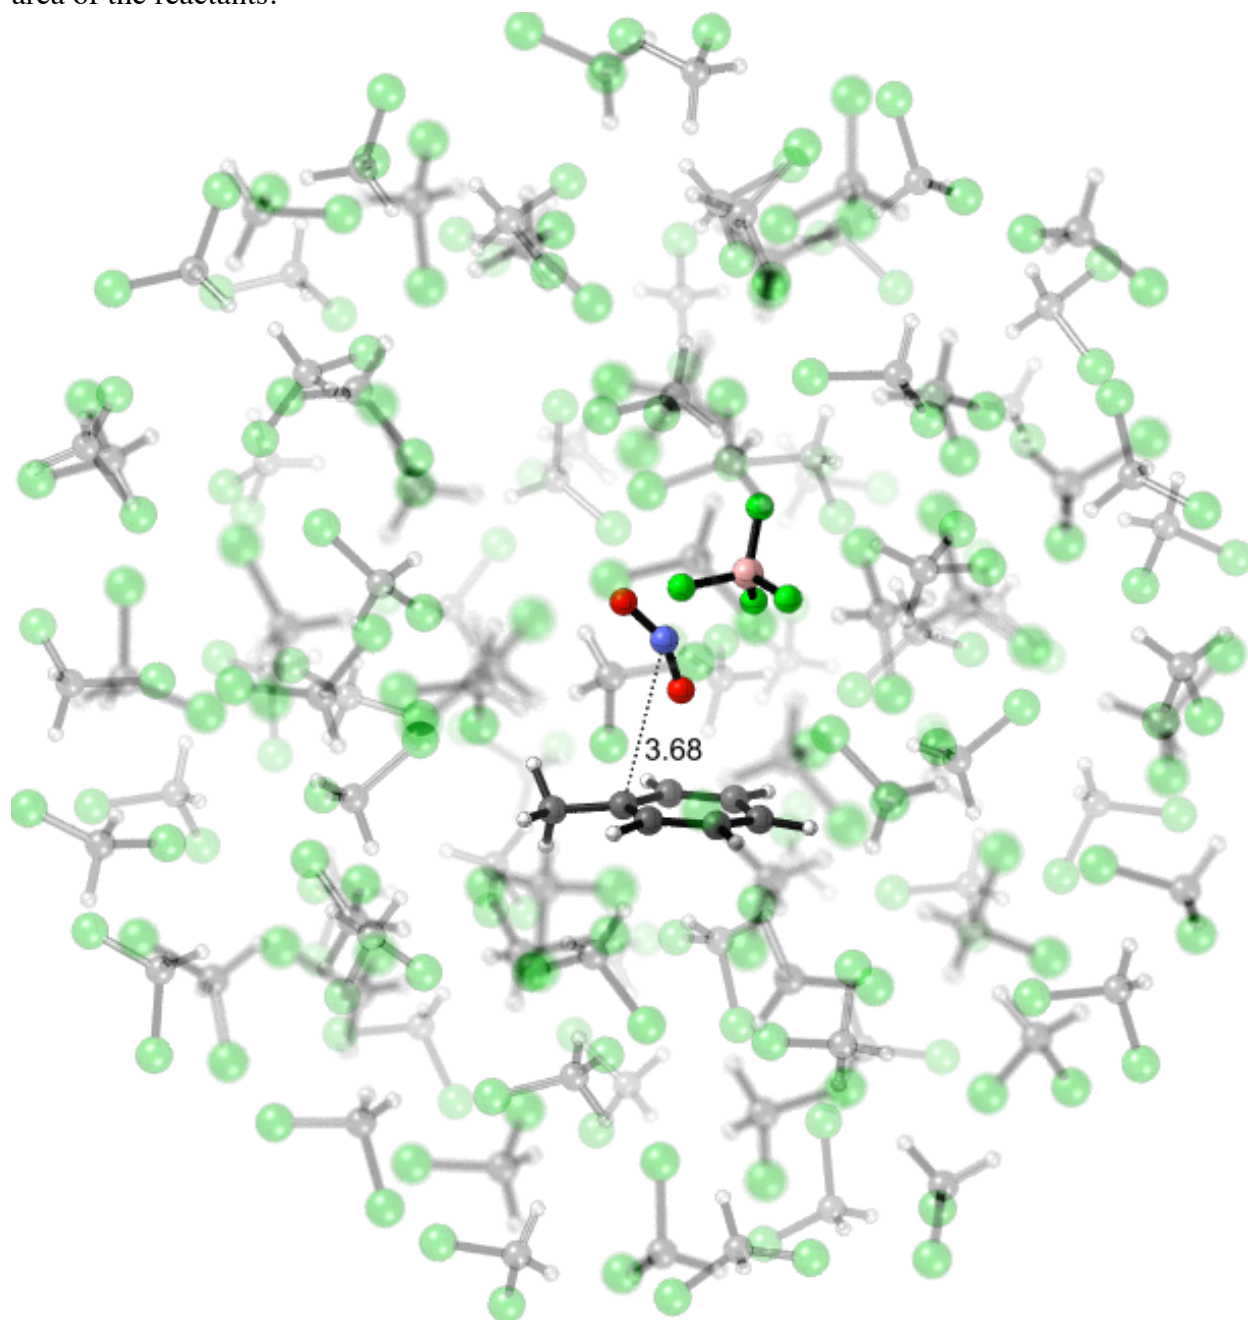

### Product-Forming Trajectories using $\text{NO}_2^+\text{BF}_4^-$ in Implicit Solvent.

A series of six trajectories containing only toluene and  $\text{NO}_2^+\text{BF}_4^-$  were created by taking six of the PMF trajectories in implicit solvent from above and deleting all of the solvent molecules, then continuing the trajectories with a PCM implicit solvent model for  $\text{CH}_2\text{Cl}_2$  and the same interlocking-sphere biasing potential as in the source trajectories. The biasing potential sphere radii and number of assigned sequences for these potentials were 3.4 Å (1), 3.7 Å (2), 4.0 Å (2), and 4.3 Å (1). These “feeder” trajectories were then equilibrated and thermostated at 25 °C for 2 ps. The energy surface was ONIOM / PCM( $\text{CH}_2\text{Cl}_2$ ), using M06-2X/6-311G\* for the



toluene and  $\text{NO}_2^+$  and PM3 for the  $\text{BF}_4^-$ .

After equilibration, at 250 fs intervals the helper program *prodynsam* (listed in a later section) was used to create a *geoPlusVel* file for use in PROGDYN. The *prodynsam* program leads to trajectories with all atoms moving at their current velocity. Each resulting unconstrained trajectory was integrated forward and backward in time until one of the regioisomers of **2** (defined by a C-N distance of  $<1.6 \text{ \AA}$ ) was formed, or the  $\text{NO}_2^+$  dissociated as judged by a C-N distance  $> 5.0 \text{ \AA}$ .

A total of 151 results were obtained:

- 32 – dissociated
- 48 – formed the para product
- 19 – formed the meta product
- 38 – formed the ortho product
- 14 – formed the ipso product

### Product-Forming Trajectories using $\text{NO}_2^+$ in Implicit Solvent.

A series of six trajectories containing only toluene and  $\text{NO}_2^+$  were created by taking six of the PMF trajectories in implicit solvent from above and deleting all of the solvent molecules and the  $\text{BF}_4^-$ , then continuing the trajectories with a PCM implicit solvent model for  $\text{CH}_2\text{Cl}_2$  and interlocking-sphere biasing potentials with radii  $3.7 \text{ \AA}$ . These “feeder” trajectories were then equilibrated and thermostated at  $25 \text{ }^\circ\text{C}$  for 2 ps. The energy surface was M06-2X/6-311G\*/PCM( $\text{CH}_2\text{Cl}_2$ ).

After equilibration, at 250 fs intervals the helper program *prodynsam* (listed in a later section) was used to create a *geoPlusVel* file for use in PROGDYN. The *prodynsam* program leads to trajectories with all atoms moving at their current velocity. Each resulting unconstrained trajectory was integrated forward and backward in time until one of the regioisomers of **2** (defined by a C-N distance of  $<1.6 \text{ \AA}$ ) was formed, or the  $\text{NO}_2^+$  dissociated as judged by a C-N distance  $> 5.0 \text{ \AA}$ .

A total of 149 results were obtained:

- 0 – dissociated
- 41 – formed the para product
- 34 – formed the meta product
- 37 – formed the ortho product
- 37 – formed the ipso product

### Product-Forming Trajectories using $\text{NO}_2^+$ in Explicit $\text{CH}_2\text{Cl}_2$ .

A previous section described the creation of a set of six trajectories including toluene and  $\text{NO}_2^+$  but no counterion in 102 explicit  $\text{CH}_2\text{Cl}_2$  molecules. After the previously described equilibration, these trajectories were continued with constrained C-N distances of  $\approx 4.0$  on the ONIOM energy surface. At 250 fs intervals the helper program *prodynsam* (listed in a later section) was used to create a *geoPlusVel* file for use in PROGDYN. The *prodynsam* program leads to trajectories with all atoms moving at their current velocity. Each resulting unconstrained trajectory was integrated forward and backward in time until one of the regioisomers of **2** (defined by a C-N distance of  $<1.6 \text{ \AA}$ ) was formed, or the  $\text{NO}_2^+$  dissociated as judged by a C-N distance  $> 5.0 \text{ \AA}$ .

A total of 209 results were obtained:

- 0 – dissociated
- 67 – formed the para product
- 37 – formed the meta product
- 97 – formed the ortho product
- 8 – formed the ipso product

It should be noted that these trajectories were conducted in a cube of solvent, not a sphere. Exploratory studies did not find any significant difference between product-forming trajectories in a cube versus a sphere.

### Monte Carlo Starting Points, Equilibration, and Extended Data

The starting geometries for a series of 48 Monte Carlo geometry sequences were taken from MD structures in the later half of their data collection. The biasing potential sphere radii and number of assigned sequences for these potentials were 1.8 Å (6), 2.0 Å (6), 2.1 Å (5), 2.2 Å (6), 2.35 Å (6), 2.5 Å (2), 2.8 Å (2), 3.1 Å (3), 3.4 Å (2), 3.7 Å (2), 4.0 Å (2), 4.3 Å (2), 4.6 Å (2), and 4.9 Å (2). The resulting geometries were equilibrated for 1000 steps when the biasing potential was unchanged versus the MD source of the geometry, and for 5000 steps when the biasing potential was changed versus the MD source.

As internal checks of the Monte Carlo data, we monitored whether the overall average C-N distance varied systematically as the sequences proceeded, and we monitored whether independent sequences provided equivalent data. Some of the data obtained failed these internal checks, and these data were not included in Figure 1 of the main text. This requires some explanation.

In a Monte Carlo program, a central problem is how to explore coordinate space in a fully representative way in as few of steps as possible while keeping a reasonable percentage of the steps acceptable. PROGMC approaches this problem by dividing the system into molecules, performing translations and rotations on the molecules as a whole, stepping the bond lengths in each molecule by necessarily relatively small steps, and stepping angles and dihedral angles by larger steps using an algorithm that steps along two vectors that are orthogonal to the bond stretch and each other. The program was judged nicely efficient at dealing with the  $\text{NO}_2^+$ ,  $\text{BF}_4^-$ , and 101  $\text{CH}_2\text{Cl}_2$  molecules. It had trouble however dealing with the large distortions of the toluene ring that are associated with  $\text{NO}_2^+$  attack. This trouble was associated with a common problem with ring structures and internal coordinates; small changes in internal coordinates in rings can have large effects on the “last” bond in a ring, that is, the one that is not directly determined by an internal coordinate. This is a well-known solvable problem but is not solved yet in the current code. The code instead decreased the motion of atoms in the toluene ring, but this slows large geometry changes in the ring. Because of the problem with slow equilibration in the area of the surface associated with  $\text{NO}_2^+$  attack, we did not include that portion of the data in Figure 1. Figure S4 displays the complete data. The Monte Carlo results still show the same qualitative pattern as the MD data, but, lacking a full exploration of the space associated with **2**, the energy dip in this area (with a C-N distance less than 1.85 Å) is far less pronounced.

**Figure S4.** Extended version of the Monte Carlo data from Figure 1 of the main text showing all available data.

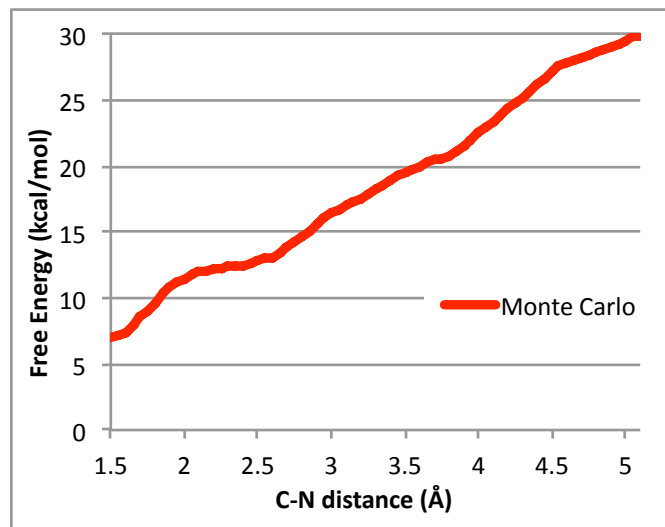

### The Interlocking Sphere Biasing Potential

The use of simple biasing potentials based on the distance of the nitrogen atom from a chosen carbon atom, such as the *para* carbon, fails. The failure occurs because the  $\text{NO}_2^+$  remains free to attack the other aromatic carbons, and it invariably does so except when the biasing potential sets very short C-N distances. This problem was avoided using the more complicated biasing potential to be described here. The next section discusses in more detail the meaning of the PMF curve for this complex biasing potential.

The MD and Monte Carlo calculations employed biasing potentials that were based on interlocking spheres centered on the arene ring carbons. The surface of the spheres represents the zero of the potential, and the applied potential was  $0.5 * 118.6 \text{ kcal/mol}/\text{\AA}^2 * r^2$  where  $r$  is the distance of the nitrogen atom from the closest surface point of the spheres. For Monte Carlo calculations, this potential was simply added to the energy of the system. For MD calculations, the nitrogen atom and the carbon atom at the center of the closest sphere were subjected to a restoring force along their internuclear axis.

The first picture below illustrates the interlocking spheres when at a radius of 2.5 Å from the carbon nuclei, using transparency to show the positions of the carbon nuclei. It should be noted that the spheres move with the motion of the carbon atoms, and that no sphere was placed around the methyl-group carbon. The second picture shows the solid zero-potential surface.

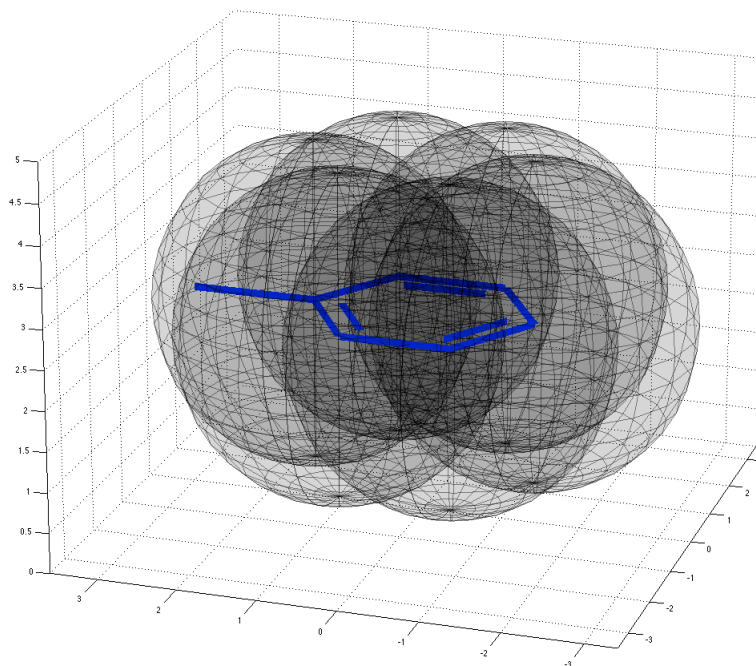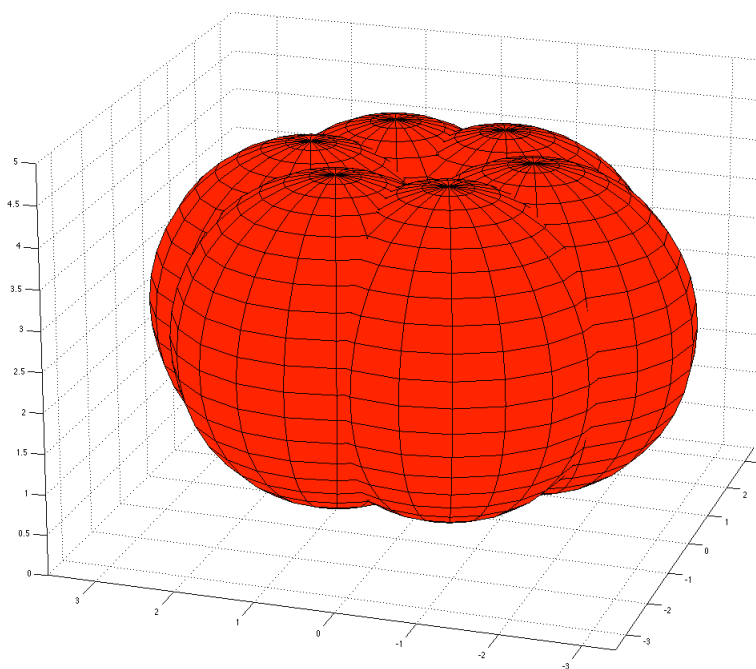

### **Additional Discussion of the Meaning of the Figure 1 PMF Curves**

The interlocking-sphere biasing potential that was employed lets the  $\text{NO}_2^+$  roam from carbon to carbon in the MD and Monte Carlo simulations. However, the energetics of the system can restrict the roaming, depending on the distance of the  $\text{NO}_2^+$  from the ring. Some discussion

of these effects on roaming and how they affect the meaning of the PMF curves will be given here.

Table S3 below shows the radius of the spheres in the biasing potential (which we will simplistically call the “C-N distance”), the total MD time for each radius, the number of “switches” for each radius where a “switch” is a change of closest carbon from one carbon to another (a simple measure of the roaming of the  $\text{NO}_2^+$ ), the average time between switches, and the percentage of the time that the MD trajectories were nearest the para, meta, ortho, or ipso carbons.

We first consider the roaming of the  $\text{NO}_2^+$  at relatively long C-N distances. In a medium range between C-N distances of 2.8 Å and 4.3 Å, switches are common. At the longest C-N distances (4.6 Å or greater), switches become less common. This is likely to be simply a geometry effect – the spheres have become bigger and their surface near the plane of the aromatic becomes accessible, so the  $\text{NO}_2^+$  must roam a greater average distance to switch from carbon to carbon. At C-N distances between 3.4 and 4.0 Å, the distribution of para / meta / ortho / ipso carbons as closest to the  $\text{NO}_2^+$  appears roughly statistical (allowing for a factor of 2 as appropriate), as mentioned in the main text. The distribution also appears to be statistical at longer distances, though there is more fluctuation in the numbers, perhaps due to the lower total time of the MD simulations.

**Table S3.** Roaming Information in MD trajectories with a biasing potential.

| potential<br>sphere radius | total time<br>(fs) | "switches" | time (fs) /<br>switch | % para | %meta | %ortho | %ipso |
|----------------------------|--------------------|------------|-----------------------|--------|-------|--------|-------|
| 2 Å                        | 125539             | 18         | 6974                  | 45     | 15    | 35     | 5     |
| 2.1 Å                      | 129184             | 39         | 3312                  | 91     | 2     | 7      | 0     |
| 2.2 Å                      | 140594             | 271        | 519                   | 57     | 9     | 18     | 16    |
| 2.35 Å                     | 108354             | 682        | 159                   | 35     | 9     | 27     | 29    |
| 2.5 Å                      | 107698             | 1025       | 105                   | 26     | 10    | 20     | 44    |
| 2.8 Å                      | 119991             | 2102       | 57                    | 4      | 7     | 32     | 57    |
| 3.1 Å                      | 47370              | 767        | 62                    | 37     | 35    | 23     | 5     |
| 3.4 Å                      | 47016              | 1286       | 37                    | 17     | 25    | 35     | 23    |
| 3.7 Å                      | 46588              | 1296       | 36                    | 20     | 25    | 35     | 20    |
| 4 Å                        | 46943              | 1989       | 24                    | 24     | 32    | 30     | 14    |
| 4.3 Å                      | 28072              | 1029       | 27                    | 20     | 29    | 33     | 18    |
| 4.6 Å                      | 26652              | 546        | 49                    | 18     | 29    | 20     | 32    |
| 4.9 Å                      | 20823              | 316        | 66                    | 15     | 33    | 32     | 20    |
| 5.2 Å                      | 19389              | 165        | 118                   | 11     | 43    | 31     | 16    |
| 5.5 Å                      | 15219              | 79         | 193                   | 17     | 36    | 39     | 8     |

At C-N distances of 2.8 and 2.5 Å, the  $\text{NO}_2^+$  appears to prefer to be near the ipso carbon. In this distance range we see a similar preference for the  $\text{NO}_2^+$  to be near the ipso carbon in PCM calculations. As mentioned in the main text, the most stable transition structure for attack of  $\text{NO}_2^+$  on toluene in PCM calculations was one for attack at the ipso carbon. At 2.35 and 2.2 Å, a preference for the  $\text{NO}_2^+$  to be near the para carbon emerges.

At distances shorter than 2.2 Å, there is a significant complication in the data. That is,

switches are sufficiently uncommon that we can no longer expect the ratio of the closest carbons to reflect a thermodynamic preference. Random statistical effects impact all of the *para* / *meta* / *ortho* / *ipso* ratios in the table, but at the shortest distances the ratios depend on the starting points. The 2 Å data contains a significant amount of time in which the *meta* and *ipso* carbons were closest simply because the starting points afforded significant amounts of these points. The 2 Å data should be recognized as a range that includes C-N distances down to 1.5 Å. At the shortest distances it is far more stable for the  $\text{NO}_2^+$  to be near the *para* carbon. When trajectories switch from *meta* or *ipso* to *ortho* or *para* and stay there for > 500 fs, they never switch back. For this reason, the *meta* and *ipso* 2 Å data are questionable, since they do not appear to be the result of a full equilibration. A reanalysis leaving out this data had no significant effect on the MD PMF curve.

This brings up an important caveat on our conclusions. That is, because we have no fully-defensible data for MD with the  $\text{NO}_2^+$  nearest the *meta* or *ipso* carbons, we do not know whether there is a barrier for the formation of the *meta* or *ipso* isomers of **2**. We can only say that there is no free-energy barrier along the C-N distance coordinate for attack at the *para* and *ortho* carbons.

### Additional Plots of Trajectories, Comments

#### Full Model (Explicit Solvent, $\text{NO}_2^+ \text{BF}_4^-$ )

This short trajectory illustrates how the nitronium can approach a carbon to within 2 Å then pull back without reacting.

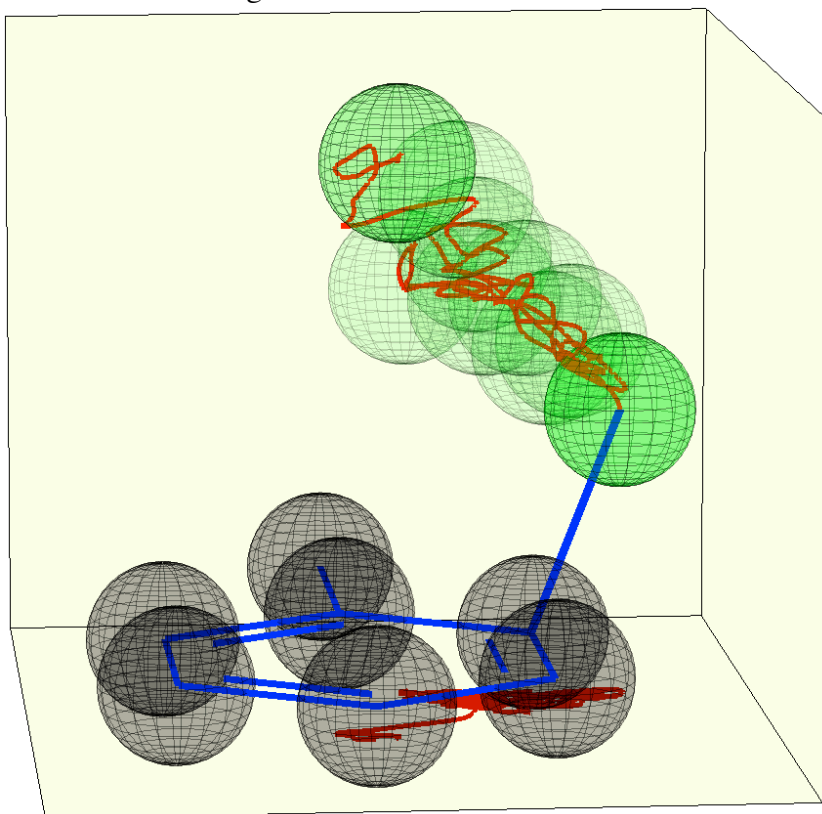

The nitrogen roams in its relative position versus the carbons quickly when the nitrogen is far from the ring carbons, but the roaming slows as the nitrogen approached the ring.

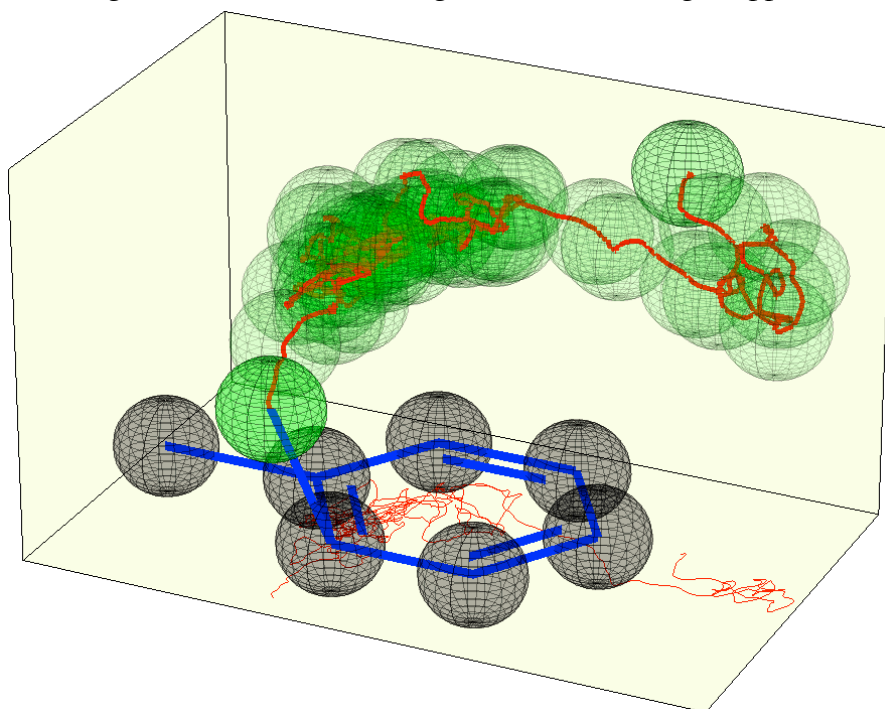

This trajectory switches from approach to the para carbon to meta attack at the very end.

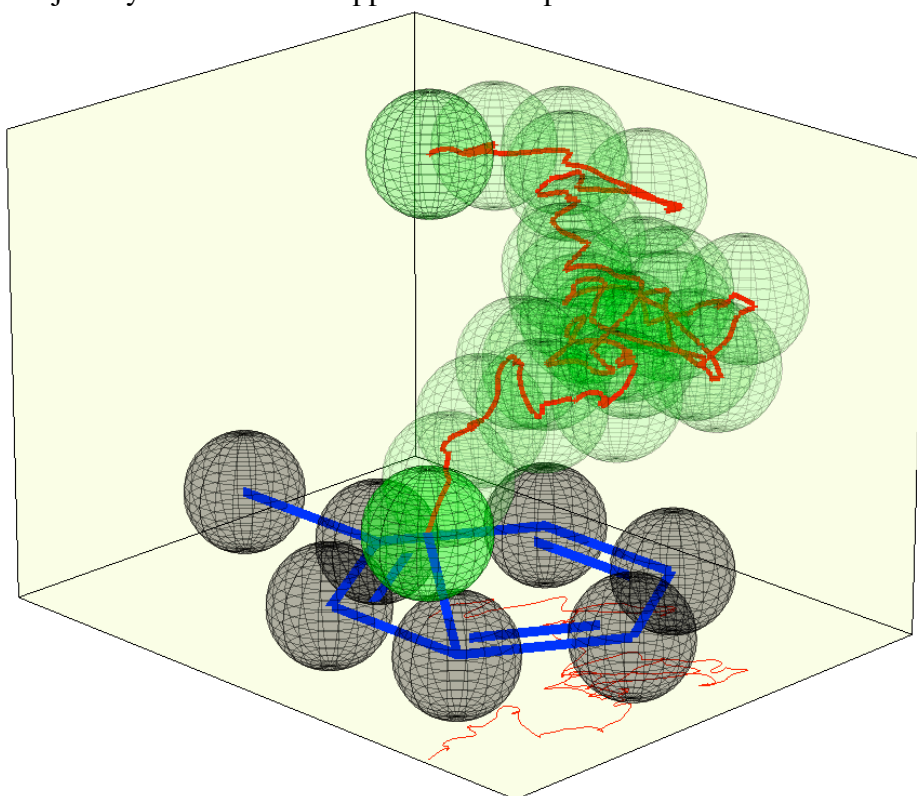



This latter part of this trajectory has the  $\text{NO}_2^+$  in between the ortho and ipso carbons, before finally seeing attack at the ipso position.

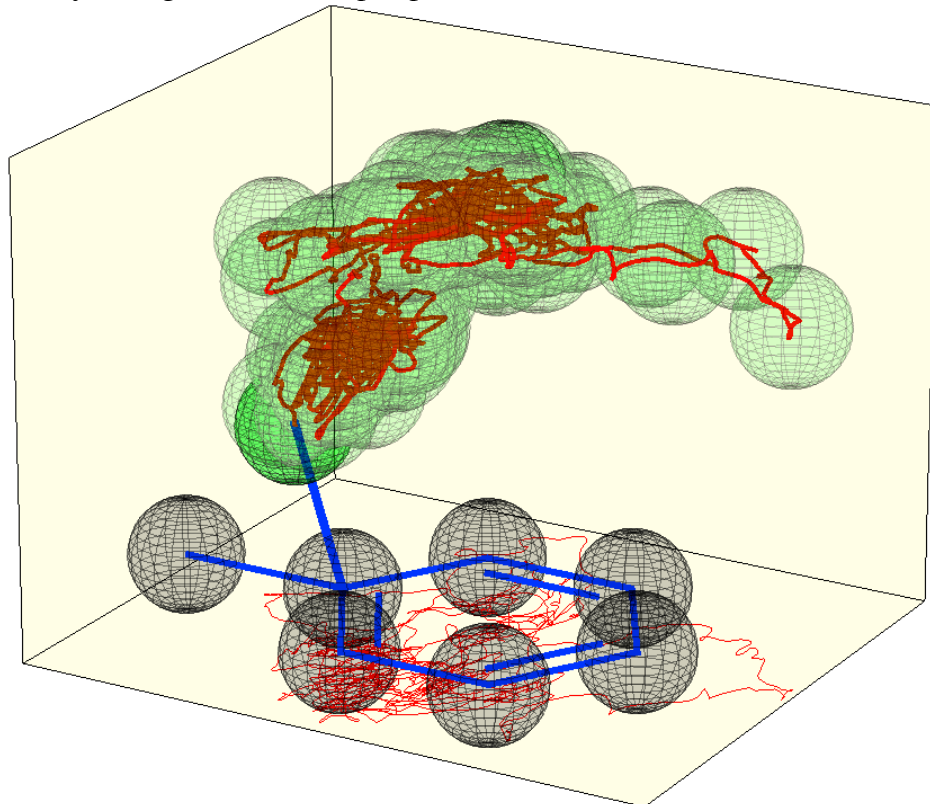

This trajectory makes a late switch from meta to para attack.

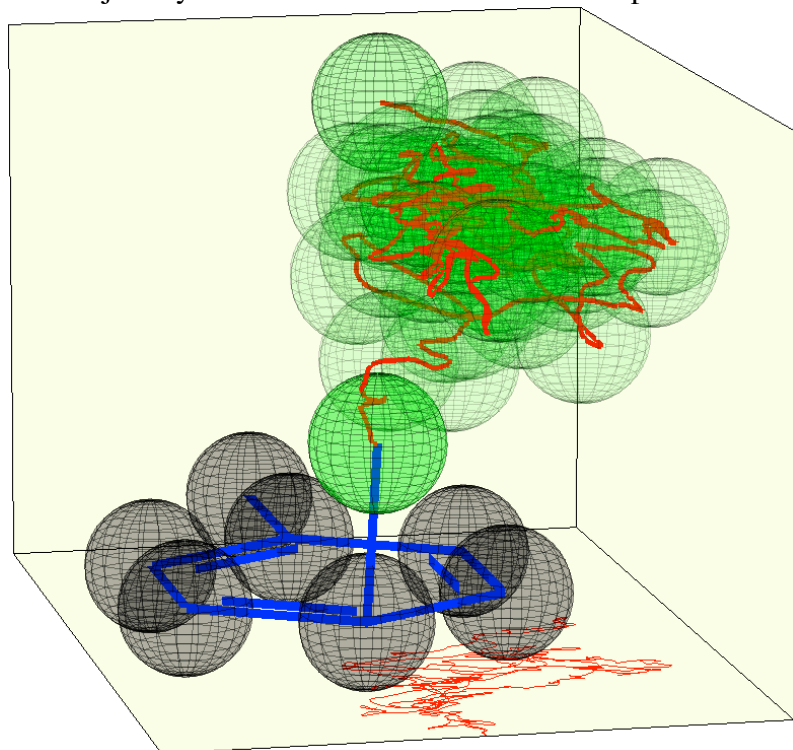

$\text{NO}_2^+ \text{BF}_4^-$  in a PCM Model



The median time of 1150 fs includes many short trajectories like this one, affording the para  $\sigma$ -complex in 426 fs.

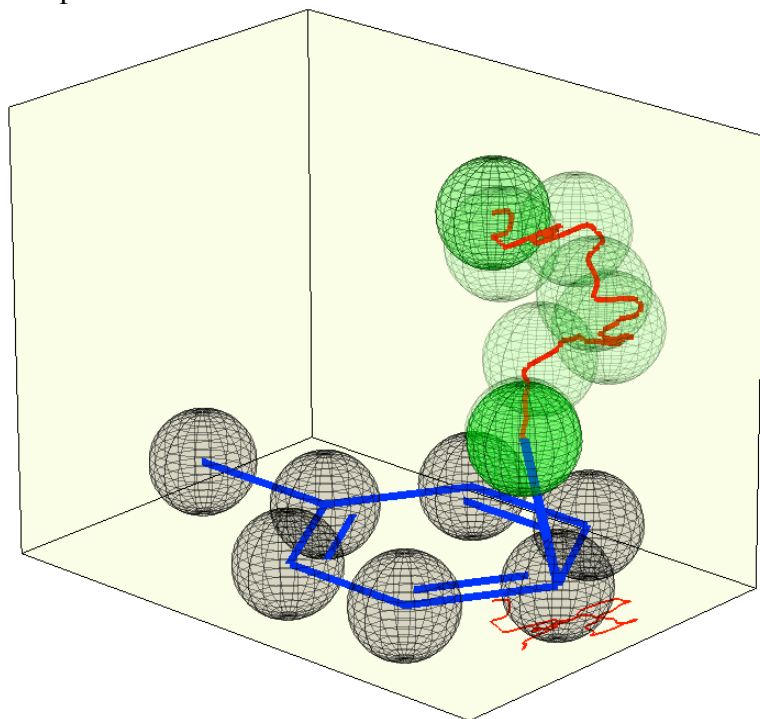

Here is one of the longer trajectories in explicit solvent, taking 1787 fs to afford the ipso product. The nitronium spends most of the time at  $>3 \text{ \AA}$  from the arene carbons, then rapidly forms product after approaching closer.

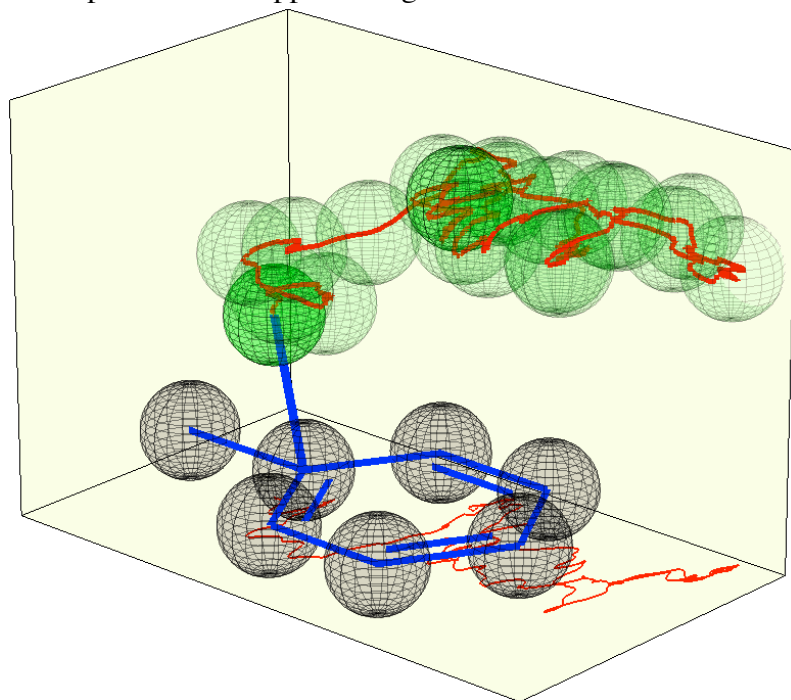

Ortho product formation in 631 fs. Notice how little the trace meanders before product formation.

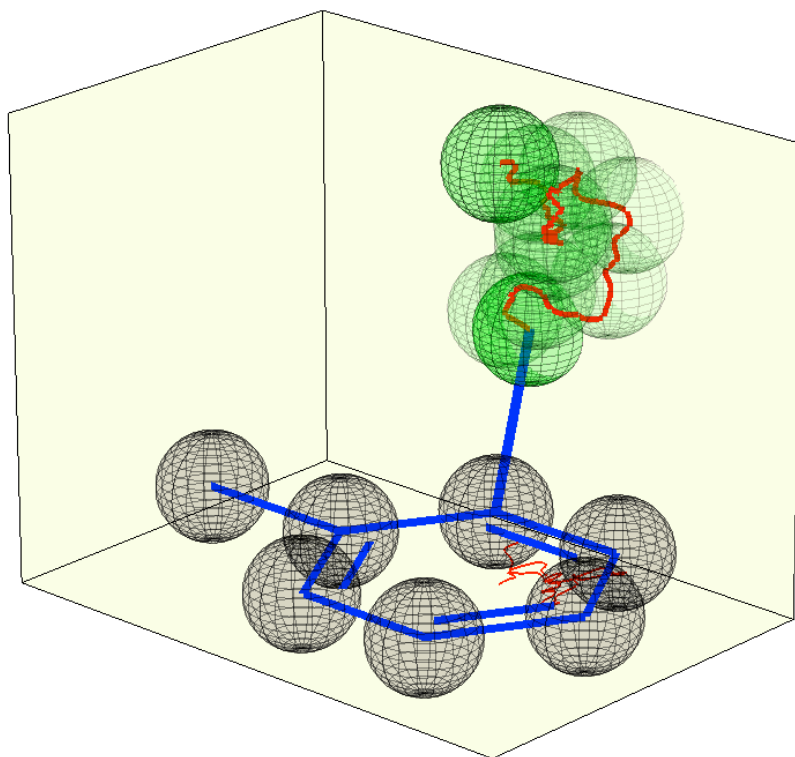

**$\text{NO}_2^+$  with no counterion in Explicit Solvent**

Ipsso product formation is rapid after the nitronium approaches the carbon.

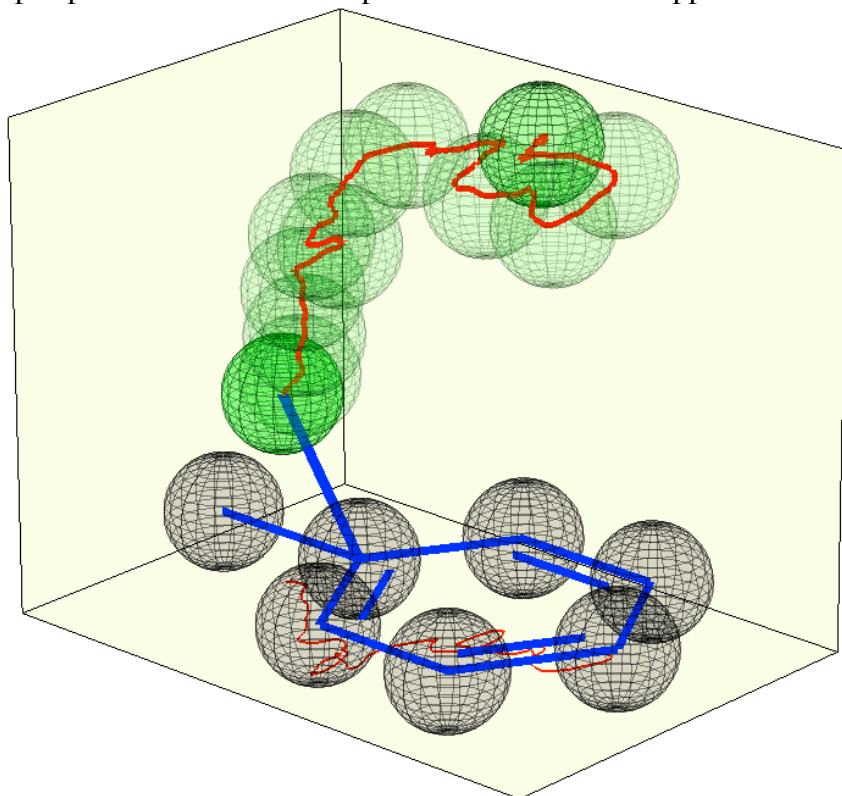

Meta product formation.

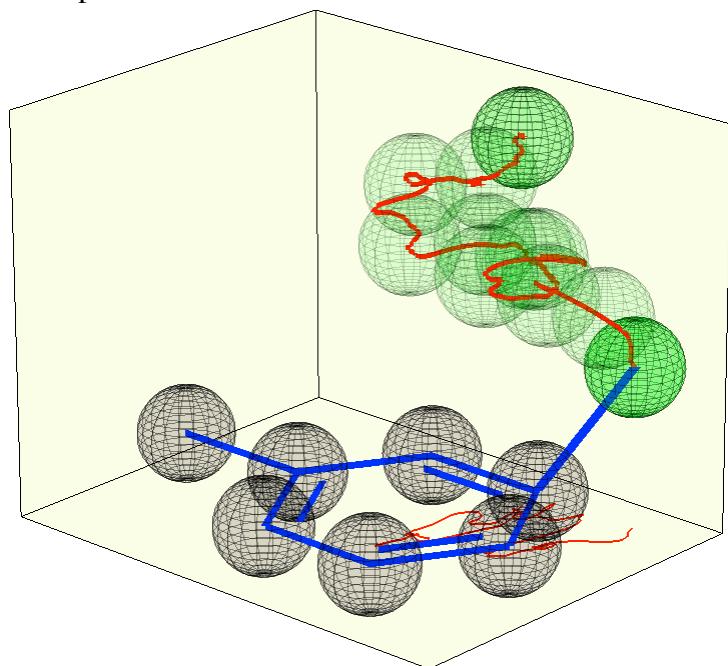

This trajectory shows an exception to the usual rapid descent to product. The nitronium at first approaches the meta carbon to within 1.9 Å, then moves over to the ortho carbon at the end. Such reversal can occur in explicit solvent but they are far less common than when the counterion is present.

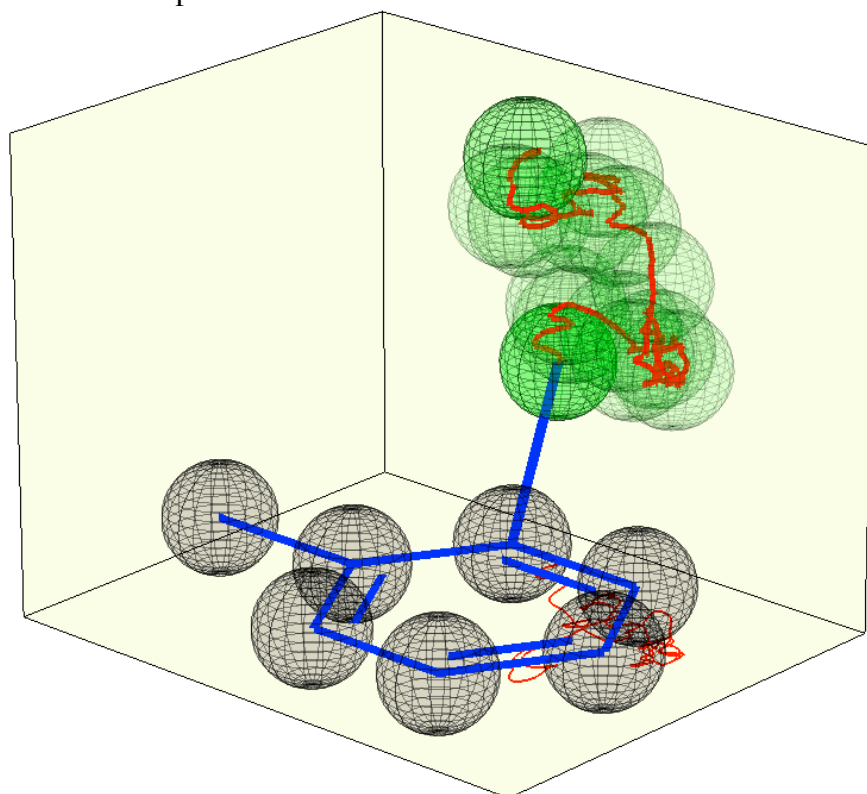

## Results and Selectivity Predictions for Trajectories based on Conventional Transition Structures

### Trajectories for Toluene / NO<sub>2</sub><sup>+</sup> M06-2X/6-311G\*/PCM (CH<sub>2</sub>Cl<sub>2</sub>)

For the five TSs located for the reaction of toluene with NO<sub>2</sub><sup>+</sup> in M06-2X/6-311G\*/PCM(CH<sub>2</sub>Cl<sub>2</sub>) calculations, the table below shows the nominal (Gaussian 09 output, harmonic approximation) thermal free energy, the Boltzmann factor for each structure, the weighting of each structure, the raw trajectory results, trajectory percentages, and weighted percentages that add up to the predicted selectivity. The TSs are labeled by unique code numbers, e.g. 190031) that correspond to the codes that later label their specific geometry later in this document.

The Boltzmann factors have allowed for a factor of 2 for chiral structures relative to the achiral lowest-energy structure.

|           | G (Hartrees) | Erel (kcal/mol) | Boltzmann Factor | Boltzmann weighting |
|-----------|--------------|-----------------|------------------|---------------------|
| TS 190031 | -476.190031  | 0.0             | 1.00             | 0.040               |
| TS 187860 | -476.18786   | 1.4             | 0.20             | 0.008               |
| TS 188821 | -476.188821  | 0.8             | 0.56             | 0.022               |
| TS 189331 | -476.189331  | 0.4             | 0.95             | 0.038               |

|                        |             |       |      |       |
|------------------------|-------------|-------|------|-------|
| TS 189465              | -476.189465 | 0.4   | 1.10 | 0.044 |
| trajectory results raw |             |       |      |       |
|                        | ipso        | ortho | meta | para  |
| TS 190031              | 25          | 6     |      |       |
| TS 187860              |             | 37    | 11   | 1     |
| TS 188821              |             | 58    | 19   |       |
| TS 189331              |             |       | 7    | 55    |
| TS 189465              |             |       | 9    | 72    |
| trajectory percentages |             |       |      |       |
|                        | ipso        | ortho | meta | para  |
| TS 190031              | 0.81        | 0.19  | 0.00 | 0.00  |
| TS 187860              | 0.00        | 0.76  | 0.22 | 0.02  |
| TS 188821              | 0.00        | 0.75  | 0.25 | 0.00  |
| TS 189331              | 0.00        | 0.00  | 0.11 | 0.89  |
| TS 189465              | 0.00        | 0.00  | 0.11 | 0.89  |
| weighted percentages   |             |       |      |       |
|                        | ipso        | ortho | meta | para  |
| TS 190031              | 0.21        | 0.05  | 0.00 | 0.00  |
| TS 187860              | 0.00        | 0.04  | 0.01 | 0.00  |
| TS 188821              | 0.00        | 0.11  | 0.04 | 0.00  |
| TS 189331              | 0.00        | 0.00  | 0.03 | 0.22  |
| TS 189465              | 0.00        | 0.00  | 0.03 | 0.26  |
|                        | ipso        | ortho | meta | para  |
| Selectivity            | 0.21        | 0.20  | 0.11 | 0.48  |

### Trajectories for Toluene / $\text{NO}_2^+\text{BF}_4^-$ M06-2X/6-311G\*/PCM ( $\text{CH}_2\text{Cl}_2$ )

The table below shows the nominal (Gaussian 09 output, harmonic approximation) thermal free energy for the complete set of TSs obtained for the reaction of toluene with  $\text{NO}_2^+\text{BF}_4^-$  in M06-2X/6-311G\*/PCM( $\text{CH}_2\text{Cl}_2$ ) calculations. For those structures where trajectories were run, the table then shows the Boltzmann factor for each structure, the weighting of each structure, the raw trajectory results, trajectory percentages, and weighted percentages that add up to the predicted selectivity. The TSs are labeled by unique code numbers, e.g. 3.440\_824095) that correspond to the codes that later label their specific geometry later in this document.

|                  | G (Hartrees) | Erel (kcal/mol) | Boltzman<br>Factor | Boltzmann<br>weighting |
|------------------|--------------|-----------------|--------------------|------------------------|
| TS 3.440_824095  | -900.824095  | 0.00            | 1.00               | 0.33                   |
| TS 3.4399_824088 | -900.824088  | 0.00            | 0.99               | 0.33                   |

|                  |             |      |      |      |
|------------------|-------------|------|------|------|
| TS 3.440_824085  | -900.824085 | 0.01 | 0.99 | 0.33 |
| TS 3.426_824053  | -900.824053 | 0.03 | 0.96 | 0.32 |
| TS 3.393_822143  | -900.822143 | 1.22 | 0.13 | 0.04 |
| TS 3.3794_822005 | -900.822005 | 1.31 | 0.11 | 0.04 |
| TS 3.332_821966  | -900.821966 | 1.34 | 0.10 | 0.03 |
| TS 2.434_821714  | -900.821714 | 1.49 | 0.08 | 0.03 |
| TS 2.429_821508  | -900.821508 | 1.62 | 0.06 | 0.02 |
| TS 2.4410_821447 | -900.821447 | 1.66 |      |      |
| TS 2.419_821322  | -900.821322 | 1.74 |      |      |
| TS 2.4198_821288 | -900.821288 | 1.76 |      |      |
| TS 2.435_821006  | -900.821006 | 1.94 |      |      |
| TS 2.424_820983  | -900.820983 | 1.95 |      |      |
| TS 2.398_820850  | -900.820850 | 2.04 |      |      |
| TS 2.3272_820767 | -900.820767 | 2.09 |      |      |
| TS 2.387_820745  | -900.820745 | 2.10 |      |      |
| TS 3.444_820739  | -900.820739 | 2.11 |      |      |
| TS 3.1392_820578 | -900.820578 | 2.21 |      |      |
| TS 3.1409_820572 | -900.820572 | 2.21 |      |      |
| TS 3.055_820543  | -900.820543 | 2.23 |      |      |
| TS 2.4184_820386 | -900.820386 | 2.33 |      |      |
| TS 2.306_820365  | -900.820365 | 2.34 |      |      |
| TS 2.2457_820277 | -900.820277 | 2.40 |      |      |
| TS 2.386_820166  | -900.820166 | 2.47 |      |      |
| TS 3.298_819960  | -900.819960 | 2.59 |      |      |
| TS 3.271_819957  | -900.819957 | 2.60 |      |      |
| TS 2.6887_819594 | -900.819594 | 2.82 |      |      |
| TS 2.586_819521  | -900.819521 | 2.87 |      |      |
| TS 2.8006_818867 | -900.818867 | 3.28 |      |      |
| TS 2.801_818858  | -900.818858 | 3.29 |      |      |
| TS 2.8758_818627 | -900.818627 | 3.43 |      |      |
| TS 2.778_818581  | -900.818581 | 3.46 |      |      |
| TS 2.840_818475  | -900.818475 | 3.53 |      |      |
| TS 3.1393_818379 | -900.818379 | 3.59 |      |      |
| TS 3.052_818171  | -900.818171 | 3.72 |      |      |
| TS 2.8774_817851 | -900.817851 | 3.92 |      |      |
| TS 2.776_817301  | -900.817301 | 4.26 |      |      |

---

| trajectory results |      |       |      |      |
|--------------------|------|-------|------|------|
|                    | raw  |       |      |      |
|                    | ipso | ortho | meta | para |
| TS 3.440_824095    | 18   |       |      |      |
| TS 3.4399_824088   | 14   |       |      |      |
| TS 3.440_824085    | 17   | 1     |      |      |

---

|                  |    |    |   |    |
|------------------|----|----|---|----|
| TS 3.426_824053  | 18 | 23 |   |    |
| TS 3.393_822143  | 1  | 31 |   |    |
| TS 3.3794_822005 | 3  | 36 |   |    |
| TS 3.332_821966  | 21 | 2  | 0 | 0  |
| TS 2.434_821714  |    |    | 3 | 43 |
| TS 2.429_821508  |    |    |   | 59 |

  

|                  | trajectory percentages |       |      |      |
|------------------|------------------------|-------|------|------|
|                  | ipso                   | ortho | meta | para |
| TS 3.440_824095  | 1.00                   | 0.00  | 0.00 | 0.00 |
| TS 3.4399_824088 | 1.00                   | 0.00  | 0.00 | 0.00 |
| TS 3.440_824085  | 0.94                   | 0.06  | 0.00 | 0.00 |
| TS 3.426_824053  | 0.44                   | 0.56  | 0.00 | 0.00 |
| TS 3.393_822143  | 0.03                   | 0.97  | 0.00 | 0.00 |
| TS 3.3794_822005 | 0.08                   | 0.92  | 0.00 | 0.00 |
| TS 3.332_821966  | 0.91                   | 0.09  | 0.00 | 0.00 |
| TS 2.434_821714  | 0.00                   | 0.00  | 0.07 | 0.93 |
| TS 2.429_821508  | 0.00                   | 0.00  | 0.00 | 1.00 |

  

|                  | weighted percentages |       |       |      |
|------------------|----------------------|-------|-------|------|
|                  | ipso                 | ortho | meta  | para |
| TS 3.440_824095  | ipso                 | ortho | meta  | para |
| TS 3.4399_824088 | 0.23                 | 0.00  | 0.000 | 0.00 |
| TS 3.440_824085  | 0.22                 | 0.00  | 0.000 | 0.00 |
| TS 3.426_824053  | 0.21                 | 0.01  | 0.000 | 0.00 |
| TS 3.393_822143  | 0.09                 | 0.12  | 0.000 | 0.00 |
| TS 3.3794_822005 | 0.00                 | 0.03  | 0.000 | 0.00 |
| TS 3.332_821966  | 0.00                 | 0.02  | 0.000 | 0.00 |
| TS 2.434_821714  | 0.02                 | 0.00  | 0.000 | 0.00 |
| TS 2.429_821508  | 0.00                 | 0.00  | 0.001 | 0.02 |
| TS 3.440_824095  | 0.00                 | 0.00  | 0.000 | 0.01 |

  

|             | total |       |        |       |
|-------------|-------|-------|--------|-------|
|             | ipso  | ortho | meta   | para  |
| Selectivity | 0.78  | 0.19  | 0.0012 | 0.032 |

### Trajectories for Toluene / $\text{NO}_2^+\text{BF}_4^-$ ONIOM(M06-2X/6-311G\*:PM3)/PCM ( $\text{CH}_2\text{Cl}_2$ )

The table below shows the nominal (Gaussian 09 output, harmonic approximation) thermal free energy for the complete set of TSs and CVTSs obtained for the reaction of toluene with  $\text{NO}_2^+\text{BF}_4^-$  in ONIOM(M06-2X/6-311G\*:PM3)/PCM ( $\text{CH}_2\text{Cl}_2$ ) calculations. For those structures where trajectories were run, the table then shows the raw trajectory results.

As discussed in the main text, the located transition structures were biased for TSs associated with barriers, with attack *para* or *meta* (e.g., **6a**<sup>‡</sup> and **6a**<sup>‡</sup>) over those that face no

barrier. This posed a problem for the prediction of the product ratios from the calculations, because it was impractical to perform an exhaustive search for all of the CVTSs associated with attack ortho or ipso. We assume that approximately the same ensemble of counterion positions that was observed for para and meta attack also exists for ortho or ipso attack, even though the latter cannot be fully accounted for. To approximately allow for all of the possibilities, we choose a series of four structures in which the counterion occupies approximately the same relative position, and we estimated the selectivity based on this limited series. The table below then only shows Boltzmann factors and weightings for those four structures. The weighted percentages were added up to predict the selectivity. It may be argued that this is only a very crude way to estimate the selectivity. A better method to predict the selectivity based on random starting points (described in a previous section) gives roughly the same results.

If the selectivity were predicted based on all low-energy structures for which trajectories were obtained, the prediction would be 4% *ipso*, 6% *ortho*, 17% *meta*, and 69% *para*. This has no effect on any argument in the main text, but it does serve to illustrate the problem with relying too much on located TSs without consideration of what was not located.

The TSs are labeled by unique code numbers, e.g. 3.440\_824095 that correspond to the codes that later label their specific geometry later in this document.

|                | G (Hartrees) | Erel (kcal/mol) | Boltzman<br>Factor | Boltzmann<br>weighting |
|----------------|--------------|-----------------|--------------------|------------------------|
| TS 2.609_94138 | -476.94139   | 0.00            |                    |                        |
| TS 2.998_94130 | -476.9413    | 0.06            | 0.91               | 0.38                   |
| TS 2.706_94118 | -476.941183  | 0.13            | 0.80               | 0.33                   |
| TS 2.612_94115 | -476.941158  | 0.14            |                    |                        |
| TS 2.605_94114 | -476.941143  | 0.15            |                    |                        |
| TS 2.702_94087 | -476.940877  | 0.3             |                    |                        |
| TS 2.742_94075 | -476.940751  | 0.4             |                    |                        |
| TS 2.613_94072 | -476.940723  | 0.4             |                    |                        |
| TS 2.711_94072 | -476.94072   | 0.4             |                    |                        |
| TS 2.613_94064 | -476.940644  | 0.5             |                    |                        |
| TS 2.611_94056 | -476.94056   | 0.5             |                    |                        |
| CVTS 940511    | -476.940511  | 0.6             | 0.39               | 0.16                   |
| TS 2.704_94050 | -476.940501  | 0.6             |                    |                        |
| TS 2.610_94049 | -476.940492  | 0.6             |                    |                        |
| TS 2.693_94047 | -476.940476  | 0.6             |                    |                        |
| TS 2.622_94034 | -476.940348  | 0.7             |                    |                        |
| CVTS 940237    | -476.940237  | 0.7             | 0.30               | 0.12                   |
| TS 2.596_94018 | -476.940182  | 0.8             |                    |                        |
| TS 3.138_94010 | -476.940108  | 0.8             |                    |                        |
| TS 2.678_94009 | -476.940097  | 0.8             |                    |                        |
| TS 2.598_94007 | -476.940072  | 0.8             |                    |                        |
| TS 2.687_93987 | -476.93987   | 1.0             |                    |                        |
| TS 2.776_93985 | -476.939853  | 1.0             |                    |                        |



|                |             |     |
|----------------|-------------|-----|
| TS 2.615_93980 | -476.939809 | 1.0 |
| TS 3.093_93959 | -476.939593 | 1.1 |
| TS 2.607_93956 | -476.939561 | 1.1 |
| TS 2.610_93954 | -476.93954  | 1.2 |
| TS 3.125_93949 | -476.939494 | 1.2 |
| TS 3.130_93946 | -476.939465 | 1.2 |
| TS 2.684_93941 | -476.939419 | 1.2 |
| TS 3.119_93935 | -476.939352 | 1.3 |
| TS 3.092_93920 | -476.9392   | 1.4 |
| TS 2.967_93897 | -476.938974 | 1.5 |
| TS 3.146_93865 | -476.938658 | 1.7 |
| TS 2.609_93861 | -476.938616 | 1.7 |
| TS 3.118_93853 | -476.938536 | 1.8 |
| TS 2.635_93808 | -476.938082 | 2.1 |
| TS 3.139_93772 | -476.937723 | 2.3 |
| TS 3.077_93756 | -476.937563 | 2.4 |
| TS 2.629_93703 | -476.937037 | 2.7 |
| TS 3.182_93693 | -476.936936 | 2.8 |
| TS 3.107_93658 | -476.936587 | 3.0 |
| TS 3.341_93655 | -476.936553 | 3.0 |
| TS 3.099_93449 | -476.934492 | 4.3 |

---

| trajectory results |      |       |      |      |
|--------------------|------|-------|------|------|
| raw                |      |       |      |      |
|                    | ipso | ortho | meta | para |
| TS 2.609_94138     |      |       | 9    | 66   |
| TS 2.998_94130     |      | 62    | 88   | 0    |
| TS 2.706_94118     |      |       | 10   | 67   |
| TS 2.612_94115     |      |       | 5    | 47   |
| TS 2.605_94114     |      |       |      | 42   |
| TS 2.702_94087     |      |       | 8    | 53   |
| TS 2.742_94075     |      |       | 25   | 30   |
| TS 2.613_94072     |      | 1     | 10   | 78   |
| TS 2.711_94072     |      |       | 10   | 71   |
| TS 2.613_94064     |      |       | 11   | 76   |
| TS 2.611_94056     |      |       | 8    | 59   |
| VTS940511          | 37   | 14    |      |      |
| VTS940237          | 4    | 60    |      |      |

---

| trajectory percentages |      |       |      |      |
|------------------------|------|-------|------|------|
|                        | ipso | ortho | meta | para |
| TS 2.609_94138         | 0.00 | 0.00  | 0.12 | 0.88 |
| TS 2.998_94130         | 0.00 | 0.41  | 0.59 | 0.00 |

|                |      |      |      |      |
|----------------|------|------|------|------|
| TS 2.706_94118 | 0.00 | 0.00 | 0.13 | 0.87 |
| TS 2.612_94115 | 0.00 | 0.00 | 0.10 | 0.90 |
| TS 2.605_94114 | 0.00 | 0.00 | 0.00 | 1.00 |
| TS 2.702_94087 | 0.00 | 0.00 | 0.13 | 0.87 |
| TS 2.742_94075 | 0.00 | 0.00 | 0.45 | 0.55 |
| TS 2.613_94072 | 0.00 | 0.01 | 0.11 | 0.88 |
| TS 2.711_94072 | 0.00 | 0.00 | 0.12 | 0.88 |
| TS 2.613_94064 | 0.00 | 0.00 | 0.13 | 0.87 |
| TS 2.611_94056 | 0.00 | 0.00 | 0.12 | 0.88 |
| VTS940511      | 0.73 | 0.27 | 0.00 | 0.00 |
| VTS940237      | 0.06 | 0.94 | 0.00 | 0.00 |

---

| weighted percentages |      |       |       |      |
|----------------------|------|-------|-------|------|
|                      | ipso | ortho | meta  | para |
| TS 2.998_94130       | 0.00 | 0.16  | 0.222 | 0.00 |
| TS 2.706_94118       | 0.00 | 0.00  | 0.043 | 0.29 |
| VTS940511            | 0.12 | 0.05  | 0.000 | 0.00 |
| VTS940237            | 0.01 | 0.12  | 0.000 | 0.00 |

---

| total       |      |       |      |      |
|-------------|------|-------|------|------|
|             | ipso | ortho | meta | para |
| Selectivity | 0.12 | 0.20  | 0.27 | 0.29 |

### Trajectories for Toluene / NO<sub>2</sub><sup>+</sup> / H<sub>2</sub>SO<sub>4</sub> M06-2X/6-311G\*/PCM (ε=109)

The table below shows the nominal (Gaussian 09 output, harmonic approximation) thermal free energy for the complete set of TSs obtained for the reaction of toluene with NO<sub>2</sub><sup>+</sup> / H<sub>2</sub>SO<sub>4</sub> in M06-2X/6-311G\* calculations with a PCM model based on that used in Koleva, G.; Galabov, B.; Hadjieva, B.; Schaefer, H. F.; Schleyer, P. v. R. *Angew. Chem. Int. Ed.* **2015**, *54*, 14123-14127 (ε=109, epsinf=2.016,rsolv=2.5). For those structures where trajectories were run, the table then shows the Boltzmann factor for each structure, the weighting of each structure, the raw trajectory results, trajectory percentages, and weighted percentages that add up to the predicted selectivity. The TSs are labeled by unique code numbers, e.g. 3.45\_370364 that correspond to the codes that later label their specific geometry later in this document.

|                | G (Hartrees) | Erel (kcal/mol) | Boltzman Factor | Boltzmann weighting |
|----------------|--------------|-----------------|-----------------|---------------------|
| TS 3.45_370364 | -1176.370364 | 0.000           | 1.000           | 0.133               |
| TS 3.42_370300 | -1176.370300 | 0.040           | 0.934           | 0.125               |
| TS 3.41_370239 | -1176.370239 | 0.078           | 0.876           | 0.117               |
| TS 3.44_370143 | -1176.370143 | 0.139           | 0.791           | 0.105               |
| TS 3.46_370093 | -1176.370093 | 0.170           | 0.750           | 0.100               |
| TS 3.43_369922 | -1176.369922 | 0.277           | 0.626           | 0.083               |
| TS 3.46_369483 | -1176.369483 | 0.553           | 0.393           | 0.052               |

|                |              |       |       |       |
|----------------|--------------|-------|-------|-------|
| TS 3.46_369466 | -1176.369466 | 0.564 | 0.386 | 0.051 |
| TS 3.41_369431 | -1176.369431 | 0.585 | 0.372 | 0.050 |
| TS 2.46_368778 | -1176.368778 | 0.995 | 0.186 | 0.025 |
| TS 2.46_368547 | -1176.368547 | 1.140 | 0.146 | 0.019 |
| TS 3.45_368434 | -1176.368434 | 1.211 | 0.129 | 0.017 |
| TS 2.45_368346 | -1176.368346 | 1.266 | 0.118 | 0.016 |
| TS 2.44_368221 | -1176.368221 | 1.345 | 0.103 | 0.014 |
| TS 3.42_368199 | -1176.368199 | 1.359 | 0.101 | 0.013 |
| TS 2.43_368154 | -1176.368154 | 1.387 | 0.096 | 0.013 |
| TS 2.50_368101 | -1176.368101 | 1.420 | 0.091 | 0.012 |
| TS 2.45_367948 | -1176.367948 | 1.516 | 0.077 | 0.010 |
| TS 3.47_367776 | -1176.367776 | 1.624 | 0.064 | 0.009 |
| TS 2.45_367760 | -1176.367760 | 1.634 | 0.063 | 0.008 |
| TS 2.47_367357 | -1176.367357 | 1.887 | 0.041 | 0.006 |
| TS 2.47_367350 | -1176.367350 | 1.891 | 0.041 | 0.005 |
| TS 3.27_367301 | -1176.367301 | 1.922 | 0.039 | 0.005 |
| TS 3.08_366987 | -1176.366987 | 2.119 | 0.028 | 0.004 |
| TS 3.32_366879 | -1176.366879 | 2.187 | 0.025 | 0.003 |
| TS 3.34_366676 | -1176.366676 | 2.314 | 0.020 | 0.003 |
| TS 2.48_366653 | -1176.366653 | 2.329 |       |       |
| TS 3.33_365619 | -1176.365619 | 2.978 |       |       |

## trajectory results raw

|                | ipso | ortho | meta | para |
|----------------|------|-------|------|------|
| TS 3.45_370364 | 13   | 21    |      |      |
| TS 3.42_370300 | 6    | 32    |      |      |
| TS 3.41_370239 | 3    | 35    |      |      |
| TS 3.44_370143 | 5    | 34    |      |      |
| TS 3.46_370093 | 8    | 23    |      |      |
| TS 3.43_369922 | 5    | 29    |      |      |
| TS 3.46_369483 | 23   | 3     |      |      |
| TS 3.46_369466 | 19   | 2     |      |      |
| TS 3.41_369431 | 2    | 36    |      |      |
| TS 2.46_368778 |      |       | 2    | 44   |
| TS 2.46_368547 |      |       | 8    | 32   |
| TS 3.45_368434 | 8    | 33    |      |      |
| TS 2.45_368346 |      |       | 1    | 47   |
| TS 2.44_368221 |      |       | 2    | 62   |
| TS 3.42_368199 | 5    | 22    |      |      |
| TS 2.43_368154 |      |       |      | 55   |
| TS 2.50_368101 |      |       | 2    | 53   |
| TS 2.45_367948 |      |       | 8    | 39   |
| TS 3.47_367776 | 51   | 2     |      |      |

|                |    |   |    |
|----------------|----|---|----|
| TS 2.45_367760 |    | 5 | 47 |
| TS 2.47_367357 |    | 4 | 38 |
| TS 2.47_367350 |    |   | 34 |
| TS 3.27_367301 | 48 |   |    |
| TS 3.08_366987 | 21 | 5 |    |
| TS 3.32_366879 | 48 |   |    |
| TS 3.34_366676 | 77 |   |    |

trajectory  
percentages

|                | ipso  | ortho | meta  | para  |
|----------------|-------|-------|-------|-------|
| TS 3.45_370364 | 0.382 | 0.618 | 0.000 | 0.000 |
| TS 3.42_370300 | 0.158 | 0.842 | 0.000 | 0.000 |
| TS 3.41_370239 | 0.079 | 0.921 | 0.000 | 0.000 |
| TS 3.44_370143 | 0.128 | 0.872 | 0.000 | 0.000 |
| TS 3.46_370093 | 0.258 | 0.742 | 0.000 | 0.000 |
| TS 3.43_369922 | 0.147 | 0.853 | 0.000 | 0.000 |
| TS 3.46_369483 | 0.885 | 0.115 | 0.000 | 0.000 |
| TS 3.46_369466 | 0.905 | 0.095 | 0.000 | 0.000 |
| TS 3.41_369431 | 0.053 | 0.947 | 0.000 | 0.000 |
| TS 2.46_368778 | 0.000 | 0.000 | 0.043 | 0.957 |
| TS 2.46_368547 | 0.000 | 0.000 | 0.200 | 0.800 |
| TS 3.45_368434 | 0.195 | 0.805 | 0.000 | 0.000 |
| TS 2.45_368346 | 0.000 | 0.000 | 0.021 | 0.979 |
| TS 2.44_368221 | 0.000 | 0.000 | 0.031 | 0.969 |
| TS 3.42_368199 | 0.185 | 0.815 | 0.000 | 0.000 |
| TS 2.43_368154 | 0.000 | 0.000 | 0.000 | 1.000 |
| TS 2.50_368101 | 0.000 | 0.000 | 0.036 | 0.964 |
| TS 2.45_367948 | 0.000 | 0.000 | 0.170 | 0.830 |
| TS 3.47_367776 | 0.962 | 0.038 | 0.000 | 0.000 |
| TS 2.45_367760 | 0.000 | 0.000 | 0.096 | 0.904 |
| TS 2.47_367357 | 0.000 | 0.000 | 0.095 | 0.905 |
| TS 2.47_367350 | 0.000 | 0.000 | 0.000 | 1.000 |
| TS 3.27_367301 | 0.000 | 1.000 | 0.000 | 0.000 |
| TS 3.08_366987 | 0.000 | 0.808 | 0.192 | 0.000 |
| TS 3.32_366879 | 0.000 | 1.000 | 0.000 | 0.000 |
| TS 3.34_366676 | 0.000 | 1.000 | 0.000 | 0.000 |

weighted  
percentages

|                | ipso  | ortho | meta  | para  |
|----------------|-------|-------|-------|-------|
| TS 3.45_370364 | 0.051 | 0.082 | 0.000 | 0.000 |
| TS 3.42_370300 | 0.020 | 0.105 | 0.000 | 0.000 |
| TS 3.41_370239 | 0.009 | 0.108 | 0.000 | 0.000 |

|                |       |       |        |       |
|----------------|-------|-------|--------|-------|
| TS 3.44_370143 | 0.014 | 0.092 | 0.000  | 0.000 |
| TS 3.46_370093 | 0.026 | 0.074 | 0.000  | 0.000 |
| TS 3.43_369922 | 0.012 | 0.071 | 0.000  | 0.000 |
| TS 3.46_369483 | 0.046 | 0.006 | 0.000  | 0.000 |
| TS 3.46_369466 | 0.047 | 0.005 | 0.000  | 0.000 |
| TS 3.41_369431 | 0.003 | 0.047 | 0.000  | 0.000 |
| TS 2.46_368778 | 0.000 | 0.000 | 0.001  | 0.024 |
| TS 2.46_368547 | 0.000 | 0.000 | 0.004  | 0.016 |
| TS 3.45_368434 | 0.003 | 0.014 | 0.000  | 0.000 |
| TS 2.45_368346 | 0.000 | 0.000 | 0.000  | 0.015 |
| TS 2.44_368221 | 0.000 | 0.000 | 0.000  | 0.013 |
| TS 3.42_368199 | 0.002 | 0.011 | 0.000  | 0.000 |
| TS 2.43_368154 | 0.000 | 0.000 | 0.000  | 0.013 |
| TS 2.50_368101 | 0.000 | 0.000 | 0.000  | 0.012 |
| TS 2.45_367948 | 0.000 | 0.000 | 0.002  | 0.009 |
| TS 3.47_367776 | 0.008 | 0.000 | 0.000  | 0.000 |
| TS 2.45_367760 | 0.000 | 0.000 | 0.001  | 0.008 |
| TS 2.47_367357 | 0.000 | 0.000 | 0.001  | 0.005 |
| TS 2.47_367350 | 0.000 | 0.000 | 0.000  | 0.005 |
| TS 3.27_367301 | 0.000 | 0.005 | 0.000  | 0.000 |
| TS 3.08_366987 | 0.000 | 0.003 | 0.001  | 0.000 |
| TS 3.32_366879 | 0.000 | 0.003 | 0.000  | 0.000 |
| TS 3.34_366676 | 0.000 | 0.003 | 0.000  | 0.000 |
|                | total |       |        |       |
|                | ipso  | ortho | meta   | para  |
|                | 0.241 | 0.630 | 0.0100 | 0.119 |

## Programs for Calculations

### Program Suite PROGDYN

A full listing of the subprograms of PROGDYN is given below. To allow the reader to understand or make use of PROGDYN, we describe here first the overall structure of the program. We also list and describe in this section a number of helper programs that were used to analyze the data from the trajectory calculations.

The master control program for dynamics, in the form of a Unix Shell Script, is called *progdynstarterHP*. For a user to start to use *progdynstarterHP*, some early lines in it that assign the scratch space and the location of the program files and input files would have to be modified for the local environment. These lines are between lines 45 and 55 and should be apparent. The location of the scratch space is usually passed to *progdynstarterHP* as a parameter.

*progdynstarterHP* takes as input files:

- freqinHP* - This is the standard output from a Gaussian 98, 03, or 09 frequency calculation using `freq=hpmodes`. For isotopically labeled compounds, use `freq=(hpmodes.readisotopes)`.
- progdyn.conf* - This is a file giving a variety of configuration options, called on by many of the subprograms. *progdyn.conf* examples are listed below and contains explanations of the program options.
- isomernumber* - A number in file *isomernumber* provides a start for numbering runs. The default is 1.
- detour* - A signal file that, by existing, signals the program to do a side calculations
- nogo* - A signal file that, by existing, signals the program to stop between points
- bypassprogen* - A signal file that, by existing, signals the program to use a supplied input file *geoPlusVel* instead of generating one for itself. This pathway for initialization is important here because it is used when the program *progdynsam*, described later, is used to generate the *geoPlusVel* file.
- methodfile* - A file that contains lines to be added to the end of each *g09.com* input file, such as lines that call for an NMR calculation
- ZMAT* - An input file for the CFOUR (<http://www.cfour.de>) suite of programs. When *ZMAT* is supplied, *progdynstarterHP* will automatically run call CFOUR (which must be set up independently by the user) by making use of the script *progcfour*.
- cannontraj* - A file containing a vector for each atom, used to fire an initial geometry in a particular direction.

*progdynstarterHP* calls the following programs:

- progenHP* - An awk program that starts a trajectory, giving each mode its zero point energy (if a quasiclassical calculation) plus random additional excitations depending on the temperature.
- prog1stpoint* - Awk program that creates the first Gaussian input file for each run
- prog2ndpoint* - Awk program that creates the second Gaussian input file for each run. *prog2ndpoint* also checks the energy of the first point to see if it fits with the desired energy, and aborts the run if it does not by creating appropriate output in file *Echeck*
- progdynb* - Creates subsequent Gaussian input files until run is completed, written in awk
- proganal* - A program to analyze the latest point and see if a run is done. This program must be redone for each new system. Elaborate changes are sometimes programmed into *proganal*, such as the automatic changing of configuration variables. *proganal* creates the output to *dynfollowfile* and *NMRLlist* or *NMRLlistdis*
- randgen* - A program that generates random numbers between 0 and 1. These are generated all at once and stored in a file for use by *progenHP*.
- progcfour* - A control script to run CFOUR calculations (not needed for most kinds of runs).

*progdynstarterHP* has the following output files:

- isomernumber* - A running tab of the trajectory number
- runpointnumber* - a running tab of the point in the trajectory
- Echeck* - output form where *prog2ndpoint* checks the energy of the trajectory to see if it fits with the desired energy
- geoRecord* - A record of all of the *geoPlusVel* files.
- geoPlusVel* - Created by *progen*, this gives the starting positions, velocities, isotopic masses, excitations of the normal modes, and initial displacements of the normal modes for current run.
- g09.com* - Created by *prog1stpoint*, *prog2ndpoint*, and *progdynb*, this is the latest input file for Gaussian09 for current run and latest point.
- olddynrun*, *olddynrun2*, *olddynrun3* - files containing the last three outputs from Gaussian, for creation of the next point

*traj, traj1, traj2, traj3, etc.* – files containing the geometries and energies for each trajectory, numbered by the isomernumber, in a format suitable for reading by Molden.

*dynfollowfile* – A short record of the runs and their results. The data desired for *dynfollowfile* must be programmed into the script *proganal* as needed for each system studied.

*NMRList* or *NMRListdis* – output of NMR predictions at each point in a trajectory, when desired

*skipstart* - A signal file that, by existing, tells progdynstarterHP that we are in the middle of a run. For trajectories that are propagated forward and backward in time, skipstart keeps track of whether one is in the forward or reverse part.

*diagnostics* – optional output that follows which subprograms are running and configuration variables, decided by variable in progdyn.conf

*vellist* – optional output that lists the velocities of each atom, decided by variable in progdyn.conf, or lists the total kinetic energy in the system and the classical temperature, often also keeps track of the density

A number of files starting with '*temp*' are created then later erased.

The following helper programs were used for the current study.

*progdynsam* – an awk program that generates a geoPlusVel file based on input from a *traj* file. Typically, the *traj* file is a trajectory performed with constraints, and the new geoPlusVel will be started without constraints. *progdynsam* must be modified for the desired temperature, and it takes as input the variable *pt* to decide which points in the *traj* file are used to define the geoPlusVel. For previously constrained atoms, *progdynsam* gives the atoms a Boltzmann-random velocity and direction of motion appropriate for the desired temperature. The program is invoked with `awk -v pt=## -f progdynsam traj` where *##* is the trajectory point used to start a new geoPlusVel, and *traj* is the output file from above containing the list of trajectory points.

*proghere* – an awk program used to analyze the output data in *dynfollowfile*. It is invoked with `awk -f proghere dynfollowfile` where *dynfollowfile* is a list of one or more of the *dynfollowfile* output files described above.

*whamnit* – a shell script that extracts data from the *dynfollowfile* files, sets up and runs wham to calculate the PMF, and keeps track of some general aspects of trajectories

*progeries* – an AWK script used by whamnit to extract data from the *dynfollowfile* files

*wham* – a program from Grossfield, Alan, "WHAM: the weighted histogram analysis method", version 2.0.9, <http://membrane.urmc.rochester.edu/content/wham> that performs the wham analysis

*prog3dpath* – a program that takes the output from *dynfollowfile* and generates the data for a 3d path relative to the average position of the arene carbons, used for generating the the pictures in Figure 2 of the paper.

*nitrationPara1.m* – This is an example of the Matlab version 2014 b code that was used to generate along with the data from *prog3dpath* to generate the Figures in Figure 2.

## Program progdynstarterHP

```
#!/bin/bash
#progdynstarterHP, made to use high-precision modes from Gaussian output with freq=hpmodes
#updated to create a random number file temp811 that is used by progenHP
#version September 16, 2005, made for workstations
#version August 2007 to allow periodic copying of g09.log to dyn putting it under control of progdynb
#version Feb 2008 moves variables like the scratch directory and location of randgen to the beginning
#version March 2008 added proganal reporting to points 1 and 2
#version Jan 2009 fixed bug generator of having proganal run twice in checking for complete runs
#version May 2009 Echeck catches bad energies after only one point, other lines written simpler, triple while loop, revised
comments
#version Aug 2010 isomernumber adds words to ease parsing, increased elements up to bromine, runpointnumber checked for
more appropriate restarts
#version Aug 2011 runpointnumber starts better, restart better if died during first few points, awk bug fix
#version Aug 2012 freqinHP reads with only 3 freqs, goingwell and other temp files moved to $scratchdir
#version Aug 2013 adds ability to automatically run a CFOUR program if the file ZMAT exists
#
#version Nov 2013 adds ability to bypass generation of geoPlusVel using the signal file bypassprogen
#version Nov 2015 makes using guess=read easier, improves ability to restart after disk write failures, partially allows for MM
runs in Gaussian
#LIMITATIONS - standard version only handles elements up to bromine, must change program to do higher atomic numbers
# only handles up to 4000th excited state for modes - this could start to affect the initialization of classical modes or transition
vectors at
# extremely high temperatures
# The routine that checks whether the actual energy approximately equals the desired energy checks for lines containing "SCF
```

```

Done" or "EUMP2 =" or " Energy="
# This should handle ordinary calculations HF, DFT, ONIOM, and MP2 calculatons but the routine in prog2ndpoint would have
# to be changed for other calcs.
#
#                               OUTLINE
# A. initalize to perform Gaussian jobs, set the scratch, program, and other directores, remove errant control files
# start outermost loop L1L1L1L1L1L1L1L1L1
# start loop 2 L2L2L2L2L2L2L2L2L2L2
# B. branch on whether there is a file named "skipstart"
# if there is, skip B1, B2, B3 entirely
# if no file named "skipstart" then generate a new isomer. Instructions: Get rid of skipstart to start new isomer.
# the B loop generates geoPlusVel, adds it to geoRecord, generates and runs first and second points, and sets up for continuous
loop
# B1. generates geoPlusVel, isomernumber, runpointnumber=1, then makes g09.com for point 1
# B2. checks for success of B1 or exits, then sets geoRecord then runs g09.com. Checks for its success or exits.
# B3. runpointnumber=2, kills run if XXXX in dynfollowfile due to bad energy probably, makes g09.com for point 2, runs it
# checks for its success or exits
# runpointnumber=3, uses progdynb to make g09.com for point 3
# sets skipstart=forward
# B4. Only runs if skipstart=ireverserestart, performs reverserestart, ends with runpointnumber=3
# sets skipstart=reverse
# C. loop over propagation steps
#
#
AAAAAAAAAAAAAAAAAAAAAAAAAAAAAAAAAAAAAAAAAAAAAAAAAAAAAAAAAAAAAAAAAAAAAAAAAAAAAAAAAAAAAAAAAAAAAAAAAAAAAAAAAAAA
AAAAAAAAAAAAAAAAAAAAAAAAAAAAAAAAAAAAAAAAAAAAAAAAAAAAAAAAAAAAAAAAAAAAAAAAAAAAAAAAAAAAAAAAAAAAAAAAAAAAAAAAAAAA
AAAA
#
AAAAAAAAAAAAAAAAAAAAAAAAAAAAAAAAAAAAAAAAAAAAAAAAAAAAAAAAAAAAAAAAAAAAAAAAAAAAAAAAAAAAAAAAAAAAAAAAAAAAAAAAAAAA
AAAAAAAAAAAAAAAAAAAAAAAAAAAAAAAAAAAAAAAAAAAAAAAAAAAAAAAAAAAAAAAAAAAAAAAAAAAAAAAAAAAAAAAAAAAAAAAAAAAAAAAAAAAA
AAAA
#
AAAAAAAAAAAAAAAAAAAAAAAAAAAAAAAAAAAAAAAAAAAAAAAAAAAAAAAAAAAAAAAAAAAAAAAAAAAAAAAAAAAAAAAAAAAAAAAAAAAAAAAAAAAA
AAAAAAAAAAAAAAAAAAAAAAAAAAAAAAAAAAAAAAAAAAAAAAAAAAAAAAAAAAAAAAAAAAAAAAAAAAAAAAAAAAAAAAAAAAAAAAAAAAAAAAAAAAAA
AAAA
#origdir, randdir, scratchdir, g09root, logfile all may need varied from system to system and assigned here or by program calling
this one
export LC_ALL=C
echo $1
scratchdir=$1
export g09root=/software/lms/g09_D01
. $g09root/g09/bsd/g09.profile
origdir=`pwd`
cd $origdir
logfile=docslog
randdir=~/.bin
programdir=~/.binall500
freqfile=~/.binall500/freqinHP
echo
echo ORIGDIR at the beginning of run:
echo $origdir
ls $origdir
echo
echo SCRATCHDIR at the beginning of run:
echo $scratchdir
ls $scratchdir
echo
echo PROGRAMDIR at the beginning of run::
echo $programdir
ls $programdir

rm -f nogo # assume that if someone is starting a job, they want it to go.

```







```

#
B4B4B4B4B4B4B4B4B4B4B4B4B4B4B4B4B4B4B4B4B4B4B4B4B4B4B4B4B4B4B4B4B4B4B4B4B4B4B4B4B4B4B4B4B4B4B4B4B4B4
B4B4B4B4B4B4B4B4B4B4B4B4B4B4B4B4B4B4B4B4B4B4B4B4B4B4B4B4B4B4B4B4B4B4B4B4B4B4B4B4B4B4B4B4B4B4B4B4
# Reverse trajectories starter routine
if [ `cat skipstart` = "reverserestart" ]; then
  cd $origdir
  rm g09.com
  echo 1 > runpointnumber
  awk -f $programdir/prog1stpoint isomernumber > g09.com
  if (test -s g09.com) then
    rm -f $scratchdir/goingwell
    cd $scratchdir
    cp $origdir/g09.com $scratchdir/g09.com
    $g09root/g09/g09 $scratchdir/g09.com > $scratchdir/g09.log
    cd $origdir
    grep 'Normal termination' $scratchdir/g09.log > $scratchdir/goingwell
    if (test -s $scratchdir/goingwell) then
      cp $scratchdir/g09.log olddynrun2
    else
      cp $scratchdir/g09.log $origdir/g09.log
      break
    fi
  else
    break
  fi
  rm g09.com
  echo 2 > runpointnumber
  awk -f $programdir/prog2ndpoint $scratchdir/g09.log > g09.com
  awk -f $programdir/proganal $scratchdir/g09.log >> dynfollowfile
  rm -f $scratchdir/tempdone
  if (test -s g09.com) then
    rm -f $scratchdir/goingwell
    cd $scratchdir
    cp $origdir/g09.com $scratchdir/g09.com
    $g09root/g09/g09 $scratchdir/g09.com > $scratchdir/g09.log
    cd $origdir
    grep 'Normal termination' $scratchdir/g09.log > $scratchdir/goingwell
    if (test -s $scratchdir/goingwell) then
      cp $scratchdir/g09.log olddynrun
      cat $scratchdir/g09.log >> dyn
      awk -f $programdir/proganal $scratchdir/g09.log >> dynfollowfile
      awk '/Input orientation/./Distance matrix/ {print};/Matrix orientation/./Stoichiometry/ {print}' olddynrun | awk '{if
(($2>.5) && ($2<100)) print}' > old
      awk '/Input orientation/./Distance matrix/ {print};/Matrix orientation/./Stoichiometry/ {print}' olddynrun2 | awk '{if
(($2>.5) && ($2<100)) print}' > older
      echo 3 > runpointnumber
      if (test -f bypassprogen) then
        cat bypassprogen > runpointnumber
      fi
      awk -f $programdir/progdynb olddynrun > g09.com
      rm -f old older
    else
      cp $scratchdir/g09.log $origdir/g09.log
      break
    fi
  else
    break
  fi
# we've just completed a reverserestart, so lets skipstart until instructed otherwise
echo "reverse" > skipstart
fi

```

```

# END_of_B__END_of_B__END_of_B__END_of_B__END_of_B__END_of_B__END_of_B__END_of_B__

# CCCCCCCCCCCCCCCCCCCCCCCCCCCCCCCCCCCCCCCCCCCCCCCCCCCCCCCCCCCCCCCCCCCCCCCCCCCCCCCC propagation loop
while (true)
do
  rm -f $scratchdir/goingwell
  cd $scratchdir
  cp $origdir/g09.com $scratchdir/g09.com
  $g09root/g09/g09 $scratchdir/g09.com > $scratchdir/g09.log
  cd $origdir
  grep 'Normal termination' $scratchdir/g09.log > $scratchdir/goingwell
  if (test -s $scratchdir/goingwell) then
    awk -f $programdir/proganal $scratchdir/g09.log >> $origdir/dynfollowfile
    mv olddynrun2 olddynrun3
    mv olddynrun olddynrun2
    awk '/Input orientation/,/Distance matrix/ {print};/Matrix orientation/,/Stoichiometry/ {print}' $scratchdir/g09.log | awk '{if
(($2>.5) && ($2<100)) print}' > old
    cp $scratchdir/g09.log olddynrun
    awk '/Input orientation/,/Distance matrix/ {print};/Matrix orientation/,/Stoichiometry/ {print}' olddynrun2 | awk '{if
(($2>.5) && ($2<100)) print}' > older
    #increment runpointnumber
    cp runpointnumber $scratchdir/temp533
    awk 'BEGIN {getline;i=$1+1;print i}' $scratchdir/temp533 > runpointnumber
    rm $scratchdir/temp533
    awk -f $programdir/progdynb $scratchdir/g09.log > g09.com
    rm -f old older
  else
    cp $scratchdir/g09.log $origdir/g09.log
    break
  fi
# kludge to do a side calculation of NMR using progcfour. If ZMAT is there then it gets ran and renamed.
# creation of ZMAT is under the control of progdynb, which is controlled by keyword NMRcc in progdyn.conf
# decisions to be made: erase ZMAT at beginning? what to do if cfour calc dies?
  if (test -f ZMAT) then
    cp ZMAT $scratchdir
    cd $scratchdir
    $scratchdir/progcfour $origdir $scratchdir
    cd $origdir
    mv ZMAT temp.ZMAT
    echo "generic one two three" `cat runpointnumber` "runisomer" `cat isomernumber` >> NMRlistcc
    awk '/Nuclear Magnetic Resonance/,/HF-SCF/ {if ($2=="C") print $1,$2,"Isotropic =" , $3; if ($2=="H") print
$1,$2,"Isotropic =" , $3}' x.log >> NMRlistcc
  fi
# here is a cool link that lets you interrupt the dynamics with a short job, then
# it automatically goes back to the dynamics just make the file 'detour' and it
# will delete detour, run run.com, then go back to dynamics
  if (test -f detour) then
    rm detour
    date >> $logfile
    cat run.com >> $logfile
    cp run.log temp.log
    cd $scratchdir
    $g09root/g09/g09 $origdir/run.com > $origdir/run.log
    cd $origdir
  fi
#stop it all nicely by creating a nogo file
  if (test -f nogo) then
    break
  fi

```

```

#figure out if this isomer is done - change in april 2013 is to move proganal call up from here
rm -f $scratchdir/tempdone
tail -2 dynfollowfile | awk '/XXXX/ {print}' > $scratchdir/tempdone
if (test -s $scratchdir/tempdone) then
  if [ `cat /reversetraj/ {if ($1=="reversetraj") print $2}' progdyn.conf` = "true" ]; then
    if [ `cat skipstart` = "reverse" ]; then
      rm -f skipstart
      rm -f geoPlusVel
      rm -f olddynrun
      rm -f olddynrun2
      rm -f olddynrun3
      a=`awk '{print $1}' isomernumber`
      mv traj traj$a
    fi
    if [ `cat skipstart` = "forward" ]; then
      echo reverserestart > skipstart
    fi
  else
    rm -f skipstart
    rm -f geoPlusVel
    rm -f olddynrun
    rm -f olddynrun2
    rm -f olddynrun3
    a=`awk '{print $1}' isomernumber`
    mv traj traj$a
  fi
  break
fi
done
#
END_of_C_Loop____END_of_C_Loop____END_of_C_Loop____END_of_C_Loop____END_of_C_Loop____END_of_C_L
oop____

# We've got to break a second time to get out of this loop
# if we really want to quit. Otherwise, it will start over
# at the top
if (test -f nogo) then
  break
fi
if (test -s $scratchdir/goingwell) then
  echo "starting a new point or a new direction"
else
  break
fi
done

if (test -f nogo) then
  break
fi
if (test -s $scratchdir/goingwell) then
  echo "starting a new point or a new direction2"
else
  break
fi
done
exit 0

```

## Program proggenHP

```

BEGIN {
# 2014 - avoids bug with a box on, so that starts without modes use input geometry, not standard orientation
# aug 2013 summary of changes

```

```

#include molecular rotation, ability to do multiple NMR calculations, ONIOM with link atoms,
#nonstandard routes, handling of linear molecules using geometry linear, fixed but with atoms over 99 but
#bug varies with version of Gaussian, randomization based on PROCINFO (solved many problems), added initialDis 3 for
random
#phase of normal modes
# Aut 2010 changes classicalSpacing to 2 and upped possible excited states to 4000
# Jan 2009 - a number of little changes to improve reporting, precision, etc, specification of displacement on particular modes
# Jan 2009 cannonball trajectories. adds desired energy to initial velocities based on file cannontraj, so one can shoot toward a ts
# updated Nov 2008 to incorporate running DRPs
# updated Nov 2008 to allow for start without an initial freq calc using classical = 2
# updated Aug 2008 added to atom list to handle a large number of atoms without changes needed
# updated June 2008 to incorporate new method for choosing displacements with initialdis 2
# updated Jan 17 2008 - bug fix for > 99 atoms, 300 excitations of low modes possible
# version August 2007 - incorporates classical trajectory calculation option
#also allows listing of number of imaginary frequencies
# version Sept 16, 2005 - incorporates searchdir but not yet rotation
# now reads random numbers from temp811, starting at a random place
# The input files are generated before this and are tempfreqs, tempredmass,
# tempfr, tempmodes, and tempstangeos.
# It will count the number of atoms.

# default parameters, including quassiclassical, no displacements, transition state, not a DRP
# do not change these - rather, change progdyn.conf to set the parameters
initialDis=0; timestep=1E-15; scaling=1.0; temp=298.15
classical=0; numimag=1; DRP=0; cannonball=0
charge=0; multiplicity=1; method="HF/3-21G"; memory=20000000
diag=1; checkpoint="g09.chk"; searchdir="positive"; boxon=0
boxsize=10; maxAtomMove=0.1; title1="you"; title2="need"
title3="a"; title4="progdyn.conf"; processors=1; highlevel=999
conver1=4.184E26 #dividing by this converts amu ang^2 /s^2 to kcal/mol
geometry="nonlinear";rotationmode=0

#initialization and constants
for (i=1;i<=10000;i++) {disMode[i]=-1}
i=1;j=1;k=1
c=29979245800; h=6.626075E-34; avNum=6.0221415E23
RgasK=0.00198588; RgasJ=8.31447
numAtoms=0; atomnumber=0; classicalSpacing=2
zpeGauss=0; zpeGaussK=0; zpePlusE=0; potentialE=0

# read progdyn.conf for configuration info
blankLineTester=10
while (blankLineTester>1) {
  getline < "progdyn.conf"
  if ($1=="method") method=$2
  if ($1=="charge") charge=$2
  if ($1=="multiplicity") multiplicity=$2
  if ($1=="memory") memory=$2
  if ($1=="processors") processors=$2
  if ($1=="checkpoint") checkpoint=$2
  if ($1=="diagnostics") diag=$2
  if ($1=="initialdis") initialDis=$2
  if ($1=="timestep") timestep=$2
  if ($1=="scaling") scaling=$2
  if ($1=="temperature") temp=$2
  if ($1=="searchdir") searchdir=$2
  if ($1=="classical") classical=$2
  if ($1=="numimag") numimag=$2
  if ($1=="geometry") geometry=$2
  if ($1=="highlevel") highlevel=$2
  if ($1=="boxon") boxon=$2
  if ($1=="boxsize") boxsize=$2
}

```

```

if ($1=="DRP") DRP=$2; if (DRP==1) classical=2 #this lets one start a DRP from a point that is not a freq calc
if ($1=="maxAtomMove") maxAtomMove=$2
if ($1=="cannonball") cannonball=$2
if ($1=="displacements") disMode[$2]=$3
if ($1=="controlphase") controlPhase[$2]=$3
if ($1=="rotationmode") rotationmode=$2
if ($1=="title") {
  title1=$2
  title2=$3
  title3=$4
  title4=$5
}
blankLineTester=length($0)
}

if (diag>=1) print "***** starting proggen *****" >> "diagnostics"
if (diag>=1) print "method,charge,multiplicity,memory" >> "diagnostics"
if (diag>=1) print method,charge,multiplicity,memory >> "diagnostics"
if (diag>=1) print "processors,checkpoint,title,initialdis,timestep,scaling,temperature" >> "diagnostics"
if (diag>=1) print processors,checkpoint,title1,title2,title3,title4,initialDis,timestep,scaling,temp >> "diagnostics"
if (diag>=1) print "classical,numimag,highlevel,boxon,boxsize,DRP,maxAtomMove,cannonball" >> "diagnostics"
if (diag>=1) print classical,numimag,highlevel,boxon,boxsize,DRP,maxAtomMove,cannonball >> "diagnostics"

# put geometries into array, also figure out number of atoms
# note that this picks out the last geometry in a file, assuming
# that if there is an optimization followed by a freq, nothing else follows
# kludgy - repeats last line twice - must be a better way
do {
  getline < "tempstangeos"
  if (oldline==$0) $0=""
  oldline=$0
  atom = $1
  if (atom>numAtoms) numAtoms=atom
  atNum[atom]=$2
  geoArr[atom,1]=$4; geoArr[atom,2]=$5; geoArr[atom,3]=$6
  geoArrOrig[atom,1]=$4; geoArrOrig[atom,2]=$5; geoArrOrig[atom,3]=$6
  velArr[atom,1]=0; velArr[atom,2]=0; velArr[atom,3]=0
}
while (length($0) > 0)

#output the number of atoms, used in many routines
print numAtoms

# put in atomic symbols and atomic weights - assigns a default mass but then reads it from tempmasses when possible
for (i=1;i<=numAtoms;i++) {
  getline < "tempmasses"
  if (atNum[i]==1) {atSym[i]="H";atWeight[i]=1.00783}
  if (atNum[i]==2) {atSym[i]="He";atWeight[i]=4.0026}
  if (atNum[i]==3) {atSym[i]="Li";atWeight[i]=6.941}
  if (atNum[i]==4) {atSym[i]="Be";atWeight[i]=9.012}
  if (atNum[i]==5) {atSym[i]="B";atWeight[i]=10.811}
  if (atNum[i]==6) {atSym[i]="C";atWeight[i]=12.}
  if (atNum[i]==7) {atSym[i]="N";atWeight[i]=14.007}
  if (atNum[i]==8) {atSym[i]="O";atWeight[i]=15.9994}
  if (atNum[i]==9) {atSym[i]="F";atWeight[i]=18.9984}
  if (atNum[i]==10) {atSym[i]="Ne";atWeight[i]=20.1797}
  if (atNum[i]==11) {atSym[i]="Na";atWeight[i]=22.989}
  if (atNum[i]==12) {atSym[i]="Mg";atWeight[i]=24.305}
  if (atNum[i]==13) {atSym[i]="Al";atWeight[i]=26.98154}
  if (atNum[i]==14) {atSym[i]="Si";atWeight[i]=28.0855}
  if (atNum[i]==15) {atSym[i]="P";atWeight[i]=30.9738}
  if (atNum[i]==16) {atSym[i]="S";atWeight[i]=32.066}
}

```

```

if (atNum[i]==17) {atSym[i]="Cl";atWeight[i]=35.4527}
if (atNum[i]==18) {atSym[i]="Ar";atWeight[i]=39.948}
if (atNum[i]==19) {atSym[i]="K";atWeight[i]=39.0983}
if (atNum[i]==20) {atSym[i]="Ca";atWeight[i]=40.078}
if (atNum[i]==21) {atSym[i]="Sc";atWeight[i]=44.96}
if (atNum[i]==22) {atSym[i]="Ti";atWeight[i]=47.867}
if (atNum[i]==23) {atSym[i]="V";atWeight[i]=50.94}
if (atNum[i]==24) {atSym[i]="Cr";atWeight[i]=51.9961}
if (atNum[i]==25) {atSym[i]="Mn";atWeight[i]=54.938}
if (atNum[i]==26) {atSym[i]="Fe";atWeight[i]=55.845}
if (atNum[i]==27) {atSym[i]="Co";atWeight[i]=58.933}
if (atNum[i]==28) {atSym[i]="Ni";atWeight[i]=58.693}
if (atNum[i]==29) {atSym[i]="Cu";atWeight[i]=63.546}
if (atNum[i]==30) {atSym[i]="Zn";atWeight[i]=65.38}
if (atNum[i]==31) {atSym[i]="Ga";atWeight[i]=69.723}
if (atNum[i]==32) {atSym[i]="Ge";atWeight[i]=72.64}
if (atNum[i]==33) {atSym[i]="As";atWeight[i]=74.9216}
if (atNum[i]==34) {atSym[i]="Se";atWeight[i]=78.96}
if (atNum[i]==35) {atSym[i]="Br";atWeight[i]=79.904}
if (atNum[i]==46) {atSym[i]="Pd";atWeight[i]=106.42}
if (atNum[i]==53) {atSym[i]="I";atWeight[i]=126.90447}
# gets actual weight from freqinHP when possible so a prior calc with readisotopes gets you isotopic substitution
if ((i<100) && ($9>0)) atWeight[i]=$9
# if ((i>99) && ($8>0)) atWeight[i]=$8

if ((diag>1) && (i==1)) print "atNum[i],atSym[i],atWeight[i],geoArr[i,1],geoArr[i,2],geoArr[i,3]" >> "diagnostics"
if (diag>1) print atNum[i],atSym[i],atWeight[i],geoArr[i,1],geoArr[i,2],geoArr[i,3] >> "diagnostics"
}

# read in frequencies, scale them, read in Reduced masses, read in force
#constants, replace negative frequencies by 2 wavenumbers
numFreq=3*numAtoms-6
if (geometry=="linear") numFreq=3*numAtoms-5
for (i=1;i<=numFreq;i++) {
  $0=""
  getline < "tempfreqs"
  freq[i]=$0*scaling
  if (freq[i]<0) freq[i]=2
}
for (i=1;i<=numFreq;i++) {
  $0=""
  getline < "tempredmass"
  redMass[i]=$0
  if (redMass[i]=="") redMass[i]=1.
}
for (i=1;i<=numFreq;i++) {
  $0=""
  getline < "tempfrfc"
  frc[i]=$0
  if (frc[i]=="") frc[i]=0.0001
  if (frc[i]==0) frc[i]=0.0001
  if ((diag>1) && (i==1)) print "freq[i],redMass[i],frc[i]" >> "diagnostics"
  if (diag>1) print freq[i],redMass[i],frc[i] >> "diagnostics"
}

# read in the modes - note that trajectories always need a freq calc with freq=hpmodes unless classical=2
if (classical!=2) {
  for (i=1;i<=numFreq;i+=5) {
    for (j=1;j<=(3*numAtoms);j++) {
      getline < "tempmodes"
      mode[i,$2,$1]=$4; mode[i+1,$2,$1]=$5; mode[i+2,$2,$1]=$6; mode[i+3,$2,$1]=$7; mode[i+4,$2,$1]=$8
    }
  }
}

```



```

    }
  }
  if (diag>2) {for (i=1;i<=numFreq;i++) {print mode[i,1,1],mode[i,1,2],mode[i,1,3] >> "modesread"}}

# if doing a cannonball trajectory, read in the vector
if (cannonball>0) {
  for (i=1;i<=numAtoms;i++) {
    getline < "cannontraj"
    cannonArr[i,1]=$1; cannonArr[i,2]=$2; cannonArr[i,3]=$3
  }
}

# collect a series of random numbers from file temp811, generated from an outside random number generator called by
prodynstarterHP
# read from temp811, starting at a random place
srand(PROCINFO["pid"]); tester=rand()*1000
for (i=1;i<=tester;i++) getline < "temp811"
for (i=1;i<=numFreq;i++) {
  getline < "temp811"; randArr[i]=$1
  getline < "temp811"; randArrB[i]=$1
  getline < "temp811"; randArrC[i]=$1
}
if (rotationmode>0) {
  for (i=1;i<=6;i++) {
    getline < "temp811"; randArrR[i]=$1
  }
}

# for a QM distribution for a harmonic oscillator in its ground state, we want to generate a set of random numbers
#between -1 and 1 weighted such that numbers toward the center are properly more common
i=1
while (i<=numFreq) {
  if ((initialDis==2) || (disMode[i]==2)) {
    getline < "temp811"
    tempNum=2*($1-.5)
    prob=exp(-(tempNum^2))
    getline < "temp811"
    if ($1<prob) {
      randArrD[i]=tempNum
      i++
    }
  }
  if ((initialDis!=2) && (disMode[i]!=2)) i++
}

# to start without normal modes or frequencies we need to just pick a random direction for the motion of each atom, requiring 3N
random numbers
for (i=1;i<=numAtoms;i++) {
  for (j=1;j<=3;j++) {
    getline < "temp811"
    if ($1>0.5) randArrE[i,j]=1
    if ($1<.5) randArrE[i,j]=-1
  }
}

# determine energy in each normal mode
for (i=1;i<=numFreq;i++) {
  zpeJ[i]=0.5*h*c*freq[i] #units J per molecule
#if classical, treat as modes spaced by classicalSpacing wavenumbers
  if (classical==1) zpeJ[i]=0.5*h*c*classicalSpacing # the zpe is not used when classical but the spacing is used to calculate the
E in mode
  zpeK[i]=zpeJ[i]*avNum/4184 #units kcal/mol
}

```

```

if (temp<10) vibN[i]=0    # avoids working with very small temperatures - if the temp is too low, it just acts like 0 K
if (temp>=10) {
  zpeRat[i]=exp((-2*zpeK[i])/(RgasK*temp))
  if (zpeRat[i]==1) zpeRat[i]=.9999999999
  Q[i]=1/(1-zpeRat[i])
  newRand=randArr[i]
  vibN[i]=0
  tester=1/Q[i]
#   get up to 4000 excitations of low modes
  for (j=1;j<=(4000*zpeRat[i]+2);j++) {
    if (newRand>tester) vibN[i]++
    tester=tester+((zpeRat[i]^j)/Q[i])
  }
}
}

# figure out mode energies and maximum classical shift and then actual shift
# also calculated total energy desired for molecule
desiredModeEnK=0
for (i=1;i<=numFreq;i++) {
  modeEn[i]=(zpeJ[i]*1E18)*(2*vibN[i]+1) # units here are mDyne Angstroms for compatability with Gaussian force constants
  if (classical==1) modeEn[i]=(zpeJ[i]*1E18)*2*vibN[i] #no zpe when classical
  modeEnK[i]=zpeK[i]*(2*vibN[i]+1)
  if (classical==1) modeEnK[i]=zpeK[i]*2*vibN[i] #no zpe when classical
  desiredModeEnK=desiredModeEnK + modeEnK[i]
# no 1/2 hv for imaginary frequencies
# treating modes with frequencies <10 as translations, ignoring their zero point energies
  if (freq[i]<10) modeEn[i]=(zpeJ[i]*1E18)*(2*vibN[i])
  maxShift[i]=(2*modeEn[i]/frc[i])^0.5
# new 2012 initialDis 3 means random phase of normal mode
  if (initialDis==3) shift[i]=maxShift[i]*sin(randArrC[i]*3.141592*2)
  if (initialDis==2) shift[i]=maxShift[i]*randArrD[i]
  if (initialDis==1) shift[i]=maxShift[i]*(2*(randArrC[i]-0.5))
  if (initialDis==0) shift[i]=0
# lines below allow for setting of displacement mode for individual modes
# It used to be necessary to use disMode 10 to turn off displacements for a mode, but hopefully that bug is killed and you can use
disMode 0
  if (disMode[i]==3) shift[i]=maxShift[i]*sin(randArrC[i]*3.141592*2)
  if (disMode[i]==2) shift[i]=maxShift[i]*randArrD[i]
  if (disMode[i]==1) shift[i]=maxShift[i]*(2*(randArrC[i]-0.5))
  if (disMode[i]==10) shift[i]=0 #kept for backward compatability
  if (disMode[i]==0) shift[i]=0
# no displacements along imaginary frequencies and very low ones - it is better to treat these
# as translations - employing a shift can give you initial weird geometries
  if (freq[i]<10) shift[i]=0
  if (numimag==1) shift[1]=0
  if (numimag==2) shift[2]=0
}
for (i=1;i<=numFreq;i++) {
  if ((diag>1) && (i==1)) print "zpeJ[i],zpeK[i],zpeRat[i],Q[i],vibN[i],modeEn[i],maxShift[i],shift[i]" >> "diagnostics"
  if (diag>1) print zpeJ[i],zpeK[i],zpeRat[i],Q[i],vibN[i],modeEn[i],maxShift[i],shift[i] >> "diagnostics"
}
}

# multiply each of the modes by its shift and add them up
# Do not do this if classical=2
if (classical!=2) {
  for (i=1;i<=numFreq;i++) {
    for (j=1;j<=numAtoms;j++) {
      for (k=1;k<=3;k++) {
        shiftMode[i,j,k]=mode[i,j,k]*shift[i]
        geoArr[j,k]=geoArr[j,k]+shiftMode[i,j,k]
      }
    }
  }
}

```

```

    }
  }
}

#now start toward velocities
for (i=1;i<=numFreq;i++) {
  kinEn[i]=100000*(modeEn[i]-0.5*frc[i]*shift[i]^2) # the 100000 converts to g angstrom^2 s^2
  vel[i]=(2*kinEn[i]/(redMass[i]/avNum))^0.5 # in angstrom / s
#use searchdir in progdyn.conf to control the direction for trajectories started from a saddle point
  if (numimag>1) numimag=1 #only the first freq can be sent in the searchdir direction, the rest go in a random direction
  if (i>numimag) {
    if (randArrB[i]<0.5) vel[i]=-vel[i]
  }
  if (i==numimag) {
    if (searchdir=="negative") vel[i]=-vel[i]
  }
  if ((diag>1) && (i==1)) print "vel[i]" >> "diagnostics"
  if (diag>1) print vel[i] >> "diagnostics"
}

# if controlphase is being used, set the velocity on particular modes as positive or negative as requested
for (i=1;i<=numFreq;i++) {
  if ((controlPhase[i]=="positive") && (vel[i]<0)) vel[i]=-vel[i]
  if ((controlPhase[i]=="negative") && (vel[i]>0)) vel[i]=-vel[i]
}

# multiply each of the modes by its velocity and add them up
# Do not do this if classical=2
if (classical!=2) {
  for (i=1;i<=numFreq;i++) {
    for (j=1;j<=numAtoms;j++) {
      for (k=1;k<=3;k++) {
        velMode[i,j,k]=mode[i,j,k]*vel[i]*timestep
        velArr[j,k]=velArr[j,k]+velMode[i,j,k]
      }
    }
  }
}

# to start without normal modes or frequencies we figure out the energy per atom based on 1/2RT in degree of freedom
if (classical==2) {
# to avoid a bug with a box on, starts without modes should use the input geometry, not the standard
do {
  getline < "tempinputgeos"
  if (oldline==$0) $0=""
  oldline=$0
  atom = $1
  geoArr[atom,1]=$4; geoArr[atom,2]=$5; geoArr[atom,3]=$6
  geoArrOrig[atom,1]=$4; geoArrOrig[atom,2]=$5; geoArrOrig[atom,3]=$6
}
while (length($0) > 0)
degFreedomEnK=temp*RgasK
degFreedomEnJ=degFreedomEnK/(avNum/4184)
cartEn=degFreedomEnJ*1E18
kinEnCart=100000*cartEn
#print degFreedomEnK, degFreedomEnJ, cartEn, kinEnCart
for (i=1;i<=numAtoms;i++) {
  for (j=1;j<=3;j++) {
    velArr[i,j]=randArrE[i,j]*timestep*(2*kinEnCart/(atWeight[i]/avNum))^0.5
    if (DRP==1) velArr[i,j]=0
  }
}
}

```

```

}

# calculate the KE in the modes at this point
KEinitmodes=0
for (j=1;j<=numAtoms;j++) {
  KEinitmodes=KEinitmodes + 0.5*atWeight[j]*(velArr[j,1]^2 + velArr[j,2]^2 + velArr[j,3]^2)/((timestep^2)*conver1)
}

# add molecular rotation if requested
if (rotationmode>0) {
#establish three rotation vectors
  for (j=1;j<=numAtoms;j++) {
    rotateX[j,1]=0
    rotateX[j,2]=-geoArrOrig[j,3]
    rotateX[j,3]=geoArrOrig[j,2]
    rotateY[j,1]=-geoArrOrig[j,3]
    rotateY[j,2]=0
    rotateY[j,3]=geoArrOrig[j,1]
    rotateZ[j,1]=-geoArrOrig[j,2]
    rotateZ[j,2]=geoArrOrig[j,1]
    rotateZ[j,3]=0
  }
#figure out how much energy is in the raw vectors
  eRotX=0;eRotY=0;eRotZ=0
  for (j=1;j<=numAtoms;j++) {
    for (k=1;k<=3;k++) {
      eRotX=eRotX + 0.5*atWeight[j]*(rotateX[j,k]^2)/((timestep^2)*conver1)
      eRotY=eRotY + 0.5*atWeight[j]*(rotateY[j,k]^2)/((timestep^2)*conver1)
      eRotZ=eRotZ + 0.5*atWeight[j]*(rotateZ[j,k]^2)/((timestep^2)*conver1)
    }
  }
# print "rotation energies if raw vector used",eRotX,eRotY,eRotZ
#now decie how much energy we want in each rotation
  keRx=-0.5*0.001987*temp*log(1-randArrR[1])
  keRy=-0.5*0.001987*temp*log(1-randArrR[2])
  keRz=-0.5*0.001987*temp*log(1-randArrR[3])
  if (eRotX<1) keRx=0;if (eRotY<1) keRy=0;if (eRotZ<1) keRz=0
  rotEdesired=keRx+keRy+keRz
  signX=1;signY=1;signZ=1
  if (randArrR[4]<.5) signX=-1
  if (randArrR[5]<.5) signY=-1
  if (randArrR[6]<.5) signZ=-1

# print "desired energies",keRx,keRy,keRz,"and random numbers",randArrR[1],randArrR[2],randArrR[3]
#protect against zero rotations
  if (eRotX<1) eRotX=1;if (eRotY<1) eRotY=1;if (eRotZ<1) eRotZ=1
#now scale the rotational vectors
  scaleX=(keRx/eRotX)^.5
  scaleY=(keRy/eRotY)^.5
  scaleZ=(keRz/eRotZ)^.5
# print "scaling factors" scaleX,scaleY,scaleZ
  for (j=1;j<=numAtoms;j++) {
    for (k=1;k<=3;k++) {
      rotateX[j,k]=rotateX[j,k]*scaleX*signX
      rotateY[j,k]=rotateY[j,k]*scaleY*signY
      rotateZ[j,k]=rotateZ[j,k]*scaleZ*signZ
    }
  }
  for (j=1;j<=numAtoms;j++) {
# print rotateX[j,1]," ",rotateX[j,2]," ",rotateX[j,3]
  }
# print ""

```

```

    for (j=1;j<=numAtoms;j++) {
#   print rotateY[j,1]," ",rotateY[j,2]," ",rotateY[j,3]
    }
#   print ""
    for (j=1;j<=numAtoms;j++) {
#   print rotateZ[j,1]," ",rotateZ[j,2]," ",rotateZ[j,3]
    }
# now add the rotational vectors to velArr
    for (j=1;j<=numAtoms;j++) {
        for (k=1;k<=3;k++) {
            velArr[j,k]=velArr[j,k]+rotateX[j,k]+rotateY[j,k]+rotateZ[j,k]
        }
    }
}

# if doing a cannonball, adjust multiplier until extra energy is correct
if (cannonball>0) {
    multiplier=1; tester=0; tolerance=.1
    while (tester==0) {
        KEinittotal=0
        for (j=1;j<=numAtoms;j++) {
            cannonvelArr[j,1]=velArr[j,1]+multiplier*cannonArr[j,1]; cannonvelArr[j,2]=velArr[j,2]+multiplier*cannonArr[j,2];
cannonvelArr[j,3]=velArr[j,3]+multiplier*cannonArr[j,3]
            KEinittotal=KEinittotal + 0.5*atWeight[j]*(cannonvelArr[j,1]^2 + cannonvelArr[j,2]^2 +
cannonvelArr[j,3]^2)/((timestep^2)*conver1)
        }
        if (KEinittotal>(KEinitmodes+cannonball+tolerance)) multiplier=multiplier*0.98901364
        if (KEinittotal<(KEinitmodes+cannonball-tolerance)) multiplier=multiplier*1.01
        if ((KEinittotal<(KEinitmodes+cannonball+tolerance)) && (KEinittotal>(KEinitmodes+cannonball-tolerance))) tester=1
    }
    for (j=1;j<=numAtoms;j++) {
        velArr[j,1]=velArr[j,1]+multiplier*cannonArr[j,1]; velArr[j,2]=velArr[j,2]+multiplier*cannonArr[j,2];
velArr[j,3]=velArr[j,3]+multiplier*cannonArr[j,3]
    }
}

#output the new geometry.
# ***** this section changed for special experiment for cyclopentadiene. do not use this for other cases
# atWeight[4]=140.0001
# ***** line below added for special experiment switching mass from 12 to 140, keeping momenta the same
#velArr[4,1]=velArr[4,1]/11.66667; velArr[4,2]=velArr[4,2]/11.66667; velArr[4,3]=velArr[4,3]/11.66667
for (j=1;j<=numAtoms;j++) {
    printf("%2s % .7f % .7f % .7f %9.5f\n",atSym[j],geoArr[j,1],geoArr[j,2],geoArr[j,3],atWeight[j])
}

#output the velocities and calculate the total kinetic energy overall
KEinittotal=0
for (j=1;j<=numAtoms;j++) {
    KEinittotal=KEinittotal + 0.5*atWeight[j]*(velArr[j,1]^2 + velArr[j,2]^2 + velArr[j,3]^2)/((timestep^2)*conver1)
    printf("% .8f % .8f % .8f\n",velArr[j,1],velArr[j,2],velArr[j,3])
}

#anything else I add to the file will not affect the trajectories but will keep a record and be good for analysis
if (classical!=2) {
    for (i=1;i<=numFreq;i++) {
        if (initialDis==0) printf("% .6f % .6f %4i % 1.4e % .6f %1i\n",randArr[i],randArrB[i],vibN[i],vel[i],shift[i],
disMode[i])
        if (initialDis==1) printf("% .6f % .6f %4i % 1.4e % .6f %1i\n",randArr[i],randArrC[i],vibN[i],vel[i],shift[i],
disMode[i])
        if (initialDis==2) printf("% .6f % .6f %4i % 1.4e % .6f %1i\n",randArr[i],randArrD[i],vibN[i],vel[i],shift[i],
disMode[i])
        if (initialDis==3) printf("% .6f % .6f %4i % 1.4e % .6f %1i % .6f\n",randArr[i],randArrC[i],vibN[i],vel[i],shift[i],

```

```

disMode[i], sin(randArrC[i]*3.141592*2))
    }
}
print "temp ",temp
print "initialDis",initialDis
print "classical",classical
print "timestep",timestep
print "numimag",numimag
OFMT = "%.3f"
print "Total mode energy desired=",desiredModeEnK
print "KE initial from modes=",KEinitmodes," KE initial total=",KEinittotal," Rotational Energy desired=",rotEdesired
if (cannonball>0) print "cannonball",cannonball," cannon Energy=",KEinittotal-KEinitmodes
if (boxon>0) print "boxsize",boxsize
if (DRP>0) print "DRP",DRP," maxAtomMove",maxAtomMove
if (DRP>0) print maxAtomMove > "maxMove"
} # End of BEGIN

/Zero-point correction/ {zpeGauss=$3}
/zero-point Energies/ {zpePlusE=$7}
END {
zpeGaussK=zpeGauss*627.509
potentialE=zpePlusE - zpeGauss
OFMT = "%.6f"
print "Gaussian zpe=",zpeGauss,"or",zpeGaussK,"kcal/mol E + zpe=",zpePlusE," potential E=",potentialE
print "" #will use blank line to mark end of geoPlusVel file
}

```

## Program prog1stpoint

```

BEGIN {
# 2014 added ONIOMcharge, more reliable convergence commands
# 2013 added multiple NMR calculations, molecular rotations
# 2012 added NMR calculations
# 2011 added linkatoms in ONIOM
# aug 2010 changed so that it is more careful in reading in from geoPlusVel
# removed some default parameters that should always be defined
# Jan 2009 - a number of little changes to improve reporting, precision, etc
# aug 2008 added to atom list so handles H to Cl without change needed
# version Feb 2008 incorporates methodfile, boxon and boxsize, though this point unaffected by box
# version Jan 2008 - allows for ONIOM jobs, fixed atoms
# version Sept 2005 - incorporates meth3, meth4, meth5, meth6, but not yet rotation
# this program creates the first input file for g09
# the title should be changed as appropriate
# the isomer number comes from a file isomernumber

# default parameters, including quassiclassical, no displacements, transition state, not a DRP
# do not change these - rather, change progdyn.conf to set the parameters
initialDis=0; timestep=1E-15; scaling=1.0; temp=298.15
classical=0; numimag=1; DRP=0; cannonball=0
memory=20000000
diag=1; checkpoint="g09.chk"; searchdir="positive"; boxon=0
boxsize=10; maxAtomMove=0.1; title1="you"; title2="need"
title3="a"; title4="progdyn.conf"; processors=1; highlevel=999; linkatoms=0
geometry="nonlinear";nonstandard=0
nmrtype=0;nmrevery=9999999
oniomcharge=0; oniommult=0

#initialization
i=1;j=1;k=1
c=29979245800; h=6.626075E-34; avNum=6.0221415E23
RgasK=0.00198588; RgasJ=8.31447

```

```

numAtoms=0; atomnumber=0
getline < "runpointnumber"
runpointnum = $1

# read progdyn.conf for configuration info
blankLineTester=10
while (blankLineTester>1) {
  getline < "progdyn.conf"
  if ($1=="method") method=$2
  if ($1=="method2") meth2=$2
  if ($1=="charge") charge=$2
  if ($1=="onionchargemult") {
    onioncharge=$2
    oniommult=$3
  }
  if ($1=="multiplicity") multiplicity=$2
  if ($1=="memory") memory=$2
  if ($1=="processors") processors=$2
  if ($1=="checkpoint") checkpoint=$2
  if ($1=="timestep") timestep=$2
  if ($1=="diagnostics") diag=$2
  if ($1=="method3") meth3=$2
  if ($1=="method4") meth4=$2
  if ($1=="method5") meth5=$2
  if ($1=="method6") meth6=$2
  if ($1=="method7") meth7=$2
  if ($1=="highlevel") highlevel=$2
  if ($1=="linkatoms") linkatoms=$2
  if ($1=="fixedatom1") fixedatom1=$2
  if ($1=="fixedatom2") fixedatom2=$2
  if ($1=="fixedatom3") fixedatom3=$2
  if ($1=="fixedatom4") fixedatom4=$2
  if ($1=="methodfile") methodfilelines=$2
  if ($1=="killcheck") killcheck=$2
  if ($1=="NMRmethod") nmrmeth=$2
  if ($1=="NMRmethod2") nmrmeth2=$2
  if ($1=="NMRmethod3") nmrmeth3=$2
  if ($1=="NMRtype") nmrtype=$2
  if ($1=="NMRevery") nmrevery=$2
  if ($1=="nonstandard") nonstandard=$2
  if ($1=="title") {
    title1=$2
    title2=$3
    title3=$4
    title4=$5
  }
  blankLineTester=length($0)
}

if (diag==1) print "***** starting prog1stpoint *****" >> "diagnostics"
if (diag==1) print "method,charge,multiplicity,memory" >> "diagnostics"
if (diag==1) print method,charge,multiplicity,memory >> "diagnostics"
if (diag==1) print "processors,checkpoint,title" >> "diagnostics"
if (diag==1) print processors,checkpoint,title1,title2,title3,title4 >> "diagnostics"

getline < "isomernumber"
isomernum = $1
#read in number of atoms, geometry, masses, and velocity from geoPlusVel
getline < "geoPlusVel"
numAtoms=$1
# geometry
for (i=1;i<=numAtoms;i++) {

```

```

getline < "geoPlusVel"
weight[i]=$5
atSym[i]=$1
for (j=1;j<=3;j++) {
  geoArr[i,j]=$i(1+j)
}
}
#velocities not needed for 1st point
for (i=1;i<=numAtoms;i++) {
  getline < "geoPlusVel"
  for (j=1;j<=3;j++) {
    velArr[i,j]=$j
  }
}

print "%nproc=" processors
print "%mem=" memory
if (killcheck!=1) print "%chk=" checkpoint
if (nonstandard==0) {
  print "# " method " force scf=(xqc,maxconven=55,fulllinear,nosym) "
  if (meth2=="unrestricted") print "guess=mix" #for unrestricted calculations
  if (length(meth3)>2) print meth3
  if (length(meth4)>2) print meth4
}
if (nonstandard==1) {
  print "# "
  print "nonstd"
  system("cat nonstandard")
}
print ""
# make the title four words exactly, leaving out spaces if necessary
print title1,title2,title3,title4
print "runpoint ",runpointnum
print "runisomer ", isomernum
print ""
if (onionmult==0) print charge,multiplicity
if (onionmult>0) print charge,multiplicity,onioncharge,onionmult
}

END {
for (i=1;i<=numAtoms;i++) {
  printf("%s %.7f %.7f %.7f",atSym[i],geoArr[i,1],geoArr[i,2],geoArr[i,3])
  if ((i>highlevel) && (i<=highlevel+linkatoms)) printf(" %s","M H")
  if (i>(highlevel+linkatoms)) printf(" %s","M")
  print ""
}
print ""
if (length(meth5)>2) print meth5
if (length(meth6)>2) print meth6
if (methodfilelines>=1) {
  for (i=1;i<=methodfilelines;i++) {
    getline < "methodfile"
    print $0
  }
}
}
if ((nmrtype>0) && ((runpointnum % nmrevery)==0)) {
  print "--link1--"
  print "%nproc=" processors
  print "%mem=" memory
  print "%chk=" checkpoint
  print "# " nmrmethod " nmr=giao geom=check"
  if (nmrmethod==method) print "guess=tcheck"
}

```



```

if (length(meth7)>2) print meth7
print ""
print title1,title2,title3,title4
print "runpoint ",runpointnum
print "runisomer ",isomernum
print ""
print charge,multiplicity
}
print ""
if ((nmrtype>1) && ((runpointnum % nmrevery)==0)) {
  print "--link1--"
  print "%nproc=" processors
  print "%mem=" memory
  print "%chk=" checkpoint
  print "# " nmrmeth2 " nmr=giao geom=check"
  if (length(meth7)>2) print meth7
  print ""
  print title1,title2,title3,title4
  print "runpoint ",runpointnum
  print "runisomer ",isomernum
  print ""
  print charge,multiplicity
}
print ""
if ((nmrtype>2) && ((runpointnum % nmrevery)==0)) {
  print "--link1--"
  print "%nproc=" processors
  print "%mem=" memory
  print "%chk=" checkpoint
  print "# " nmrmeth3 " nmr=giao geom=check"
  if (length(meth7)>2) print meth7
  print ""
  print title1,title2,title3,title4
  print "runpoint ",runpointnum
  print "runisomer ",isomernum
  print ""
  print charge,multiplicity
}
print ""
}

```

## Program prog2ndpoint

```

BEGIN {
# 2014 added ONIOMcharge, more reliable convergence commands
# aug 2013 includes molecular rotation, ability to do multiple NMR calculations, ONIOM with link atoms,
#nonstandard routes, checks more kinds of energies at point 2
#Aug 2010 added etolerance to make it controllable from progdyn.conf, made it so that DRP does not check energy
# aug 2008 added to atom list so handles 1 to 17 without change needed
# version Feb 2008 incorporates methodfile, boxon and boxsize, though this point unaffected by box
# version Jan 2008 - allows for ONIOM jobs, fixed atoms
# version Sept 9, 2005 - incorporates meth3, meth4, meth5, meth6, but not yet rotation
# read progdyn.conf for configuration info

# default parameters, including quassiclassical, no displacements, transition state, not a DRP
# do not change these - rather, change progdyn.conf to set the parameters
initialDis=0; timestep=1E-15; scaling=1.0; temp=298.15
classical=0; numimag=1; DRP=0; cannonball=0
memory=20000000
diag=1; checkpoint="g09.chk"; searchdir="positive"; boxon=0
boxsize=10; maxAtomMove=0.1; title1="you"; title2="need"

```

```

title3="a"; title4="progdyn.conf"; processors=1; highlevel=999; linkatoms=0
etolerance=1
geometry="nonlinear";nonstandard=0
NMRtype=none;NMRevery=9999999
oniomcharge=0; oniommult=0

#initialization
i=1;j=1;k=1
c=29979245800; h=6.626075E-34; avNum=6.0221415E23
RgasK=0.00198588; RgasJ=8.31447
numAtoms=0; atomnumber=0
getline < "runpointnumber"
runpointnum = $1

blankLineTester=10
while (blankLineTester>1) {
  getline < "progdyn.conf"
  if ($1=="method") method=$2
  if ($1=="method2") meth2=$2
  if ($1=="charge") charge=$2
  if ($1=="oniomchargemult") {
    oniomcharge=$2
    oniommult=$3
  }
  if ($1=="multiplicity") multiplicity=$2
  if ($1=="memory") memory=$2
  if ($1=="processors") processors=$2
  if ($1=="checkpoint") checkpoint=$2
  if ($1=="timestep") timestep=$2
  if ($1=="diagnostics") diag=$2
  if ($1=="method3") meth3=$2
  if ($1=="method4") meth4=$2
  if ($1=="method5") meth5=$2
  if ($1=="method6") meth6=$2
  if ($1=="method7") meth7=$2
  if ($1=="highlevel") highlevel=$2
  if ($1=="linkatoms") linkatoms=$2
  if ($1=="fixedatom1") fixedatom1=$2
  if ($1=="fixedatom2") fixedatom2=$2
  if ($1=="fixedatom3") fixedatom3=$2
  if ($1=="fixedatom4") fixedatom4=$2
  if ($1=="DRP") DRP=$2
  if ($1=="methodfile") methodfilelines=$2
  if ($1=="killcheck") killcheck=$2
  if ($1=="etolerance") etolerance=$2
  if ($1=="reversetrajectory") reversetrajectory=$2
  if ($1=="NMRmethod") nmrmeth=$2
  if ($1=="NMRmethod2") nmrmeth2=$2
  if ($1=="NMRmethod3") nmrmeth3=$2
  if ($1=="NMRtype") nmrtype=$2
  if ($1=="NMRevery") nmrevery=$2
  if ($1=="nonstandard") nonstandard=$2
  if ($1=="title") {
    title1=$2
    title2=$3
    title3=$4
    title4=$5
  }
  blankLineTester=length($0)
}

if (diag>=1) print "***** starting prog2ndpoint *****" >> "diagnostics"

```

```

if (diag>=1) print "method,charge,multiplicity,memory" >> "diagnostics"
if (diag>=1) print method,charge,multiplicity,memory >> "diagnostics"
if (diag>=1) print "processors,checkpoint,title" >> "diagnostics"
if (diag>=1) print processors,checkpoint,title1,title2,title3,title4 >> "diagnostics"

#get the isomer number from file
getline < "isomernumber"
isomernum = $1

#get forward or reverse from skipstart if it exists
getline < "skipstart"
trajdirection = $1

print "%nproc=" processors
print "%mem=" memory
if (killcheck!=1) print "%chk=" checkpoint
if (nonstandard==0) {
  print "# " method " force scf=(xqc,maxconven=55,fulllinear_nosym) "
  if (meth2=="unrestricted") print "guess=mix" #for unrestricted calculations
  if (meth2=="read") print "guess=tcheck" #for reading orbitals from check, sometimes faster, sometimes not
  if (length(meth3)>2) print meth3
  if (length(meth4)>2) print meth4
}
if (nonstandard==1) {
  print "# "
  print "nonstd"
  system("cat nonstandard")
}
print ""
print title1,title2,title3,title4
print "runpoint ",runpointnum
print "runisomer ", isomernum
print ""
if (oniommult==0) print charge,multiplicity
if (oniommult>0) print charge,multiplicity,oniomcharge,oniommult

# ok, now we have to figure the second point. this should be
#  $x(t) = x + v*t + 1/2*F*t^2/m$ 
# so we need to set up arrays for position, velocity, and force

#read in number of atoms, geometry, masses, and velocity from geoPlusVel
getline < "geoPlusVel"
numAtoms=$1
# geometry
for (i=1;i<=numAtoms;i++) {
  getline < "geoPlusVel"
  weight[i]=$5
  atSym[i]=$1
  for (j=1;j<=3;j++) {
    geoArr[i,j]=$(1+j)
  }
}
#velocities
for (i=1;i<=numAtoms;i++) {
  getline < "geoPlusVel"
  for (j=1;j<=3;j++) {
    velArr[i,j]=$j
  }
}

#now we go ahead and add the velocities
for (i=1;i<=numAtoms;i++) {

```

```

for (j=1;j<=3;j++) {
  arr[i,j]=velArr[i,j]+geoArr[i,j]
  if (trajdirection=="reverserestart") arr[i,j]=geoArr[i,j]-velArr[i,j]
}
if ((diag>1) && (i==1)) print "geometry after adding velocities" >> "diagnostics"
if (diag>1) print arr[i,1],arr[i,2],arr[i,3] >> "diagnostics"
}

#pull out other information useful for testing whether total energy is right or bad
blankLineTester=10
while (blankLineTester>1) {
  getline < "geoPlusVel"
  if ($4=="desired=") desiredModeEnK=$5
  if ($4=="modes=") {
    KEinitmodes=$5
    KEinittotal=$9
  }
  if ($11=="potential") potentialE=$13
  blankLineTester=length($0)
}
#get initial geometry into file traj
print numAtoms >> "traj"
print potentialE,title1,title2,title3,title4,"runpoint 1 ", "runisomer ",isomernum >> "traj"
for (i=1;i<=numAtoms;i++) {
  print atSym[i],geoArr[i,1],geoArr[i,2],geoArr[i,3] >> "traj"
}
#added by Samae on 102910
scfcount=0
} # end of BEGIN

#pull out the potential energy
/SCF Done/ || /EUMP2 =/ || / Energy=/ {
if (($1=="Energy=") && ($3=="NIter=")) newPotentialE=$2
if (($1=="SCF") && (scfcount==0)) newPotentialE=$5
if ($1=="E2") {
  tempstring=$6
  split(tempstring, arr10, "D")
  newPotentialE=arr10[1]*(10^arr10[2])
}
newPotentialEK=(newPotentialE-potentialE)*627.509
if ($1=="SCF") {
  if (scfcount==0) {
    pddga=$5
  }
  if (scfcount==1) {
    qm=$5
  }
  if (scfcount==2) {
    pddgb=$5
    pddgc=(pddga-pddgb)
    newPotentialE=(qm+pddgc)
    newPotentialEK=(newPotentialE-potentialE)*627.509
  }
  scfcount++
}
}

# now we go ahead and translate the forces and add them
(/ 1 /||/ 2 /||/ 3 /||/ 4 /||/ 5 /||/ 6 /||/ 7 /||/ 8 /||/ 9 /||/ 10 /||/
11 /||/ 12 /||/ 13 /||/ 14 /||/ 15 /||/ 16 /||/ 17 /||/ 18 /||/ 19 /||/ 20 /||/
21 /||/ 22 /||/ 23 /||/ 24 /||/ 25 /||/ 26 /||/ 27 /||/ 28 /||/ 29 /||/ 30 /||/
31 /||/ 32 /||/ 33 /||/ 34 /||/ 35 /) && length($3) > 9 {

```

```

i=$1
for (j=1;j<=3;j++) {
  forceArr[i,j]=$i*(2+j) #the raw units of the forces are Hartree/Bohr
}
if ((diag>1) && (i==1)) print "i,weight[i],forceArr[i,1],forceArr[i,2],forceArr[i,3]" >> "diagnostics"
if (diag>1) print i,weight[i],forceArr[i,1],forceArr[i,2],forceArr[i,3] >> "diagnostics"
}

END {
#put out Echeck but only if not a DRP
if (DRP==0) {
  print "trajectory #" ,isomernum >> "Echeck"
  print "point 1 potential E=",newPotentialEK," point 1 kinetic E=" ,KEinitmodes," Total=" ,newPotentialEK+KEinitmodes >>
"Echeck"
  print "desired total energy=" , desiredModeEnK >> "Echeck"
  if ((newPotentialEK+KEinitmodes)>(desiredModeEnK+etolerance)) print "XXXX bad total Energy" >> "Echeck"
  if ((newPotentialEK+KEinitmodes)<(desiredModeEnK-etolerance)) print "XXXX bad total Energy" >> "Echeck"
}
# turn the forces into motion
for (i=1;i<=numAtoms;i++) {
  for (j=1;j<=3;j++) {
# conversions here take force to J/angstrom, 1E20 converts to kg angstroms / s^2, then mult time (s^s) and divide by weight in kg
to get angstroms
  forceArr[i,j]=0.5*1E20*forceArr[i,j]*627.509*(4184/(0.529177*avNum))*(timestep^2)/(weight[i]/(avNum*1000))
# for simplicity, DRPs will throw away the forces at the second pont. This means that if we are not at a saddlepoint, point 2 =
point 1 but this is a minor waste
  if (DRP==1) forceArr[i,j]=0
  arr[i,j]=arr[i,j]+forceArr[i,j]
# if atoms are fixed, replace calcd new position by original position
  if ((i==fixedatom1) || (i==fixedatom2) || (i==fixedatom3) || (i==fixedatom4)) arr[i,j]=geoArr[i,j]
}
if ((diag>1) && (i==1)) print "i,weight[i],forceArr[i,1],forceArr[i,2],forceArr[i,3]" >> "diagnostics"
if (diag>1) print i,weight[i],forceArr[i,1],forceArr[i,2],forceArr[i,3] >> "diagnostics"
printf("%s %.7f %.7f %.7f",atSym[i],arr[i,1],arr[i,2],arr[i,3])
if ((i>highlevel) && (i<=highlevel+linkatoms)) printf(" %s", "M H")
if (i>(highlevel+linkatoms)) printf(" %s", "M")
print ""
}
print ""
if (length(meth5)>2) print meth5
if (length(meth6)>2) print meth6
if (methodfilelines>=1) {
  for (i=1;i<=methodfilelines;i++) {
    getline < "methodfile"
    print $0
  }
}
if ((nmrtype>0) && ((runpointnum % nmrevery)==0)) {
  print "--link1--"
  print "%nproc=" processors
  print "%mem=" memory
  print "%chk=" checkpoint
  print "# " nmrmethod " nmr=giao geom=check"
  if (nmrmethod==method) print "guess=tcheck"
  if (length(meth7)>2) print meth7
  print ""
  print title1 ,title2,title3,title4
  print "runpoint " ,runpointnum
  print "runisomer " ,isomernum
  print ""
  print charge,multiplicity
}
}

```

```

print ""
if ((nmrtype>1) && ((runpointnum % nmrevery)==0)) {
  print "--link1--"
  print "%nproc=" processors
  print "%mem=" memory
  print "%chk=" checkpoint
  print "# " nmrmeth2 " nmr=giao geom=check"
  if (length(meth7)>2) print meth7
  print ""
  print title1,title2,title3,title4
  print "runpoint ",runpointnum
  print "runisomer ",isomernum
  print ""
  print charge,multiplicity
}
print ""
if ((nmrtype>2) && ((runpointnum % nmrevery)==0)) {
  print "--link1--"
  print "%nproc=" processors
  print "%mem=" memory
  print "%chk=" checkpoint
  print "# " nmrmeth3 " nmr=giao geom=check"
  if (length(meth7)>2) print meth7
  print ""
  print title1,title2,title3,title4
  print "runpoint ",runpointnum
  print "runisomer ",isomernum
  print ""
  print charge,multiplicity
}
print ""
#get second geometry into file traj
print numAtoms >> "traj"
print newPotentialE,title1,title2,title3,title4,"runpoint ",runpointnum,"runisomer ",isomernum >> "traj"
for (i=1;i<=numAtoms;i++) {
  print atSym[i],arr[i,1],arr[i,2],arr[i,3] >> "traj"
}
}

```

## Program progdynb

```

BEGIN { #this is the main routine for generating new .com files by the Verlet algorithm
# Oct 2015 added sanity check, eliminated dyn files and keepevery
# May 2015 added ability to force solvent into a sphere
# Feb 2015 added zeroatom ability to make solute centered in solvent
# Jan 2015 added applyforce to apply forces on motion of atoms and allow PMF calculations
# Dec 2014 added oniom charge specifications
# 2013 added multiple NMR calculations, molecular rotations, thermostat commands
# 2012 added NMR calculations
# 2011 added linkatoms in ONIOM
# Aug 2010 increased elements handled automatically but only up to bromine!
# Jan 2009 - a number of little changes to improve reporting, precision, etc
# Nov 2008 added ability to handle DRPs
# Aug 2008 added long list of atoms to handle 1-17 without change
# May 2008 added option to put out velocities in vellist - make diag=3
# version Feb 2008 incorporates methodfile, boxon and boxsize
# version Jan 2008 incorporates fixed atoms, oniom, and velocity damping
# version August 2007 incorporates keepevery to decrease size of dyn file
# version Sept 11, 2005 - incorporatates meth3, meth4, meth5, meth6, but not yet rotation

# default parameters, including quassiclassical, no displacements, transition state, not a DRP

```

```
# do not change these - rather, change progdyn.conf to set the parameters
initialDis=0; timestep=1E-15; scaling=1.0; temp=298.15
classical=0; numimag=1; DRP=0; cannonball=0
memory=20000000
diag=1; checkpoint="g09.chk"; searchdir="positive"; boxon=0
boxsize=10; maxAtomMove=0.1; title1="you"; title2="need"
title3="a"; title4="progdyn.conf"; processors=1; highlevel=99999; linkatoms=0
damping=1;nonstandard=0
nmrtype=0;nmrevery=9999999;nmrcc=0;nmrrand=0;nmrdo=0
thermostat=0;thermostatmult=1.00
onioncharge=0; oniommult=0
applyforce=0; applyforceB=0; applyforceC=0; zeroatomon=0
sphereon=0; spheresize=999; sphereforceK=0.01
```

```
#initialization
srand(PROCINFO["pid"])
i=1;j=1;k=1
c=29979245800; h=6.626075E-34; avNum=6.0221415E23
RgasK=0.00198588; RgasJ=8.31447; pi=3.14159265359
numAtoms=0; atomnumber=0
conver1=4.184E26 #dividing by this converts amu angstrom^2 / s^2 to kcal/mol
OFS=" "
```

```
# read progdyn.conf for configuration info
blankLineTester=10
while (blankLineTester>1) {
  getline < "progdyn.conf"
  if ($1=="method") method=$2
  if ($1=="method2") meth2=$2
  if ($1=="charge") charge=$2
  if ($1=="multiplicity") multiplicity=$2
  if ($1=="onionchargemult") {
    onioncharge=$2
    oniommult=$3
  }
  if ($1=="memory") memory=$2
  if ($1=="processors") processors=$2
  if ($1=="checkpoint") checkpoint=$2
  if ($1=="timestep") timestep=$2
  if ($1=="diagnostics") diag=$2
  if ($1=="temperature") temp=$2
  if ($1=="thermostat") thermostat=$2
  if ($1=="thermostatmult") thermostatmult=$2
  if (thermostatmult>1) thermostatmult=1/thermostatmult
  if ($1=="method3") meth3=$2
  if ($1=="method4") meth4=$2
  if ($1=="method5") meth5=$2
  if ($1=="method6") meth6=$2
  if ($1=="method7") meth7=$2
  if ($1=="highlevel") highlevel=$2
  if ($1=="linkatoms") linkatoms=$2
  if ($1=="fixedatom1") fixedatom1=$2
  if ($1=="fixedatom2") fixedatom2=$2
  if ($1=="fixedatom3") fixedatom3=$2
  if ($1=="fixedatom4") fixedatom4=$2
  if ($1=="boxon") boxon=$2
  if ($1=="boxsize") boxsize=$2
  if ($1=="sphereon") sphereon=$2
  if ($1=="spheresize") spheresize=$2
  if ($1=="sphereforce") sphereforceK=$2
  if ($1=="DRP") DRP=$2
  if ($1=="maxAtomMove") maxAtomMove=$2
```

```

if ($1=="methodfile") methodfilelines=$2
if ($1=="killcheck") killcheck=$2
if ($1=="damping") damping=$2
if ($1=="NMRmethod") nmrmethod=$2
if ($1=="NMRmethod2") nmrmethod2=$2
if ($1=="NMRmethod3") nmrmethod3=$2
if ($1=="NMRtype") nmrtype=$2
if ($1=="NMRevery") nmrevery=$2
if ($1=="NMRrand") nmrrand=$2
if ($1=="loadlimit") loadlimit=$2
if ($1=="NMRcc") nmrcc=$2
if ($1=="nonstandard") nonstandard=$2
if ($1=="applyforce") {
  applyforce=$2; apforce=$3; apforceX0=$4; apforce2=$5; apforce3=$6
}
if ($1=="applyforceB") {
  applyforceB=$2; apforceB=$3; apforceX0B=$4; apforce2B=$5; apforce3B=$6
}
if ($1=="applyforceC") {
  applyforceC=$2; apforceC=$3; apforceX0C=$4; apforce2C=$5; apforce3C=$6
}
if ($1=="afatoms") {
  for (i=1;i<8;i++) {
    if ($(i+1)>0) afatom[i]=$ (i+1)
  }
}
if ($1=="afatomsB") {
  for (i=1;i<8;i++) {
    if ($(i+1)>0) afatomB[i]=$ (i+1)
  }
}
if ($1=="afatomsC") {
  for (i=1;i<8;i++) {
    if ($(i+1)>0) afatomC[i]=$ (i+1)
  }
}
if ($1=="zeroatom") {
  zeroatomon=1
  zeroatom=$2
}
if ($1=="title") {
  title1=$2
  title2=$3
  title3=$4
  title4=$5
}
blankLineTester=length($0)
}

if (diag>=1) print "***** starting progdynb *****" >> "diagnostics"
if (diag>=1) print "method,charge,multiplicity,memory" >> "diagnostics"
if (diag>=1) print method,charge,multiplicity,memory >> "diagnostics"
if (diag>=1) print "processors,checkpoint,title" >> "diagnostics"
if (diag>=1) print processors,checkpoint,title1,title2,title3,title4 >> "diagnostics"

# get number of atoms and weights from geoPlusVel, and previous geometries from old and older
getline < "geoPlusVel"
numAtoms=$1
for (i=1;i<=numAtoms;i++) {
  getline < "geoPlusVel"
  weight[i]=$5; atSym[i]=$1
}

```



```

blankLineTester=10
while (blankLineTester>1) {
  getline < "geoPlusVel"
  if ($1=="potential") potentialE=$13
  blankLineTester=length($0)
}

for (at=1;at<=numAtoms;at++) {
  getline < "old"
  oldarr[at,1]=$4; oldarr[at,2]=$5; oldarr[at,3]=$6
}

for (at=1;at<=numAtoms;at++) {
  getline < "older"
  olderarr[at,1]=$4; olderarr[at,2]=$5; olderarr[at,3]=$6
}

#for DRPs read in oldAdjForces and maxAtomMove
if (DRP==1) {
  for (at=1;at<=numAtoms;at++) {
    getline < "oldAdjForces"
    oldForce[at,1]=$1; oldForce[at,2]=$2; oldForce[at,3]=$3
  }
  getline < "maxMove"
  if (($1<maxAtomMove) && ($1>0)) maxAtomMove=$1
  if (maxAtomMove<0.000001) maxAtomMove=0.000001
}

# record atom velocities for IVR analysis. This is actually the velocity in the previous run, which is the easiest to calculate.
getline < "isomernumber"
isomernum = $1
getline < "runpointnumber"
runpointnum = $1
# routine to control whether NMR calculations are done.
if ((nmrrand==0) && ((runpointnum % nmrevery)==0)) nmrdo=1
if ((nmrrand==1) && (rand()<(1/nmrevery))) nmrdo=1
getline < "uptimelist"
x=1.0001*substr($10,1,3);if (x<8) x=8
# turn of nmrs if load is too high - this is under control of loadlimit parameter in progdyn.conf and requires proganal to make
uptimelist
if ((nmrrand==1) && (x>loadlimit)) nmrdo=0

if (diag==3) print "runpoint ",runpointnum-1,"runisomer ",isomernum >> "vellist"
for (at=1;at<=numAtoms;at++) {
  atomVel=((oldarr[at,1]-olderarr[at,1])^2 + (oldarr[at,2]-olderarr[at,2])^2 + (oldarr[at,3]-olderarr[at,3])^2)^.5
  KEold=KEold+0.5*weight[at]*(atomVel^2)/((timestep^2)*conver1)
  if (diag==3) print atomVel >> "vellist"
}
}

#pull out the potential energy
/SCF Done/ // EUMP2 =/ // Energy=/ // ONIOM:/ {
if (($1=="Energy=") && ($3=="NIter=")) newPotentialE=$2
if ($1=="SCF") newPotentialE=$5
if ($2=="extrapolated") newPotentialE=$5
if ($1=="E2") {
  tempstring=$6
  split(tempstring, arr10, "D")
  newPotentialE=arr10[1]*(10^arr10[2])
}
}
newPotEK=(newPotentialE-potentialE)*627.509
}

```

```

#must adjust next line for weird atoms
(/ 1 / // / 2 / // / 3 / // / 4 / // / 5 / // / 6 / // / 7 / // / 8 / // / 9 / // / 10 / // /
11 / // / 12 / // / 13 / // / 14 / // / 15 / // / 16 / // / 17 / // / 18 / // / 19 / // / 20 / // /
21 / // / 22 / // / 23 / // / 24 / // / 25 / // / 26 / // / 27 / // / 28 / // / 29 / // / 30 / // /
31 / // / 32 / // / 33 / // / 34 / // / 35 /) && length($3) > 9 {
i=$1
for (j=1;j<=3;j++) {
  forceArr[i,j]=$i(2+j) #the raw units of the forces are Hartree/Bohr
}
#if ((diag>1) && (i==1)) print "i,weight[i],forceArr[i,1],forceArr[i,2],forceArr[i,3]" >> "diagnostics"
#if (diag>1) print i,weight[i],forceArr[i,1],forceArr[i,2],forceArr[i,3] >> "diagnostics"
}

END {
# sanity check - avoids trajectory blow up
for (at=1;at<=numAtoms;at++) {
  if (((oldarr[at,1]-olderarr[at,1])^2)>1) exit
}
#routine to apply a force to bring atoms within a sphere - note that if atoms are too far outside of a sphere then the force on them
will be very large
#unless sphereforce is turned down
if (sphereon==1) {
  sphereforcetotal=0; totalweight=0
  for (i=1;i<=numAtoms;i++) {
    distToOrig=((oldarr[i,1]^2+oldarr[i,2]^2+oldarr[i,3]^2)^.5)
    if (distToOrig>spheresize) {
#originally tried a harmonic restoration to the sphere but this is too big for atoms far outside the sphere
      sphereforce=sphereforceK*(distToOrig-spheresize)
      if (sphereforce>0.01) sphereforce=0.01
      sphereforcetotal=sphereforcetotal+sphereforce
# tried a constant force outside of sphere but am worried about what this means since the potential is discontinuous and steps are
discrete
# sphereforce=sphereforceK

unitX=sphereforce*oldarr[i,1]/distToOrig;unitY=sphereforce*oldarr[i,2]/distToOrig;unitZ=sphereforce*oldarr[i,3]/distToOrig
forceArr[i,1]=forceArr[i,1]-unitX;forceArr[i,2]=forceArr[i,2]-unitY;forceArr[i,3]=forceArr[i,3]-unitZ
}
# calculate the density at 0.9*spheresize
if (distToOrig<0.9*spheresize) {
  totalweight=totalweight+weight[i]
}
}
density=(totalweight/avNum)/((4/3)*pi*(0.9*spheresize*1E-8)^3)
}
# routine to apply forces between atoms, used for umbrella sampling
# the next few lines are a kludge to apply the force to one of a series of atoms, whichever is closest to afatom[1]
for (i=3;i<8;i++) {
  if (afatom[i]>0) {
    if(Distance(afatom[1],afatom[i])<Distance(afatom[1],afatom[2])) afatom[2]=afatom[i]
  }
  if (afatomB[i]>0) {
    if(Distance(afatomB[1],afatomB[i])<Distance(afatomB[1],afatomB[2])) afatomB[2]=afatomB[i]
  }
  if (afatomC[i]>0) {
    if(Distance(afatomC[1],afatomC[i])<Distance(afatomC[1],afatomC[2])) afatomC[2]=afatomC[i]
  }
}
# applyforce 1 puts a linear constant force.
# applyforce 2 puts on a harmonic restoring force to apforceX0
if (applyforce>0) {
  delX=oldarr[afatom[1],1]-oldarr[afatom[2],1];delY=oldarr[afatom[1],2]-oldarr[afatom[2],2];delZ=oldarr[afatom[1],3]-

```

```

oldarr[afatom[2],3];
  distatoms=(delX^2+delY^2+delZ^2)^.5
  if (applyforce==2) apforce=apforce*(distatoms-apforceX0)
  if (applyforce==3) apforce=apforce*(distatoms-apforceX0) + apforce2*(distatoms-apforceX0)^2
  if (applyforce==4) apforce=apforce*(distatoms-apforceX0) + apforce2*(distatoms-apforceX0)^2 + apforce3*(distatoms-
apforceX0)^3
  unitX=apforce*delX/distatoms;unitY=apforce*delY/distatoms;;unitZ=apforce*delZ/distatoms;
  forceArr[afatom[1],1]=forceArr[afatom[1],1]-unitX;forceArr[afatom[1],2]=forceArr[afatom[1],2]-
unitY;forceArr[afatom[1],3]=forceArr[afatom[1],3]-unitZ

forceArr[afatom[2],1]=forceArr[afatom[2],1]+unitX;forceArr[afatom[2],2]=forceArr[afatom[2],2]+unitY;forceArr[afatom[2],3]=
forceArr[afatom[2],3]+unitZ
}
if (applyforceB>0) {
  delX=oldarr[afatomB[1],1]-oldarr[afatomB[2],1];delY=oldarr[afatomB[1],2]-oldarr[afatomB[2],2];delZ=oldarr[afatomB[1],3]-
oldarr[afatomB[2],3];
  distatoms=(delX^2+delY^2+delZ^2)^.5
  if (applyforceB==2) apforceB=apforceB*(distatoms-apforceX0B)
  if (applyforceB==3) apforceB=apforceB*(distatoms-apforceX0B) + apforce2B*(distatoms-apforceX0B)^2
  if (applyforceB==4) apforceB=apforceB*(distatoms-apforceX0B) + apforce2B*(distatoms-apforceX0B)^2 +
apforce3B*(distatoms-apforceX0B)^3
  unitX=apforceB*delX/distatoms;unitY=apforceB*delY/distatoms;;unitZ=apforceB*delZ/distatoms;
  forceArr[afatomB[1],1]=forceArr[afatomB[1],1]-unitX;forceArr[afatomB[1],2]=forceArr[afatomB[1],2]-
unitY;forceArr[afatomB[1],3]=forceArr[afatomB[1],3]-unitZ

forceArr[afatomB[2],1]=forceArr[afatomB[2],1]+unitX;forceArr[afatomB[2],2]=forceArr[afatomB[2],2]+unitY;forceArr[afatom
B[2],3]=forceArr[afatomB[2],3]+unitZ
}
if (applyforceC>0) {
  delX=oldarr[afatomC[1],1]-oldarr[afatomC[2],1];delY=oldarr[afatomC[1],2]-oldarr[afatomC[2],2];delZ=oldarr[afatomC[1],3]-
oldarr[afatomC[2],3];
  distatoms=(delX^2+delY^2+delZ^2)^.5
  if (applyforceC==2) apforceC=apforceC*(distatoms-apforceX0C)
  if (applyforceC==3) apforceC=apforceC*(distatoms-apforceX0C) + apforce2C*(distatoms-apforceX0C)^2
  if (applyforceC==4) apforceC=apforceC*(distatoms-apforceX0C) + apforce2C*(distatoms-apforceX0C)^2 +
apforce3C*(distatoms-apforceX0C)^3
  unitX=apforceC*delX/distatoms;unitY=apforceC*delY/distatoms;;unitZ=apforceC*delZ/distatoms;
  forceArr[afatomC[1],1]=forceArr[afatomC[1],1]-unitX;forceArr[afatomC[1],2]=forceArr[afatomC[1],2]-
unitY;forceArr[afatomC[1],3]=forceArr[afatomC[1],3]-unitZ

forceArr[afatomC[2],1]=forceArr[afatomC[2],1]+unitX;forceArr[afatomC[2],2]=forceArr[afatomC[2],2]+unitY;forceArr[afatom
C[2],3]=forceArr[afatomC[2],3]+unitZ
}
#routine to slowly move an atom toward the origin as set by a harmonic potential
if (zeroatomon==1) {
  multiple=0.99996
  oldarr[zeroatom,1]=multiple*oldarr[zeroatom,1]
  oldarr[zeroatom,2]=multiple*oldarr[zeroatom,2]
  oldarr[zeroatom,3]=multiple*oldarr[zeroatom,3]
}
#print out some things to vlist and do thermostat
apparentTemp=KEold*(2/(3*RgasK*numAtoms))
# the damping in the thermostat is based on temperature based on old geo vs older geo
if (thermostat==1) {
  if (diag<4) print "KEold",KEold,"desired temperature",temp,"apparent Temperature",apparentTemp >> "vlist"
  if (apparentTemp>temp) damping=thermostatmult
  if (apparentTemp<temp) damping=1/thermostatmult
}

#####routine for DRPs#####
if (DRP==1) {
  maxForce=0;oscillTest=0

```

```

for (i=1;i<=numAtoms;i++) {
  for (j=1;j<=3;j++) {
# conversions here take force to J/angstrom, 1E20 converts to kg angstroms / s^2, then mult time (s^s) and divide by weight in kg
to get angstroms
    forceArr[i,j]=1E20*forceArr[i,j]*627.509*(4184/(0.529177*avNum))*(timestep^2)/(weight[i]/(avNum*1000))
    oscillTest=oscillTest+forceArr[i,j]*oldForce[i,j]
    if (forceArr[i,j]>maxForce) maxForce=forceArr[i,j]
    if ((0-forceArr[i,j])>maxForce) maxForce=-forceArr[i,j]
  }
  if (i==1) printf("% .8f % .8f % .8f\n",forceArr[1,1],forceArr[1,2],forceArr[1,3]) > "oldAdjForces"
  if (i>1) printf("% .8f % .8f % .8f\n",forceArr[i,1],forceArr[i,2],forceArr[i,3]) >> "oldAdjForces"
}
print "oscillTest ",oscillTest >> "oldAdjForces"
if (oscillTest<0) {
  maxAtomMove = maxAtomMove*0.5
  print maxAtomMove > "maxMove"
}
if (oscillTest>0) {
  maxAtomMove = maxAtomMove*1.2
  print maxAtomMove > "maxMove"
}
print "maxAtomMove ",maxAtomMove >> "oldAdjForces"
forceMult=maxAtomMove/maxForce
for (i=1;i<=numAtoms;i++) {
  for (j=1;j<=3;j++) {
    newarr[i,j]=oldarr[i,j]+forceMult*forceArr[i,j]
  }
}
}
#####

#####normal routine for Verlet #####
if (DRP==0) {
  for (i=1;i<=numAtoms;i++) {
    for (j=1;j<=3;j++) {
# conversions here take force to J/angstrom, 1E20 converts to kg angstroms / s^2, then mult time (s^s) and divide by weight in kg
to get angstroms
        forceArr[i,j]=1E20*forceArr[i,j]*627.509*(4184/(0.529177*avNum))*(timestep^2)/(weight[i]/(avNum*1000))
#       if ((diag>1) && (i==1)) print "i,weight[i],forceArr[i,1],forceArr[i,2],forceArr[i,3]" >> "diagnostics"
#       if (diag>1) print i,weight[i],forceArr[i,1],forceArr[i,2],forceArr[i,3] >> "diagnostics"
        newarr[i,j]=oldarr[i,j]+damping*(oldarr[i,j]-olderarr[i,j])+forceArr[i,j]
        if ((i==fixedatom1) || (i==fixedatom2) || (i==fixedatom3) || (i==fixedatom4)) newarr[i,j]=oldarr[i,j]
#turn around atoms outside the box
        if (boxon==1) {
          if (newarr[i,j]>boxsize) if (oldarr[i,j]>olderarr[i,j]) newarr[i,j]=oldarr[i,j]+damping*(olderarr[i,j]-oldarr[i,j])+forceArr[i,j]
          if (newarr[i,j]<-1*boxsize) if (oldarr[i,j]<olderarr[i,j]) newarr[i,j]=oldarr[i,j]+damping*(olderarr[i,j]-
oldarr[i,j])+forceArr[i,j]
        }
      }
    }
  }
  for (at=1;at<=numAtoms;at++) {
    atomVel=((oldarr[at,1]-newarr[at,1])^2 + (oldarr[at,2]-newarr[at,2])^2 + (oldarr[at,3]-newarr[at,3])^2)^.5
    KEnew=KEnew+0.5*weight[at]*(atomVel^2)/((timestep^2)*conver1)
  }
  KEave=0.5*KEold+0.5*KEnew
  Etotal=newPotEK+KEave
#still basing apparent Temperature on velocities from old vs older, even though the KE now represents an average of old and new
  if (diag==4) print runpointnum,"KEave",KEave,"apparent
Temperature",apparentTemp,"newPotEK",newPotEK,"Etotal",Etotal,"TotalSphereForce",sphereforcetotal,"density in
0.9r",density >> "vellist"
}
#####

```

```

print "%nproc=" processors
print "%mem=" memory
if (killcheck!=1) print "%chk=" checkpoint
if (nonstandard==0) {
  print "#p " method " force scf=(xqc,maxconven=155,fulllinear,nosym) "
  if (meth2=="unrestricted") print "guess=mix" #for unrestricted calculations
  if (meth2=="read") print "guess=tcheck" #for reading orbitals from check, sometimes faster, sometimes not
  print "pop=none "
  if (length(meth3)>2) print meth3
  if (length(meth4)>2) print meth4
}
if (nonstandard==1) {
  print "# "
  print "nonstd"
  system("cat nonstandard")
}
print ""
print title1,title2,title3,title4
print "runpoint ",runpointnum
print "runisomer ",isomernum
if (DRP==1) print "maxForce and forceMult and maxAtomMove",maxForce,forceMult,maxAtomMove
print ""
if (oniomult==0) print charge,multiplicity
if (oniomult>0) print charge,multiplicity,oniomcharge,oniomult
print numAtoms >> "traj"
print newPotentialE,title1,title2,title3,title4,"runpoint ",runpointnum,"runisomer ",isomernum >> "traj"
for (i=1;i<=numAtoms;i++) {
  printf("%s %.7f %.7f %.7f",atSym[i],newarr[i,1],newarr[i,2],newarr[i,3])
  printf("%s %.7f %.7f %.7f",atSym[i],newarr[i,1],newarr[i,2],newarr[i,3]) >> "traj"
  print "" >> "traj"
  if ((i>highlevel) && (i<=highlevel+linkatoms)) printf(" %s","M H")
  if (i>(highlevel+linkatoms)) printf(" %s","M")
  print ""
}
print ""
if (length(meth5)>2) print meth5
if (length(meth6)>2) print meth6
if (methodfilelines>=1) {
  for (i=1;i<=methodfilelines;i++) {
    getline < "methodfile"
    print $0
  }
}
if ((nmrtype>0) && (nmrdo==1)) {
  print "--link1--"
  print "%nproc=" processors
  print "%mem=" memory
  print "%chk=" checkpoint
  print "# " nmrmeth " nmr=giao geom=check"
  if (nmrmeth==method) print "guess=tcheck"
  if (length(meth7)>2) print meth7
  print ""
  print title1,title2,title3,title4
  print "runpoint ",runpointnum
  print "runisomer ",isomernum
  print ""
  print charge,multiplicity
}
print ""
if ((nmrtype>1) && (nmrdo==1)) {
  print "--link1--"

```

```

print "%nproc=" processors
print "%mem=" memory
print "%chk=" checkpoint
print "# " nmrmethod2 " nmr=giao geom=check"
if (length(meth7)>2) print meth7
print ""
print title1,title2,title3,title4
print "runpoint ",runpointnum
print "runisomer ",isomernum
print ""
print charge,multiplicity
}
print ""
if ((nmrtype>2) && (nmrdo==1)) {
print "--link1--"
print "%nproc=" processors
print "%mem=" memory
print "%chk=" checkpoint
print "# " nmrmethod3 " nmr=giao geom=check"
if (length(meth7)>2) print meth7
print ""
print title1,title2,title3,title4
print "runpoint ",runpointnum
print "runisomer ",isomernum
print ""
print charge,multiplicity
}
print ""

if ((nmrcc==1) && (nmrdo==1)) {
print "CCSD(T) NMR calculation" > "ZMAT"
for (i=1;i<=numAtoms;i++) {
printf("%s %.7f %.7f %.7f",atSym[i],newarr[i,1],newarr[i,2],newarr[i,3]) >> "ZMAT"
print "" >> "ZMAT"
}
print "" >> "ZMAT"
print "*ACES2(CALC=CCSD[T],PROP=NMR,BASIS=dzp)" >> "ZMAT"
print "ABCDTYPE=AObasis,TREAT_PERT=SEQUENTIAL,CC_PROG=ECC" >> "ZMAT"
print "COORD=CARTESIAN" >> "ZMAT"
print "MEM_UNIT=GB,MEMORY=2)" >> "ZMAT"
print "" >> "ZMAT"
}
}

function Distance(Atom1,Atom2) {
return sqrt((oldarr[Atom1,1]-oldarr[Atom2,1])^2+(oldarr[Atom1,2]-oldarr[Atom2,2])^2+(oldarr[Atom1,3]-oldarr[Atom2,3])^2)
}

```

## Program progcfour

This module calls an outside calculation with CFOUR but was not used for the current paper and its presence is not needed to reproduce the current work. Its listing was published in the SI for a previous paper: Biswas, B.; Singleton, D. A. *J. Am. Chem. Soc.* **2015**, *137*, 14244-14247.

## Program randgen.c

This is compiled before use to give the service program *randgen*

```

#include <stdio.h>
#include <stdlib.h>

```

```

int a,b,c;
double d;

int product(int x, int y);

int main(void)
{
  int count=1;
  srand48(time (0));
  while (count<=100000)
  {
    d = drand48();
    printf ("%f\n", d);
    count++;
  }
  return 0;
}

```

### Program program when collecting PMF data

```

BEGIN {
firsttitle=1
getline < "isomernumber"
isomer=$1
}
/NO2/ {
  if (firsttitle==1) {
    printf("%s %s %s %s %s %s %s %s %s ",$1,$2,$3,$4,$6,$7,$8)
    runpoint=$6
  }
  firsttitle++
}
/Standard orientation/./Rotational constants/ {
  if (($1>.5) && ($1<99)) {
    A[$1]=$4;B[$1]=$5;C[$1]=$6
  }
}
#/before annihilation/ {
# printf("%s %.5f ",$1,$6)
# }

END {
  para=Distance(1,16)
  meta=Distance(2,16)
  if (Distance(6,16)<meta) meta=Distance(6,16)
  ortho=Distance(3,16)
  if (Distance(5,16)<ortho) ortho=Distance(5,16)
  ipso=Distance(4,16)
  Opara=Distance(1,17)
  if (Distance(1,18)<Opara) Opara=Distance(1,18)
  Ometa=Distance(2,17)
  if (Distance(2,18)<Ometa) Ometa=Distance(2,18)
  if (Distance(6,17)<Ometa) Ometa=Distance(6,17)
  if (Distance(6,18)<Ometa) Ometa=Distance(6,18)
  Oortho=Distance(3,17)
  if (Distance(3,18)<Oortho) Oortho=Distance(3,18)
  if (Distance(5,17)<Oortho) Oortho=Distance(5,17)
  if (Distance(5,18)<Oortho) Oortho=Distance(5,18)
  Oipso=Distance(4,17)
  if (Distance(4,18)<Oipso) Oipso=Distance(4,18)
  NitF=Distance(16,19)
  if (Distance(16,21)<NitF) NitF=Distance(16,21)
  if (Distance(16,22)<NitF) NitF=Distance(16,22)
}

```

```

if (Distance(16,23)<NitF) NitF=Distance(16,23)
BC=Distance(1,20)
if (Distance(2,20)<BC) BC=Distance(2,20)
if (Distance(3,20)<BC) BC=Distance(3,20)
if (Distance(4,20)<BC) BC=Distance(4,20)
if (Distance(5,20)<BC) BC=Distance(5,20)
if (Distance(6,20)<BC) BC=Distance(6,20)
choice=0
if ((Opara<Ometa) && (Opara<Oortho) && (Opara<NitF)) choice=1
if ((Ometa<Opara) && (Ometa<Oortho) && (Ometa<NitF)) choice=2
if ((Oortho<Ometa) && (Oortho<Opara) && (Oortho<NitF)) choice=3
if (Ometa<2) choice=2
if (Oortho<2) choice=3
if (choice==0) printf("%s %.3f %s %.3f %s %.3f %s %.3f %s %.2f %s %.2f
", "p", "para", "m", "meta", "o", "ortho", "i", "ipso", "NitForNO", "NitF", "BC", "BC)
if (choice==1) printf("%s %.3f %s %.3f %s %.3f %s %.3f %s %.2f %s %.2f
", "p", "para", "m", "meta", "o", "ortho", "i", "ipso", "Opara", "Opara", "BC", "BC)
if (choice==2) printf("%s %.3f %s %.3f %s %.3f %s %.3f %s %.2f %s %.2f
", "p", "para", "m", "meta", "o", "ortho", "i", "ipso", "Ometa", "Ometa", "BC", "BC)
if (choice==3) printf("%s %.3f %s %.3f %s %.3f %s %.3f %s %.2f %s %.2f
", "p", "para", "m", "meta", "o", "ortho", "i", "ipso", "Oortho", "Oortho", "BC", "BC)
if (runpoint>500000) {
    print "Too many points. XXXXXN"
#   system("date > nogo")
}
if (para<1.6) {
#   print "para product formed XXXX"
#   system("date > nogo")
}
if (meta<1.6) {
#   print "meta product formed XXXX"
#   system("date > nogo")
}
if (ortho<1.6) {
#   print "ortho product formed XXXX"
#   system("date > nogo")
}
if (ipso<1.6) {
#   print "ipso product formed XXXX"
#   system("date > nogo")
}
if (Opara<1.6) {
#   print "Opara product formed XXXX"
}
if (Ometa<1.6) {
#   print "Ometa product formed XXXX"
}
if (Oortho<1.6) {
#   print "Oortho product formed XXXX"
}
if (Oipso<1.6) {
#   print "Oipso product formed XXXX"
}
# if (NitF<1.6) {
#   print "NitF product formed XXXX"
#   system("date > nogo")
# }
if ((para>5) && (meta>5) && (ortho>5)) {
#   if ((para<5.2) || (para>5.25)) print "Dissociated to SM XXXX"
}

system("date '+%b:%d:%Y %T'")

```



```

system("tail -1 Echeck | grep XXXX")
}

function Distance(Atom1,Atom2) {
return sqrt((A[Atom1]-A[Atom2])^2 + (B[Atom1]-B[Atom2])^2 + (C[Atom1]-C[Atom2])^2)
}

function Angle(Atom1,Atom2,Atom3) {
value=((-
Distance(Atom1,Atom3)^2+Distance(Atom1,Atom2)^2+Distance(Atom2,Atom3)^2)/(2*Distance(Atom1,Atom2)*Distance(Atom2,Atom3)))
return acos(value)
}

function asin(x) { return (180/3.141592)*atan2(x, sqrt(1-x*x)) }

function acos(x) { return (180/3.141592)*atan2(sqrt(1-x*x), x) }

function atan(x) { return (180/3.141592)*atan2(x,1) }

function Dihedral(Atom1,Atom2,Atom3,Atom4) {
B1x=A[Atom2]-A[Atom1]
B1y=B[Atom2]-B[Atom1]
B1z=C[Atom2]-C[Atom1]
B2x=A[Atom3]-A[Atom2]
B2y=B[Atom3]-B[Atom2]
B2z=C[Atom3]-C[Atom2]
B3x=A[Atom4]-A[Atom3]
B3y=B[Atom4]-B[Atom3]
B3z=C[Atom4]-C[Atom3]
modB2=sqrt((B2x^2)+(B2y^2)+(B2z^2))
# yAx is x-coord. etc of modulus of B2 times B1
yAx=modB2*(B1x)
yAy=modB2*(B1y)
yAz=modB2*(B1z)
# CP2 is the crossproduct of B2 and B3
CP2x=(B2y*B3z)-(B2z*B3y)
CP2y=(B2z*B3x)-(B2x*B3z)
CP2z=(B2x*B3y)-(B2y*B3x)
termY=((yAx*CP2x)+(yAy*CP2y)+(yAz*CP2z))
# CP is the crossproduct of B1 and B2
CPx=(B1y*B2z)-(B1z*B2y)
CPy=(B1z*B2x)-(B1x*B2z)
CPz=(B1x*B2y)-(B1y*B2x)
termX=((CPx*CP2x)+(CPy*CP2y)+(CPz*CP2z))
dihed4=(180/3.141592)*atan2(termY,termX)
return dihed4
}

function killdyn(isomer) {
system("rm -f dyn")
}

```

### Program proganal when running product-forming trajectories

```

BEGIN {
firsttitle=1
getline < "isomernumber"
isomer=$1
}
/ NO2/ {

```

```

if (firsttitle==1) {
  printf("%s %s %s %s %s %s %s ",$1,$2,$3,$4,$6,$7,$8)
  printf(" %s %s %s ",$6,$7,$8) >> "fullDistList"
  runpoint=$6
}
firsttitle++
}
/Standard orientation/./Rotational constants/ {
  if (($1>.5) && ($1<99)) {
    A[$1]=$4;B[$1]=$5;C[$1]=$6
  }
}
#/before annihilation/ {
# printf("%s %.5f ",$1,$6)
# }

END {
  para=Distance(1,16)
  meta=Distance(2,16)
  if (Distance(6,16)<meta) meta=Distance(6,16)
  ortho=Distance(3,16)
  if (Distance(5,16)<ortho) ortho=Distance(5,16)
  ipso=Distance(4,16)
  Opara=Distance(1,17)
  if (Distance(1,18)<Opara) Opara=Distance(1,18)
  Ometa=Distance(2,17)
  if (Distance(2,18)<Ometa) Ometa=Distance(2,18)
  if (Distance(6,17)<Ometa) Ometa=Distance(6,17)
  if (Distance(6,18)<Ometa) Ometa=Distance(6,18)
  Oortho=Distance(3,17)
  if (Distance(3,18)<Oortho) Oortho=Distance(3,18)
  if (Distance(5,17)<Oortho) Oortho=Distance(5,17)
  if (Distance(5,18)<Oortho) Oortho=Distance(5,18)
  Oipso=Distance(4,17)
  if (Distance(4,18)<Oipso) Oipso=Distance(4,18)
  NitF=Distance(16,19)
  if (Distance(16,21)<NitF) NitF=Distance(16,21)
  if (Distance(16,22)<NitF) NitF=Distance(16,22)
  if (Distance(16,23)<NitF) NitF=Distance(16,23)
  BC=Distance(1,20)
  if (Distance(2,20)<BC) BC=Distance(2,20)
  if (Distance(3,20)<BC) BC=Distance(3,20)
  if (Distance(4,20)<BC) BC=Distance(4,20)
  if (Distance(5,20)<BC) BC=Distance(5,20)
  if (Distance(6,20)<BC) BC=Distance(6,20)
  if (Distance(6,16)<meta) BC=-BC
  choice=0
  if ((Opara<Ometa) && (Opara<Oortho) && (Opara<NitF)) choice=1
  if ((Ometa<Opara) && (Ometa<Oortho) && (Ometa<NitF)) choice=2
  if ((Oortho<Ometa) && (Oortho<Opara) && (Oortho<NitF)) choice=3
  if (Ometa<2) choice=2
  if (Oortho<2) choice=3
  if (choice==0) printf("%s %.3f %s %.3f %s %.3f %s %.3f %s %.2f %s %.2f
", "p", "para", "m", "meta", "o", "ortho", "i", "ipso", "NitForNO", "NitF", "BC", "BC)
  if (choice==1) printf("%s %.3f %s %.3f %s %.3f %s %.3f %s %.2f %s %.2f
", "p", "para", "m", "meta", "o", "ortho", "i", "ipso", "Opara", "Opara", "BC", "BC)
  if (choice==2) printf("%s %.3f %s %.3f %s %.3f %s %.3f %s %.2f %s %.2f
", "p", "para", "m", "meta", "o", "ortho", "i", "ipso", "Ometa", "Ometa", "BC", "BC)
  if (choice==3) printf("%s %.3f %s %.3f %s %.3f %s %.3f %s %.2f %s %.2f
", "p", "para", "m", "meta", "o", "ortho", "i", "ipso", "Oortho", "Oortho", "BC", "BC)
  printf("%s %.3f %s %.3f %s %.3f %s %.3f %s %.3f %s %.3f
", "p", "para", "m1", "Distance(2,16)", "o1", "Distance(3,16)", "i", "ipso", "o2", "Distance(5,16)", "m2", "Distance(6,16)) >> "fullDistList"

```

```

print "" >> "fullDistList"
if (runpoint>500000) {
  print "Too many points. XXXXX"
#  system("date > nogo")
}
if (para<1.5) {
  print "para product formed XXXX"
}
if (meta<1.5) {
  print "meta product formed XXXX"
}
if (ortho<1.5) {
  print "ortho product formed XXXX"
}
if (ipso<1.5) {
  print "ipso product formed XXXX"
}
if (Opara<1.6) {
  print "Opara product formed XXXX"
}
if (Ometa<1.6) {
  print "Ometa product formed XXXX"
}
if (Oortho<1.6) {
  print "Oortho product formed XXXX"
}
if (Oipso<1.6) {
  print "Oipso product formed XXXX"
}
# if (NitF<1.6) {
#   print "NitF product formed XXXX"
#   system("date > nogo")
# }
if ((para>5) && (meta>5) && (ortho>5)) {
  print "Dissociated to SM XXXX"
}

system("date '+%b:%d:%Y %T'")
system("tail -1 Echeck | grep XXXX")
}

function Distance(Atom1,Atom2) {
  return sqrt((A[Atom1]-A[Atom2])^2 + (B[Atom1]-B[Atom2])^2 + (C[Atom1]-C[Atom2])^2)
}

function Angle(Atom1,Atom2,Atom3) {
  value=((-
Distance(Atom1,Atom3)^2+Distance(Atom1,Atom2)^2+Distance(Atom2,Atom3)^2)/(2*Distance(Atom1,Atom2)*Distance(Atom2,Atom3)))
  return acos(value)
}

function asin(x) { return (180/3.141592)*atan2(x, sqrt(1-x*x)) }

function acos(x) { return (180/3.141592)*atan2(sqrt(1-x*x), x) }

function atan(x) { return (180/3.141592)*atan2(x,1) }

function Dihedral(Atom1,Atom2,Atom3,Atom4) {
  B1x=A[Atom2]-A[Atom1]
  B1y=B[Atom2]-B[Atom1]
  B1z=C[Atom2]-C[Atom1]

```

```

B2x=A[Atom3]-A[Atom2]
B2y=B[Atom3]-B[Atom2]
B2z=C[Atom3]-C[Atom2]
B3x=A[Atom4]-A[Atom3]
B3y=B[Atom4]-B[Atom3]
B3z=C[Atom4]-C[Atom3]
modB2=sqrt((B2x^2)+(B2y^2)+(B2z^2))
# yAx is x-coord. etc of modulus of B2 times B1
yAx=modB2*(B1x)
yAy=modB2*(B1y)
yAz=modB2*(B1z)
# CP2 is the crossproduct of B2 and B3
CP2x=(B2y*B3z)-(B2z*B3y)
CP2y=(B2z*B3x)-(B2x*B3z)
CP2z=(B2x*B3y)-(B2y*B3x)
termY=((yAx*CP2x)+(yAy*CP2y)+(yAz*CP2z))
# CP is the crossproduct of B1 and B2
CPx=(B1y*B2z)-(B1z*B2y)
CPy=(B1z*B2x)-(B1x*B2z)
CPz=(B1x*B2y)-(B1y*B2x)
termX=((CPx*CP2x)+(CPy*CP2y)+(CPz*CP2z))
dihed4=(180/3.141592)*atan2(termY,termX)
return dihed4
}

function killdyn(isomer) {
    system("rm -f dyn")
}

```

## progdyn.conf for running product-forming trajectories after the release of constraints

```

#This is the configuration file for PROGDYN. This file is read by progdynstarterHP and
# the awk programs proggenHP, prog1stpoint, prog2ndpoint, and progdynb.
#The programs won't read anything past the first blank line,
#and this file must end with a blank line.
#The program has a number of default values but they are unlikely to be what you want.
#Do not delete lines - rather, comment out lines for unwanted options.
#The values here are read repeatedly and most can be changed in the middle of running jobs
****The keywords are case sensitive. The following keywords should always be defined:****
****method, charge, multiplicity, memory, processors, title
**** method --The following word is copied exactly to the gaussian input file.
method ONIOM(M062X/6-311G*:PM3)
#To do a nonstandard route, make nonstandard 1. For normal calcs, use nonstandard 0 or else leave it out.
#Then make a file called "nonstandard" containing the nonstandard route with no extra lines.
nonstandard 0
# NMRoptions As is NMRtype=1 will add a section for an NMR calc at every NMRevery intervals. If you want to combine the
two use nonstandard
#NMRtype 1
#NMRmethod2 B97D/6-31G*
#NMRmethod LC-wPBE/6-31G*
#NMRmethod3 B3LYP/cc-pvtz
#NMRevery 4
#NMRrand 1
#NMRcc 1
#loadlimit 10.0
#geometry linear
rotationmode 0
**** method2 --The options here are restricted, unrestricted, and read. restricted is the default
#If the method is U..., put unrestricted here and the .com files will have in them guess=mix.

```

```

#If you put read here, the .com files will contain guess=tcheck, which sometimes makes things faster, sometimes not.
#The use of read requires a specifically defined checkpoint file name using the keyword checkpoint.
method2 restricted
charge 0
multiplicity 1
oniomchargemult 1 1
processors 3
**** memory --The following "word" is copied exactly to the gaussian input file after %mem=.
memory 7gb
**** killcheck and checkpoint -- You can use a specifically defined checkpoint file name by putting
#the name after the keyword checkpoint. This is necessary if you use the read option with method2.
#Defined checkpoint names are an unnecessary modest hassle and if you do not want to bother, use killcheck 1
killcheck 1
#checkpoint g09.chk
**** diagnostics -- 0 prints out nothing extra, 1 (default) prints out extra stuff to a
#file "diagnostics", 2 adds more stuff, 3 adds velocities to a file "vellist"
#4 adds the apparent temperature to vellist, but this is meaningless with quasiclassical calculations
diagnostics 4
**** title -- the title keyword must be followed by exactly four words
title NO2+Tol 101CH2Cl2IonP Oniom TrajFrom34
**** initialdis -- 0 (default) turns off displacement of the normal modes, so that all trajectories start from the same place
# and only the energies and signs of the motion in the modes are randomized
# 1 gives a flat distribution of displacements where all of the possible values are equally likely
# 2 (recommended) gives a QM-like gaussian distribution of displacements, so that displacements in the middle are more likely
that
# those at the end by 1/e
initialdis 0
**** timestep -- this is the time between points in the trajectory. Typical values would be 1E-15 or 0.5E-15 or 0.25E-15
timestep 1E-15
**** scaling -- this lets you scale the gaussian frequencies by a constant
scaling 1.0
temperature 298.15
**** thermostat 1 puts in a damping factor so as to bring the classical temperature toward the desired temperature.
**** use a thermostatmult between 0.95 and 1, typically 0.995, so the damping happens slowly - otherwise there will be
**** overadjustment in response to random variation
**** the thermostat is not exact. The second traj point ignores this, so it only applies to later points handled by progdynb.
thermostat 1
thermostatmult 0.999
**** method3, method4, method5, and method6 -- These keywords let you add extra lines to the gaussian input file.
#method3 and method4 add lines at the top of the input after the lines defining the method, and
#this is useful to implement things like the iop for mPW1k
#method5 and method6 add lines after the geometry, after a blank line of course
#only a single term with no spaces can be added, one per method line. Here are some examples to uncomment if needed
#method3 IOp(3/76=0572004280)
#method3 scrf=(pcm,solvent=ethanol)
#method3 scrf=(pcm,Solvent=dichloromethane)
#add the line below with big structures to get it to put out the distance matrix and the input orientation
method4 iop(2/9=2000)
#method4 iop(3/124=3)
#method4 scrf=(pcm,solvent=dms0,read)
#method5 radii=bondi
#method6
**** methodfile -- This keyword lets you add more complicated endings to gaussian input files
#such as a gen basis set. Put after the keyword the number of lines in a file you create called
#methodfile that contains the test you want to add to the end of the gaussian input
methodfile 0
**** numimag --This tells the program the number of imaginary frequencies in the starting structure.
#if 0, treats as ground state and direction of all modes is random
#if 1, motion along the reaction coordinate will start out in the direction defined by searchdir
#if 2, only lowest freq will go direction of searchdir and other imag mode will go in random direction
numimag 0
**** searchdir -- This keyword says what direction to follow the mode associated with the imaginary frequency.

```

```

#The choices are "negative" and "positive". Positive moves in the direction defined in the gaussian frequency calculation
#for the imaginary frequency, while negative moves in the opposite direction. The correct choice can be made either
#by a careful inspection of the normal modes and standard orientation geometry, or by trial and error.
searchdir positive
**** classical -- for quassiclassical dynamics, the default, use 0. for classical dynamics, use 1
#if there are no normal modes and the velocities are to be generated from scratch, use classical 2
classical 2
**** DRP, saddlepoint, and maxAtomMove --to run a DRP use 'DRP 1' in the line below, otherwise leave it at 0 or comment it
out
#the treatment of starting saddlepoints is not yet implemented so use saddlepoint no
#if DRP shows oscillations then decrease maxAtomMove
#DRP 1
#saddlepoint no
#maxAtomMove 0.01
**** cannonball -- The program can "fire" a trajectory from a starting position toward a particular target, such as toward
#a ts. To use this, make a file cannontraj with numAtom lines and three numbers per line that defines the vector
#for firing the trajectory, relative to the starting geometry's standard orientation. The number following cannonball sets
#the extra energy being put into the structure in kcal/mol
#cannonball 10
**** keepevery --This tells the program how often to write the gaussian output file to file dyn, after the first two points.
#Use 1 for most dynamics to start with, but use a higher number to save on disk space or molden loading time.
keepevery 99
**** highlevel --For ONIOM jobs, the following line states the number of highlevel atoms,
#which must come before the medium level atoms. Use some high value such as 999 if not using ONIOM
highlevel 18
**** fixedatom1, fixedatom2, fixedatom3, and fixedatom4 - These fix atoms in space.
#Fixing one atom serves no useful purpose and messes things up, while fixing two atoms
#fixes one distance and fixing three has the effect of fixing three distances, not just two
#in current form fixed atoms only are meant to work with no displacements, that is, initialdis=0
#fixedatom1 16
#fixedatom2 1
#fixedatom3 4
#fixedatom4 20
#applyforce 1 lets one push atoms together or appart - a positive force pushes them together
#format is applyforce force - with the units on force the same as in the Gaussian output file
#applyforce 2 or 3 or 4 applies a polynomial force centered at dist0. 2 is just harmonic, 3 is second order, 4 is third order
#format is applyforce 4 forcecoefficient dist0 forcecoefficient2 forcecoefficient3
#then use afatoms to chose the atoms with format afatoms firstatom secondatom [additional atoms]
#applyforce 2 0.1 2.1
#afatoms 16 1 2 3 4 5 6
#applyforceB 2 0.01 5.2
#afatomsB 8 15
#applyforceC 2 0.01 5.2
#afatomsC 8 15
#zeroatom pushes the numbered atom toward the origin with a small harmonic potential - good with boxon when you want to
keep the reaction in the center
#zeroatom 16
**** boxon and boxsize - With boxon 1, a cubic box is set such that atoms that reach the edge
#are reflected back toward the middle. Useful for dynamics with solvent molecules. This is a crude
#implementation that is ok for a few thousand femtoseconds but will not conserve energy long term.
#Set the box size so as to fit the entire initial molecule but not have too much extra room.
#The dimensions of the box are two times the boxsize, e.g. boxsize 7.5 leads to a box that is 15 x 15 x 15 angstroms
#boxon 1
#boxsize 11.2
**** sphereon and spheresize and sphereforce - uses a force to push atoms within a sphere. notice that if the atom is far outside
of
#the sphere then the force is large unless sphereforce is set small
sphereon 1
spheresize 12.9
sphereforce .01
**** displacements -- This keyword lets you set the initialdis of particular modes by using a series of lines of the format
#displacements NumberOfMode InitialDisForThatMode, as in the example below. You should be able to do as many of these as

```

```

you like
# you might consider this for rotations where a straight-line displacement goes wrong at large displacements
# The choices for InitialDisForThatMode are 0, 1, 2, and 10, where 10 does the same thing as 0 but is maintained for now
because
# a previous version of the program had a bug that made 0 not work.
#displacements 2 0
#displacements 3 0
#displacements 4 0
#displacements 5 0
#displacements 6 0
#displacements 7 0
#displacements 8 0
#displacements 9 0
#displacements 10 0
*** etolerance --This sets the allowable difference between the desired energy in a trajectory and the actual
#energy, known after point 1 from the potential energy + the kinetic energy in the initial velocities.
#The unit is kcal/mol and 1 is a normal value for mid-sized organic systems. For very large and floppy molecules, a larger value
#may be needed, but the value must stay way below the average thermal energy in the molecule (not counting zpe).
#If initialdis is not 0 and few trajectories are being rejected, decrease the value.
etolerance 9999999
*** controlphase --It is sometimes useful to set the phase of particular modes in the initialization of trajectories.
#The format is controlphase numberOfModeToControl positive or controlphase numberOfModeToControl negative.
#controlphase 2 positive
*** damping -- The damping keyword lets you add or subtract energy from the system at each point, by multiplying the
velocities
#by the damping factor. A damping of 1 has no effect, and since you mostly want to change the energy slowly, normal values
range
#from 0.95 to 1.05. The use of damping lets one do simulated annealing - you add energy until the structure is moving enough
#to sample the kinds of possibilities you are interested in, then you take away the energy slowly.
damping 1.000
#at a damping of .9995, the energy is cut in half in 693 points
*** reversetraj --This keyword sets the trajectories so that both directions from a transition state are explored.
reversetraj true

#updated Aug 9, 2007 to include the possibility of classical dynamics by the keyword classical
#updated Jan 2008 to include fixed atoms, ONIOM jobs, keepevery, and box size
#update Feb 2008 to include methodfile parameter
# updated Nov 2008 to allow for start without an initial freq calc using classical = 2
# update Aug 2010 to include etolerance, damping controlphase and reversetraj

```

## progdyn.conf for molecular dynamics generation of the PMF

```

#In this example, the distance between the N of the nitronium and the aromatic carbons is held in the area of 3.1 Å by a harmonic
potential – see the keywords applyforce and afatoms.
#This is the configuration file for PROGDYN. This file is read by progdynstarterHP and
# the awk programs proggenHP, prog1stpoint, prog2ndpoint, and progdynb.
#The programs won't read anything past the first blank line,
#and this file must end with a blank line.
#The program has a number of default values but they are unlikely to be what you want.
#Do not delete lines - rather, comment out lines for unwanted options.
#The values here are read repeatedly and most can be changed in the middle of running jobs
***The keywords are case sensitive. The following keywords should always be defined:***
***method, charge, multiplicity, memory, processors, title
*** method --The following word is copied exactly to the gaussian input file.
method ONIOM(M062X/6-311G*:PM3)
#To do a nonstandard route, make nonstandard 1. For normal calcs, use nonstandard 0 or else leave it out.
#Then make a file called "nonstandard" containing the nonstandard route with no extra lines.
nonstandard 0
# NMRoptions As is NMRtype=1 will add a section for an NMR calc at every NMRevery intervals. If you want to combine the
two use nonstandard

```

```

#NMRtype 1
#NMRmethod2 B97D/6-31G*
#NMRmethod LC-wPBE/6-31G*
#NMRmethod3 B3LYP/cc-pvtz
#NMRevery 4
#NMRrand 1
#NMRcc 1
#loadlimit 10.0
#geometry linear
rotationmode 0
**** method2 --The options here are restricted, unrestricted, and read. restricted is the default
#If the method is U..., put unrestricted here and the .com files will have in them guess=mix.
#If you put read here, the .com files will contain guess=tcheck, which sometimes makes things faster, sometimes not.
#The use of read requires a specifically defined checkpoint file name using the keyword checkpoint.
method2 restricted
charge 0
multiplicity 1
onionchargemult 1 1
processors 3
**** memory --The following "word" is copied exactly to the gaussian input file after %mem=.
memory 7gb
**** killcheck and checkpoint -- You can use a specifically defined checkpoint file name by putting
#the name after the keyword checkpoint. This is necessary if you use the read option with method2.
#Defined checkpoint names are an unnecessary modest hassle and if you do not want to bother, use killcheck 1
killcheck 1
#checkpoint g09.chk
**** diagnostics -- 0 prints out nothing extra, 1 (default) prints out extra stuff to a
#file "diagnostics", 2 adds more stuff, 3 adds velocities to a file "vellist"
#4 adds the apparent temperature to vellist, but this is meaningless with quasiclassical calculations
diagnostics 4
**** title -- the title keyword must be followed by exactly four words
title NO2+Tol 101CH2Cl2IonP Oniom Eq
**** initialdis -- 0 (default) turns off displacement of the normal modes, so that all trajectories start from the same place
# and only the energies and signs of the motion in the modes are randomized
# 1 gives a flat distribution of displacements where all of the possible values are equally likely
# 2 (recommended) gives a QM-like gaussian distribution of displacements, so that displacements in the middle are more likely
that
# those at the end by 1/e
initialdis 0
**** timestep -- this is the time between points in the trajectory. Typical values would be 1E-15 or 0.5E-15 or 0.25E-15
timestep 1E-15
**** scaling -- this lets you scale the gaussian frequencies by a constant
scaling 1.0
temperature 298.15
**** thermostat 1 puts in a damping factor so as to bring the classical temperature toward the desired temperature.
**** use a thermostatmult between 0.95 and 1, typically 0.995, so the damping happens slowly - otherwise there will be
**** overadjustment in response to random variation
**** the thermostat is not exact. The second traj point ignores this, so it only applies to later points handled by progdynb.
thermostat 1
thermostatmult 0.999
**** method3, method4, method5, and method6 -- These keywords let you add extra lines to the gaussian input file.
#method3 and method4 add lines at the top of the input after the lines defining the method, and
#this is useful to implement things like the iop for mPW1k
#method5 and method6 add lines after the geometry, after a blank line of course
#only a single term with no spaces can be added, one per method line. Here are some examples to uncomment if needed
#method3 IOp(3/76=0572004280)
method3 scf=(conver=5)
#method3 scrf=(pcm,Solvent=dichloromethane)
#add the line below with big structures to get it to put out the distance matrix and the input orientation
method4 iop(2/9=2000)
#method4 iop(3/124=3)
#method4 scrf=(pcm,solvent=dms0,read)

```



```

#method5 radii=bondi
#method6
**** methodfile -- This keyword lets you add more complicated endings to gaussian input files
#such as a gen basis set. Put after the keyword the number of lines in a file you create called
#methodfile that contains the test you want to add to the end of the gaussian input
methodfile 0
**** numimag --This tells the program the number of imaginary frequencies in the starting structure.
#if 0, treats as ground state and direction of all modes is random
#if 1, motion along the reaction coordinate will start out in the direction defined by searchdir
#if 2, only lowest freq will go direction of searchdir and other imag mode will go in random direction
numimag 0
**** searchdir -- This keyword says what direction to follow the mode associated with the imaginary frequency.
#The choices are "negative" and "positive". Positive moves in the direction defined in the gaussian frequency calculation
#for the imaginary frequency, while negative moves in the opposite direction. The correct choice can be made either
#by a careful inspection of the normal modes and standard orientation geometry, or by trial and error.
searchdir positive
**** classical -- for quassiclassical dynamics, the default, use 0. for classical dynamics, use 1
#if there are no normal modes and the velocities are to be generated from scratch, use classical 2
classical 2
**** DRP, saddlepoint, and maxAtomMove --to run a DRP use 'DRP 1' in the line below, otherwise leave it at 0 or comment it
out
#the treatment of starting saddlepoints is not yet implemented so use saddlepoint no
#if DRP shows oscillations then decrease maxAtomMove
#DRP 1
#saddlepoint no
#maxAtomMove 0.01
**** cannonball -- The program can "fire" a trajectory from a starting position toward a particular target, such as toward
#a ts. To use this, make a file cannontraj with numAtom lines and three numbers per line that defines the vector
#for firing the trajectory, relative to the starting geometry's standard orientation. The number following cannonball sets
#the extra energy being put into the structure in kcal/mol
#cannonball 10
**** keepevery --This tells the program how often to write the gaussian output file to file dyn, after the first two points.
#Use 1 for most dynamics to start with, but use a higher number to save on disk space or molden loading time.
keepevery 99
**** highlevel --For ONIOM jobs, the following line states the number of highlevel atoms,
#which must come before the medium level atoms. Use some high value such as 999 if not using ONIOM
highlevel 18
**** fixedatom1, fixedatom2, fixedatom3, and fixedatom4 - These fix atoms in space.
#Fixing one atom serves no useful purpose and messes things up, while fixing two atoms
#fixes one distance and fixing three has the effect of fixing three distances, not just two
#in current form fixed atoms only are meant to work with no displacements, that is, initialdis=0
#fixedatom1 16
#fixedatom2 1
#fixedatom3 4
#fixedatom4 20
#applyforce 1 lets one push atoms together or appart - a positive force pushes them together
#format is applyforce force - with the units on force the same as in the Gaussian output file
#applyforce 2 or 3 or 4 applies a polynomial force centered at dist0. 2 is just harmonic, 3 is second order, 4 is third order
#format is applyforce 4 forcecoefficient dist0 forcecoefficient2 forcecoefficient3
#then use afatoms to chose the atoms with format afatoms firstatom secondatom [additional atoms]
applyforce 2 0.1 3.1
afatoms 16 1 2 3 4 5 6
#applyforceB 2 0.01 5.2
#afatomsB 8 15
#applyforceC 2 0.01 5.2
#afatomsC 8 15
#zeroatom pushes the numbered atom toward the origin with a small harmonic potential - good with boxon when you want to
keep the reaction in the center
zeroatom 16
**** boxon and boxsize - With boxon 1, a cubic box is set such that atoms that reach the edge
#are reflected back toward the middle. Useful for dynamics with solvent molecules. This is a crude
#implementation that is ok for a few thousand femtoseconds but will not conserve energy long term.

```

```

#Set the box size so as to fit the entire initial molecule but not have too much extra room.
#The dimensions of the box are two times the boxsize, e.g. boxsize 7.5 leads to a box that is 15 x 15 x 15 angstroms
#boxon 1
#boxsize 11.2
**** sphereon and spheresize and sphereforce - uses a force to push atoms within a sphere. notice that if the atom is far outside
of
#the sphere then the force is large unless sphereforce is set small
sphereon 1
spheresize 12.9
sphereforce .01
**** displacements -- This keyword lets you set the initialdis of particular modes by using a series of lines of the format
# displacements NumberOfMode InitialDisForThatMode, as in the example below. You should be able to do as many of these as
you like
# you might consider this for rotations where a straight-line displacement goes wrong at large displacements
# The choices for InitialDisForThatMode are 0, 1, 2, and 10, where 10 does the same thing as 0 but is maintained for now
because
# a previous version of the program had a bug that made 0 not work.
#displacements 2 0
#displacements 3 0
#displacements 4 0
#displacements 5 0
#displacements 6 0
#displacements 7 0
#displacements 8 0
#displacements 9 0
#displacements 10 0
**** etolerance --This sets the allowable difference between the desired energy in a trajectory and the actual
#energy, known after point 1 from the potential energy + the kinetic energy in the initial velocities.
#The unit is kcal/mol and 1 is a normal value for mid-sized organic systems. For very large and floppy molecules, a larger value
#may be needed, but the value must stay way below the average thermal energy in the molecule (not counting zpe).
#If initialdis is not 0 and few trajectories are being rejected, decrease the value.
etolerance 9999999
**** controlphase --It is sometimes useful to set the phase of particular modes in the initialization of trajectories.
#The format is controlphase numberOfModeToControl positive or controlphase numberOfModeToControl negative.
#controlphase 2 positive
**** damping -- The damping keyword lets you add or subtract energy from the system at each point, by multiplying the
velocities
#by the damping factor. A damping of 1 has no effect, and since you mostly want to change the energy slowly, normal values
range
#from 0.95 to 1.05. The use of damping lets one do simulated annealing - you add energy until the structure is moving enough
#to sample the kinds of possibilities you are interested in, then you take away the energy slowly.
damping 1.000
#at a damping of .9995, the energy is cut in half in 693 points
**** reversetraj --This keyword sets the trajectories so that both directions from a transition state are explored.
reversetraj false

```

### **progdyn.conf for quasiclassical trajectories started from a toluene / NO<sub>2</sub><sup>+</sup>BF<sub>4</sub><sup>-</sup> PCM TS**

Here, we are only showing the active keywords.

```

method ONIOM(M062X/6-311G*:PM3)
rotationmode 2
method2 restricted
charge 0
multiplicity 1
oniomchargemult 1 1
processors 3
memory 7gb
killcheck 1
diagnostics 0
title NO2+Tol PCMTsA Oniom 298dis2
initialdis 2

```

```

timestep 1E-15
scaling 1.0
temperature 298.15
method3 scrf=(pcm,Solvent=dichloromethane)
method4 iop(2/9=2000)
methodfile 0
numimag 1
searchdir positive
classical 0
keepevery 99999
highlevel 18
keep the reaction in the center
etolerance 1
damping 1.000
reversetraj true

```

### progdynsam

```

BEGIN {
temp=298.15
if (pt<1) startpoint=6363
if (pt>1) startpoint=pt
line=0
printon=0
pointline=0
secondpoint=0
}

{
line++
if (line==1) numAtoms=$1
pointline++
if (printon==1) {
if ($1=="H") atWeight[pointline]=1.00783
if ($1=="C") atWeight[pointline]=12.0000
if ($1=="B") atWeight[pointline]=10.81
if ($1=="O") atWeight[pointline]=15.99940
if ($1=="F") atWeight[pointline]=18.9984
if ($1=="P") atWeight[pointline]=30.9738
if ($1=="S") atWeight[pointline]=31.972
if ($1=="N") atWeight[pointline]=14.0030740
if ($1=="Al") atWeight[pointline]=26.981
if ($1=="Cl") atWeight[pointline]=35.4527
if (($1=="C" || $1=="H" || $1=="O" || $1=="P" || $1=="N" || $1=="Cl" || $1=="B" || $1=="F" || $1=="S" ||
($1=="Al")) {
Arr0[pointline,0]=$1
Arr0[pointline,1]=$2
Arr0[pointline,2]=$3
Arr0[pointline,3]=$4
Arr1[pointline,0]=$1
Arr1[pointline,1]=$2
Arr1[pointline,2]=$3
Arr1[pointline,3]=$4
}
}
}
if (secondpoint==1) {
if (($1=="C" || $1=="H" || $1=="O" || $1=="P" || $1=="N" || $1=="Cl" || $1=="B" || $1=="F" || $1=="S" ||
($1=="Al")) {
Arr1[pointline,1]=$2-Arr1[pointline,1]
Arr1[pointline,2]=$3-Arr1[pointline,2]
}
}
}

```

```

    Arr1[pointline,3]=$4-Arr1[pointline,3]
  }
}
if ($8=="runisomer") {
  pointline=0
}
if ($7==startpoint) {
  pointline=0
  printon=1
}
if ($7==startpoint+1) {
  secondpoint=1
  pointline=0
  printon=0
}
if ($7>startpoint+1) {
  secondpoint=0
  printon=0
}
}

END {
  print numAtoms
  for (i=1;i<=numAtoms;i++) {
    print Arr0[i,0],Arr0[i,1],Arr0[i,2],Arr0[i,3],atWeight[i]
  }
  conver1=4.184E26
  srand()
  timestep=1E-15
  for (i=1;i<=100;i++) {
    newRand=rand()
    newRand2=rand()
    randArr[i]=newRand
    sign[i]=1
    if (newRand2<0.5) sign[i]=-1
  }
  for (i=1;i<=numAtoms;i++) {
    if ((Arr1[i,1]==0) && (Arr1[i,2]==0) && (Arr1[i,3]==0)) {
      for (j=1;j<=3;j++) {
        KE=-0.001987*temp*log(1-randArr[3*i+j])
        Vel=sign[3*i+j]*timestep*(2*KE*conver1/atWeight[i])^0.5
        Arr1[i,j]=Vel
      }
    }
    print Arr1[i,1],Arr1[i,2],Arr1[i,3]
  }
  printf("%s %i %i %s ", "generated from points", startpoint, startpoint+1, "in a trajectory, so no modes to print out")
  system("pwd")
  print "Total mode energy desired=",0
  for (i=1;i<=700;i++) {
    velsq= Arr1[i,1]^2+Arr1[i,2]^2+Arr1[i,3]^2
    KE=1E30*0.5*atWeight[i]*velsq/conver1
    KE=2.388E3*0.5*atWeight[i]*velsq
    #print i,KE
  }
  print ""
}

```

## Program progwhere

```

/ 1 run/ {
oldcurrent=""
finishtime=0;changetime=0;changedist=0
switches=0
shortestdistance=10;shortestpara=10;shortestmeta=10;shortestortho=10;shortestipso=10;short=10
oldshortestpara=10;oldshortestmeta=10;oldshortestortho=10;oldshortestipso=10
shortestrecent=10;reboundcount=0
olddist=10;
count18=0;count19=0;count2=0;count21=0;count22=0;count23=0;
}
/run/ {
olddist=dist
if (($9<$11) && ($9<$13) && ($9<$15)) {
  current="      para"
  dist=$9
  if (dist<shortestdistance) shortestdistance=dist
  if (dist<shortestpara) shortestpara=dist
}
if (($11<$9) && ($11<$13) && ($11<$15)) {
  current="      meta"
  dist=$11
  if (dist<shortestdistance) shortestdistance=dist
  if (dist<shortestmeta) shortestmeta=dist
}
if (($13<$9) && ($13<$11) && ($13<$15)) {
  current="      ortho"
  dist=$13
  if (dist<shortestdistance) shortestdistance=dist
  if (dist<shortestortho) shortestortho=dist
}
if (($15<$9) && ($15<$11) && ($15<$13)) {
  current="ipso"
  dist=$15
  if (dist<shortestdistance) shortestdistance=dist
  if (dist<shortestipso) shortestipso=dist
}
if ((olddist<2) && (dist>=2)) count2++
if (dist<shortestrecent) shortestrecent=dist
if ((dist>=2.3) && (shortestrecent<2)) {
  reboundcount++
  shortestrecent=10
}
if (current!=oldcurrent) {
  changetime=$5
  changedist=dist
  startcurrent=""
  if ($5>4) switches++
  print oldcurrent,switches,shortestdistance
  shortestdistance=10
}
oldcurrent=current
if ($5==4) startcurrent=current
}
/XXX/ {
  print "In XXX routine"
  print "final",current, switches, shortestdistance
  finishtime=$5
  if (startcurrent==current) print "No switch in this trajectory!!!!"
  print "data for last switch", "finishtime",finishtime,"changetime",changetime,"difference",finishtime-
changetime,"changedist",changedist,"switches",switches
}

```

```

if (current=="      para") {
  short=shortestmeta;if (shortestortho<short) short=shortestortho; if (shortestipso<short) short=shortestipso
  print "shortestmeta",shortestmeta,"shortestortho",shortestortho,"shortestipso",shortestipso,"shortest overall",short
}
if (current=="      meta") {
  short=shortestpara; if (shortestortho<short) short=shortestortho; if (shortestipso<short) short=shortestipso
  print "shortestpara",shortestpara,"shortestortho",shortestortho,"shortestipso",shortestipso,"shortest overall",short
}
if (current=="      ortho") {
  short=shortestpara; if (shortestmeta<short) short=shortestmeta; if (shortestipso<short) short=shortestipso
  print "shortestpara",shortestpara,"shortestmeta",shortestmeta,"shortestipso",shortestipso,"shortest overall",short
}
if (current=="      ipso") {
  short=shortestpara; if (shortestmeta<short) short=shortestmeta; if (shortestortho<short) short=shortestortho
  print "shortestpara",shortestpara,"shortestmeta",shortestmeta,"shortestortho",shortestortho,"shortest overall",short
}
print "count2  ",count2," reboundcount  ",reboundcount
finishtime=0;changetime=0;changedist=0;switches=0
shortestdistance=10
print "ended XXX routine"
}

```

## Program whamnit

```

cd ~
rm -f ~/regiocount
rm -f n8?*/seriesfile*
awk -f ~/progseries n872/dynfollowfile n873/dynfollowfile n874/dynfollowfile n875/dynfollowfile n876/dynfollowfile
n837/dynfollowfile n838/dynfollowfile > n837/seriesfile
awk -f ~/progseries n800/dynfollowfile n810/dynfollowfile n819/dynfollowfile n820/dynfollowfile n821/dynfollowfile
n839/dynfollowfile > n800/seriesfile
awk -f ~/progseries n801/dynfollowfile n811/dynfollowfile n822/dynfollowfile n840/dynfollowfile n841/dynfollowfile
n86*/dynfollowfile > n801/seriesfile
awk -f ~/progseries n854/dynfollowfile n855/dynfollowfile n856/dynfollowfile n857/dynfollowfile n858/dynfollowfile
n859/dynfollowfile > n854/seriesfile
awk -f ~/progseries n802/dynfollowfile n812/dynfollowfile n823/dynfollowfile > n802/seriesfile
awk -f ~/progseries n803/dynfollowfile n813/dynfollowfile n824/dynfollowfile n842/dynfollowfile > n803/seriesfile
awk -f ~/progseries n804/dynfollowfile n814/dynfollowfile n825/dynfollowfile > n804/seriesfile
awk -f ~/progseries n805/dynfollowfile n815/dynfollowfile n826/dynfollowfile > n805/seriesfile
awk -f ~/progseries n806/dynfollowfile n816/dynfollowfile n827/dynfollowfile > n806/seriesfile
awk -f ~/progseries n807/dynfollowfile n817/dynfollowfile n828/dynfollowfile > n807/seriesfile
awk -f ~/progseries n808/dynfollowfile n829/dynfollowfile > n808/seriesfile
awk -f ~/progseries n809/dynfollowfile n830/dynfollowfile > n809/seriesfile
awk -f ~/progseries n831/dynfollowfile n832/dynfollowfile > n831/seriesfile
awk -f ~/progseries n833/dynfollowfile n834/dynfollowfile > n833/seriesfile
awk -f ~/progseries n835/dynfollowfile n836/dynfollowfile > n835/seriesfile
cd ~/wham/wham
./wham 1.475 5.675 84 0.000001 298.15 0 metadatafile.nitrations ~/output.nitrationfull 6 23
cd
cat output.nitrationfull
cat ~/regiocount
cat ~/wham/wham/metadatafile.nitrations

```

## Program progseries

```

BEGIN {
countpara=0;countmeta=0;countortho=0;countipso=0;counttotal=0
oldfilename=""
switches=-1
current="";oldclosest=""

```

```

currentop=""
oldop=""
opswiches=-1
}
/run/ {
if (oldfilename!=FILENAME) {
  if (counttotal>0) {
    pp=int(.5+100*countpara/counttotal)
    pm=int(.5+100*countmeta/counttotal)
    po=int(.5+100*countortho/counttotal)
    pi=int(.5+100*countipso/counttotal)
    print oldfilename," ",countpara,countmeta,countortho,countipso," ",counttotal," ",pp,pm,po,pi,"
switches",switches," opswiches",opswiches >> "regiocount"
  }
  if (counttotal==0) print "" >> "regiocount"
  countpara=0;countmeta=0;countortho=0;countipso=0;counttotal=0;switches=-1;current="";oldclosest="";opswiches=-
1;oldop="";currentop=""
}
oldfilename=FILENAME
counttotal++
if (($9<$11) && ($9<$13) && ($9<$15)) {
  countpara++
  current="para"
  currentop="para"
}
if (($11<$9) && ($11<$13) && ($11<$15)) {
  countmeta++
  current="meta"
}
if (($13<$9) && ($13<$11) && ($13<$15)) {
  countortho++
  current="ortho"
  currentop="ortho"
}
if (($15<$9) && ($15<$11) && ($15<$13)) {
  countipso++
  current="ipso"
}
if (current!=oldclosest) switches++
if (currentop!=oldop) opswiches++
oldclosest=current; oldop=currentop
dist=$9
if ($11<dist) dist=$11
if ($13<dist) dist=$13
if ($15<dist) dist=$15
printf("%.1f %.3f", $5,dist)
print ""
}
END {
if (counttotal>0) {
  pp=int(.5+100*countpara/counttotal)
  pm=int(.5+100*countmeta/counttotal)
  po=int(.5+100*countortho/counttotal)
  pi=int(.5+100*countipso/counttotal)
}
print oldfilename," ",countpara,countmeta,countortho,countipso," ",counttotal," ",pp,pm,po,pi," switches",switches,"
opswiches",opswiches >> "regiocount"
}
}

```

**Program prog3dpath**

```

BEGIN {
A[1]=0.0;B[1]=-1.403;C[1]=-8
A[2]=1.198;B[2]=-.695;C[2]=-8
A[3]=1.198;B[3]=.695;C[3]=-8
A[4]=0.0;B[4]=1.403;C[4]=-8
A[5]=1.0;B[5]=0;C[5]=-5
A[6]=-1.198;B[6]=.695;C[6]=-8
A[7]=-1.198;B[7]=-.695;C[7]=-8
}
/run/ {
olderA=oldA;olderB=oldB;olderC=oldC
oldA=A[5];oldB=B[5];oldC=C[5]
delta=.1
optx=0;opty=0;optz=0
dp=$9;dm=$11;dor=$13;di=$15
if ((Error())^.5<delta) delta=(Error())^.5
#print "target distances",dp,dm,dor,di
#print "initial distances",Distance(1,5),Distance(2,5),Distance(3,5),Distance(4,5),"error",Error()
for (i=1;i<=14;i++) {
  olderror=Error()
  while (optz==0) {
    C[5]=C[5]+delta
    if (Error())>olderror) {
      optz=1
    }
    olderror=Error()
  }
  while (opty==0) {
    B[5]=B[5]+delta
    if (Error())>olderror) {
      opty=1
    }
    olderror=Error()
  }
  while (optx==0) {
    A[5]=A[5]+delta
    if (Error())>olderror) {
      optx=1
    }
    olderror=Error()
  }
  #print "x,y,z after passes",A[5],B[5],C[5]
  # print "intermediate distances",Distance(1,5),Distance(2,5),Distance(3,5),Distance(4,5),"error",Error(),i
  delta=.5*delta
  optx=0;opty=0;optz=0
}
countsinceflip++
secondderiv=olderA+A[5]-2*oldA
if ((secondderiv>.015) || (secondderiv<-.015)) {
  if ((A[5]<.05) && (A[5]>-.05) && (countsinceflip>10)) {
    A[2]=-A[2];A[3]=-A[3];A[6]=-A[6];A[7]=-A[7];
    A[5]=-A[5]
    countsinceflip=0
    print
    "XXXXXXXXXXXXXXXXXXXXXXXXXXXXXXXXXXXXXXXXXXXXXXXXXXXXXXXXXXXXXXXXXXXXXXXXXXXXX
XXXXXXXXXXXXXXXXXXXXXXXXXXXXX flipped"
  }
}
print "\t",A[5],"\t",B[5],"\t",C[5],"\t","error",Error()
printf("%.4f",A[5]) > "tempA"

```



```

printf("%.4f",B[5]) > "tempB"
printf("%.4f",C[5]) > "tempC"
}
END {
for (i=1;i<=5;i++) {
tA=A[5];tB=B[5];tC=C[5]
A[5]=3*A[5]-3*oldA+olderA;B[5]=3*B[5]-3*oldB+olderB;C[5]=3*C[5]-3*oldC+olderC;
olderA=oldA;olderB=oldB;olderC=oldC
oldA=tA;oldB=tB;oldC=tC
print "\t",A[5],"",B[5],"",C[5],"extrapolation"
printf("%.4f",A[5]) > "tempA"
printf("%.4f",B[5]) > "tempB"
printf("%.4f",C[5]) > "tempC"
}
print "" >> "tempA"
print "" >> "tempB"
print "" >> "tempC"
}

function Distance(Atom1,Atom2) {
return sqrt((A[Atom1]-A[Atom2])^2 + (B[Atom1]-B[Atom2])^2 + (C[Atom1]-C[Atom2])^2)
}

function Error() {
# if (Distance(6,5)<Distance(3,5)) return (dp-Distance(1,5))^2+(dm-Distance(7,5))^2+(dor-Distance(6,5))^2+(di-
Distance(4,5))^2
return (dp-Distance(1,5))^2+(dm-Distance(2,5))^2+(dor-Distance(3,5))^2+(di-Distance(4,5))^2
}

```

### Program nitrationPara1.m

```

X6 =
[0.8444,0.8445,0.8427,0.8439,0.8385,0.8347,0.8275,0.8187,0.8101,0.7998,0.7895,0.7808,0.7736,0.7666,0.7644,0.7655,0.7695,0.
7788,0.7878,0.7973];
Y6 = [-0.6949,-0.6976,-0.7005,-0.7018,-0.7028,-0.7027,-0.7026,-0.7028,-0.7021,-0.7023,-0.7036,-0.7037,-0.7053,-0.7063,-
0.7089,-0.7109,-0.7120,-0.7151,-0.7163,-0.7199];
Z6 = [-4.3812,-4.3774,-4.3753,-4.3732,-4.3717,-4.3699,-4.3684,-4.3676,-4.3668,-4.3663,-4.3671,-4.3685,-4.3717,-4.3754,-
4.3814,-4.3874,-4.3956,-4.4040,-4.4127,-4.4219];

xorthoa = -1.198; xorthob = 1.198; ypara = -1.403; yipso = 1.403; yme = 2.96; ymeta = -.695; yortho = .695
dbmult=.75;
depth=-8;
X1 = [xorthoa,0,0,0,xorthob,xorthob,0,xorthoa,xorthoa];
Y1 = [yortho,yipso,yme,yipso,yortho,ymeta,ypara,ymeta,yortho];
Z1 = [depth,depth,depth,depth,depth,depth,depth,depth,depth];
X2 = [dbmult*xorthoa,0];
Y2 = [dbmult*yortho,dbmult*yipso];
Z2 = [depth,depth];
X3 = [dbmult*xorthob,dbmult*xorthob];
Y3 = [dbmult*yortho,dbmult*ymeta];
Z3 = [depth,depth];
X4 = [0,dbmult*xorthoa];
Y4 = [dbmult*ypara,dbmult*ymeta];
Z4 = [depth,depth];

figure(2216)
hFig = figure(2216);
colormap(hFig,'jet')
brighten(.7);
shading interp;

```

```

set(gca, 'LooseInset', get(gca,'TightInset'))
set(hFig, 'Position', [1 1 1056 1056], 'color', [1 1 1])

plot3(X1,Y1,Z1,'b','LineWidth',8)
hold on;
plot3(X2,Y2,Z2,'b','LineWidth',8)
hold on;
plot3(X3,Y3,Z3,'b','LineWidth',8)
hold on;
plot3(X4,Y4,Z4,'b','LineWidth',8)
hold on;
plot3(X6,Y6,Z6,'r','LineWidth',4);
hold on;
axwidth=1;
Xi = -1.9; Xf = 2.5;
Yi = -3.2; Yf = yme+1.05*radiusc;
Zi = depth-radiuscz; Zf = -4.4;
fill3([Xi Xi Xf Xf],[Yi Yf Yf Yi],[Zi Zi Zi Zi],[1 1 .9]);
fill3([Xf Xf Xf Xf],[Yi Yf Yf Yi],[Zi Zi Zf Zf],[1 1 .9]);
fill3([Xi Xi Xf Xf],[Yf Yf Yf Yf],[Zi Zf Zf Zi],[1 1 .9]);
hold on;

[x y z]=sphere;
radiusc=.5;
radiuscz=.5;
ptalpha=.5;
salpha=.2;
surf(radiusc*x-1.21,radiusc*y+.7,radiuscz*z+depth,'facealpha',salpha,'edgealpha',ptalpha,'cdatamapping','direct','facecolor','k');
surf(radiusc*x,radiusc*y+1.4,radiuscz*z+depth,'facealpha',salpha,'edgealpha',ptalpha,'cdatamapping','direct','facecolor','k');
surf(radiusc*x+1.21,radiusc*y+.7,radiuscz*z+depth,'facealpha',salpha,'edgealpha',ptalpha,'cdatamapping','direct','facecolor','k');
surf(radiusc*x+1.21,radiusc*y-.7,radiuscz*z+depth,'facealpha',salpha,'edgealpha',ptalpha,'cdatamapping','direct','facecolor','k');
surf(radiusc*x,radiusc*y-1.4,radiuscz*z+depth,'facealpha',salpha,'edgealpha',ptalpha,'cdatamapping','direct','facecolor','k');
surf(radiusc*x-1.21,radiusc*y-.7,radiuscz*z+depth,'facealpha',salpha,'edgealpha',ptalpha,'cdatamapping','direct','facecolor','k');
surf(radiusc*x,radiusc*y+2.95,radiuscz*z+depth,'facealpha',salpha,'edgealpha',ptalpha,'cdatamapping','direct','facecolor','k');
%first and last point of arrays
radpt=.5;
radptz=.5;
numglobes = 100; numpts = numel(X6); oldpoint = 1;
for t=1:numglobes-2;
    thispt = 1+round((numpts-1)*(t/(numglobes-1)));
    if ((X6(thispt)-X6(oldpoint))^2 + (Y6(thispt)-Y6(oldpoint))^2 + (Z6(thispt)-Z6(oldpoint))^2)^.5 > .5;

surf(radpt*x+X6(thispt),radpt*y+Y6(thispt),radptz*z+Z6(thispt),'facealpha',.08,'edgealpha',.2,'cdatamapping','direct','facecolor','g');
    oldpoint = thispt;
end;
end;
surf(radpt*x+X6(1),radpt*y+Y6(1),radptz*z+Z6(1),'facealpha',salpha/1.2,'edgealpha',ptalpha/1.2,'cdatamapping','direct','facecolor','g');
surf(radpt*x+X6(numel(X6)),radpt*y+Y6(numel(X6)),radptz*z+Z6(numel(X6)), 'facealpha',.3,...
    'edgealpha',ptalpha,'cdatamapping','direct','facecolor','g');
plot3([X6(numel(X6)) 0],[Y6(numel(X6)) ypara],[Z6(numel(X6)) depth],'b','LineWidth',8);

view(-65,25)

axis('manual',[-2.5,2.5,-3.6,yme+1.1*radiusc,depth-1.1*radiuscz,-3.7])

set(gca,'XTick',[-2 -1 0 1 2], 'xticklabel',{' ',' ',' ',' '}, 'TickLength',[0.00 0.00])
set(gca,'YTick',[-2 -1 0 1 2 3], 'yticklabel',{' ',' ',' ',' ',' '}, 'TickLength',[0.00 0.00])
set(gca,'zTick',[-8 -6 -4 -2 0 2], 'zticklabel',{' ',' ',' ',' ',' '}, 'TickLength',[0.00 0.00])
set(gca,'LineWidth',axwidth)
set(gca,'xgrid','on','ygrid','on','zgrid','on')

```

```

set(gca,'FontSize',32)
set(gca,'PlotBoxAspectRatio',[.66 1 .64])
set(gca,'projection','perspective')
set(gca,'position',[.06 .06 .92 .92])
set(gca,'GridLineStyle',':')
set(gca,'color',[1 1 1])
set(gca,'XColor','w','YColor','w','ZColor','w')

```

## Program Suite PROGMC

PROGMC is a new program created to run efficient Monte Carlo calculations on the system containing toluene /  $\text{NO}_2^+\text{BF}_4^-$  / 101  $\text{CH}_2\text{Cl}_2$  system. Aspects of the program are recognizably *ad hoc*, but we envision that future modifications of the program will be usable on diverse systems.

A full listing of the subprograms of PROGMC is given below. To allow the reader to understand or make use of PROGMC, we describe here first the overall structure of the program.

The master control program for Monte Carlo, in the form of a Unix Shell Script, is called *progMC*. For a user to start to use *progMC*, some early lines in it that assign the scratch space and the location of the program files and input files would have to be modified for the local environment. These lines are between lines 12 and 21 and should be apparent. The location of the scratch space is usually passed to *progMC* as a parameter.

*progMC* takes as input files:

*geo* - This file contains the initial geometry at the beginning and later the current accepted geometry. Its format is line1: number of atoms; line 2: optional, often contains a title; line 3-end: the atoms and their positions in Cartesian coordinates. Here is an example:

```

18
NO2+Tol 101CH2Cl2IonP Oniom MonteCarlo runpoint 31398
C -1.2617403 0.1734595 1.7107956
C -0.2553121 -0.5054263 2.4640648
C 0.5521703 0.2290144 3.3654142
C 0.3782197 1.6373306 3.4257961
C -0.5518774 2.3254313 2.5924738
C -1.3446008 1.5460692 1.7229427
C 1.1698044 2.4529314 4.3843350
H -1.8962769 -0.4103785 1.0535189
H -0.2796489 -1.5907112 2.3450544
H 1.1595708 -0.3281763 4.1250153
H -0.6235700 3.3948345 2.5621955
H -2.1326424 1.9681938 1.0652780
H 1.2599393 2.0587910 5.4511793
H 0.9502583 3.4864759 4.4010777
H 2.2661395 2.3883560 4.0664127
N 0.1562194 0.6631665 -0.0922596
O 1.1591170 1.0349781 0.2849730
O -0.5782311 0.4442340 -0.9938770

```

*progmc.conf* – This is a file giving a variety of configuration options, called on by many of the subprograms. A *progmc.conf* example is listed below and contains explanations of the program options.

*progMC* calls the following programs:

*progmb* - An awk program that takes random steps from *geo* and generates subsequent Gaussian input files  
*progEcheck* – This awk program pulls the energy from Gaussian output files, adjusts the energy by any biasing potentials or the potential that holds the sphere of molecules together, and decides if the new energy and geometry should be accepted.  
*proganal* – A program to analyze the latest point and extract data. This program must be redone for each new system. *proganal* creates the output to *mcfollowfile*

*progMC* has the following output files:

*runpointnumber* – a running tab of the point in the chain of geometries

*Elist* – a list of all accepted energies  
*energy* – the latest energy  
*testgeo* – the latest test geometry. If the energy of testgeo is accepted, testgeo is moved to geo  
*latestmcrun* and *latestmcrun2* – the Gaussian output file from the latest and previously accepted points  
*mcfollowfile* – the output from proganal, records selected data from the successful points but not the unsuccessful points  
*traj* – a file containing the full set of accepted geometries for a Monte Carlo run  
*vellist* – output containing the density of the sphere and the amount of energy used to maintain the sphere, for each successful point  
 A number of files starting with 'temp' are created then later erased.

The following helper programs were used for the current study.

*whamnitmc* – a shell script that extracts data from the mcfollowfile files, sets up and runs wham to calculate the PMF, and keeps track of some general aspects of trajectories  
*proseriesmc* – an AWK script used by whamnitmv to extract data from the mcfollowfile files  
*wham* – a program from Grossfield, Alan, "WHAM: the weighted histogram analysis method", version 2.0.9, <http://membrane.urmc.rochester.edu/content/wham> that performs the wham analysis

## Program progMC

```
#!/bin/bash
#progMC started 12/21/2015
#
#          OUTLINE
# A. initialize to perform Gaussian jobs, set the scratch, program, and other directories, remove errant control files
# B. use progMC to read in the geometry from file geo. progMC then generates a new point and sets up g09.com
# C. progEcheck then checks to see if the new geometry is acceptable, based on new energy versus energy in file energy
#   If this is the first point, the energy is assigned as huge so the next point is accepted
#   If the new point is accepted then the new point is placed in file geo and the new energy is placed in file energy and proganal
is run
# D. go to B
#
AAAAAAAAAAAAAAAAAAAAAAAAAAAAAAAAAAAAAAAAAAAAAAAAAAAAAAAAAAAAAAAAAAAAAAAAAAAAAAAAAAAAAAAAAAAAAAAAAAAAAAAAAAAA
AAAAAAAAAAAAAAAAAAAAAAAAAAAAAAAAAAAAAAAAAAAAAAAAAAAAAAAAAAAAAAAAAAAAAAAAAAAAAAAAAAAAAAAAAAAAAAAAAAAAAAAAAAAA
AAAA
#origdir, randdir, scratchdir, g09root, logfile all may need varied from system to system and assigned here or by program calling
this one
export LC_ALL=C
echo $1
scratchdir=$1
export g09root=/software/lms/g09_D01
. $g09root/g09/bsd/g09.profile
origdir=`pwd`
cd $origdir
logfile=docslog
randdir=/bin
programdir=/binmc
echo
echo ORIGDIR at the beginning of run:
echo $origdir
ls $origdir
echo
echo SCRATCHDIR at the beginning of run:
echo $scratchdir
ls $scratchdir
echo
echo PROGRAMDIR at the beginning of run:
echo $programdir
ls $programdir

rm -f nogo # assume that if someone is starting a job, they want it to go.
rm -f diagnostics goingwell tempdone # diagnostics contains extra info from previous runs, other two files are from older
versions of progdy
```

```

cd $origdir
if (test -s runpointnumber) then
  echo "skipping start and continuing from previous runs"
else
  echo 1 > runpointnumber
fi
if (test -f energy) then
  echo "we have an energy in place"
  cat energy
else
  echo 999999999999 > energy
fi
if (test -s progmc.conf) then
  echo "we have a progmc.conf"
else
  echo "no progmc.conf"
  exit 9
fi
if (test -s g09.com) then
  sed -i '/guess=tcheck/d' g09.com # no chk file on first point
fi
rm -f latestmcrun # just using this as a signal that we are on the first point of submission

while (true)
do
#
BBBBBBBBBBBBBBBBBBBBBBBBBBBBBBBBBBBBBBBBBBBBBBBBBBBBBBBBBBBBBBBBBBBBBBBBBBBBBBBBBBBB
BBBBBBBBBBBBBBBBBBBBBBBBBBBBBBBBBBBBBBBBBBBBBBBBBBBBBBBBBBBBBBBBBBBBBBBBBBBBBBBB
  rm -f $scratchdir/goingwell $scratchdir/goodenergy
  cd $origdir
  if (test -s latestmcrun) then
    awk -f $programdir/progmcb geo > g09.com
  else
    awk -f $programdir/progmcb geo > g09.com
    sed -i '/guess=tcheck/d' g09.com # no chk file on first point
  fi
  if (test -s g09.com) then
    cd $scratchdir
    cp $origdir/g09.com $scratchdir/g09.com
    $g09root/g09/g09 $scratchdir/g09.com > $scratchdir/g09.log
    cd $origdir
    grep 'Normal termination' $scratchdir/g09.log > $scratchdir/goingwell
  else
    echo "g09.com not generated"
    break
  fi
  if (test -s $scratchdir/goingwell) then
    cp $scratchdir/g09.log latestmcrun
  else
    echo "some problem in middle of gaussian job"
    cp $scratchdir/g09.log $origdir/g09.log
    break
  fi
#
CCCCCCCCCCCCCCCCCCCCCCCCCCCCCCCCCCCCCCCCCCCCCCCCCCCCCCCCCCCCCCCCCCCCCCCCCCCCCCCC
CCCCCCCCCCCCCCCCCCCCCCCCCCCCCCCCCCCCCCCCCCCCCCCCCCCCCCCCCCCCCCCCCCCCCCCCCCCC
  rm -f goodenergy
  awk -f $programdir/progEcheck latestmcrun
  if (test -s goodenergy) then
    awk -f $programdir/proganal latestmcrun >> mcfollowfile
    cat testgeo >> traj

```

```

    cp testgeo geo
    cp latestmcrun latestmcrun2
    cat energy >> Elist
    cp goodenergy energy
fi
cp runpointnumber $scratchdir/temp533
awk 'BEGIN {getline;i=$1+1;print i}' $scratchdir/temp533 > runpointnumber
rm $scratchdir/temp533

# here is a cool link that lets you interupt the dynamics with a short job, then
# it automatically goes back to the dynamics just make the file 'detour' and it
# will delete detour, run run.com, then go back to dynamics
if (test -f detour) then
    rm detour
    date >> $logfile
    cat run.com >> $logfile
    cp run.log temp.log
    cd $scratchdir
    $g09root/g09/g09 $origdir/run.com > $origdir/run.log
    cd $origdir
fi

#stop it all nicely by creating a nogo file
if (test -f nogo) then
    break
fi

#no obvious reason to have an mc run quit on its own if everything is working ok
#
END_of_C_Loop____END_of_C_Loop____END_of_C_Loop____END_of_C_Loop____END_of_C_Loop____END_of_C_L
oop____
done
exit 0

```

## Program progmcB

```

BEGIN {
#Dec 21 2015
#This main routine for generating .com files by Monti-Carlo
#setting values for parameters such that program fails if there are no parameters
# do not change these - rather, change progmc.conf to set the parameters
temp=0.0;memory=20000000;
diag=1; checkpoint="g09.chk"; boxon=0
boxsize=10; title1="you"; title2="need"
title3="a"; title4="progmc.conf"; processors=1; highlevel=99999; linkatoms=0
nonstandard=0
oniomcharge=0; oniommult=0
applypotential=0; zeroatomon=0
sphereon=0; spheresize=999; sphereforceK=0.01
moleculecount=0

#initialization
srand(PROCINFO["pid"])
i=1;j=1;k=1
c=29979245800; h=6.626075E-34; avNum=6.0221415E23
RgasK=0.00198588; RgasJ=8.31447; pi=3.14159265359
numAtoms=0; atomnumber=0
conver1=4.184E26 #dividing by this converts amu angstrom^2 /s^2 to kcal/mol
OFS=" "

# read progdyn.conf for configuration info

```

```

blankLineTester=10
while (blankLineTester>1) {
  getline < "progmc.conf"
  if ($1=="method") method=$2
  if ($1=="method2") meth2=$2
  if ($1=="charge") charge=$2
  if ($1=="multiplicity") multiplicity=$2
  if ($1=="onionchargemult") {
    onioncharge=$2
    oniommult=$3
  }
  if ($1=="memory") memory=$2
  if ($1=="processors") processors=$2
  if ($1=="checkpoint") checkpoint=$2
  if ($1=="diagnostics") diag=$2
  if ($1=="temperature") temp=$2
  if ($1=="mcstepsize") mcstep=$2
  if ($1=="lengthstep") lengthstep=$2
  if ($1=="anglestep") anglestep=$2
  if ($1=="mcmolrotangle") mcmolrotangle=$2
  if ($1=="molecule") {
    moleculecount++
    molAtoms[moleculecount]=NF-2
    for (i=1;i<NF-1;i++) {
      molecule[moleculecount,i]=$ (i+1)
    }
    molStep[moleculecount]=$NF
  }
  if ($1=="method3") meth3=$2
  if ($1=="method4") meth4=$2
  if ($1=="method5") meth5=$2
  if ($1=="method6") meth6=$2
  if ($1=="method7") meth7=$2
  if ($1=="highlevel") highlevel=$2
  if ($1=="linkatoms") linkatoms=$2
  if ($1=="boxon") boxon=$2
  if ($1=="boxsize") boxsize=$2
  if ($1=="sphereon") sphereon=$2
  if ($1=="spheresize") spheresize=$2
  if ($1=="sphereforce") sphereforceK=$2
  if ($1=="methodfile") methodfilelines=$2
  if ($1=="killcheck") killcheck=$2
  if ($1=="nonstandard") nonstandard=$2
  if ($1=="applypotential") {
    apforce=$2; apforceX0=$3
  }
  if ($1=="apatoms") {
    for (i=1;i<8;i++) {
      if ($(i+1)>0) apatom[i]=$ (i+1)
    }
  }
  if ($1=="applypotentialplane") {
    apforceplane=$2; apforceplaneX0=$3
  }
  if ($1=="applaneatoms") {
    for (i=1;i<8;i++) {
      if ($(i+1)>0) afplaneatoms[i]=$ (i+1)
    }
  }
  if ($1=="zeroatom") {
    zeroatomon=1
    zeroatom=$2
  }
}

```

```

    zeroatmpotential=$3
  }
  if ($1=="title") {
    title1=$2
    title2=$3
    title3=$4
    title4=$5
  }
  blankLineTester=length($0)
}

#for (i=1;i<=moleculecount;i++) {
# for (j=1;j<=molAtoms[i];j++) {
#   print molecule[i,j]
#   }
# print molStep[i]
# }

if (diag>=1) print "***** starting progdynb *****" >> "diagnostics"
if (diag>=1) print "method,charge,multiplicity,memory" >> "diagnostics"
if (diag>=1) print "method,charge,multiplicity,memory" >> "diagnostics"
if (diag>=1) print "processors,checkpoint,title" >> "diagnostics"
if (diag>=1) print "processors,checkpoint,title1,title2,title3,title4" >> "diagnostics"

# get number of atoms and geometry from file geo
getline < "geo"
numAtoms=$1
getline < "geo"
for (i=1;i<=numAtoms;i++) {
  getline < "geo"
  atSym[i]=$1
  oldarr[i,1]=$2; oldarr[i,2]=$3; oldarr[i,3]=$4
  if (atSym[i]=="H") atRadius[i]=1.2
  if (atSym[i]=="B") atRadius[i]=1.8
  if (atSym[i]=="C") atRadius[i]=1.7
  if (atSym[i]=="N") atRadius[i]=1.55
  if (atSym[i]=="O") atRadius[i]=1.52
  if (atSym[i]=="F") atRadius[i]=1.47
  if (atSym[i]=="Cl") atRadius[i]=1.75
}

# record atom velocities for IVR analysis. This is actually the velocity in the previous run, which is the easiest to calculate.
getline < "runpointnumber"
runpointnum = $1
}

#pull out the potential energy
/SCF Done/ || /EUMP2 =/ || / Energy=/ || /ONIOM:/ {
  if (($1=="Energy=") && ($3=="NIter=")) newPotentialE=$2
  if ($1=="SCF") newPotentialE=$5
  if ($2=="extrapolated") newPotentialE=$5
  if ($1=="E2") {
    tempstring=$6
    split(tempstring, arr10, "D")
    newPotentialE=arr10[1]*(10^arr10[2])
  }
  newPotEK=(newPotentialE-potentialE)*627.509
}

END {
# idea for moving atoms within molecules - define each atom by a vector vs its nearest neighbor, displace by changing
# the length of the vector and by moving it in two orthogonal directions

```



```

for (k=1;k<=moleculecount;k++) {
# print atSym[molecule[k,1]]
  for (i=2;i<=molAtoms[k];i++) {
    atCon[i]=i-1
    for (m=1;m<i-1;m++) {
      if (Distance(molecule[k,m],molecule[k,i])<Distance(molecule[k,atCon[i]],molecule[k,i])) atCon[i]=m
    }
    vector[i,1]=oldarr[molecule[k,i],1]-oldarr[molecule[k,atCon[i]],1]
    vector[i,2]=oldarr[molecule[k,i],2]-oldarr[molecule[k,atCon[i]],2]
    vector[i,3]=oldarr[molecule[k,i],3]-oldarr[molecule[k,atCon[i]],3]
#   print atSym[molecule[k,i]],atCon[i],vector[i,1],vector[i,2],vector[i,3]
# now make one unit vector that is perpendicular to the first vector
    pervector1[i,1]=vector[i,2]/((vector[i,1]^2+vector[i,2]^2)^.5)
    pervector1[i,2]=-vector[i,1]/((vector[i,1]^2+vector[i,2]^2)^.5)
    pervector1[i,3]=0
#   print "perpendicular unit vector",pervector1[i,1],pervector1[i,2],pervector1[i,3]
# now make another unit vector perpendicular to both
    pervector2[i,1]=vector[i,2]*pervector1[i,3]-vector[i,3]*pervector1[i,2]
    pervector2[i,2]=vector[i,3]*pervector1[i,1]-vector[i,1]*pervector1[i,3]
    pervector2[i,3]=vector[i,1]*pervector1[i,2]-vector[i,2]*pervector1[i,1]
    norm=(pervector2[i,1]^2+pervector2[i,2]^2+pervector2[i,3]^2)^.5
    pervector2[i,1]=pervector2[i,1]/norm;pervector2[i,2]=pervector2[i,2]/norm;pervector2[i,3]=pervector2[i,3]/norm;
#   print "2nd perpendicular unit vector",pervector2[i,1],pervector2[i,2],pervector2[i,3]
    stepL=2*(rand()-.5)*lengthstep
    step1=2*(rand()-.5)*anglestep
    step2=2*(rand()-.5)*anglestep
    if (molecule[k,i]<7) {
      step1=step1/5;step2=step2/5;stepL=stepL/5
    }

vector[i,1]=vector[i,1]+step1*pervector1[i,1]+step2*pervector2[i,1]+stepL*vector[i,1]/Distance(molecule[k,atCon[i]],molecule[k,i])

vector[i,2]=vector[i,2]+step1*pervector1[i,2]+step2*pervector2[i,2]+stepL*vector[i,2]/Distance(molecule[k,atCon[i]],molecule[k,i])

vector[i,3]=vector[i,3]+step1*pervector1[i,3]+step2*pervector2[i,3]+stepL*vector[i,3]/Distance(molecule[k,atCon[i]],molecule[k,i])
#   print "newvector",atSym[molecule[k,i]],atCon[i],vector[i,1],vector[i,2],vector[i,3]
  }
# now we convert back to external cartesian coordinates
# atom 1 is just at its original position
# print atSym[molecule[k,1]],oldarr[molecule[k,1],1],oldarr[molecule[k,1],2],oldarr[molecule[k,1],3]
  for (i=2;i<=molAtoms[k];i++) {
    oldarr[molecule[k,i],1]=oldarr[molecule[k,atCon[i]],1]+vector[i,1]
    oldarr[molecule[k,i],2]=oldarr[molecule[k,atCon[i]],2]+vector[i,2]
    oldarr[molecule[k,i],3]=oldarr[molecule[k,atCon[i]],3]+vector[i,3]
#   print atSym[molecule[k,i]],oldarr[molecule[k,i],1],oldarr[molecule[k,i],2],oldarr[molecule[k,i],3]
  }
}

##### monte Carlo motion of atoms #####
# treat motion as steps of molecules and steps within molecules
# move each molecule by delX,delY,delZ - these are relatively big steps defined by molStep
# move all atoms but the first in a molecule, relatively, by mcstep
for (k=1;k<=moleculecount;k++) {
  delX=2*(rand()-.5)*molStep[k];delY=2*(rand()-.5)*molStep[k];delZ=2*(rand()-.5)*molStep[k]
  for (i=1;i<=molAtoms[k];i++) {
    delAtX=0;delAtY=0;delAtZ=0
    if (i>1) {
      delAtX=2*(rand()-.5)*mcstep;delAtY=2*(rand()-.5)*mcstep;delAtZ=2*(rand()-.5)*mcstep
    }
  }
}

```

```

    }
    newarr[molecule[k,i],1]=oldarr[molecule[k,i],1]+delX+delAtX;
    newarr[molecule[k,i],2]=oldarr[molecule[k,i],2]+delY+delAtY;
    newarr[molecule[k,i],3]=oldarr[molecule[k,i],3]+delZ+delAtZ;
  }
}

#Rotating molecules
#Originally tried rotating about center of mass but that give lopsided motion for things like CH2Cl2
#So switched to weighting by vdw radius
# now figure out the center of mass of each molecule and the coordinates of each molecule relative to the CM
for (k=1;k<=moleculecount;k++) {
  for (i=1;i<=molAtoms[k];i++) {
    CM[k,1]=CM[k,1]+newarr[molecule[k,i],1]*atRadius[molecule[k,i]]
    CM[k,2]=CM[k,2]+newarr[molecule[k,i],2]*atRadius[molecule[k,i]]
    CM[k,3]=CM[k,3]+newarr[molecule[k,i],3]*atRadius[molecule[k,i]]
    totalradius[k]=totalradius[k]+atRadius[molecule[k,i]]
  }
  CM[k,1]=CM[k,1]/totalradius[k];CM[k,2]=CM[k,2]/totalradius[k];CM[k,3]=CM[k,3]/totalradius[k];
# print "center of mass coordinates and totalradius",CM[k,1],CM[k,2],CM[k,3],totalradius[k] > "tempradius"
# figure out the angle to rotate around x, y, and z axes, in radians
angleX=pi*mcmolrotangle*2*(rand()-.5)/180
angleY=pi*mcmolrotangle*2*(rand()-.5)/180
angleZ=pi*mcmolrotangle*2*(rand()-.5)/180
maxDistToX=0;maxDistToY=0;maxDistToZ=0
  for (i=1;i<=molAtoms[k];i++) {
# change coordinates to center of mass
    CMgeo[k,i,1]=newarr[molecule[k,i],1]-CM[k,1]
    CMgeo[k,i,2]=newarr[molecule[k,i],2]-CM[k,2]
    CMgeo[k,i,3]=newarr[molecule[k,i],3]-CM[k,3]
    if ((CMgeo[k,i,2]^2+CMgeo[k,i,3]^2)^.5>maxDistToX) maxDistToX=(CMgeo[k,i,2]^2+CMgeo[k,i,3]^2)^.5
    if ((CMgeo[k,i,1]^2+CMgeo[k,i,3]^2)^.5>maxDistToY) maxDistToY=(CMgeo[k,i,1]^2+CMgeo[k,i,3]^2)^.5
    if ((CMgeo[k,i,1]^2+CMgeo[k,i,2]^2)^.5>maxDistToZ) maxDistToZ=(CMgeo[k,i,1]^2+CMgeo[k,i,2]^2)^.5
# figure out how big the molecule is. We will rotate big molecules less and small ones more.
  }
# print maxDistToX,maxDistToY,maxDistToZ > "tempradius"
#cut rotation angle if molecule is bigger to 2 ang radius
  if (maxDistToX>1.6) angleX=angleX*1.6/maxDistToX
  if (maxDistToY>1.6) angleY=angleY*1.6/maxDistToY
  if (maxDistToZ>1.6) angleZ=angleZ*1.6/maxDistToZ
#now apply the rotation
  for (i=1;i<=molAtoms[k];i++) {
# first x
    tempvar=CMgeo[k,i,2]*cos(angleX)-CMgeo[k,i,3]*sin(angleX)
    CMgeo[k,i,3]=CMgeo[k,i,2]*sin(angleX)+CMgeo[k,i,3]*cos(angleX)
    CMgeo[k,i,2]=tempvar
# then y
    tempvar=CMgeo[k,i,1]*cos(angleY)+CMgeo[k,i,3]*sin(angleY)
    CMgeo[k,i,3]=-CMgeo[k,i,1]*sin(angleY)+CMgeo[k,i,3]*cos(angleY)
    CMgeo[k,i,1]=tempvar
# then z
    tempvar=CMgeo[k,i,1]*cos(angleZ)-CMgeo[k,i,2]*sin(angleZ)
    CMgeo[k,i,2]=CMgeo[k,i,1]*sin(angleZ)+CMgeo[k,i,2]*cos(angleZ)
    CMgeo[k,i,1]=tempvar
#now restore to external coordinates
    newarr[molecule[k,i],1]=CMgeo[k,i,1]+CM[k,1]
    newarr[molecule[k,i],2]=CMgeo[k,i,2]+CM[k,2]
    newarr[molecule[k,i],3]=CMgeo[k,i,3]+CM[k,3]
#print newarr[molecule[k,i],1],newarr[molecule[k,i],2],newarr[molecule[k,i],3]
  }
}

```

```

print "%nproc=" processors
print "%mem=" memory
if (killcheck!=1) print "%chk=" checkpoint
if (nonstandard==0) {
  print "#p " method " scf=(xqc,maxconven=155,fulllinear,nosym) "
  if (meth2=="unrestricted") print "guess=mix" #for unrestricted calculations
  if (meth2=="read") print "guess=tcheck" #for reading orbitals from check, sometimes faster, sometimes not
  print "pop=none "
  if (length(meth3)>2) print meth3
  if (length(meth4)>2) print meth4
}
if (nonstandard==1) {
  print "# "
  print "nonstd"
  system("cat nonstandard")
}
print ""
print title1,title2,title3,title4
print "runpoint ",runpointnum
print ""
if (oniomult==0) print charge,multiplicity
if (oniomult>0) print charge,multiplicity,oniomcharge,oniomult
print numAtoms > "testgeo"
print newPotentialE,title1,title2,title3,title4,"runpoint ",runpointnum >> "testgeo"
for (i=1;i<=numAtoms;i++) {
  printf("%s %.7f %.7f %.7f",atSym[i],newarr[i,1],newarr[i,2],newarr[i,3])
  printf("%s %.7f %.7f %.7f",atSym[i],newarr[i,1],newarr[i,2],newarr[i,3]) >> "testgeo"
  print "" >> "testgeo"
  if ((i>highlevel) && (i<=highlevel+linkatoms)) printf(" %s", "M H")
  if (i>(highlevel+linkatoms)) printf(" %s", "M")
  print ""
}
print ""
if (length(meth5)>2) print meth5
if (length(meth6)>2) print meth6
if (methodfilelines>=1) {
  for (i=1;i<=methodfilelines;i++) {
    getline < "methodfile"
    print $0
  }
}
}

function Distance(Atom1,Atom2) {
  return sqrt((oldarr[Atom1,1]-oldarr[Atom2,1])^2+(oldarr[Atom1,2]-oldarr[Atom2,2])^2+(oldarr[Atom1,3]-oldarr[Atom2,3])^2)
}

function Angle(Atom1,Atom2,Atom3) {
  value=((-
  Distance(Atom1,Atom3)^2+Distance(Atom1,Atom2)^2+Distance(Atom2,Atom3)^2)/(2*Distance(Atom1,Atom2)*Distance(Atom2,Atom3)))
  return acos(value)
}

function asin(x) { return (180/3.141592)*atan2(x, sqrt(1-x*x)) }

function acos(x) { return (180/3.141592)*atan2(sqrt(1-x*x), x) }

function atan(x) { return (180/3.141592)*atan2(x,1) }

function Dihedral(Atom1,Atom2,Atom3,Atom4) {
  B1x=oldarr[Atom2,1]-oldarr[Atom1,1]

```

```

B1y=oldarr[Atom2,2]-oldarr[Atom1,2]
B1z=oldarr[Atom2,3]-oldarr[Atom1,3]
B2x=oldarr[Atom3,1]-oldarr[Atom2,1]
B2y=oldarr[Atom3,2]-oldarr[Atom2,2]
B2z=oldarr[Atom3,3]-oldarr[Atom2,3]
B3x=oldarr[Atom4,1]-oldarr[Atom3,1]
B3y=oldarr[Atom4,2]-oldarr[Atom3,2]
B3z=oldarr[Atom4,3]-oldarr[Atom3,3]
modB2=sqrt((B2x^2)+(B2y^2)+(B2z^2))
# yAx is x-coord. etc of modulus of B2 times B1
yAx=modB2*(B1x)
yAy=modB2*(B1y)
yAz=modB2*(B1z)
# CP2 is the crossproduct of B2 and B3
CP2x=(B2y*B3z)-(B2z*B3y)
CP2y=(B2z*B3x)-(B2x*B3z)
CP2z=(B2x*B3y)-(B2y*B3x)
termY=((yAx*CP2x)+(yAy*CP2y)+(yAz*CP2z))
# CP is the crossproduct of B1 and B2
CPx=(B1y*B2z)-(B1z*B2y)
CPy=(B1z*B2x)-(B1x*B2z)
CPz=(B1x*B2y)-(B1y*B2x)
termX=((CPx*CP2x)+(CPy*CP2y)+(CPz*CP2z))
dihed4=(180/3.141592)*atan2(termY,termX)
return dihed4
}

```

## Program progEcheck

```

BEGIN {
#Dec 21 2015
#This program pulls out the energy from latestmcrun and it pulls the energy from file energy
#and it applies the Monte Carlo test to see if the new point is accepted. If so, it makes a file "goodenergy"

#some default parameters
apforce[1]=0;apatom[1,1]=0;apatom[1,2]=0;
sphereon=0;spheresize=99999;sphereforce=0
zeroatom=0;zeroatomforceK=0.1
potentialcount=0; planeradius=1.4

#initialization
srand(PROCINFO["pid"])
i=1;j=1;k=1
c=29979245800; h=6.626075E-34; avNum=6.0221415E23
RgasK=0.00198588; RgasJ=8.31447; pi=3.14159265359
pi=3.141592
numAtoms=0; atomnumber=0
conver1=4.184E26 #dividing by this converts amu ang^2 /s^2 to kcal/mol
OFS=" "

# read progdyn.conf for configuration info
blankLineTester=10
while (blankLineTester>1) {
  getline < "progmc.conf"
  if ($1=="temperature") temp=$2
  if ($1=="zeroatom") {
    zeroatomon=1
    zeroatom=$2
    zeroatomforceK=$3
  }
  if ($1=="sphereon") sphereon=$2
}

```

```

if ($1=="spheresize") spheresize=$2
if ($1=="sphereforce") sphereforceK=$2
if ($1=="applypotential") {
  potentialcount++
  apforce[potentialcount]=$2; apforceX0[potentialcount]=$3
}
if ($1=="apatoms") {
  potatoms[potentialcount]=NF-1
  for (i=1;i<=potatoms[potentialcount];i++) {
    if ($(i+1)>0) apatom[potentialcount,i]=$ (i+1)
  }
}
if ($1=="applypotentialplane") {
  appotentialplane=$2; appotentialplaneX0=$3; planeradius=$4
}
if ($1=="aplaneatoms") {
  applaneatomnum=NF-1
  if ((appotentialplane>0) && (applaneatomnum<4)) {
    print "you need at least three atoms to define a plane"
    exit
  }
  for (i=1;i<=applaneatomnum;i++) {
    if ($(i+1)>0) applaneatoms[i]=$ (i+1)
  }
}
blankLineTester=length($0)
}

#get the old energy
getline < "energy"
oldenergy=$1
close("energy")

# get runpointnumber
getline < "runpointnumber"
runpointnum = $1

# get number of atoms and geometry from file testgeo
getline < "testgeo"
numAtoms=$1
getline < "testgeo"
for (i=1;i<=numAtoms;i++) {
  getline < "testgeo"
  atSym[i]=$1
  oldarr[i,1]=$2; oldarr[i,2]=$3; oldarr[i,3]=$4
  if (atSym[i]=="H") atWeight[i]=1.00783
  if (atSym[i]=="B") atWeight[i]=10.811
  if (atSym[i]=="C") atWeight[i]=12.
  if (atSym[i]=="N") atWeight[i]=14.007
  if (atSym[i]=="O") atWeight[i]=15.9994
  if (atSym[i]=="F") atWeight[i]=18.9984
  if (atSym[i]=="Cl") atWeight[i]=35.4527
}
}

#pull out the potential energy
/SCF Done/ || /EUMP2 =/ || / Energy=/ || /ONIOM:/ {
  if (($1=="Energy=") && ($3=="NIter=")) newPotentialE=$2
  if ($1=="SCF") newPotentialE=$5
  if ($2=="extrapolated") newPotentialE=$5
  if ($1=="E2") {
    tempstring=$6
  }
}

```

```

    split(tempstring, arr10, "D")
    newPotentialE=arr10[1]*(10^arr10[2])
  }
  newPotEK=(newPotentialE)*627.509
}

END {
#Now we have to add in an energy based on the testgeo and the various biasing potentials
#First, we work with a sphere
if (sphereon==1) {
  biasE=0;totalweight=0
  for (i=1;i<=numAtoms;i++) {
    distToOrig=((oldarr[i,1]^2+oldarr[i,2]^2+oldarr[i,3]^2)^.5)
    if (distToOrig>spheresize) {
      biasE=biasE+0.5*sphereforceK*(distToOrig-spheresize)^2
    }
    if (distToOrig<0.9*spheresize) {
      totalweight=totalweight+atWeight[i]
    }
  }
  density=(totalweight/avNum)/((4/3)*pi*(0.9*spheresize*1E-8)^3)
  print "density",density,"sphere biasing energy",biasE >> "vellist"
  newPotEK=newPotEK+biasE
}

#Now work on zeroatom bias
if (zeroatomon==1) {
  newPotEK=newPotEK+0.5*zeroatomforceK*(oldarr[zeroatom,1]^2+oldarr[zeroatom,2]^2+oldarr[zeroatom,3]^2)
}

#Next, specific biasing potentials between atoms
for (k=1;k<=potentialcount;k++) {
  if ((apforce[k]!=0) && (apatom[k,1]>0) && (apatom[k,2]>0)) {
#first figure out which atom is closest to apatom[1] and put it into apatom[2]
    for (i=3;i<=potatoms[k];i++) {
      if(Distance(apatom[k,1],apatom[k,i])<Distance(apatom[k,1],apatom[k,2])) apatom[k,2]=apatom[k,i]
    }
#now add an energy to the molecule based on the biasing potential
    biasE=0.5*apforce[k]*(Distance(apatom[k,1],apatom[k,2])-apforceX0[k])^2
    newPotEK=newPotEK+biasE
  }
}

#routine for adding a potential based on an atoms distance from a plane defined by other atoms. The plane should have
#a limited radius so we should really consider it as a disk
if (appotentialplane>0) {
#first figure out the center of the plane atoms and move all of the atoms to put that center at the origin
  for (i=2;i<=applaneatomnum;i++) {
    k=applaneatoms[i]
    cmass[1]=cmass[1]+oldarr[k,1];cmass[2]=cmass[2]+oldarr[k,2];cmass[3]=cmass[3]+oldarr[k,3];
  }
  numplaneatoms=applaneatomnum-1
  cmass[1]=cmass[1]/numplaneatoms;cmass[2]=cmass[2]/numplaneatoms;cmass[3]=cmass[3]/numplaneatoms
  for (i=1;i<=applaneatomnum;i++) {
    k=applaneatoms[i]
    newarr[k,1]=oldarr[k,1]-cmass[1];newarr[k,2]=oldarr[k,2]-cmass[2];newarr[k,3]=oldarr[k,3]-cmass[3];
  }
#expect that bugs in process arise when plane is nearly vertical. To avoid this, want to pick the z dimension as the one
#that has the smallest range. since plane is centered, can use sum of absolute values as surrogate for range
  for (i=2;i<=applaneatomnum;i++) {
    k=applaneatoms[i]
    for (m=1;m<=3;m++) {

```

```

        if (newarr[k,m]>0) sum[m]=sum[m]+newarr[k,m];if (newarr[k,m]<0) sum[m]=sum[m]-newarr[k,m]
    }
}
if (sum[1]<sum[3]) {
    for (i=1;i<=aplaneatomnum;i++) {
        k=aplaneatoms[i]
        tempvar=newarr[k,1];newarr[k,1]=newarr[k,3];newarr[k,3]=tempvar
    }
    tempvar=sum[1];sum[1]=sum[3];sum[3]=tempvar
}
if (sum[2]<sum[3]) {
    for (i=1;i<=aplaneatomnum;i++) {
        k=aplaneatoms[i]
        tempvar=newarr[k,2];newarr[k,2]=newarr[k,3];newarr[k,3]=tempvar
    }
    tempvar=sum[2];sum[2]=sum[3];sum[3]=tempvar
}
#now lets find the best plane
for (i=2;i<=aplaneatomnum;i++) {
    k=aplaneatoms[i]
    A[1,1]=A[1,1]+newarr[k,1]^2;A[1,2]=A[1,2]+newarr[k,1]*newarr[k,2];A[1,3]=A[1,3]+newarr[k,1]
    A[2,1]=A[2,1]+newarr[k,1]*newarr[k,2];A[2,2]=A[2,2]+newarr[k,2]^2;A[2,3]=A[2,3]+newarr[k,2]
    A[3,1]=A[3,1]+newarr[k,1];A[3,2]=A[3,2]+newarr[k,2]
    b[1]=b[1]+newarr[k,1]*newarr[k,3];b[2]=b[2]+newarr[k,2]*newarr[k,3];b[3]=b[3]+newarr[k,3]
}
A[3,3]=numplaneatoms
Det=A[1,1]*A[2,2]*A[3,3]+A[1,2]*A[2,3]*A[3,1]+A[1,3]*A[2,1]*A[3,2]-A[1,3]*A[2,2]*A[3,1]-A[1,2]*A[2,1]*A[3,3]-
A[1,1]*A[2,3]*A[3,2]
E=(b[1]*A[2,2]*A[3,3]+A[1,2]*A[2,3]*b[3]+A[1,3]*b[2]*A[3,2]-A[1,3]*A[2,2]*b[3]-A[1,2]*b[2]*A[3,3]-
b[1]*A[2,3]*A[3,2])/Det
F=(A[1,1]*b[2]*A[3,3]+b[1]*A[2,3]*A[3,1]+A[1,3]*A[2,1]*b[3]-A[1,3]*b[2]*A[3,1]-b[1]*A[2,1]*A[3,3]-
A[1,1]*A[2,3]*b[3])/Det
G=(A[1,1]*A[2,2]*b[3]+A[1,2]*b[2]*A[3,1]+b[1]*A[2,1]*A[3,2]-b[1]*A[2,2]*A[3,1]-A[1,2]*A[2,1]*b[3]-
A[1,1]*b[2]*A[3,2])/Det
# E, F, and G are the coefficients in the plane z=Ex+Fy+G - if the zeroing of the plane has worked G = 0
print "E, F, and G are the coefficients in the plane z=Ex+Fy+G",E,F,G >> "diagnostics"
conatom=aplaneatoms[1]
distplane=(-newarr[conatom,1]*E-newarr[conatom,2]*F+newarr[conatom,3]-G)/(E^2+F^2+1)^.5
if (distplane<0) distplane=-distplane
t=(newarr[conatom,1]*E+newarr[conatom,2]*F-newarr[conatom,3]+G)/(E^2+F^2+1)
planepoint[1]=newarr[conatom,1]-t*E;planepoint[2]=newarr[conatom,2]-t*F;planepoint[3]=newarr[conatom,3]+t
distcmass=((planepoint[1])^2+(planepoint[2])^2+(planepoint[3])^2)^.5
print "distplane",distplane,"t",t,"planepoint",planepoint[1],planepoint[2],planepoint[3],"distcmass",distcmass >> "diagnostics"
if (distcmass>planeradius) {
    planepoint[1]=(planeradius/distcmass)*planepoint[1];
    planepoint[2]=(planeradius/distcmass)*planepoint[2];
    planepoint[3]=(planeradius/distcmass)*planepoint[3];
    distcmass=((planepoint[1])^2+(planepoint[2])^2+(planepoint[3])^2)^.5
    distplane=((planepoint[1]-newarr[conatom,1])^2+(planepoint[2]-newarr[conatom,2])^2+(planepoint[3]-
newarr[conatom,3])^2)^.5
    print "new distplane",distplane,"newplanepoint",planepoint[1],planepoint[2],planepoint[3],"newdistcmass",distcmass >>
"diagnostics"
}
}
#finally add an energy to the molecule based on the biasing potential and distance from plane
biasE=0.5*appotentialplane*(distplane-appotentialplaneX0)^2
print "biasE from plane potential",biasE >> "diagnostics"
newPotEK=newPotEK+biasE

}

#now we decide whether or not to accept the new geometry
printon=0

```

```

if (newPotEK<oldenergy) printon=1
Ediff=newPotEK-oldenergy
if (Ediff>10) Ediff=10
if (Ediff<-10) Ediff=-10
AcceptProb=exp(-(Ediff)/(0.001987*temp))
randtest=rand()
if (randtest<AcceptProb) printon=1
printf("%i  %s %.4f %s %.4f %s %.5f %s %.6f      %i",runpointnum,"oldE",oldenergy,"new total
E",newPotEK,"AcceptProb",AcceptProb,"randomNum",randtest,printon) >> "testlist"
print "" >> "testlist"
#print runpointnum,"oldenergy",oldenergy,"new total energy",newPotEK,"AcceptProb",AcceptProb,"randomNum",randtest,"
",printon >> "testlist"
if (printon==1) {
  printf("%.5f",newPotEK) > "goodenergy"
  print "" >> "goodenergy"
}
}

function Distance(Atom1,Atom2) {
  return sqrt((oldarr[Atom1,1]-oldarr[Atom2,1])^2+(oldarr[Atom1,2]-oldarr[Atom2,2])^2+(oldarr[Atom1,3]-oldarr[Atom2,3])^2)
}

```

## Program proganal

```

BEGIN {
  firsttitle=1
  getline < "isomernumber"
  isomer=$1
  # read progdyn.conf for information on the plane potential atoms, if present
  blankLineTester=10
  while (blankLineTester>1) {
    getline < "progmc.conf"
    if ($1=="applypotentialplane") {
      appotentialplane=$2; appotentialplaneX0=$3; planeradius=$4
    }
    if ($1=="aplaneatoms") {
      aplaneatomnum=NF-1
      for (i=1;i<=aplaneatomnum;i++) {
        if ($(i+1)>0) aplaneatoms[i]=$i+1
      }
    }
    blankLineTester=length($0)
  }
}

/NO2/ {
  if (firsttitle==1) {
    printf("%s %s %s %s %s %s %s %s ",$1,$2,$3,$4,$6,$7,$8)
    runpoint=$6
  }
  firsttitle++
}

/Input orientation/./Stoichiometry/ {
  if (($1>.5) && ($1<.99) && ($3=="0")) {
    A[$1]=$4;B[$1]=$5;C[$1]=$6
    i=$1
    oldarr[i,1]=$4; oldarr[i,2]=$5; oldarr[i,3]=$6
  }
}

#/before annihilation/ {

```



```

# printf("%s %.5f " , $1, $6)
# }

END {
  para=Distance(1,16)
  meta=Distance(2,16)
  if (Distance(6,16)<meta) meta=Distance(6,16)
  ortho=Distance(3,16)
  if (Distance(5,16)<ortho) ortho=Distance(5,16)
  ipso=Distance(4,16)
  Opara=Distance(1,17)
  if (Distance(1,18)<Opara) Opara=Distance(1,18)
  Ometa=Distance(2,17)
  if (Distance(2,18)<Ometa) Ometa=Distance(2,18)
  if (Distance(6,17)<Ometa) Ometa=Distance(6,17)
  if (Distance(6,18)<Ometa) Ometa=Distance(6,18)
  Oortho=Distance(3,17)
  if (Distance(3,18)<Oortho) Oortho=Distance(3,18)
  if (Distance(5,17)<Oortho) Oortho=Distance(5,17)
  if (Distance(5,18)<Oortho) Oortho=Distance(5,18)
  Oipso=Distance(4,17)
  if (Distance(4,18)<Oipso) Oipso=Distance(4,18)
  NitF=Distance(16,19)
  if (Distance(16,21)<NitF) NitF=Distance(16,21)
  if (Distance(16,22)<NitF) NitF=Distance(16,22)
  if (Distance(16,23)<NitF) NitF=Distance(16,23)
  NtoPlane=Planedist(16,1,3,5,2,4,6)
  if (appotentialplane>0) NtoPlane=Planedist2()
  BC=Distance(1,20)
  if (Distance(2,20)<BC) BC=Distance(2,20)
  if (Distance(3,20)<BC) BC=Distance(3,20)
  if (Distance(4,20)<BC) BC=Distance(4,20)
  if (Distance(5,20)<BC) BC=Distance(5,20)
  if (Distance(6,20)<BC) BC=Distance(6,20)
  choice=0
  if ((Opara<Ometa) && (Opara<Oortho) && (Opara<NitF)) choice=1
  if ((Ometa<Opara) && (Ometa<Oortho) && (Ometa<NitF)) choice=2
  if ((Oortho<Ometa) && (Oortho<Opara) && (Oortho<NitF)) choice=3
  if (Ometa<2) choice=2
  if (Oortho<2) choice=3
  if (choice==0) printf("%s %.3f %s %.3f %s %.3f %s %.3f %s %.3f %s %.3f %s %.2f
", "p", para, "m", meta, "o", ortho, "i", ipso, "NtoPlane", NtoPlane, "BC", BC)
  if (choice==1) printf("%s %.3f %s %.3f %s %.3f %s %.3f %s %.3f %s %.3f %s %.2f
", "p", para, "m", meta, "o", ortho, "i", ipso, "NtoPlane", NtoPlane, "BC", BC)
  if (choice==2) printf("%s %.3f %s %.3f %s %.3f %s %.3f %s %.3f %s %.3f %s %.2f
", "p", para, "m", meta, "o", ortho, "i", ipso, "NtoPlane", NtoPlane, "BC", BC)
  if (choice==3) printf("%s %.3f %s %.3f %s %.3f %s %.3f %s %.3f %s %.3f %s %.2f
", "p", para, "m", meta, "o", ortho, "i", ipso, "NtoPlane", NtoPlane, "BC", BC)
  if (runpoint>500000) {
    print "Too many points. XXXXN"
  }
#   system("date > nogo")
  }
  if (para<1.6) {
#   print "para product formed XXXX"
#   system("date > nogo")
  }
  if (meta<1.6) {
#   print "meta product formed XXXX"
#   system("date > nogo")
  }
  if (ortho<1.6) {
#   print "ortho product formed XXXX"

```

```

# system("date > nogo")
# }
if (ipso<1.6) {
# print "ipso product formed XXXX"
# system("date > nogo")
# }
if (Opara<1.6) {
# print "Opara product formed XXXX"
# }
if (Ometa<1.6) {
# print "Ometa product formed XXXX"
# }
if (Oortho<1.6) {
# print "Oortho product formed XXXX"
# }
if (Oipso<1.6) {
# print "Oipso product formed XXXX"
# }
# if (NitF<1.6) {
# print "NitF product formed XXXX"
# system("date > nogo")
# }
if ((para>5) && (meta>5) && (ortho>5)) {
# if ((para<5.2) || (para>5.25)) print "Dissociated to SM XXXX"
# }

system("date '+%b:%d:%Y %T'")
# }

function Distance(Atom1,Atom2) {
return sqrt((A[Atom1]-A[Atom2])^2 + (B[Atom1]-B[Atom2])^2 + (C[Atom1]-C[Atom2])^2)
# }

function Angle(Atom1,Atom2,Atom3) {
value=((-
Distance(Atom1,Atom3)^2+Distance(Atom1,Atom2)^2+Distance(Atom2,Atom3)^2)/(2*Distance(Atom1,Atom2)*Distance(Atom2,Atom3)))
return acos(value)
# }

function Planedist2() {
#first figure out the center of the plane atoms and move all of the atoms to put that center at the origin
cmass[1]=0;cmass[2]=0;cmass[3]=0
for (i=2;i<=applaneatomnum;i++) {
k=applaneatoms[i]
cmass[1]=cmass[1]+oldarr[k,1];cmass[2]=cmass[2]+oldarr[k,2];cmass[3]=cmass[3]+oldarr[k,3];
# }
numplaneatoms=applaneatomnum-1
cmass[1]=cmass[1]/numplaneatoms;cmass[2]=cmass[2]/numplaneatoms;cmass[3]=cmass[3]/numplaneatoms
# print "center of masse",cmass[1],cmass[2],cmass[3]
for (i=1;i<=applaneatomnum;i++) {
k=applaneatoms[i]
# print k,oldarr[k,1],oldarr[k,2],oldarr[k,3]
newarr[k,1]=oldarr[k,1]-cmass[1];newarr[k,2]=oldarr[k,2]-cmass[2];newarr[k,3]=oldarr[k,3]-cmass[3];
# print " new",k,newarr[k,1],newarr[k,2],newarr[k,3]
# }
#expect that bugs in process arise when plane is nearly vertical. To avoid this, want to pick the z dimension as the one
#that has the smallest range. since plane is centered, can use sum of absolute values as surrogate for range
for (i=2;i<=applaneatomnum;i++) {
k=applaneatoms[i]
for (m=1;m<=3;m++) {
if (newarr[k,m]>0) sum[m]=sum[m]+newarr[k,m];if (newarr[k,m]<0) sum[m]=sum[m]-newarr[k,m]

```

```

    }
  }
  if (sum[1]<sum[3]) {
    for (i=1;i<=aplaneatomnum;i++) {
      k=aplaneatoms[i]
      tempvar=newarr[k,1];newarr[k,1]=newarr[k,3];newarr[k,3]=tempvar
    }
    tempvar=sum[1];sum[1]=sum[3];sum[3]=tempvar
  }
  if (sum[2]<sum[3]) {
    for (i=1;i<=aplaneatomnum;i++) {
      k=aplaneatoms[i]
      tempvar=newarr[k,2];newarr[k,2]=newarr[k,3];newarr[k,3]=tempvar
    }
    tempvar=sum[2];sum[2]=sum[3];sum[3]=tempvar
  }
}
#now lets find the best plane
A[1,1]=0;A[1,2]=0;A[1,3]=0;A[2,1]=0;A[2,2]=0;A[2,3]=0;A[3,1]=0;A[3,2]=0;A[3,3]=0;b[1]=0;b[2]=0;b[3]=0
for (i=2;i<=aplaneatomnum;i++) {
  k=aplaneatoms[i]
  A[1,1]=A[1,1]+newarr[k,1]^2;A[1,2]=A[1,2]+newarr[k,1]*newarr[k,2];A[1,3]=A[1,3]+newarr[k,1]
  A[2,1]=A[2,1]+newarr[k,1]*newarr[k,2];A[2,2]=A[2,2]+newarr[k,2]^2;A[2,3]=A[2,3]+newarr[k,2]
  A[3,1]=A[3,1]+newarr[k,1];A[3,2]=A[3,2]+newarr[k,2]
  b[1]=b[1]+newarr[k,1]*newarr[k,3];b[2]=b[2]+newarr[k,2]*newarr[k,3];b[3]=b[3]+newarr[k,3]
}
A[3,3]=numplaneatoms
Det=A[1,1]*A[2,2]*A[3,3]+A[1,2]*A[2,3]*A[3,1]+A[1,3]*A[2,1]*A[3,2]-A[1,3]*A[2,2]*A[3,1]-A[1,2]*A[2,1]*A[3,3]-
A[1,1]*A[2,3]*A[3,2]
E=(b[1]*A[2,2]*A[3,3]+A[1,2]*A[2,3]*b[3]+A[1,3]*b[2]*A[3,2]-A[1,3]*A[2,2]*b[3]-A[1,2]*b[2]*A[3,3]-
b[1]*A[2,3]*A[3,2])/Det
F=(A[1,1]*b[2]*A[3,3]+b[1]*A[2,3]*A[3,1]+A[1,3]*A[2,1]*b[3]-A[1,3]*b[2]*A[3,1]-b[1]*A[2,1]*A[3,3]-
A[1,1]*A[2,3]*b[3])/Det
G=(A[1,1]*A[2,2]*b[3]+A[1,2]*b[2]*A[3,1]+b[1]*A[2,1]*A[3,2]-b[1]*A[2,2]*A[3,1]-A[1,2]*A[2,1]*b[3]-
A[1,1]*b[2]*A[3,2])/Det
# E, F, and G are the coefficients in the plane z=Ex+Fy+G - if the zeroing of the plane has worked G = 0
# print "E, F, and G are the coefficients in the plane z=Ex+Fy+G",E,F,G
conatom=aplaneatoms[1]
distplane=(-newarr[conatom,1]*E-newarr[conatom,2]*F+newarr[conatom,3]-G)/(E^2+F^2+1)^.5
if (distplane<0) distplane=-distplane
t=(newarr[conatom,1]*E+newarr[conatom,2]*F-newarr[conatom,3]+G)/(E^2+F^2+1)
planepoint[1]=newarr[conatom,1]-t*E;planepoint[2]=newarr[conatom,2]-t*F;planepoint[3]=newarr[conatom,3]+t
distcmass=((planepoint[1])^2+(planepoint[2])^2+(planepoint[3])^2)^.5
# print "distplane",distplane,"t",t,"planepoint",planepoint[1],planepoint[2],planepoint[3],"distcmass",distcmass
if (distcmass>planeradius) {
  planepoint[1]=(planeradius/distcmass)*planepoint[1];
  planepoint[2]=(planeradius/distcmass)*planepoint[2];
  planepoint[3]=(planeradius/distcmass)*planepoint[3];
  distcmass=((planepoint[1])^2+(planepoint[2])^2+(planepoint[3])^2)^.5
  distplane=((planepoint[1]-newarr[conatom,1])^2+(planepoint[2]-newarr[conatom,2])^2+(planepoint[3]-
newarr[conatom,3])^2)^.5
# print "new distplane",distplane,"newplanepoint",planepoint[1],planepoint[2],planepoint[3],"newdistcmass",distcmass
}
return distplane
}

function Planedist(Atom1,Atom2,Atom3,Atom4,Atom5,Atom6,Atom7) {
afplaneatoms[1]=Atom1;afplaneatoms[2]=Atom2;afplaneatoms[3]=Atom3;afplaneatoms[4]=Atom4;afplaneatoms[5]=Atom5;afp
laneatoms[6]=Atom6;afplaneatoms[7]=Atom7
for (i=2;i<8;i++) {
  if (afplaneatoms[i]>.5) {
    k=afplaneatoms[i]

```

```

A[1,1]=A[1,1]+A[k]^2;A[1,2]=A[1,2]+A[k]*B[k];A[1,3]=A[1,3]+A[k]
A[2,1]=A[2,1]+A[k]*B[k];A[2,2]=A[2,2]+B[k]^2;A[2,3]=A[2,3]+B[k]
A[3,1]=A[3,1]+A[k];A[3,2]=A[3,2]+B[k];A[3,3]++
b[1]=b[1]+A[k]*C[k];b[2]=b[2]+B[k]*C[k];b[3]=b[3]+C[k]
# find center of mass assuming all atoms same weight
  cmass[1]=cmass[1]+A[k];cmass[2]=cmass[2]+B[k];cmass[3]=cmass[3]+C[k];
}
}
cmass[1]=cmass[1]/A[3,3];cmass[2]=cmass[2]/A[3,3];cmass[3]=cmass[3]/A[3,3]
# print "matrix A"
# for (i=1;i<=3;i++) {
#   print A[i,1],A[i,2],A[i,3]
# }
# print "matrix b"
# print b[1],b[2],b[3]

Det=A[1,1]*A[2,2]*A[3,3]+A[1,2]*A[2,3]*A[3,1]+A[1,3]*A[2,1]*A[3,2]-A[1,3]*A[2,2]*A[3,1]-A[1,2]*A[2,1]*A[3,3]-
A[1,1]*A[2,3]*A[3,2]
E=(b[1]*A[2,2]*A[3,3]+A[1,2]*A[2,3]*b[3]+A[1,3]*b[2]*A[3,2]-A[1,3]*A[2,2]*b[3]-A[1,2]*b[2]*A[3,3]-
b[1]*A[2,3]*A[3,2])/Det
F=(A[1,1]*b[2]*A[3,3]+b[1]*A[2,3]*A[3,1]+A[1,3]*A[2,1]*b[3]-A[1,3]*b[2]*A[3,1]-b[1]*A[2,1]*A[3,3]-
A[1,1]*A[2,3]*b[3])/Det
G=(A[1,1]*A[2,2]*b[3]+A[1,2]*b[2]*A[3,1]+b[1]*A[2,1]*A[3,2]-b[1]*A[2,2]*A[3,1]-A[1,2]*A[2,1]*b[3]-
A[1,1]*b[2]*A[3,2])/Det
# E, F, and G are the coefficients in the plane z=Ex+Fy+G"
# make a function that tests the fit
for (i=2;i<8;i++) {
  if (afplaneatoms[i]>.5) {
    k=afplaneatoms[i]
    distplane=(-A[k]*E-B[k]*F+C[k]-G)/(E^2+F^2+1)^.5;if (distplane<0) distplane=-distplane
    aberror=aberror+distplane
  }
}
# if the fit is bad, as can happen, decrease to 3 atoms in plane, using only the first three atoms in list after the conatom
if (aberror>2) {
  print "proganal original aberror",aberror >> "diagnostics"
  A[1,1]=0;A[1,2]=0;A[1,3]=0;A[2,1]=0;A[2,2]=0;A[2,3]=0;A[3,1]=0;A[3,2]=0;A[3,3]=0
  for (i=2;i<5;i++) {
    k=afplaneatoms[i]
    A[1,1]=A[1,1]+A[k]^2;A[1,2]=A[1,2]+A[k]*B[k];A[1,3]=A[1,3]+A[k]
    A[2,1]=A[2,1]+A[k]*B[k];A[2,2]=A[2,2]+B[k]^2;A[2,3]=A[2,3]+B[k]
    A[3,1]=A[3,1]+A[k];A[3,2]=A[3,2]+B[k];A[3,3]++
    b[1]=b[1]+A[k]*C[k];b[2]=b[2]+B[k]*C[k];b[3]=b[3]+C[k]
  }
  Det=A[1,1]*A[2,2]*A[3,3]+A[1,2]*A[2,3]*A[3,1]+A[1,3]*A[2,1]*A[3,2]-A[1,3]*A[2,2]*A[3,1]-A[1,2]*A[2,1]*A[3,3]-
  A[1,1]*A[2,3]*A[3,2]
  E=(b[1]*A[2,2]*A[3,3]+A[1,2]*A[2,3]*b[3]+A[1,3]*b[2]*A[3,2]-A[1,3]*A[2,2]*b[3]-A[1,2]*b[2]*A[3,3]-
  b[1]*A[2,3]*A[3,2])/Det
  F=(A[1,1]*b[2]*A[3,3]+b[1]*A[2,3]*A[3,1]+A[1,3]*A[2,1]*b[3]-A[1,3]*b[2]*A[3,1]-b[1]*A[2,1]*A[3,3]-
  A[1,1]*A[2,3]*b[3])/Det
  G=(A[1,1]*A[2,2]*b[3]+A[1,2]*b[2]*A[3,1]+b[1]*A[2,1]*A[3,2]-b[1]*A[2,2]*A[3,1]-A[1,2]*A[2,1]*b[3]-
  A[1,1]*b[2]*A[3,2])/Det
  aberror=0
  for (i=2;i<5;i++) {
    k=afplaneatoms[i]
    distplane=(-A[k]*E-B[k]*F+C[k]-G)/(E^2+F^2+1)^.5;if (distplane<0) distplane=-distplane
    aberror=aberror+distplane
  }
}
if (aberror>2) {
#   printf("%s %.2f ", "aberror", aberror)
  return 99999999
}

```

```

    }
    conatom=afplaneatoms[1]
    distplane=(-A[conatom]*E-B[conatom]*F+C[conatom]-G)/(E^2+F^2+1)^.5
    if (distplane<0) distplane=-distplane
    t=(A[conatom]*E+B[conatom]*F-C[conatom]+G)/(E^2+F^2+1)
    planepoint[1]=A[conatom]-t*E;planepoint[2]=B[conatom]-t*F;planepoint[3]=C[conatom]+t
    distcmass=((planepoint[1]-cmass[1])^2+(planepoint[2]-cmass[2])^2+(planepoint[3]-cmass[3])^2)^.5
    if (distcmass>1.4) {
        vector[1]=planepoint[1]-cmass[1];vector[2]=planepoint[2]-cmass[2];vector[3]=planepoint[3]-cmass[3]
        vector[1]=vector[1]*1.4/distcmass;vector[2]=vector[2]*1.4/distcmass;vector[3]=vector[3]*1.4/distcmass
        planepoint[1]=cmass[1]+vector[1];planepoint[2]=cmass[2]+vector[2];planepoint[3]=cmass[3]+vector[3];
        distcmass=((planepoint[1]-cmass[1])^2+(planepoint[2]-cmass[2])^2+(planepoint[3]-cmass[3])^2)^.5
        distplane=((planepoint[1]-A[conatom])^2+(planepoint[2]-B[conatom])^2+(planepoint[3]-C[conatom])^2)^.5
    #   print "new distplane",distplane,"newplanepoint",planepoint[1],planepoint[2],planepoint[3],"newdistcmass",distcmass >>
    "diagnostics"
    }

    return distplane
}

function asin(x) { return (180/3.141592)*atan2(x, sqrt(1-x*x)) }

function acos(x) { return (180/3.141592)*atan2(sqrt(1-x*x), x) }

function atan(x) { return (180/3.141592)*atan2(x,1) }

function Dihedral(Atom1,Atom2,Atom3,Atom4) {
    B1x=A[Atom2]-A[Atom1]
    B1y=B[Atom2]-B[Atom1]
    B1z=C[Atom2]-C[Atom1]
    B2x=A[Atom3]-A[Atom2]
    B2y=B[Atom3]-B[Atom2]
    B2z=C[Atom3]-C[Atom2]
    B3x=A[Atom4]-A[Atom3]
    B3y=B[Atom4]-B[Atom3]
    B3z=C[Atom4]-C[Atom3]
    modB2=sqrt((B2x^2)+(B2y^2)+(B2z^2))
    # yAx is x-coord. etc of modulus of B2 times B1
    yAx=modB2*(B1x)
    yAy=modB2*(B1y)
    yAz=modB2*(B1z)
    # CP2 is the crossproduct of B2 and B3
    CP2x=(B2y*B3z)-(B2z*B3y)
    CP2y=(B2z*B3x)-(B2x*B3z)
    CP2z=(B2x*B3y)-(B2y*B3x)
    termY=((yAx*CP2x)+(yAy*CP2y)+(yAz*CP2z))
    # CP is the crossproduct of B1 and B2
    CPx=(B1y*B2z)-(B1z*B2y)
    CPy=(B1z*B2x)-(B1x*B2z)
    CPz=(B1x*B2y)-(B1y*B2x)
    termX=((CPx*CP2x)+(CPy*CP2y)+(CPz*CP2z))
    dihed4=(180/3.141592)*atan2(termY,termX)
    return dihed4
}

function killdyn(isomer) {
    system("rm -f dyn")
}

```

## Program progmc.conf

```

#This is the configuration file for PROGMC. This file is read by progMC and
# the awk programs progmcB and progEcheck
#The programs won't read anything past the first blank line,
#and this file must end with a blank line.
#Do not delete lines - rather, comment out lines for unwanted options.
#The values here are read repeatedly and most can be changed in the middle of running jobs
****The keywords are case sensitive. The following keywords should always be defined:****
****method, charge, multiplicity, memory, processors, title
**** method --The following word is copied exactly to the gaussian input file.
method ONIOM(M062X/6-311G*:PM3)
**** method2 --The options here are restricted, unrestricted, and read. restricted is the default
#If the method is U..., put unrestricted here and the .com files will have in them guess=mix.
#If you put read here, the .com files will contain guess=tcheck, which sometimes makes things faster, sometimes not.
#The use of read requires a specifically defined checkpoint file name using the keyword checkpoint.
method2 read
charge 0
multiplicity 1
oniomchargemult 1 1
processors 3
**** memory --The following "word" is copied exactly to the gaussian input file after %mem=.
memory 7gb
**** killcheck and checkpoint -- You can use a specifically defined checkpoint file name by putting
#the name after the keyword checkpoint. This is necessary if you use the read option with method2.
#Defined checkpoint names are an unnecessary modest hassle and if you do not want to bother, use killcheck 0
killcheck 0
checkpoint g09.chk
**** diagnostics -- 0 prints out nothing extra, 1 (default) prints out extra stuff to a
#file "diagnostics"
diagnostics 0
**** title -- the title keyword must be followed by exactly four words
title NO2+Tol 101CH2Cl2IonP Oniom MonteCarlo
temperature 298.15
#SPECIFIC MONTE CARLO OPTIONS ****
**** mcstepsize sets the maximum distance in each dimension that atoms can be moved for each new point and is applied to all
atoms
mcstepsize 0.0010
lengthstep 0.001
anglestep 0.005
#mcmolrotangle sets the maximum angle in degrees for rotation of molecules about X, Y, Z axes through molecule center of
mass
mcmolrotangle 1.00
# molecule specifications - divides system into molecules and allows a separate stepsize for each molecule. This is in addition to
the step above.
molecule 1 2 3 4 5 6 7 8 9 10 11 12 13 14 15 0.02
molecule 16 17 18 0.02
molecule 19 20 21 22 23 0.02
molecule 24 25 26 27 28 0.02
molecule 29 30 31 32 33 0.02
molecule 34 35 36 37 38 0.02
molecule 39 40 41 42 43 0.02
molecule 44 45 46 47 48 0.02
molecule 49 50 51 52 53 0.02
molecule 54 55 56 57 58 0.02
molecule 59 60 61 62 63 0.02
molecule 64 65 66 67 68 0.02
molecule 69 70 71 72 73 0.02
molecule 74 75 76 77 78 0.02
molecule 79 80 81 82 83 0.02
molecule 84 85 86 87 88 0.02
molecule 89 90 91 92 93 0.02

```

molecule 94 95 96 97 98 0.02  
molecule 99 100 101 102 103 0.02  
molecule 104 105 106 107 108 0.02  
molecule 109 110 111 112 113 0.02  
molecule 114 115 116 117 118 0.02  
molecule 119 120 121 122 123 0.02  
molecule 124 125 126 127 128 0.02  
molecule 129 130 131 132 133 0.02  
molecule 134 135 136 137 138 0.02  
molecule 139 140 141 142 143 0.02  
molecule 144 145 146 147 148 0.02  
molecule 149 150 151 152 153 0.02  
molecule 154 155 156 157 158 0.02  
molecule 159 160 161 162 163 0.02  
molecule 164 165 166 167 168 0.02  
molecule 169 170 171 172 173 0.02  
molecule 174 175 176 177 178 0.02  
molecule 179 180 181 182 183 0.02  
molecule 184 185 186 187 188 0.02  
molecule 189 190 191 192 193 0.02  
molecule 194 195 196 197 198 0.02  
molecule 199 200 201 202 203 0.02  
molecule 204 205 206 207 208 0.02  
molecule 209 210 211 212 213 0.02  
molecule 214 215 216 217 218 0.02  
molecule 219 220 221 222 223 0.02  
molecule 224 225 226 227 228 0.02  
molecule 229 230 231 232 233 0.02  
molecule 234 235 236 237 238 0.02  
molecule 239 240 241 242 243 0.02  
molecule 244 245 246 247 248 0.02  
molecule 249 250 251 252 253 0.02  
molecule 254 255 256 257 258 0.02  
molecule 259 260 261 262 263 0.02  
molecule 264 265 266 267 268 0.02  
molecule 269 270 271 272 273 0.02  
molecule 274 275 276 277 278 0.02  
molecule 279 280 281 282 283 0.02  
molecule 284 285 286 287 288 0.02  
molecule 289 290 291 292 293 0.02  
molecule 294 295 296 297 298 0.02  
molecule 299 300 301 302 303 0.02  
molecule 304 305 306 307 308 0.02  
molecule 309 310 311 312 313 0.02  
molecule 314 315 316 317 318 0.02  
molecule 319 320 321 322 323 0.02  
molecule 324 325 326 327 328 0.02  
molecule 329 330 331 332 333 0.02  
molecule 334 335 336 337 338 0.02  
molecule 339 340 341 342 343 0.02  
molecule 344 345 346 347 348 0.02  
molecule 349 350 351 352 353 0.02  
molecule 354 355 356 357 358 0.02  
molecule 359 360 361 362 363 0.02  
molecule 364 365 366 367 368 0.02  
molecule 369 370 371 372 373 0.02  
molecule 374 375 376 377 378 0.02  
molecule 379 380 381 382 383 0.02  
molecule 384 385 386 387 388 0.02  
molecule 389 390 391 392 393 0.02  
molecule 394 395 396 397 398 0.02  
molecule 399 400 401 402 403 0.02

```

molecule 404 405 406 407 408 0.02
molecule 409 410 411 412 413 0.02
molecule 414 415 416 417 418 0.02
molecule 419 420 421 422 423 0.02
molecule 424 425 426 427 428 0.02
molecule 429 430 431 432 433 0.02
molecule 434 435 436 437 438 0.02
molecule 439 440 441 442 443 0.02
molecule 444 445 446 447 448 0.02
molecule 449 450 451 452 453 0.02
molecule 454 455 456 457 458 0.02
molecule 459 460 461 462 463 0.02
molecule 464 465 466 467 468 0.02
molecule 469 470 471 472 473 0.02
molecule 474 475 476 477 478 0.02
molecule 479 480 481 482 483 0.02
molecule 484 485 486 487 488 0.02
molecule 489 490 491 492 493 0.02
molecule 494 495 496 497 498 0.02
molecule 499 500 501 502 503 0.02
molecule 504 505 506 507 508 0.02
molecule 509 510 511 512 513 0.02
molecule 514 515 516 517 518 0.02
molecule 519 520 521 522 523 0.02
molecule 524 525 526 527 528 0.02
**** method3, method4, method5, and method6 -- These keywords let you add extra lines to the gaussian input file.
#method3 and method4 add lines at the top of the input after the lines defining the method, and
#this is useful to implement things like the iop for mPW1k
#method5 and method6 add lines after the geometry, after a blank line of course
#only a single term with no spaces can be added, one per method line. Here are some examples to uncomment if needed
#method3 IOp(3/76=0572004280)
method3 scf=(conver=5)
#method3 scrf=(pcm,Solvent=dichloromethane)
#add the line below with big structures to get it to put out the distance matrix and the input orientation
method4 iop(2/9=2000)
#method4 iop(3/124=3)
#method4 scrf=(pcm,solvent=dms0,read)
#method5 radii=bondi
#method6
**** methodfile -- This keyword lets you add more complicated endings to gaussian input files
#such as a gen basis set. Put after the keyword the number of lines in a file you create called
#methodfile that contains the test you want to add to the end of the gaussian input
methodfile 0
**** highlevel --For ONIOM jobs, the following line states the number of highlevel atoms,
#which must come before the medium level atoms. Use some high value such as 999 if not using ONIOM
highlevel 18
#applypotential adds energy to bias the MC. Format is applypotential forceConstant(E=.5k(x-x0)^2) x0
#the force constant is in kcal/mol/ang^2
#apatoms choses the atoms with format apatoms firstatom secondatom [additional atoms]
applypotential 118.56 2.35
apatoms 16 1 2 3 4 5 6
#applypotentialplane sets a energy addition to constrain an atom to a distance from a plane defined by other atoms.
#if the number of atoms defining the plane is >3, the plane is a
#least squares best fit keyword applaneatoms is followed first by the atom being set and then by the series of atoms, up to 6, that
define the plane
#first number is forceConstant kcal/mol/ang^2, second is distance in angstroms
#applypotentialplane 100 2.1
#applaneatoms 16 1 3 5 2 4 6
#zeroatom pushes the numbered atom toward the origin with a harmonic potential set by second number in kcal/mol/ang^2
zeroatom 16 1
**** boxon and boxsize - With boxon 1, a cubic box is set such that atoms that reach the edge
#are reflected back toward the middle. Useful for dynamics with solvent molecules. This is a crude

```



```

#implementation that is ok for a few thousand femtoseconds but will not conserve energy long term.
#Set the box size so as to fit the entire initial molecule but not have too much extra room.
#The dimensions of the box are two times the boxsize, e.g. boxsize 7.5 leads to a box that is 15 x 15 x 15 angstroms
#boxon 1
#boxsize 11.2
#*** sphereon and spheresize and sphereforce - uses a force to push atoms within a sphere. notice that if the atom is far outside
of
#the sphere then the force is large unless sphereforce is set small
sphereon 1
spheresize 12.9
sphereforce 11.85

#created Dec 21, 2015

```

## Program whamnitmc

```

cd ~
rm -f ~/regiocount
rm -f n1?*/seriesfile*
awk -v pt=3000 -f ~/progseriesmc n16?/mcfollowfile > n160/seriesfile
awk -v pt=3000 -f ~/progseriesmc n154/mcfollowfile n155/mcfollowfile n156/mcfollowfile n157/mcfollowfile
n158/mcfollowfile n159/mcfollowfile > n154/seriesfile
awk -v pt=4000 -f ~/progseriesmc n112/mcfollowfile n142/mcfollowfile n143/mcfollowfile n144/mcfollowfile
n145/mcfollowfile > n112/seriesfile
awk -f ~/progseriesmc n106/mcfollowfile n107/mcfollowfile n108/mcfollowfile n109/mcfollowfile n110/mcfollowfile
n111/mcfollowfile > n106/seriesfile
awk -f ~/progseriesmc n100/mcfollowfile n101/mcfollowfile n102/mcfollowfile n103/mcfollowfile n104/mcfollowfile
n105/mcfollowfile > n100/seriesfile
awk -f ~/progseriesmc n113/mcfollowfile n114/mcfollowfile > n113/seriesfile
awk -f ~/progseriesmc n115//mcfollowfile n146/mcfollowfile > n115/seriesfile
awk -f ~/progseriesmc n116/mcfollowfile n117/mcfollowfile n118/mcfollowfile > n116/seriesfile
awk -f ~/progseriesmc n119/mcfollowfile n120/mcfollowfile > n119/seriesfile
awk -f ~/progseriesmc n121/mcfollowfile n122/mcfollowfile > n121/seriesfile
awk -f ~/progseriesmc n123/mcfollowfile n124/mcfollowfile > n123/seriesfile
awk -f ~/progseriesmc n125/mcfollowfile n126/mcfollowfile > n125/seriesfile
awk -f ~/progseriesmc n127/mcfollowfile n128/mcfollowfile > n127/seriesfile
awk -f ~/progseriesmc n129/mcfollowfile n147/mcfollowfile > n129/seriesfile
cd ~/wham/wham
./wham 1.475 5.675 84 0.000001 298.15 0 metadatafile.nitrationmc ~/output.nitrationfull 6 23
cd
cat output.nitrationfull
cat ~/regiocount
cat ~/wham/wham/metadatafile.nitrationmc

```

## Program progseriesmc

```

BEGIN {
if (pt<1) startfile=100
if (pt>1) startfile=pt
countpara=0;countmeta=0;countortho=0;countipso=0;counttotal=0
oldfilename=""
switches=-1
current="";oldclosest=""
currentop=""
oldop=""
opswitches=-1
}
/NO2/ {
if (oldfilename!=FILENAME) {

```

```

if (counttotal>0) {
  pp=int(.5+100*countpara/counttotal)
  pm=int(.5+100*countmeta/counttotal)
  po=int(.5+100*countortho/counttotal)
  pi=int(.5+100*countipso/counttotal)
  print oldfilename," ",countpara,countmeta,countortho,countipso," ",counttotal," ",pp,pm,po,pi,"
switches",switches," opswitches",opswitches >> "regiocount"
}
if (counttotal==0) print "" >> "regiocount"
countpara=0;countmeta=0;countortho=0;countipso=0;counttotal=0;switches=-1;current="";oldclosest="";opswitches=-
1;oldop=""
fileline=0
}
oldfilename=FILENAME
fileline++
if (fileline>startfile) {
  counttotal++
  if (($7<$9) && ($7<$11) && ($7<$13)) {
    countpara++
    current="para"
    currentop="para"
  }
  if (($9<$7) && ($9<$11) && ($9<$13)) {
    countmeta++
    current="meta"
  }
  if (($11<$7) && ($11<$9) && ($11<$13)) {
    countortho++
    current="ortho"
    currentop="ortho"
  }
  if (($13<$7) && ($13<$9) && ($13<$11)) {
    countipso++
    current="ipso"
  }
  if (current!=oldclosest) switches++
  if (currentop!=oldop) opswitches++
  oldclosest=current; oldop=currentop
  dist=$7
  if ($9<dist) dist=$9
  if ($11<dist) dist=$11
  if ($13<dist) dist=$13
  printf("%.1f %.3f", $5,dist)
  print ""
}
}
END {
if (counttotal>0) {
  pp=int(.5+100*countpara/counttotal)
  pm=int(.5+100*countmeta/counttotal)
  po=int(.5+100*countortho/counttotal)
  pi=int(.5+100*countipso/counttotal)
}
print oldfilename," ",countpara,countmeta,countortho,countipso," ",counttotal," ",pp,pm,po,pi," switches",switches,"
opswitches",opswitches >> "regiocount"
}
}

```

## Computational Methods Evaluation Studies

For our purposes here, we sought to identify a DFT method that would be practical for trajectories reasonably accurate on the relative and absolute energies for the complexes of  $\text{NO}_2^+$  with toluene, and closely accurate in the area of the energy surface where the selectivity is determined. A problem is that DFT methods tend to overestimate the proton affinity of benzene and to a larger extent overestimate the affinity of aromatics for  $\text{NO}_2^+$ . This overestimation is unlikely to matter to the study of selectivity in the reaction since the energy surface is closely accurate in the critical portion where the selectivity is set, but we sought to minimize the errors.

### **Benzene proton affinity**

Table S4 shows potential energies for benzene versus benzenium ions for various methods and basis sets. All of the energies are based on optimized structures with the exception of the CCSD(T) energies, which use M06-2X/6-311G\* structures in single-point calculations. Considering the G3B3, G4, and CCSD(T) results as standards, it can be seen that most methods with the exception of M06-2X and M11 overestimate the proton affinity.

**Table S4.** Potential energies for benzene versus benzenium ion for various methods / bases sets.

|               | G3B3                 | G4                 | CCSD(T)<br>aug-cc-pvtz | CCSD(T)<br>cc-pvqz |                   | B3LYP<br>6-31G*     |                      |
|---------------|----------------------|--------------------|------------------------|--------------------|-------------------|---------------------|----------------------|
|               |                      | -                  |                        |                    |                   | -                   |                      |
| C6H7+         | -232.446453          | 232.485091         | -232.114897            | -232.165936        |                   | 232.55629<br>4      |                      |
|               |                      | -                  |                        |                    |                   | -                   |                      |
| C6H6<br>Ediff | -232.153910          | 232.192698         | -231.820193            | -231.871714        |                   | 232.24865<br>9      |                      |
| (kcal/mol)    | 183.6                | 183.5              | 184.9                  | 184.6              |                   | 193.0               |                      |
|               | BP86<br>6-31G*       | BPW91<br>6-31G*    | PBE0<br>6-31G*         | M06L<br>6-31G*     | M11<br>6-31G*     | wB97XD<br>6-31G*    | M062X<br>6-31G*      |
|               |                      | -                  |                        |                    |                   | -                   |                      |
| C6H7+         | -232.545356          | 232.522170         | -232.268032            | -232.515650        | -232.382321       | 232.47156<br>1      | -232.431806          |
|               |                      | -                  |                        |                    |                   | -                   |                      |
| C6H6<br>Ediff | -232.238232          | 232.213239         | -231.964089            | -232.208701        | -232.086900       | 232.16432<br>9      | -232.136450          |
| (kcal/mol)    | 192.7                | 193.9              | 190.7                  | 192.6              | 185.4             | 192.8               | 185.3                |
|               | BP86<br>6-311G*      | BPW91<br>6-311G*   | PBE0<br>6-311G*        | M06L<br>6-311G*    | M11<br>6-311G*    | wB97XD<br>6-311G*   | M062X<br>6-311G*     |
|               |                      | -                  |                        |                    |                   | -                   |                      |
| C6H7+         | -232.588069          | 232.563072         | -232.305809            | -232.556019        | -232.425979       | 232.51048<br>0      | -232.478495          |
|               |                      | -                  |                        |                    |                   | -                   |                      |
| C6H6<br>Ediff | -232.287205          | 232.259976         | -232.006696            | -232.254016        | -232.136073       | 232.20867<br>5      | -232.187864          |
| (kcal/mol)    | 188.8                | 190.2              | 187.7                  | 189.5              | 181.9             | 189.4               | 182.4                |
|               | BP86<br>6-311+G**    | BPW91<br>6-311+G** | PBE0<br>6-311+G**      | M06L<br>6-311+G**  | M11<br>6-311+G**  | wB97XD<br>6-311+G** | M062X<br>6-311+G**   |
|               |                      | -                  |                        |                    |                   | -                   |                      |
| C6H7+         | -232.599849          | 232.575118         | -232.318087            | -232.571711        | -232.436198       | 232.52195<br>9      | -232.488282          |
|               |                      | -                  |                        |                    |                   | -                   |                      |
| C6H6<br>Ediff | -232.299970          | 232.272828         | -232.019721            | -232.269721        | -232.146204       | 232.22083<br>4      | -232.198336          |
| (kcal/mol)    | 188.2                | 189.7              | 187.2                  | 189.5              | 182.0             | 189.0               | 181.9                |
|               | revTPSS<br>6-311+G** | VSXC<br>6-311+G**  | B97D<br>6-311+G**      | B3P86<br>6-311+G** | APFD<br>6-311+G** | B98<br>6-311+G**    | LC-wPBE<br>6-311+G** |
| C6H7+         | -232.590042          | -232.716083        | -232.435907            | -233.361656        | -232.403993       | -232.510985         | -232.423149          |
| C6H6<br>Ediff | -232.286856          | -232.411864        | -232.128749            | -233.062288        | -232.103840       | -232.209049         | -232.125794          |
| (kcal/mol)    | 190.3                | 190.9              | 192.7                  | 187.9              | 188.3             | 189.5               | 186.6                |

|                     | BP86             | BPW91            | PBE0             | M06L             | M11              | wB97XD           | M062X            |
|---------------------|------------------|------------------|------------------|------------------|------------------|------------------|------------------|
|                     | 6-311++G(2df,2p) |
| C6H7+               | -232.61386       | -232.58895       | -232.33251       | -232.58540       | -232.45793       | -232.53685       | -232.50405       |
| C6H6                | -232.31418       | -232.28679       | -232.03418       | -232.28290       | -232.16717       | -232.23542       | -232.21451       |
| Ediff<br>(kcal/mol) | 188.1            | 189.6            | 187.2            | 189.8            | 182.5            | 189.1            | 181.7            |

The experimental proton affinity of benzene is  $178.0 \pm 2.2$  kcal/mol (Chong, S. -L.; Franklin, J. L. *J. Am. Chem. Soc.* **1972**, *94*, 6630.) The expected difference between the potential energy and the enthalpy is about 6.4 kcal/mol. This places the computational standards with the experimental error of the experimental value.

### Toluene + NO<sub>2</sub><sup>+</sup>

Table S5 shows potential energies for toluene, NO<sub>2</sub><sup>+</sup>, and adducts of the two in the para, meta, ortho, and ipso positions. In some computational methods such as B3LYP, additional minima are locatable for adducts in the meta and ipso positions in which the C-N distance is 1.9 – 2.2 Å – these minima are usually absent in qualitatively better calculations and they were ignored overall. Only the M06-2X and M11 results are shown here; exploratory studies using other DFT methods suggests the same trend that was seen in the proton affinities of too high of binding energy. The M06-2X/6-311G\* results are themselves still too high in binding energy but the relative energies of of the complexes are very close to those seen in the G3B3 and CCSD(T) results.

**Table S5.** Potential energies for toluene + NO<sub>2</sub><sup>+</sup> .

|         | G3B3               | E vs NO <sub>2</sub> <sup>+</sup><br>+ toluene | relative E | CCSD(T)<br>6-31+G** | E vs NO <sub>2</sub> <sup>+</sup> +<br>toluene | relative E |
|---------|--------------------|------------------------------------------------|------------|---------------------|------------------------------------------------|------------|
| toluene | -271.457270        |                                                |            | -270.797567         |                                                |            |
| NO2+    | -204.644943        |                                                |            | -204.242147         |                                                |            |
| para    | -476.156827        | -34.3                                          | 0.0        | -475.101758         | -38.9                                          | 0.0        |
| meta    | -476.148239        | -28.9                                          | 5.4        | -475.093278         | -33.6                                          | 5.3        |
| ortho   | -476.153003        | -31.9                                          | 2.4        | -475.097989         | -36.6                                          | 2.4        |
| ipso    | -476.148914        | -29.3                                          | 5.0        | -475.095107         | -34.8                                          | 4.2        |
|         |                    |                                                |            |                     | MAD                                            | <b>0.2</b> |
|         | M06-2X<br>6-31+G** | E vs NO <sub>2</sub> <sup>+</sup><br>+ toluene | relative E | M06-2X<br>6-311G*   | E vs NO <sub>2</sub> <sup>+</sup> +<br>toluene | relative E |
| toluene | -271.451006        |                                                |            | -271.492905         |                                                |            |
| NO2+    | -204.627399        |                                                |            | -204.684513         |                                                |            |
| para    | -476.154788        | -47.9                                          | 0.0        | -476.248544         | -44.6                                          | 0.0        |
| meta    | -476.145124        | -41.9                                          | 6.1        | -476.239089         | -38.7                                          | 5.9        |
| ortho   | -476.150080        | -45.0                                          | 3.0        | -476.245375         | -42.6                                          | 2.0        |
| ipso    | -476.145421        | -42.1                                          | 5.9        | -476.240076         | -39.3                                          | 5.3        |
|         |                    |                                                | MAD        |                     | MAD                                            | <b>0.3</b> |

|                              | M06-2X<br>6-311+G** | E vs NO <sub>2</sub> <sup>+</sup><br>+ toluene | relative E | M06-2X<br>6-311G** | E vs NO <sub>2</sub> <sup>+</sup> +<br>toluene | relative E |
|------------------------------|---------------------|------------------------------------------------|------------|--------------------|------------------------------------------------|------------|
| toluene                      | -271.504880         |                                                |            | -271.502483        |                                                |            |
| NO <sub>2</sub> <sup>+</sup> | -204.685003         |                                                |            | -204.682183        |                                                |            |
| para                         | -476.263290         | -46.1                                          | 0.0        | -476.256565        | -45.1                                          | 0.0        |
| meta                         | -476.253410         | -39.9                                          | 6.2        | -476.246814        | -39.0                                          | 6.1        |
| ortho                        | -476.259368         | -43.6                                          | 2.5        | -476.252838        | -42.8                                          | 2.3        |
| ipso                         | -476.253979         | -40.2                                          | 5.8        | -476.247714        | -39.6                                          | 5.6        |
|                              |                     | MAD                                            | <b>0.4</b> |                    | MAD                                            | <b>0.3</b> |

  

|                              | M06-2X<br>6-31G* | E vs NO <sub>2</sub> <sup>+</sup><br>+ toluene | relative E | M11/6-311G*     | E vs NO <sub>2</sub> <sup>+</sup> +<br>toluene | relative E |
|------------------------------|------------------|------------------------------------------------|------------|-----------------|------------------------------------------------|------------|
| toluene                      | -271.433102      |                                                |            | -271.432396     |                                                |            |
| NO <sub>2</sub> <sup>+</sup> | -204.622943      |                                                |            | -204.697027     |                                                |            |
| para                         | -476.133152      | -48.4                                          | 0.0        | -476.198950     | -43.6                                          | 0.0        |
| meta                         | -476.123756      | -42.5                                          | 5.9        | -476.189197     | -37.5                                          | 6.1        |
| ortho                        | -476.129481      | -46.1                                          | 2.3        | -476.195673     | -41.6                                          | 2.1        |
| ipso                         | -476.124093      | -42.7                                          | 5.7        | -476.190691     | -38.4                                          | 5.2        |
|                              | B3LYP/6-31G*     | E vs NO <sub>2</sub> <sup>+</sup><br>+ toluene | relative E | B3LYP/6-311+G** |                                                | relative E |
| toluene                      | -271.5666482     |                                                |            | -2.71E+02       |                                                |            |
| NO <sub>2</sub> <sup>+</sup> | -204.7118274     |                                                |            | -2.04E+02       |                                                |            |
| para                         | -476.354632      | -47.8                                          | 0.0        | -4.75E+02       | -33.6                                          | 0.0        |
| meta                         | -476.3460622     | -42.4                                          | 5.4        | -4.75E+02       | -28.3                                          | 5.3        |
| ortho                        | -476.3506832     | -45.3                                          | 2.5        | -4.75E+02       | -31.4                                          | 2.3        |
| ipso                         | -476.3427837     | -40.4                                          | 7.4        | -4.75E+02       | -29.5                                          | 4.1        |
|                              |                  | MAD                                            | <b>0.6</b> |                 |                                                | <b>0.3</b> |

  

|                              | MP2/6-311G* | Pot E     |       | B3LYP/6-<br>311++G(2d,2p)<br>GD3 |              |           |
|------------------------------|-------------|-----------|-------|----------------------------------|--------------|-----------|
| toluene                      |             | -2.71E+02 |       | -271.6579217                     |              |           |
| NO <sub>2</sub> <sup>+</sup> |             | -2.04E+02 |       | -204.7832824                     |              |           |
| para                         |             | -4.75E+02 | -19.1 | 0.0                              | -476.5140227 | #VALUE!   |
| meta                         |             | -         | -     | -                                | -476.5048891 | -299011.1 |
| ortho                        |             | -4.75E+02 | -17.5 | 1.6                              | -476.5089966 | -299013.7 |
| ipso                         |             | -         | -     | -                                | -476.5030528 | -299010.0 |

### The Energy Surface as NO<sub>2</sub><sup>+</sup> Approaches Toluene

The table below shows potential energies for along a series of geometries as the NO<sub>2</sub><sup>+</sup> approaches the para position of toluene. For these geometries, the C-N distance was fixed at the value shown in the table, the angle to the meta carbon (N-para C-meta C) was set at 90°, and the dihedral angle to the ortho carbon (N-para C-meta C-ortho C) was set at 90°. For the 1.8 Å C-N distance, the angle to the meta carbon was not fixed since the distortion of the ring makes this constraint unnatural versus the normal attack angle.

The graph below the table shows a plot of the M06-2X potential energies versus

CCSD(T) single-point energies. The key result is that the relative energies track very closely in the key region where the C-N distance is between 2.0 and 3.2 Å. (It should be noted that the energy comparison Table S6 and the graph below has set the zero of energy at a C-N distance of 2.0 Å. This arbitrary choice is ok because it is the slope of the energy versus distance, not the absolute energy, that is important in deciding the shape of the energy surface in this area.) From this, we concluded that the M06-2X/6-311G\* energies would be adequate for the study.

**Table S6.** Potential energies as NO<sub>2</sub><sup>+</sup> Approaches Toluene, M06-2X/6-311G\* vs CCSD(T)

| C-N dist. | M062X/6-311G* | rel E | CCSD(T)/6-31+G** | rel E | CCSD(T)/aug-cc-pvdz | rel E |
|-----------|---------------|-------|------------------|-------|---------------------|-------|
| 1.8 Å     | -476.241300   | -2.1  | -475.094510      | -1.5  | -475.186643         | -1.0  |
| 2 Å       | -476.237969   | 0.0   | -475.092113      | 0.0   | -475.185021         | 0.0   |
| 2.4 Å     | -476.228126   | 6.2   | -475.082409      | 6.1   | -475.175199         | 6.2   |
| 2.8 Å     | -476.216525   | 13.5  | -475.068768      | 14.6  | -475.162416         | 14.2  |
| 3.2 Å     | -476.207179   | 19.3  | -475.062964      | 18.3  | -475.156380         | 18.0  |
| 3.6 Å     | -476.203234   | 21.8  | -475.060262      | 20.0  | -475.152208         | 20.6  |
| 4 Å       | -476.197929   | 25.1  | -475.056327      | 22.5  | -475.148288         | 23.1  |
| 5 Å       | -476.187026   | 32.0  | -475.046326      | 28.7  | -475.138043         | 29.5  |
| 6 Å       | -476.182830   | 34.6  | -475.041421      | 31.8  | -475.133430         | 32.4  |
| NO2+      | -204.684513   |       | -204.237150      |       | -204.302711         |       |
| toluene   | -271.492905   | 38.0  | -270.797002      | 36.4  | -270.823600         | 36.8  |

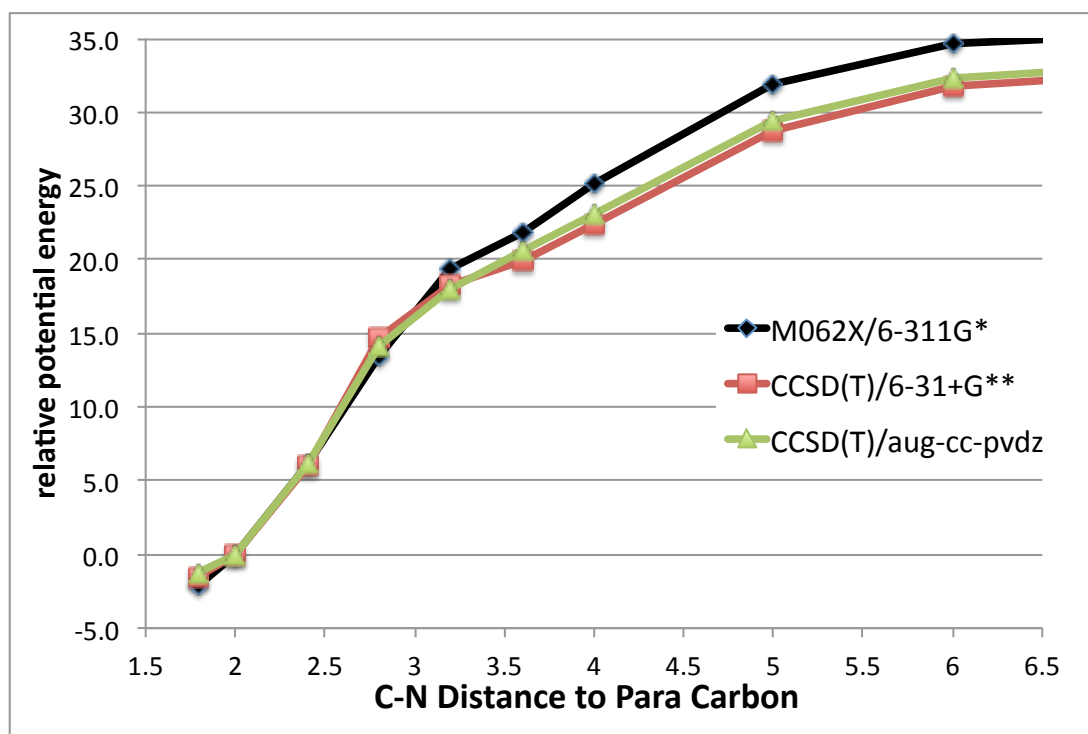

### The NO<sub>2</sub><sup>+</sup> - BF<sub>4</sub><sup>-</sup> Interaction

Exploratory computational studies on NO<sub>2</sub><sup>+</sup>BF<sub>4</sub><sup>-</sup> encountered decomposition to afford

$\text{NO}_2\text{F} + \text{BF}_3$ . Since this is counter to the experimental observation that  $\text{NO}_2^+\text{BF}_4^-$  is obtained from  $\text{NO}_2\text{F} + \text{BF}_3$ , this reaction was examined carefully.

A series of structures along an approximate  $\text{NO}_2^+\text{BF}_4^-$  to  $\text{NO}_2\text{F} / \text{BF}_3$  gas phase pathway were obtained by optimizing each (as complexes) and optimizing structures with a B-F interatomic distance constrained at 1.5, 1.6, 1.7, 1.8, 1.9, 2.0, 2.2, 2.4, and 2.6 Å, in M062X/6-31+G\*\* calculations. The structures obtained are listed below. The following Table S6 shows the calculated energies of these structures at a series of computational levels.

It may be noted from Table S6 that M06-2X calculations generally underestimate the stability of  $\text{NO}_2^+\text{BF}_4^-$  versus  $\text{NO}_2\text{F} / \text{BF}_3$ , relative to CCSD(T) calculations. The highest level CCSD(T) calculations place the barrier for decomposition of  $\text{NO}_2^+\text{BF}_4^-$  in the gas phase at 3.3 kcal/mol, compared to only 0.2 kcal/mol in M06-2X/6-311G\*. Larger basis sets come closer with M06-2X, but they underestimate the barrier and place the  $\text{NO}_2\text{F} / \text{BF}_3$  at 3 kcal/mol too stable versus the CCSD(T) results. PM3 calculations in contrast greatly overestimate the stability of the  $\text{NO}_2^+\text{BF}_4^-$ .

In solution, the ionic structure is stabilized. CCSD(T)/jun-cc-pvtz calculations including a PCM estimate place the  $\text{NO}_2^+\text{BF}_4^-$  as more stable than the  $\text{NO}_2\text{F} / \text{BF}_3$  by 14 kcal/mol, as fits with the experimental observation. On this basis it was judged that the overstabilization of  $\text{NO}_2^+\text{BF}_4^-$  by the PM3 calculations was acceptable. It should be noted that we have made this comparison with PM3 instead of the ONIOM(M06-2X/6-311G\*:PM3) used for the actual modeling because the ONIOM calculation fails as the atom transfer occurs. The PM3 part of the ONIOM calculation is the part that dominates the  $\text{NO}_2^+\text{BF}_4^-$  interaction since it is part that contains both ions. See below for a direct measurement of the ONIOM energies outside of the context of the F transfer.

|                                                                                                                                                                                                                                                                                                                                                                                                                                                                                                                                                                                                                                                                                                                                                                                                                                                                                                                                                                                                                                                                                                                                                                                                                     |                                                                                                                                                                                                                                                                                                                                                                                                                                                                                                                                                                                                                                                                                                                                                                                                                                                                                                                                                                                                                                                                       |
|---------------------------------------------------------------------------------------------------------------------------------------------------------------------------------------------------------------------------------------------------------------------------------------------------------------------------------------------------------------------------------------------------------------------------------------------------------------------------------------------------------------------------------------------------------------------------------------------------------------------------------------------------------------------------------------------------------------------------------------------------------------------------------------------------------------------------------------------------------------------------------------------------------------------------------------------------------------------------------------------------------------------------------------------------------------------------------------------------------------------------------------------------------------------------------------------------------------------|-----------------------------------------------------------------------------------------------------------------------------------------------------------------------------------------------------------------------------------------------------------------------------------------------------------------------------------------------------------------------------------------------------------------------------------------------------------------------------------------------------------------------------------------------------------------------------------------------------------------------------------------------------------------------------------------------------------------------------------------------------------------------------------------------------------------------------------------------------------------------------------------------------------------------------------------------------------------------------------------------------------------------------------------------------------------------|
| <p><math>\text{NO}_2^+\text{BF}_4^-</math> optimized</p> <p>N,0,-0.022319944,-0.0029035981,0.6020011006<br/> O,0,0.8959765174,0.6378858721,0.5940170116<br/> O,0,-1.0408605484,-0.4640447783,0.5224527331<br/> F,0,0.5700340065,-1.1977733821,2.3900375434<br/> B,0,1.5944950494,-1.9175546725,1.6551417477<br/> F,0,1.0645114001,-1.9305547694,0.3039510007<br/> F,0,1.7577203971,-3.1750387776,2.13569363<br/> F,0,2.732149122,-1.1325228942,1.6491662329</p> <p>B---F 1.5</p> <p>N,0,-0.017444,-0.01891,0.636823<br/> O,0,0.890343,0.638022,0.60259<br/> O,0,-1.030554,-0.489376,0.531911<br/> F,0,0.584343,-1.179712,2.345214<br/> B,0,1.640719,-1.944471,1.604126<br/> F,0,1.114298,-1.954237,0.267388<br/> F,0,1.762859,-3.188862,2.119797<br/> F,0,2.776162,-1.167321,1.62604</p> <p>B---F 1.6</p> <p>N,0,-0.0051631862,-0.0920951565,0.8159755109<br/> O,0,0.8091398438,0.6831751727,0.6177411295<br/> O,0,-1.0427317163,-0.516653794,0.5981578317<br/> F,0,0.6148274245,-1.0947475218,2.1160202206<br/> B,0,1.7559979801,-2.0164048625,1.4770549797<br/> F,0,1.3117874952,-2.0694552011,0.1664084691<br/> F,0,1.6715159015,-3.1676866073,2.1673553267<br/> F,0,2.8835672573,-1.2804990295,1.6325405319</p> | <p>B---F 2.0</p> <p>N,0,0.061651,-0.206496,0.909102<br/> O,0,0.822225,0.610563,0.57027<br/> O,0,-1.028229,-0.549447,0.675384<br/> F,0,0.668367,-1.082456,1.983521<br/> B,0,2.093159,-2.284777,1.259371<br/> F,0,1.580426,-2.245116,0.026896<br/> F,0,1.801043,-3.302036,2.049766<br/> F,0,3.113167,-1.4926,1.546398</p> <p>B---F 2.2</p> <p>N,0,0.08738,-0.245572,0.908685<br/> O,0,0.865704,0.53582,0.514434<br/> O,0,-1.024824,-0.542556,0.694299<br/> F,0,0.668208,-1.087182,1.975806<br/> B,0,2.241359,-2.404697,1.182488<br/> F,0,1.689249,-2.311617,-0.02134<br/> F,0,1.91113,-3.400761,1.977986<br/> F,0,3.230039,-1.594801,1.503076</p> <p>B---F 2.4</p> <p>N,0,0.1191221211,-0.2813409529,0.9030886757<br/> O,0,0.8997504999,0.4937531268,0.49397702<br/> O,0,-0.9882456338,-0.5880304693,0.6654499697<br/> F,0,0.6720261052,-1.0712198189,2.0009059884<br/> B,0,2.3694818934,-2.5152969054,1.1102394798<br/> F,0,1.7517688,-2.3489242473,-0.0497008719<br/> F,0,2.0320536432,-3.5162956538,1.8933153544<br/> F,0,3.368719571,-1.7230100793,1.4328853839</p> |
|---------------------------------------------------------------------------------------------------------------------------------------------------------------------------------------------------------------------------------------------------------------------------------------------------------------------------------------------------------------------------------------------------------------------------------------------------------------------------------------------------------------------------------------------------------------------------------------------------------------------------------------------------------------------------------------------------------------------------------------------------------------------------------------------------------------------------------------------------------------------------------------------------------------------------------------------------------------------------------------------------------------------------------------------------------------------------------------------------------------------------------------------------------------------------------------------------------------------|-----------------------------------------------------------------------------------------------------------------------------------------------------------------------------------------------------------------------------------------------------------------------------------------------------------------------------------------------------------------------------------------------------------------------------------------------------------------------------------------------------------------------------------------------------------------------------------------------------------------------------------------------------------------------------------------------------------------------------------------------------------------------------------------------------------------------------------------------------------------------------------------------------------------------------------------------------------------------------------------------------------------------------------------------------------------------|



|                                                                                                                                                                                                                                                                                                                                                                                                                                                                                                                                                                                                                                                                                                                                                                                                                                                                                                                                                                                                                                                                    |                                                                                                                                                                                                                                                                                                                                                                                                                                                                                                                                                                                                                                                                                                                                                                                    |
|--------------------------------------------------------------------------------------------------------------------------------------------------------------------------------------------------------------------------------------------------------------------------------------------------------------------------------------------------------------------------------------------------------------------------------------------------------------------------------------------------------------------------------------------------------------------------------------------------------------------------------------------------------------------------------------------------------------------------------------------------------------------------------------------------------------------------------------------------------------------------------------------------------------------------------------------------------------------------------------------------------------------------------------------------------------------|------------------------------------------------------------------------------------------------------------------------------------------------------------------------------------------------------------------------------------------------------------------------------------------------------------------------------------------------------------------------------------------------------------------------------------------------------------------------------------------------------------------------------------------------------------------------------------------------------------------------------------------------------------------------------------------------------------------------------------------------------------------------------------|
| <p>B---F 1.7<br/> N,0,0.0120379944,-0.1303437117,0.8551360326<br/> O,0,0.7978244436,0.6715642226,0.6050831369<br/> O,0,-1.0405457893,-0.5339990736,0.6259678996<br/> F,0,0.6366218478,-1.0788826779,2.0625820976<br/> B,0,1.8455862705,-2.0825002843,1.4136181325<br/> F,0,1.3971885629,-2.1153036438,0.12334003<br/> F,0,1.6802099981,-3.1919148854,2.142284238<br/> F,0,2.9482326721,-1.3424859457,1.6206054328</p> <p>B---F 1.8<br/> N,0,0.02454,-0.163116,0.878316<br/> O,0,0.772261,0.663628,0.568513<br/> O,0,-1.036309,-0.572667,0.665475<br/> F,0,0.68131,-1.044964,2.030338<br/> B,0,1.933703,-2.149608,1.35857<br/> F,0,1.477161,-2.131897,0.085025<br/> F,0,1.675263,-3.224053,2.100573<br/> F,0,3.027448,-1.43069,1.61917</p> <p>B---F 1.9<br/> N,0,0.050719,-0.186403,0.896569<br/> O,0,0.826207,0.623231,0.589223<br/> O,0,-1.031482,-0.532953,0.652855<br/> F,0,0.645878,-1.091422,1.998952<br/> B,0,2.011546,-2.217028,1.307605<br/> F,0,1.515919,-2.219268,0.059813<br/> F,0,1.769088,-3.254951,2.094826<br/> F,0,3.045718,-1.424071,1.563501</p> | <p>B---F 2.6<br/> N,0,0.123677,-0.346353,0.855384<br/> O,0,0.777015,0.54421,0.454345<br/> O,0,-0.888309,-0.861403,0.554706<br/> F,0,0.719678,-0.968173,2.024171<br/> B,0,2.508952,-2.600422,1.078514<br/> F,0,1.839943,-2.321167,-0.028958<br/> F,0,2.157547,-3.633982,1.810118<br/> F,0,3.54261,-1.862075,1.416609</p> <p>NO<sub>2</sub>F / BF<sub>3</sub> optimized<br/> N,0,0.1472631518,-0.3686395546,0.8592591372<br/> O,0,0.7710290149,0.5394206139,0.4535398093<br/> O,0,-0.8694484471,-0.8925379889,0.5960145524<br/> F,0,0.8085900878,-1.0131920582,1.9886974492<br/> B,0,2.4732315258,-2.5703641874,1.0789656983<br/> F,0,1.8677680127,-2.3223345198,-0.0724994903<br/> F,0,2.0837769337,-3.5877475263,1.8148803041<br/> F,0,3.4989027204,-1.8339697788,1.4460315397</p> |
|--------------------------------------------------------------------------------------------------------------------------------------------------------------------------------------------------------------------------------------------------------------------------------------------------------------------------------------------------------------------------------------------------------------------------------------------------------------------------------------------------------------------------------------------------------------------------------------------------------------------------------------------------------------------------------------------------------------------------------------------------------------------------------------------------------------------------------------------------------------------------------------------------------------------------------------------------------------------------------------------------------------------------------------------------------------------|------------------------------------------------------------------------------------------------------------------------------------------------------------------------------------------------------------------------------------------------------------------------------------------------------------------------------------------------------------------------------------------------------------------------------------------------------------------------------------------------------------------------------------------------------------------------------------------------------------------------------------------------------------------------------------------------------------------------------------------------------------------------------------|

**Table S6.** Relative energies for structures in the decomposition of NO<sub>2</sub><sup>+</sup> BF<sub>4</sub><sup>-</sup>

|                                                           | CCSD(T)     |      | CCSD(T)      |      | CCSD(T)      |      |
|-----------------------------------------------------------|-------------|------|--------------|------|--------------|------|
|                                                           | aug-cc-pvdz | Erel | cc-pvtz      | Erel | jun-cc-pvtz  | Erel |
| NO <sub>2</sub> <sup>+</sup> BF <sub>4</sub> <sup>-</sup> | -628.21720  | 0.0  | -628.69569   | 0.0  | -628.72372   | 0.0  |
| 1.5                                                       | -628.21690  | 0.2  | -628.69481   | 0.6  | -628.72280   | 0.6  |
| 1.6                                                       | -628.21179  | 3.4  | -628.69241   | 2.1  | -628.71845   | 3.3  |
| 1.7                                                       | -628.21148  | 3.6  | -628.69300   | 1.7  | -628.71851   | 3.3  |
| 1.8                                                       | -628.21182  | 3.4  | -628.69415   | 1.0  | -628.71939   | 2.7  |
| 1.9                                                       | -628.21266  | 2.9  | -628.69558   | 0.1  | -628.72076   | 1.9  |
| 2                                                         | -628.21371  | 2.2  | -628.69724   | -1.0 | -628.72241   | 0.8  |
| 2.2                                                       | -628.21571  | 0.9  | -628.69999   | -2.7 | -628.72525   | -1.0 |
| 2.4                                                       | -628.21656  | 0.4  | -628.70140   | -3.6 | -628.72673   | -1.9 |
| 2.6                                                       | -628.21634  | 0.5  | -628.70165   | -3.7 | -628.72705   | -2.1 |
| NO <sub>2</sub> F BF <sub>3</sub>                         | -628.21666  | 0.3  | -628.70164   | -3.7 | -628.72698   | -2.1 |
|                                                           | M06-2X      |      | M06-2X       |      | M06-2X       |      |
|                                                           | 6-31+G**    | Erel | 6-311G*      | Erel | aug-cc-pvtz  | Erel |
| NO <sub>2</sub> <sup>+</sup> BF <sub>4</sub> <sup>-</sup> | -629.23780  | 0.0  | -629.3995962 | 0.0  | -629.4981163 | 0.0  |
| 1.5                                                       | -629.23723  | 0.4  | -629.3993008 | 0.2  | -629.4972818 | 0.5  |
| 1.6                                                       | -629.23710  | 0.4  | -629.39987   | -0.2 | -629.4951584 | 1.9  |
| 1.7                                                       | -629.23834  | -0.3 | -629.4012319 | -1.0 | -629.4956709 | 1.5  |
| 1.8                                                       | -629.23990  | -1.3 | -629.4030977 | -2.2 | -629.4969063 | 0.8  |
| 1.9                                                       | -629.24194  | -2.6 | -629.4053221 | -3.6 | -629.4987515 | -0.4 |

|                                     |              |      |              |      |              |      |
|-------------------------------------|--------------|------|--------------|------|--------------|------|
| 2                                   | -629.24426   | -4.1 | -629.4077262 | -5.1 | -629.5009719 | -1.8 |
| 2.2                                 | -629.24786   | -6.3 | -629.4110628 | -7.2 | -629.5045536 | -4.0 |
| 2.4                                 | -629.24923   | -7.2 | -629.4120594 | -7.8 | -629.5061669 | -5.1 |
| 2.6                                 | -629.24909   | -7.1 | -629.4115213 | -7.5 | -629.5061913 | -5.1 |
| NO <sub>2</sub> F BF <sub>3</sub>   | -629.24930   | -7.2 | -629.4120478 | -7.8 | -629.5062855 | -5.1 |
| M06-2X/PCM                          |              |      |              |      |              |      |
|                                     | 6-31+G**     | Erel | PM3          | Erel |              |      |
| NO <sub>2</sub> + BF <sub>4</sub> - | -629.427384  | 0.0  | -0.469309867 | 0.0  |              |      |
| 1.5                                 | -629.4255249 | 1.2  | -0.467750082 | 1.0  |              |      |
| 1.6                                 | -629.4133525 | 8.8  | -0.464537377 | 3.0  |              |      |
| 1.7                                 | -629.4103337 | 10.7 | -0.456245746 | 8.2  |              |      |
| 1.8                                 | -629.4094253 | 11.3 | -0.451351991 | 11.3 |              |      |
| 1.9                                 | -629.4099826 | 10.9 | -0.449115832 | 12.7 |              |      |
| 2                                   | -629.4114811 | 10.0 | -0.448821348 | 12.9 |              |      |
| 2.2                                 | -629.4141471 | 8.3  | -0.449866933 | 12.2 |              |      |
| 2.4                                 | -629.4148851 | 7.8  | -0.450117622 | 12.0 |              |      |
| 2.6                                 | -629.4141815 | 8.3  | -0.448763219 | 12.9 |              |      |
| NO <sub>2</sub> F BF <sub>3</sub>   | -629.4147793 | 7.9  | -0.449721036 | 12.3 |              |      |

A second issue with regard to the NO<sub>2</sub><sup>+</sup>BF<sub>4</sub><sup>-</sup> is the general energetic attraction of the two ions. To explore this issue, we obtained a series of structures optimized in the ONIOM calculations in which the B and N atoms were set at fixed distances  $x$  with  $x$  being 2.7, 2.8, 2.9, 3.0, 3.1, 3.2, 3.3, 3.4, 3.5, 3.6, 3.8, 4.0, 4.5, 5, 6, 8, 10, 12, 15, and 20 Å, then calculated CCSD(T)/jun-cc-pvtz single point energies for these structures. This process was complicated by the observation that the NO<sub>2</sub><sup>+</sup> may approach the BF<sub>4</sub><sup>-</sup> in two ways, one that is symmetrical with respect to a pair of BF bonds and one in which the N approaches a single F; in each case we chose the lowest energy of the two possibilities. The absolute and relative energies obtained are shown in Table S7. The graphs below shows plots of the energies in the relevant area of the energy surface (left) and the overall surface out to 20 Å (right). Energies at shorter distances could not be obtained from the ONIOM calculation. The CCSD(T) calculation failed for the 3.0 Å structure for unknown reasons.

The ONIOM calculations underestimate the gas-phase attraction of the ions by 17 kcal/mole. The curves at long distances are identical because the energy is dominated by simple electrostatic interaction. At short distances, however, there is a degree of electron transfer between the ions that is underestimated in the underlying PM3 calculations of the ONIOM. The effect of the error in the ONIOM calculations is that the BF<sub>4</sub><sup>-</sup> ion will tend to adopt a longer distance from the NO<sub>2</sub><sup>+</sup> than it would in reality. In this way, the BF<sub>4</sub><sup>-</sup> should act like a larger anion. Experimentally, the choice of counterion has very little effect on the selectivity experimentally (see Table 8 in ref 14). In toluene solvent, NO<sub>2</sub>BF<sub>4</sub>, NO<sub>2</sub>PF<sub>6</sub>, NO<sub>2</sub>ClO<sub>4</sub>, NO<sub>2</sub>Cl/TiCl<sub>4</sub>, NO<sub>2</sub>Cl/SnCl<sub>4</sub>, NO<sub>2</sub>Cl/BF<sub>3</sub>, and NO<sub>2</sub>Cl/PF<sub>5</sub> all provide product ratios that are within experimental error of each other. For this reason, it was viewed that the tightness of counterion to the NO<sub>2</sub><sup>+</sup> is not a major factor in the reaction's selectivity, so the error in the ONIOM surface was considered acceptable.

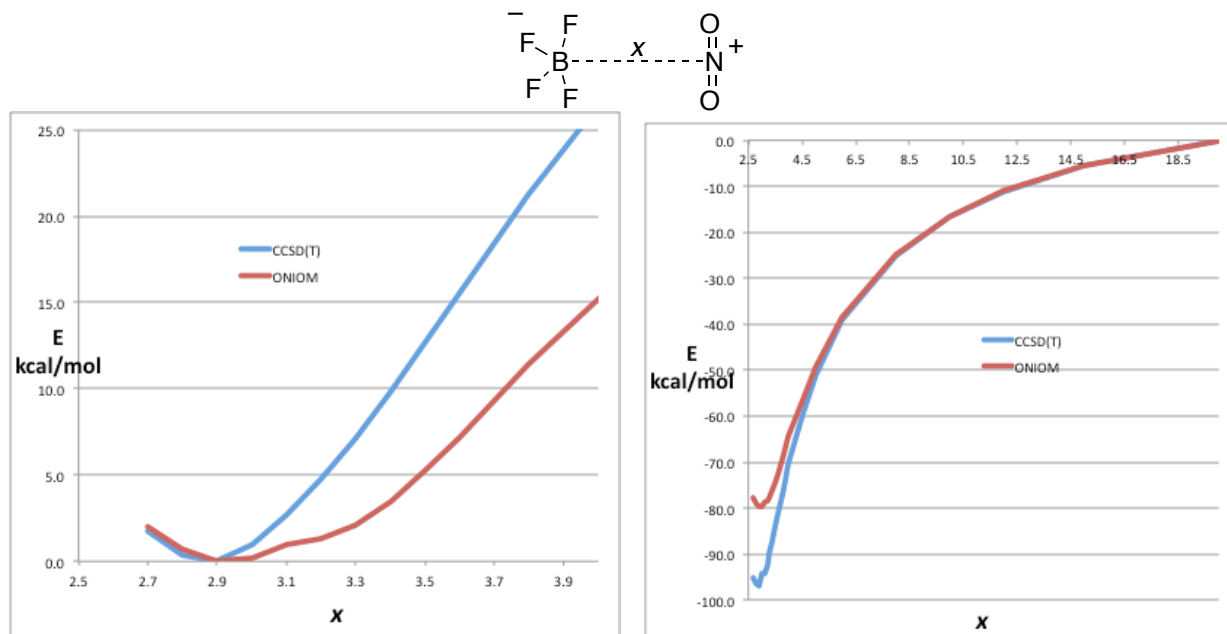

Table S7.

|     | CCSD(T)     | Erel | ONIOM       | Erel |
|-----|-------------|------|-------------|------|
|     | jun-cc-pvtz |      |             |      |
| 2.7 | -628.716699 | 1.8  | -205.490359 | 2.0  |
| 2.8 | -628.718872 | 0.4  | -205.492503 | 0.7  |
| 2.9 | -628.719513 | 0.0  | -205.493599 | 0.0  |
| 3   |             |      | -205.493268 | 0.2  |
| 3.1 | -628.715203 | 2.7  | -205.492045 | 1.0  |
| 3.2 | -628.711965 | 4.7  | -205.491569 | 1.3  |
| 3.3 | -628.708135 | 7.1  | -205.490231 | 2.1  |
| 3.4 | -628.703843 | 9.8  | -205.488038 | 3.5  |
| 3.5 | -628.699288 | 12.7 | -205.485174 | 5.3  |
| 3.6 | -628.694660 | 15.6 | -205.482086 | 7.2  |
| 3.8 | -628.685665 | 21.2 | -205.475378 | 11.4 |
| 4   | -628.677344 | 26.5 | -205.469391 | 15.2 |
| 4.5 | -628.659918 | 37.4 | -205.456273 | 23.4 |
| 5   | -628.646589 | 45.8 | -205.445056 | 30.5 |
| 6   | -628.627561 | 57.7 | -205.427762 | 41.3 |
| 8   | -628.604911 | 71.9 | -205.405945 | 55.0 |
| 10  | -628.591549 | 80.3 | -205.392807 | 63.2 |
| 12  | -628.582692 | 85.9 | -205.384032 | 68.8 |
| 15  | -628.573856 | 91.4 | -205.375245 | 74.3 |
| 20  | -628.565032 | 96.9 | -205.366448 | 79.8 |

## Calculated Structures and Complete Energies

### Guide to Structures, Structure Titles and Their Organization

The sections below are divided into systems (e.g. toluene + NO<sub>2</sub><sup>+</sup>, toluene + NO<sub>2</sub><sup>+</sup>BF<sub>4</sub><sup>-</sup>, toluene + NO<sub>2</sub><sup>+</sup> + H<sub>2</sub>SO<sub>4</sub>) then subdivided by type of structure (e.g. transition structures, pi complexes, product). Individual structures are then given a specific descriptive title. When dealing with large classes of structures, the structures are given a code number that makes them uniquely identifiable. The code is associated with a number in the original calculation file, so that this file can always be located even if the file title changes.

The structure titles contain some short descriptive words. Here is what those words mean in a longer format:

PCM – means that a PCM implicit model was employed. With no other description, this would be for CH<sub>2</sub>Cl<sub>2</sub> using default procedures in Gaussian 09.

ONIOM – means a 2-layer ONIOM calculation with M06-2X/6-311G\* used for the toluene and NO<sub>2</sub><sup>+</sup> and PM3 used for all other atoms.

para, meta, ortho, and ipso – refers to the closest aromatic carbon to the NO<sub>2</sub><sup>+</sup>, with no other implication.

O-Pi or N-Pi – The O-Pi complexes have the an oxygen of NO<sub>2</sub><sup>+</sup> near the center of the ring, while the N-Pi complexes have the N of NO<sub>2</sub><sup>+</sup> closest to the arene carbons. Some pictures of structures are included to make the distinction clear. The N-Pi complexes tend to be lower in energy.

In cases some of the located structures are very similar to each other, often differing by only by the rotation of the methyl group of the toluene. When two nearly identical structures were located and recognized as such, only the lower energy of the two structures is presented.

#### Toluene M062X/6-311G\*/PCM(CH<sub>2</sub>Cl<sub>2</sub>)

M062X/6-311G\*

E(RM062X) = -271.495957959

Zero-point correction= 0.128768 (Hartree/Particle)

Thermal correction to Energy= 0.134919

Thermal correction to Enthalpy= 0.135863

Thermal correction to Gibbs Free Energy= 0.098498

Sum of electronic and ZPE= -271.367190

Sum of electronic and thermal Energies= -271.361039

Sum of electronic and thermal Enthalpies= -271.360095

Sum of electronic and thermal Free Energies= -271.397460

| E            | CV        | S         |
|--------------|-----------|-----------|
| KCal/Mol     | Cal/Mol-K | Cal/Mol-K |
| Total 84.663 | 23.067    | 78.640    |

C,0,0.9255051816,1.9370543762,0.0057654806  
 C,0,1.0098007575,1.2375724004,1.2064981383  
 C,0,1.1869602,-0.1419972957,1.199941624  
 C,0,1.284754455,-0.8481474363,-0.0010834637  
 C,0,1.1963030969,-0.1355138276,-1.1978033889  
 C,0,1.0190097515,1.2451366148,-1.1975078481  
 C,0,1.5061423469,-2.3389391059,-0.0002698899  
 H,0,0.7844816855,3.0119095013,0.0085174978  
 H,0,0.9338148302,1.767208922,2.1498296396

H,0,1.2484042735,-0.6817083439,2.1403208093  
 H,0,1.2648270094,-0.6689711516,-2.1410921768  
 H,0,0.9503454097,1.7799882021,-2.1384493338  
 H,0,1.1685149351,-2.7912053875,-0.933916141  
 H,0,0.9746972721,-2.8180741361,0.8238800437  
 H,0,2.5680077949,-2.5733583322,0.115225009

#### NO<sub>2</sub><sup>+</sup> M062X/6-311G\*/PCM(CH<sub>2</sub>Cl<sub>2</sub>)

M062X/6-311G\*

E(RM062X) = -204.788876622

Zero-point correction= 0.012555 (Hartree/Particle)

Thermal correction to Energy= 0.015140

Thermal correction to Enthalpy= 0.016085

Thermal correction to Gibbs Free Energy= -0.008096

Sum of electronic and ZPE= -204.776322

Sum of electronic and thermal Energies= -204.773736

Sum of electronic and thermal Enthalpies= -204.772792

Sum of electronic and thermal Free Energies= -204.796972

| E           | CV        | S         |
|-------------|-----------|-----------|
| KCal/Mol    | Cal/Mol-K | Cal/Mol-K |
| Total 9.501 | 6.672     | 50.892    |

N,0,0.,0.,0.

O,0,0.,0.,1.1050096647  
O,0,0.,0.,-1.1050096647

### TSs for Toluene + NO<sub>2</sub><sup>+</sup> M062X/6-311G\*/PCM(CH<sub>2</sub>Cl<sub>2</sub>)

#### TS Toluene + NO<sub>2</sub><sup>+</sup> ipso 190031

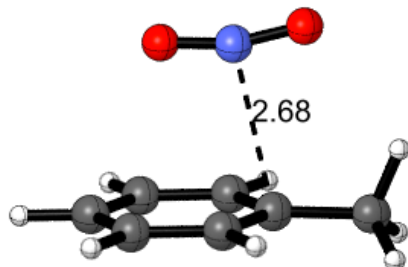

M062X/6-311G\*  
E(RM062X) = -476.296115891

Zero-point correction= 0.141325 (Hartree/Particle)  
Thermal correction to Energy= 0.150604  
Thermal correction to Enthalpy= 0.151548  
Thermal correction to Gibbs Free Energy= 0.106085  
Sum of electronic and ZPE= -476.154791  
Sum of electronic and thermal Energies= -476.145512  
Sum of electronic and thermal Enthalpies= -476.144567  
Sum of electronic and thermal Free Energies= -476.190031

| E        | CV        | S             |
|----------|-----------|---------------|
| KCal/Mol | Cal/Mol-K | Cal/Mol-K     |
| Total    | 94.506    | 33.264 95.686 |

C,0,2.1672683791,0.2486907575,-0.0004712612  
C,0,1.5625348931,-0.0974844662,1.2081640532  
C,0,0.3528173158,-0.7780810616,1.2088488719  
C,0,-0.2726812838,-1.1334771936,-0.0002270444  
C,0,0.3518313009,-0.7767183139,-1.2094310257  
C,0,1.5615584322,-0.0961373784,-1.2089937919  
C,0,-1.5482229909,-1.92620715,-0.0002035311  
H,0,3.1109815205,0.7810412512,-0.0005534484  
H,0,2.0368034317,0.1634132127,2.1466030878  
H,0,-0.1103170428,-1.0632187373,2.1477619935  
H,0,-0.1121037368,-1.0607846902,-2.1482740695  
H,0,2.0350421274,0.16583767,-2.1475302639  
H,0,-2.4330309543,-1.279601995,-0.0004969304  
H,0,-1.6138415968,-2.5570191297,0.886310191  
H,0,-1.6135964559,-2.5573480016,-0.8865091068  
N,0,-1.1032373006,1.4195320168,0.0007037226  
O,0,-0.1516379665,2.0013528584,0.0011227659  
O,0,-2.1768570722,1.102142351,0.0004667874

#### TS Toluene + NO<sub>2</sub><sup>+</sup> ortho 187860

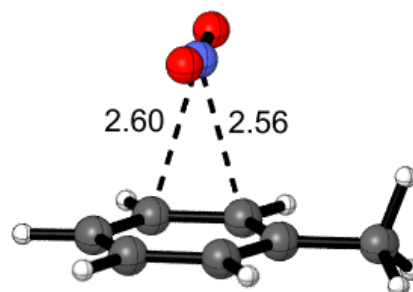

M062X/6-311G\*  
E(RM062X) = -476.294517695

Zero-point correction= 0.141530 (Hartree/Particle)  
Thermal correction to Energy= 0.150793  
Thermal correction to Enthalpy= 0.151737  
Thermal correction to Gibbs Free Energy= 0.106658  
Sum of electronic and ZPE= -476.152987  
Sum of electronic and thermal Energies= -476.143725  
Sum of electronic and thermal Enthalpies= -476.142781  
Sum of electronic and thermal Free Energies= -476.187860

| E        | CV        | S             |
|----------|-----------|---------------|
| KCal/Mol | Cal/Mol-K | Cal/Mol-K     |
| Total    | 94.624    | 33.285 94.876 |

C,0,-0.5370453891,1.6439196992,-0.3417689813  
C,0,0.3000637444,1.62370211,0.770636242  
C,0,1.3745771267,0.7145044368,0.8312402415  
C,0,1.6384611575,-0.1693810902,-0.2244298334  
C,0,0.7695380963,-0.1536089411,-1.3108920962  
C,0,-0.3082690004,0.7394096259,-1.3699189916  
C,0,2.7927172121,-1.1306323004,-0.150534918  
H,0,-1.3587472313,2.3467319397,-0.3966609169  
H,0,0.1439539419,2.3202021322,1.5873903479  
H,0,2.0347425662,0.7297203351,1.6934500313  
H,0,0.9323034965,-0.842482785,-2.1330428887  
H,0,-0.9624323514,0.726329728,-2.2337266311  
H,0,3.6561540251,-0.6707058127,0.3312374874  
H,0,3.0888765539,-1.4657179193,-1.1441972936  
H,0,2.5196327958,-2.0144126616,0.432365723  
N,0,-0.6052259966,-0.5593893368,1.8464850176  
O,0,-1.027666461,-1.049203666,0.932046291  
O,0,-0.4143452866,-0.3235974938,2.9288431692

#### TS Toluene + NO<sub>2</sub><sup>+</sup> ortho 188821

M062X/6-311G\*  
E(RM062X) = -476.294566581

Zero-point correction= 0.141190 (Hartree/Particle)  
Thermal correction to Energy= 0.150618  
Thermal correction to Enthalpy= 0.151562  
Thermal correction to Gibbs Free Energy= 0.105746  
Sum of electronic and ZPE= -476.153376  
Sum of electronic and thermal Energies= -476.143948  
Sum of electronic and thermal Enthalpies= -476.143004  
Sum of electronic and thermal Free Energies= -476.188821

E CV S  
KCal/Mol Cal/Mol-K Cal/Mol-K  
Total 94.514 33.406 96.429

C,0,1.1834182488,-1.8213603392,-0.0074468132  
C,0,0.9036265049,-1.102631014,-1.1637612621  
C,0,0.8259477107,0.2938919668,-1.1352153998  
C,0,1.0259422288,1.0087213506,0.0438879169  
C,0,1.3547508915,0.2826590341,1.194334319  
C,0,1.4244269157,-1.1267622855,1.173141158  
C,0,0.9117097384,2.5081850653,0.0656010201  
H,0,1.2264246262,-2.902957644,-0.0262113719  
H,0,0.7369076795,-1.625649349,-2.0980560501  
H,0,0.5995344072,0.832506658,-2.0497745405  
H,0,1.5201075769,0.8068040156,2.1307018113  
H,0,1.6469561262,-1.6628552483,2.0894211457  
H,0,1.5979451274,2.9618720438,-0.6523402558  
H,0,1.1313160887,2.9108719742,1.0539170941  
H,0,-0.098847885,2.8158046412,-0.2101700001  
N,0,3.7803704251,-0.2366731594,0.5802599905  
O,0,3.715183174,-0.2623974668,-0.5381135981  
O,0,4.2269824149,-0.1963352435,1.6116498359

### TS Toluene + NO<sub>2</sub>+ para 189331

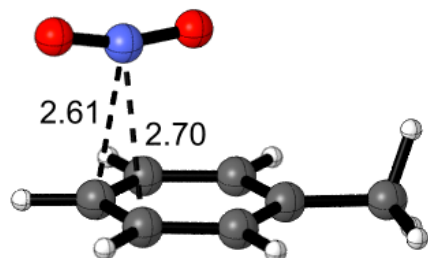

M062X/6-311G\*  
E(RM062X) = -476.295678690

Zero-point correction= 0.141612 (Hartree/Particle)  
Thermal correction to Energy= 0.150949  
Thermal correction to Enthalpy= 0.151893  
Thermal correction to Gibbs Free Energy= 0.106347  
Sum of electronic and ZPE= -476.154067  
Sum of electronic and thermal Energies= -476.144729  
Sum of electronic and thermal Enthalpies= -476.143785  
Sum of electronic and thermal Free Energies= -476.189331

E CV S  
KCal/Mol Cal/Mol-K Cal/Mol-K  
Total 94.722 33.253 95.860

C,0,-0.5435533055,1.6133674884,-0.3083296762  
C,0,0.3318768929,1.6372581043,0.7809606653  
C,0,1.3936532979,0.7494258262,0.8254657678  
C,0,1.6309136573,-0.1586602508,-0.2229857734  
C,0,0.777579219,-0.1452924296,-1.3266777776  
C,0,-0.3073665484,0.724622953,-1.3710041813  
C,0,2.7751687066,-1.1264478982,-0.1321259101  
H,0,-1.376263163,2.3065628837,-0.354950136  
H,0,0.1703229618,2.3373176015,1.5918387775  
H,0,2.062570149,0.7529677609,1.6798062069

H,0,0.9552977155,-0.8253658824,-2.1524845045  
H,0,-0.965379832,0.7289997335,-2.2329649359  
H,0,3.6727159558,-0.6350459515,0.2466695322  
H,0,3.0017548639,-1.5700743604,-1.1009643816  
H,0,2.5301109804,-1.9359216135,0.5613325559  
N,0,-1.8065947214,-0.5303172071,0.4876200744  
O,0,-0.9554220161,-1.081052024,0.956302857  
O,0,-2.8312568138,-0.2131517339,0.1622928397

### TS Toluene + NO<sub>2</sub>+ para 189465

M062X/6-311G\*  
E(RM062X) = -476.295695036

Zero-point correction= 0.141612 (Hartree/Particle)  
Thermal correction to Energy= 0.150957  
Thermal correction to Enthalpy= 0.151901  
Thermal correction to Gibbs Free Energy= 0.106230  
Sum of electronic and ZPE= -476.154083  
Sum of electronic and thermal Energies= -476.144738  
Sum of electronic and thermal Enthalpies= -476.143794  
Sum of electronic and thermal Free Energies= -476.189465

E CV S  
KCal/Mol Cal/Mol-K Cal/Mol-K  
Total 94.727 33.262 96.123

C,0,1.2371176234,-1.8033976043,-0.0727628045  
C,0,1.0643492992,-1.0837595813,-1.2588237738  
C,0,0.9829704918,0.2975163754,-1.2154069276  
C,0,1.0367001984,0.9948047667,0.0061344534  
C,0,1.1685482115,0.2660518842,1.1877953072  
C,0,1.2766097832,-1.1213122454,1.1546614612  
C,0,0.9480607965,2.4937237333,0.0128894923  
H,0,1.2989703182,-2.8859238401,-0.0951762409  
H,0,1.0105049196,-1.605076008,-2.2070036433  
H,0,0.8693324356,0.8596753922,-2.1366152781  
H,0,1.1964176281,0.7844498648,2.1398327963  
H,0,1.3772231459,-1.6802446042,2.0784899098  
H,0,0.0432919158,2.8261028619,-0.500587567  
H,0,1.7989605335,2.9301513584,-0.5161251439  
H,0,0.9350811516,2.8899775451,1.0273550526  
N,0,3.7789779476,-1.234438154,0.152308798  
O,0,3.771553092,-0.1998956799,-0.2680767254  
O,0,4.104723508,-2.2297850648,0.5512668336

**Product Structures for Toluene + NO<sub>2</sub><sup>+</sup>**  
**M062X/6-311G\*/PCM(CH<sub>2</sub>Cl<sub>2</sub>)**

**ipso Product 206704**

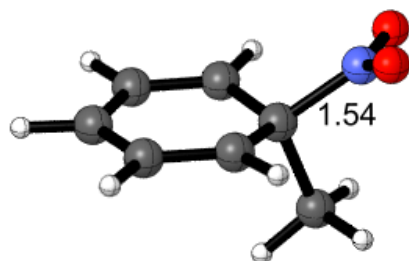

M062X/6-311G\*  
 E(RM062X) = -476.316372222

Zero-point correction= 0.143680 (Hartree/Particle)  
 Thermal correction to Energy= 0.152373  
 Thermal correction to Enthalpy= 0.153317  
 Thermal correction to Gibbs Free Energy= 0.109668  
 Sum of electronic and ZPE= -476.172692  
 Sum of electronic and thermal Energies= -476.163999  
 Sum of electronic and thermal Enthalpies= -476.163055  
 Sum of electronic and thermal Free Energies= -476.206704

| E            | CV        | S         |
|--------------|-----------|-----------|
| KCal/Mol     | Cal/Mol-K | Cal/Mol-K |
| Total 95.615 | 32.893    | 91.867    |

C,0,2.506597,0.004363,-0.35746  
 C,0,1.821609,1.235953,-0.366006  
 C,0,0.47896,1.246062,-0.150502  
 C,0,-0.222044,0.01277,0.247585  
 C,0,0.522533,-1.248143,0.090584  
 C,0,1.864563,-1.229623,-0.126688  
 C,0,-0.507674,0.15364,1.802645  
 H,0,3.571186,0.00263,-0.565688  
 H,0,2.354653,2.150549,-0.586194  
 H,0,-0.104587,2.158665,-0.19314  
 H,0,-0.019763,-2.174855,0.236525  
 H,0,2.43285,-2.148781,-0.161972  
 H,0,-1.080621,1.065581,1.957271  
 H,0,0.433726,0.199061,2.345977  
 H,0,-1.083665,-0.714579,2.118651  
 N,0,-1.621983,-0.053778,-0.384001  
 O,0,-2.212164,0.990342,-0.471944  
 O,0,-2.029981,-1.141836,-0.691102

**meta Product 209211**

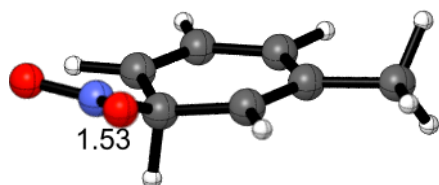

M062X/6-311G\*

E(RM062X) = -476.317016634

Zero-point correction= 0.142484 (Hartree/Particle)  
 Thermal correction to Energy= 0.151453  
 Thermal correction to Enthalpy= 0.152398  
 Thermal correction to Gibbs Free Energy= 0.107805  
 Sum of electronic and ZPE= -476.174532  
 Sum of electronic and thermal Energies= -476.165563  
 Sum of electronic and thermal Enthalpies= -476.164619  
 Sum of electronic and thermal Free Energies= -476.209211

| E            | CV        | S         |
|--------------|-----------|-----------|
| KCal/Mol     | Cal/Mol-K | Cal/Mol-K |
| Total 95.038 | 33.084    | 93.852    |

C,0,0.6875660452,-0.9364256012,-0.9367337752  
 C,0,1.3651837913,-2.0179307942,-0.4642351184  
 C,0,1.0332425181,-2.5417915931,0.7991123413  
 C,0,0.0131984715,-2.0266758448,1.6373168672  
 C,0,-0.6810987093,-0.9433043686,1.1807802261  
 C,0,-0.47358629,-0.4478800693,-0.1859691639  
 C,0,-0.2312838456,-2.6380690569,2.9859509581  
 H,0,0.9255971391,-0.4616764054,-1.880511529  
 H,0,2.1837123664,-2.4467666137,-1.0260582439  
 H,0,1.616551419,-3.3806323103,1.1688235704  
 H,0,-1.4504463492,-0.4634519897,1.7750905966  
 H,0,-1.3267598862,-0.9068428154,-0.7440467929  
 H,0,-0.9925709358,-2.0857612344,3.5334029514  
 H,0,0.6876332382,-2.6431063251,3.5740878912  
 H,0,-0.5645612667,-3.6712126057,2.8742500394  
 N,0,-0.7395716363,1.0490398443,-0.3573132393  
 O,0,-1.4159341394,1.572198211,0.4857827191  
 O,0,-0.2836009304,1.5618415724,-1.3430902979

**ortho Product 212984**

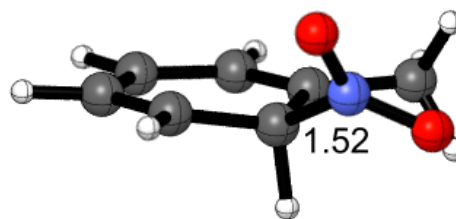

M062X/6-311G\*  
 E(RM062X) = -476.321390301

Zero-point correction= 0.142993 (Hartree/Particle)  
 Thermal correction to Energy= 0.151863  
 Thermal correction to Enthalpy= 0.152808  
 Thermal correction to Gibbs Free Energy= 0.108406  
 Sum of electronic and ZPE= -476.178398  
 Sum of electronic and thermal Energies= -476.169527  
 Sum of electronic and thermal Enthalpies= -476.168583  
 Sum of electronic and thermal Free Energies= -476.212984

| E            | CV        | S         |
|--------------|-----------|-----------|
| KCal/Mol     | Cal/Mol-K | Cal/Mol-K |
| Total 95.296 | 32.771    | 93.451    |

C,0,0.650428293,-1.1992474621,-1.795157402

C,0,1.5325085093,-2.1117890349,-1.1643259315  
 C,0,1.7226048612,-2.1671676253,0.2185232456  
 C,0,1.0450435924,-1.3166595151,1.0610808633  
 C,0,-0.0227372038,-0.4747224968,0.4450134691  
 C,0,-0.0549840997,-0.3402510706,-1.0252190145  
 C,0,1.2929319815,-1.2931890461,2.5216796779  
 H,0,0.5797483773,-1.1722367306,-2.8736400517  
 H,0,2.1145662045,-2.7813270832,-1.7887074913  
 H,0,2.4506172289,-2.8553839476,0.6287653644  
 H,0,-0.9433448888,-1.0532509394,0.6763450913  
 H,0,-0.7193435995,0.4041219837,-1.4474785467  
 H,0,1.654117331,-0.3045206563,2.8226938318  
 H,0,2.0326571462,-2.0413783639,2.7943975211  
 H,0,0.3688602558,-1.4622969597,3.0784768328  
 N,0,-0.2266439519,0.8506886157,1.1539514622  
 O,0,0.0610957192,1.8443606703,0.5390414736  
 O,0,-0.6520597569,0.7957206618,2.2797696049

### para Product 218203

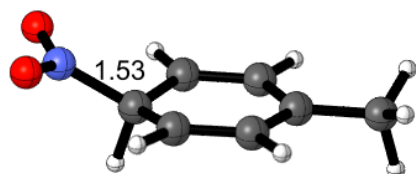

M062X/6-311G\*  
 E(RM062X) = -476.325950643

Zero-point correction= 0.142396 (Hartree/Particle)  
 Thermal correction to Energy= 0.151304  
 Thermal correction to Enthalpy= 0.152248  
 Thermal correction to Gibbs Free Energy= 0.107747  
 Sum of electronic and ZPE= -476.183555  
 Sum of electronic and thermal Energies= -476.174647  
 Sum of electronic and thermal Enthalpies= -476.173702  
 Sum of electronic and thermal Free Energies= -476.218203

| E            | CV        | S         |
|--------------|-----------|-----------|
| KCal/Mol     | Cal/Mol-K | Cal/Mol-K |
| Total 94.945 | 32.968    | 93.660    |

C,0,0.7360771244,-0.0002709661,0.469881242  
 C,0,0.0164015985,1.2589692412,0.2082599022  
 C,0,-1.321469905,1.2404089282,0.0097718584  
 C,0,-2.0203607344,0.0034402296,-0.0896358402  
 C,0,-1.3250793597,-1.2348623369,0.0071751287  
 C,0,0.0134388178,-1.2567114434,0.2043274759  
 C,0,-3.4813133516,0.0101271303,-0.2967286415  
 H,0,0.8821685472,-0.002735125,1.5728435287  
 H,0,0.5800106178,2.182728102,0.2494004641  
 H,0,-1.8684945708,2.1661756168,-0.1173216544  
 H,0,-1.8737530075,-2.1590676372,-0.1224074629  
 H,0,0.5751813784,-2.1818354006,0.2409845196  
 H,0,-3.8064567059,0.8783877945,-0.869231685  
 H,0,-3.9407247489,0.0955409055,0.6994154673  
 H,0,-3.8415112524,-0.9139319814,-0.7445300402  
 N,0,2.1747266763,-0.0015604569,-0.0497654389  
 O,0,2.685314064,-1.0774286123,-0.2104573187  
 O,0,2.6876478118,1.0733580117,-0.2091555052

### Pi Complexes for Toluene + NO<sub>2</sub><sup>+</sup> M062X/6-311G\*/PCM(CH<sub>2</sub>Cl<sub>2</sub>)

#### ipso N-Pi complex 191410

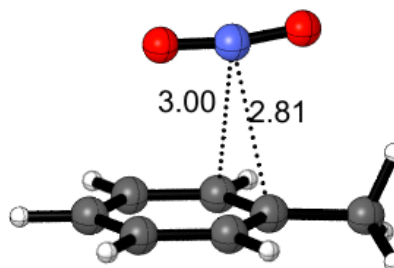

M062X/6-311G\*  
 E(RM062X) = -476.296104866

Zero-point correction= 0.141850 (Hartree/Particle)  
 Thermal correction to Energy= 0.151978  
 Thermal correction to Enthalpy= 0.152922  
 Thermal correction to Gibbs Free Energy= 0.104695  
 Sum of electronic and ZPE= -476.154255  
 Sum of electronic and thermal Energies= -476.144127  
 Sum of electronic and thermal Enthalpies= -476.143183  
 Sum of electronic and thermal Free Energies= -476.191410

| E            | CV        | S         |
|--------------|-----------|-----------|
| KCal/Mol     | Cal/Mol-K | Cal/Mol-K |
| Total 95.367 | 35.073    | 101.502   |

C,0,2.1495738018,-0.342989473,0.0010760284  
 C,0,1.5634500941,0.0367593582,-1.205514675  
 C,0,0.3929824921,0.7871233338,-1.2055983562  
 C,0,-0.2085796583,1.1803138549,0.0003221646  
 C,0,0.3912230097,0.7854893348,1.206645806  
 C,0,1.5616892812,0.0351389838,1.2073112094  
 C,0,-1.4461688013,2.0353549772,0.0001138875  
 H,0,3.0626734946,-0.9263808186,0.0013425784  
 H,0,2.020695139,-0.2498637761,-2.1451980265  
 H,0,-0.0513773844,1.0974455012,-2.1458353572  
 H,0,-0.0546069085,1.0945482965,2.1466102715  
 H,0,2.0174540454,-0.252898714,2.147284871  
 H,0,-2.3622220767,1.4342907718,0.0019340372  
 H,0,-1.4814434913,2.668908275,-0.8863188681  
 H,0,-1.4798039232,2.6715282648,0.884751737  
 N,0,-1.1925076611,-1.4507996971,-0.0017056564  
 O,0,-0.243491035,-2.0266656288,-0.0011828152  
 O,0,-2.2254434184,-1.0339338445,-0.0021618366



**ipso O-Pi complex 186028**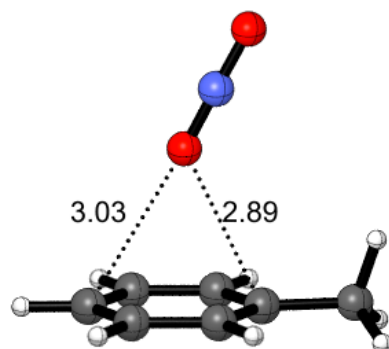

M062X/6-311G\*

E(RM062X) = -476.291663427

Zero-point correction= 0.142539 (Hartree/Particle)  
 Thermal correction to Energy= 0.152465  
 Thermal correction to Enthalpy= 0.153409  
 Thermal correction to Gibbs Free Energy= 0.105636  
 Sum of electronic and ZPE= -476.149124  
 Sum of electronic and thermal Energies= -476.139199  
 Sum of electronic and thermal Enthalpies= -476.138255  
 Sum of electronic and thermal Free Energies= -476.186028

| E        | CV        | S              |
|----------|-----------|----------------|
| KCal/Mol | Cal/Mol-K | Cal/Mol-K      |
| Total    | 95.673    | 34.509 100.547 |

C,0,-1.48808,-1.699732,0.000349  
 C,0,-1.356044,-1.010326,1.202963  
 C,0,-1.089886,0.356829,1.200512  
 C,0,-0.948409,1.060087,0.00026  
 C,0,-1.09165,0.357085,-1.199934  
 C,0,-1.357813,-1.010066,-1.202307  
 C,0,-0.607395,2.527007,0.000153  
 H,0,-1.700661,-2.762387,0.000391  
 H,0,-1.467367,-1.534712,2.145302  
 H,0,-0.9948,0.887147,2.143069  
 H,0,-0.997926,0.887629,-2.142499  
 H,0,-1.470543,-1.534213,-2.144611  
 H,0,-1.003142,3.02686,0.884942  
 H,0,-1.003616,3.02686,-0.884413  
 H,0,0.477968,2.668915,-0.000126  
 N,0,2.426069,-0.358906,-0.000576  
 O,0,1.365184,-0.67207,-0.001319  
 O,0,3.486474,-0.032813,0.000069

**meta N-Pi complex 189935**

M062X/6-311G\*

E(RM062X) = -476.295961987

Zero-point correction= 0.142018 (Hartree/Particle)  
 Thermal correction to Energy= 0.151977  
 Thermal correction to Enthalpy= 0.152922  
 Thermal correction to Gibbs Free Energy= 0.106027  
 Sum of electronic and ZPE= -476.153944  
 Sum of electronic and thermal Energies= -476.143985

Sum of electronic and thermal Enthalpies= -476.143040  
 Sum of electronic and thermal Free Energies= -476.189935

| E        | CV        | S             |
|----------|-----------|---------------|
| KCal/Mol | Cal/Mol-K | Cal/Mol-K     |
| Total    | 95.367    | 34.945 98.698 |

C,0,-0.566614,1.648636,-0.150145  
 C,0,0.231864,1.514868,0.98521  
 C,0,1.2888,0.612055,0.988483  
 C,0,1.581413,-0.167274,-0.139716  
 C,0,0.785221,-0.0152,-1.274862  
 C,0,-0.283342,0.881319,-1.283076  
 C,0,2.725979,-1.14336,-0.113405  
 H,0,-1.387225,2.357201,-0.16302  
 H,0,0.027435,2.11257,1.865867  
 H,0,1.903554,0.5082,1.877152  
 H,0,1.002174,-0.599212,-2.163031  
 H,0,-0.886114,0.993253,-2.178069  
 H,0,2.856685,-1.628261,-1.080674  
 H,0,2.558038,-1.91948,0.637275  
 H,0,3.658998,-0.63851,0.144967  
 N,0,-1.904649,-0.889763,0.289032  
 O,0,-1.051926,-1.255747,0.893449  
 O,0,-2.82069,-0.612213,-0.273277

**meta N-Pi complex 190153**

M062X/6-311G\*

E(RM062X) = -476.295477416

Zero-point correction= 0.141922 (Hartree/Particle)  
 Thermal correction to Energy= 0.151957  
 Thermal correction to Enthalpy= 0.152901  
 Thermal correction to Gibbs Free Energy= 0.105325  
 Sum of electronic and ZPE= -476.153555  
 Sum of electronic and thermal Energies= -476.143521  
 Sum of electronic and thermal Enthalpies= -476.142577  
 Sum of electronic and thermal Free Energies= -476.190153

| E        | CV        | S              |
|----------|-----------|----------------|
| KCal/Mol | Cal/Mol-K | Cal/Mol-K      |
| Total    | 95.354    | 34.932 100.132 |

C,0,0.354336,-1.781366,-0.365589  
 C,0,-0.528191,-1.723467,0.710543  
 C,0,-1.432964,-0.670576,0.816742  
 C,0,-1.484007,0.342912,-0.147074  
 C,0,-0.59152,0.279199,-1.218414  
 C,0,0.320365,-0.773966,-1.329731  
 C,0,-2.495812,1.452365,-0.045294  
 H,0,1.054198,-2.603415,-0.458484  
 H,0,-0.512272,-2.498297,1.468294  
 H,0,-2.115987,-0.634645,1.659596  
 H,0,-0.616137,1.049107,-1.983131  
 H,0,0.993707,-0.812982,-2.179655  
 H,0,-2.619596,1.784181,0.98658  
 H,0,-3.471004,1.107455,-0.398329  
 H,0,-2.207638,2.310542,-0.653011  
 N,0,1.918909,0.744044,0.459462  
 O,0,1.2209,0.687871,1.316574

O,0,2.680241,0.854522,-0.339724

### meta N-Pi complex 190249

M062X/6-311G\*

E(RM062X) = -476.295601518

Zero-point correction= 0.142032 (Hartree/Particle)  
 Thermal correction to Energy= 0.152141  
 Thermal correction to Enthalpy= 0.153085  
 Thermal correction to Gibbs Free Energy= 0.105353  
 Sum of electronic and ZPE= -476.153569  
 Sum of electronic and thermal Energies= -476.143461  
 Sum of electronic and thermal Enthalpies= -476.142517  
 Sum of electronic and thermal Free Energies= -476.190249

| E            | CV        | S         |
|--------------|-----------|-----------|
| KCal/Mol     | Cal/Mol-K | Cal/Mol-K |
| Total 95.470 | 34.945    | 100.460   |

C,0,-0.136271,1.886722,-0.423211  
 C,0,0.772256,1.747752,0.623788  
 C,0,1.516614,0.578944,0.755274  
 C,0,1.376206,-0.477198,-0.151636  
 C,0,0.451762,-0.334854,-1.188327  
 C,0,-0.297207,0.839693,-1.327328  
 C,0,2.22012,-1.715703,-0.013173  
 H,0,-0.709923,2.799001,-0.535028  
 H,0,0.903263,2.551506,1.338924  
 H,0,2.225324,0.484091,1.571946  
 H,0,0.327116,-1.136455,-1.910156  
 H,0,-0.995145,0.9356,-2.152353  
 H,0,1.892094,-2.501416,-0.693542  
 H,0,2.185926,-2.104003,1.006613  
 H,0,3.264786,-1.489324,-0.239542  
 N,0,-1.909878,-0.623969,0.497401  
 O,0,-1.321272,-0.34124,1.391216  
 O,0,-2.571875,-0.94918,-0.331339

### ortho N-Pi complex 189508

M062X/6-311G\*

E(RM062X) = -476.295731534

Zero-point correction= 0.142352 (Hartree/Particle)  
 Thermal correction to Energy= 0.152324  
 Thermal correction to Enthalpy= 0.153268  
 Thermal correction to Gibbs Free Energy= 0.106224  
 Sum of electronic and ZPE= -476.153379  
 Sum of electronic and thermal Energies= -476.143408  
 Sum of electronic and thermal Enthalpies= -476.142463  
 Sum of electronic and thermal Free Energies= -476.189508

| E            | CV        | S         |
|--------------|-----------|-----------|
| KCal/Mol     | Cal/Mol-K | Cal/Mol-K |
| Total 95.585 | 34.846    | 99.013    |

C,0,0.5562375542,1.6434878112,-0.167642926  
 C,0,0.2819617716,0.8575819862,-1.283383631  
 C,0,-0.7800371484,-0.053803273,-1.2570078873

C,0,-1.5880070585,-0.1874728055,-0.123999319  
 C,0,-1.2911580689,0.6016141734,0.9908897339  
 C,0,-0.2328371165,1.507272347,0.9719751166  
 C,0,-2.7649896336,-1.1257340309,-0.1110253199  
 H,0,1.3746199511,2.3532347205,-0.1864402328  
 H,0,0.8825659986,0.9568113219,-2.1811772917  
 H,0,-0.9962526403,-0.6494174421,-2.1391459789  
 H,0,-1.9008788738,0.5092648754,1.8839176639  
 H,0,-0.0247322701,2.1082354862,1.8496539776  
 H,0,-3.6864467213,-0.5754907572,-0.3174859129  
 H,0,-2.8806086296,-1.6034846318,0.8629653303  
 H,0,-2.666114218,-1.9027765478,-0.8696093477  
 N,0,1.3983159958,-1.5303244135,-0.0990032039  
 O,0,1.1979329044,-1.1561507012,0.9234101686  
 O,0,1.6671312034,-1.9776111189,-1.0783369397

### ortho O-Pi complex 187442

M062X/6-311G\*

E(RM062X) = -476.292124312

Zero-point correction= 0.142162 (Hartree/Particle)  
 Thermal correction to Energy= 0.152268  
 Thermal correction to Enthalpy= 0.153212  
 Thermal correction to Gibbs Free Energy= 0.104683  
 Sum of electronic and ZPE= -476.149962  
 Sum of electronic and thermal Energies= -476.139856  
 Sum of electronic and thermal Enthalpies= -476.138912  
 Sum of electronic and thermal Free Energies= -476.187442

| E            | CV        | S         |
|--------------|-----------|-----------|
| KCal/Mol     | Cal/Mol-K | Cal/Mol-K |
| Total 95.550 | 34.690    | 102.139   |

C,0,-0.921954,1.93888,0.014999  
 C,0,-1.034305,1.250841,-1.19041  
 C,0,-1.208317,-0.131338,-1.193721  
 C,0,-1.275962,-0.850605,0.002837  
 C,0,-1.15797,-0.147722,1.206129  
 C,0,-0.984065,1.233882,1.21506  
 C,0,-1.509356,-2.338373,0.000606  
 H,0,-0.790806,3.014693,0.019528  
 H,0,-0.989538,1.790129,-2.129895  
 H,0,-1.299263,-0.658938,-2.13814  
 H,0,-1.209644,-0.689369,2.145702  
 H,0,-0.900236,1.759866,2.159474  
 H,0,-2.575877,-2.556187,0.102334  
 H,0,-0.997005,-2.823538,0.832923  
 H,0,-1.167918,-2.794483,-0.929531  
 N,0,2.542212,-0.118414,-0.017595  
 O,0,1.482637,0.199607,-0.03503  
 O,0,3.60316,-0.44294,0.001002

### ortho O-Pi complex 187803

M062X/6-311G\*

E(RM062X) = -476.292122761

Zero-point correction= 0.142106 (Hartree/Particle)  
 Thermal correction to Energy= 0.152247

Thermal correction to Enthalpy= 0.153192  
 Thermal correction to Gibbs Free Energy= 0.104320  
 Sum of electronic and ZPE= -476.150017  
 Sum of electronic and thermal Energies= -476.139875  
 Sum of electronic and thermal Enthalpies= -476.138931  
 Sum of electronic and thermal Free Energies= -476.187803

E CV S  
 KCal/Mol Cal/Mol-K Cal/Mol-K  
 Total 95.537 34.703 102.859

C,0,0.925866,1.938147,-0.005811  
 C,0,1.019102,1.245465,1.19851  
 C,0,1.19051,-0.1372,1.199127  
 C,0,1.274434,-0.852125,0.000982  
 C,0,1.175587,-0.144407,-1.201281  
 C,0,1.00459,1.237494,-1.207466  
 C,0,1.504895,-2.340377,0.000501  
 H,0,0.796481,3.014158,-0.008471  
 H,0,0.961436,1.781097,2.139407  
 H,0,1.266672,-0.6686,2.142707  
 H,0,1.240265,-0.68247,-2.14212  
 H,0,0.935772,1.767394,-2.150873  
 H,0,1.157842,-2.798258,0.927657  
 H,0,2.57145,-2.560157,-0.09658  
 H,0,0.995683,-2.822263,-0.835676  
 N,0,-2.542843,-0.115552,0.005189  
 O,0,-1.483369,0.203211,0.010074  
 O,0,-3.603581,-0.441213,-0.000042

### para N-Pi complex 189915

M062X/6-311G\*  
 E(RM062X) = -476.295984404

Zero-point correction= 0.141599 (Hartree/Particle)  
 Thermal correction to Energy= 0.150964  
 Thermal correction to Enthalpy= 0.151908  
 Thermal correction to Gibbs Free Energy= 0.106069  
 Sum of electronic and ZPE= -476.154386  
 Sum of electronic and thermal Energies= -476.145020  
 Sum of electronic and thermal Enthalpies= -476.144076  
 Sum of electronic and thermal Free Energies= -476.189915

E CV S  
 KCal/Mol Cal/Mol-K Cal/Mol-K  
 Total 94.731 33.128 96.476

C,0,-0.619284,1.588824,-0.108409  
 C,0,0.122251,1.410011,1.059896  
 C,0,1.217505,0.555026,1.061082  
 C,0,1.607116,-0.125408,-0.100793  
 C,0,0.864963,0.070472,-1.266805  
 C,0,-0.241909,0.91691,-1.274702  
 C,0,2.812738,-1.024983,-0.085461  
 H,0,-1.472228,2.258462,-0.117617  
 H,0,-0.158698,1.933239,1.966463  
 H,0,1.785167,0.410662,1.974851  
 H,0,1.154056,-0.442251,-2.178002  
 H,0,-0.800719,1.067728,-2.191798  
 H,0,3.728312,-0.430252,-0.034428

H,0,2.862371,-1.640641,-0.983509  
 H,0,2.802914,-1.68262,0.785654  
 N,0,-1.910165,-0.912844,0.208883  
 O,0,-1.021153,-1.413786,0.640268  
 O,0,-2.867633,-0.514905,-0.189349

### para N-Pi complex 190032

M062X/6-311G\*  
 E(RM062X) = -476.295972760

Zero-point correction= 0.142122 (Hartree/Particle)  
 Thermal correction to Energy= 0.152111  
 Thermal correction to Enthalpy= 0.153055  
 Thermal correction to Gibbs Free Energy= 0.105940  
 Sum of electronic and ZPE= -476.153851  
 Sum of electronic and thermal Energies= -476.143862  
 Sum of electronic and thermal Enthalpies= -476.142918  
 Sum of electronic and thermal Free Energies= -476.190032

E CV S  
 KCal/Mol Cal/Mol-K Cal/Mol-K  
 Total 95.451 34.938 99.161

C,0,-0.6388762601,1.5696736671,0.0040454767  
 C,0,-0.0753284116,1.1544719318,1.2115852809  
 C,0,1.0486367875,0.3329302965,1.2087953706  
 C,0,1.6320799698,-0.0824679734,0.008746454  
 C,0,1.0636843333,0.3505731406,-1.1956402649  
 C,0,-0.058387267,1.1699312136,-1.2033017963  
 C,0,2.8365655878,-0.9836878909,-0.0024101185  
 H,0,-1.5068904481,2.2202134349,0.0023552685  
 H,0,-0.5077693008,1.4781275452,2.1516031391  
 H,0,1.4816088099,0.0128507689,2.1507130514  
 H,0,1.512174078,0.0430889002,-2.1349790515  
 H,0,-0.4785841039,1.5064611117,-2.1443282528  
 H,0,2.5620655248,-1.9892016494,-0.332142453  
 H,0,3.28319924,-1.0645790799,0.9884021472  
 H,0,3.5945166451,-0.6108323663,-0.6935576987  
 N,0,-1.9270525762,-0.9506410492,-0.0075061625  
 O,0,-0.9967805058,-1.5515576504,-0.0110505825  
 O,0,-2.9179141027,-0.4497263512,-0.0051978077

### para N-Pi complex 190293

M062X/6-311G\*  
 E(RM062X) = -476.296006510

Zero-point correction= 0.141913 (Hartree/Particle)  
 Thermal correction to Energy= 0.151943  
 Thermal correction to Enthalpy= 0.152887  
 Thermal correction to Gibbs Free Energy= 0.105714  
 Sum of electronic and ZPE= -476.154094  
 Sum of electronic and thermal Energies= -476.144064  
 Sum of electronic and thermal Enthalpies= -476.143120  
 Sum of electronic and thermal Free Energies= -476.190293

E CV S  
 KCal/Mol Cal/Mol-K Cal/Mol-K  
 Total 95.346 35.032 99.284

C,0,0.629224,1.59598,-0.101083  
 C,0,0.247736,0.933174,-1.272232  
 C,0,-0.863614,0.094234,-1.269694  
 C,0,-1.605615,-0.107229,-0.103331  
 C,0,-1.215589,0.567167,1.060689  
 C,0,-0.114641,1.416387,1.064602  
 C,0,-2.78129,-1.045524,-0.087993  
 H,0,1.484514,2.262593,-0.106933  
 H,0,0.805993,1.089298,-2.188768  
 H,0,-1.158993,-0.408296,-2.184742  
 H,0,-1.786958,0.425674,1.972382  
 H,0,0.16511,1.937224,1.972899  
 H,0,-3.550929,-0.701861,0.603923  
 H,0,-2.46936,-2.04276,0.235063  
 H,0,-3.224149,-1.142186,-1.07961  
 N,0,1.888091,-0.926765,0.207504  
 O,0,0.990675,-1.418441,0.632198  
 O,0,2.851934,-0.538742,-0.18501

### TS for the migration of $\text{NO}_2^+$ from *ipso* to *ortho*

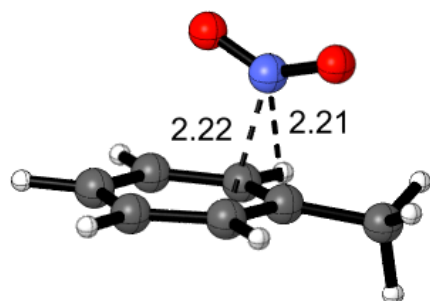

Scrf=(solvent=dichloromethane)  
 m062x/6-311G\*  
 E(RM062X) = -476.302669724

Zero-point correction= 0.141605 (Hartree/Particle)  
 Thermal correction to Energy= 0.150243  
 Thermal correction to Enthalpy= 0.151188  
 Thermal correction to Gibbs Free Energy= 0.108239  
 Sum of electronic and ZPE= -476.161065  
 Sum of electronic and thermal Energies= -476.152426  
 Sum of electronic and thermal Enthalpies= -476.151482  
 Sum of electronic and thermal Free Energies= -476.194431

| E            | CV        | S         |
|--------------|-----------|-----------|
| KCal/Mol     | Cal/Mol-K | Cal/Mol-K |
| Total 94.279 | 32.609    | 90.393    |

C,0,0.1719202161,0.5186216559,0.1194991911  
 C,0,0.2052091644,0.2401799303,1.5321778975  
 C,0,1.3908187831,-0.1438193477,2.1649975075  
 C,0,2.5164779705,-0.3391461263,1.3975337687  
 C,0,2.5006535919,-0.0849774777,-0.000500622  
 C,0,1.3645681283,0.361755791,-0.6235817863  
 H,0,-0.7024120498,0.3902473263,2.1078705062  
 H,0,1.3997029568,-0.3266375682,3.2312600527  
 H,0,3.4346139323,-0.6834264978,1.8580302445  
 H,0,3.4087890605,-0.2357292737,-0.5711589485  
 C,0,-1.048645912,1.1112253491,-0.4940469319

N,0,-0.3763519628,-1.5945512614,0.4350723136  
 H,0,-1.9554269383,0.8305419608,0.0417133385  
 H,0,-0.9591030465,2.2008131442,-0.4238118605  
 H,0,-1.1397541357,0.8469332254,-1.5469306938  
 O,0,-1.5347204034,-1.6216534966,0.3596449594  
 O,0,0.5334658982,-2.3052120233,0.3816892307  
 H,0,1.3583977465,0.5825146898,-1.6841041673

### TSs and CVTSs for Toluene + $\text{NO}_2^+\text{BF}_4^-$ ONIOM(M062X/6-311G\*: PM3)/PCM( $\text{CH}_2\text{Cl}_2$ )

#### TS NO2BF4 PCM ONIOM 2.596\_94018

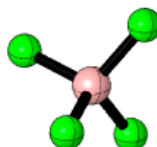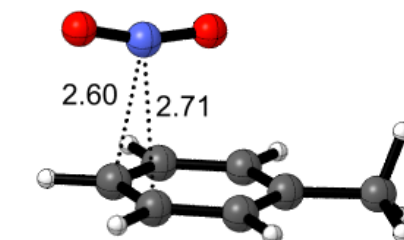

ONIOM(M062X/6-311G\*:  
 PM3)  
 E(RPM3) = 0.276289546170

Zero-point correction= 0.156550 (Hartree/Particle)  
 Thermal correction to Energy= 0.173208  
 Thermal correction to Enthalpy= 0.174153  
 Thermal correction to Gibbs Free Energy= 0.105710  
 Sum of electronic and ZPE= -476.889342  
 Sum of electronic and thermal Energies= -476.872684  
 Sum of electronic and thermal Enthalpies= -476.871740  
 Sum of electronic and thermal Free Energies= -476.940182

| E             | CV        | S         |
|---------------|-----------|-----------|
| KCal/Mol      | Cal/Mol-K | Cal/Mol-K |
| Total 108.690 | 54.241    | 144.049   |

C,0,-2.6750868221,-1.4450653026,0.9828832779  
 C,0,-2.5040158475,-0.2625959191,1.7089629213  
 C,0,-2.9659197248,0.9336015956,1.1861691486  
 C,0,-3.6356270313,0.978620074,-0.0500217921  
 C,0,-3.8424005293,-0.2139864295,-0.7457798979  
 C,0,-3.3616106466,-1.4175909998,-0.2431453722  
 C,0,-4.0944536161,2.2940543599,-0.6092199975  
 H,0,-2.3182803499,-2.3878800668,1.3827134923  
 H,0,-1.9966904161,-0.2824724102,2.6660905215

H,0,-2.8128539199,1.8566838461,1.7354393182  
 H,0,-4.3738275336,-0.1990210904,-1.6908384857  
 H,0,-3.5249027646,-2.3403893541,-0.7885766553  
 H,0,-3.2536472815,2.8199896921,-1.0710205756  
 H,0,-4.48886255,2.9384181701,0.1775894623  
 H,0,-4.8626986396,2.1584178923,-1.3699058876  
 N,0,-0.7230961856,-0.9221129588,-0.6475052607  
 O,0,-0.8577705552,0.1797627829,-0.7745931324  
 O,0,-0.3091521567,-1.9636809271,-0.689433912  
 F,0,3.6345058339,-0.678394182,-0.6012902021  
 B,0,4.4043348073,0.2674850522,0.0445426799  
 F,0,5.3512354381,-0.3638945191,0.823102373  
 F,0,5.0284029508,1.0664143303,-0.8904072038  
 F,0,3.5940685401,1.044987364,0.84647118

H,0,-1.5805447968,2.2903776473,0.9206664874  
 H,0,-4.5882807817,-0.1478398962,-0.926440983  
 H,0,-3.8313156484,-2.086678476,0.4091663052  
 H,0,-4.203258574,3.0430821593,-0.2811859366  
 H,0,-4.1677465731,2.0953466686,-1.7699655222  
 H,0,-2.7278383181,2.9837593653,-1.2389958367  
 N,0,-1.0127362199,-1.5370397775,-0.8012895032  
 O,0,-0.8466721162,-2.625438221,-0.5878976788  
 O,0,-0.9788531623,-0.521766717,-1.2654073403  
 F,0,3.0720407201,-0.3664111865,-0.7720125981  
 B,0,4.0123538479,0.2706131387,0.0118743057  
 F,0,4.7894432063,-0.6727870397,0.6508763568  
 F,0,4.8097315258,1.0663826949,-0.7834376731  
 F,0,3.3710968969,1.0517912867,0.950912163

### TS NO2BF4 PCM ONIOM 2.605\_94107

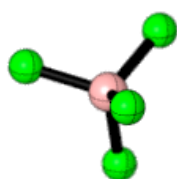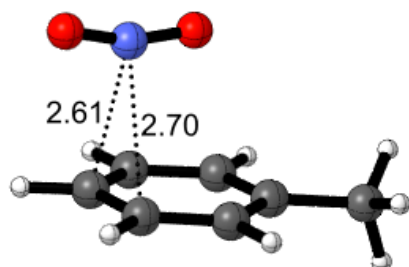

ONIOM(M062X/6-311G\*:PM3)  
 E(RPM3) = 0.276199237599

Zero-point correction= 0.156724 (Hartree/Particle)  
 Thermal correction to Energy= 0.173431  
 Thermal correction to Enthalpy= 0.174375  
 Thermal correction to Gibbs Free Energy= 0.104649  
 Sum of electronic and ZPE= -476.889068  
 Sum of electronic and thermal Energies= -476.872361  
 Sum of electronic and thermal Enthalpies= -476.871417  
 Sum of electronic and thermal Free Energies= -476.941143

| E             | CV        | S         |
|---------------|-----------|-----------|
| KCal/Mol      | Cal/Mol-K | Cal/Mol-K |
| Total 108.830 | 54.230    | 146.751   |

C,0,-2.2669844045,-0.9912855138,1.4162855093  
 C,0,-1.6531620259,0.2539137337,1.5801027024  
 C,0,-2.0729649762,1.3292075432,0.8146072886  
 C,0,-3.131470379,1.2026068148,-0.103427409  
 C,0,-3.7648748462,-0.0345772069,-0.2302321635  
 C,0,-3.3363489235,-1.1276544078,0.5148664178  
 C,0,-3.5805488844,2.3926487205,-0.9015632609  
 H,0,-1.947642179,-1.8409397423,2.0097141152  
 H,0,-0.8417093879,0.3702544115,2.288543254

### TS NO2BF4 PCM ONIOM 2.607\_93956

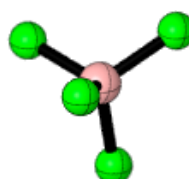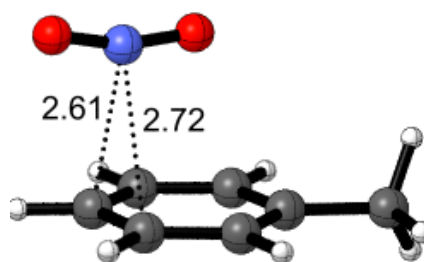

ONIOM(M062X/6-311G\*:PM3)  
 E(RPM3) = 0.275743056438

Zero-point correction= 0.157050 (Hartree/Particle)  
 Thermal correction to Energy= 0.173587  
 Thermal correction to Enthalpy= 0.174531  
 Thermal correction to Gibbs Free Energy= 0.106233  
 Sum of electronic and ZPE= -476.888744  
 Sum of electronic and thermal Energies= -476.872207  
 Sum of electronic and thermal Enthalpies= -476.871263  
 Sum of electronic and thermal Free Energies= -476.939561

| E             | CV        | S         |
|---------------|-----------|-----------|
| KCal/Mol      | Cal/Mol-K | Cal/Mol-K |
| Total 108.928 | 54.104    | 143.745   |

C,0,-2.9533365588,-1.2001956215,1.0391206817  
 C,0,-2.346265656,-0.1367943783,1.7150542644  
 C,0,-2.3306145992,1.1212256158,1.1377236552  
 C,0,-2.9433287343,1.3604463597,-0.1063746993  
 C,0,-3.5839209018,0.3023921787,-0.7526108366  
 C,0,-3.5866730989,-0.9707455506,-0.1932185255

C,0,-2.8942365383,2.7328469908,-0.7130966515  
 H,0,-2.9734796907,-2.1896378522,1.4822446976  
 H,0,-1.8763771925,-0.3024566631,2.6772381666  
 H,0,-1.8384622263,1.9425286337,1.6488192907  
 H,0,-4.0734021437,0.4721701504,-1.7051098672  
 H,0,-4.0865760538,-1.7875678505,-0.7018994828  
 H,0,-3.2753171097,3.4773956171,-0.0111303028  
 H,0,-3.4818277691,2.7863768581,-1.6287471509  
 H,0,-1.8632627115,3.0085621276,-0.9499014719  
 N,0,-0.9498472462,-1.5123785781,-0.6003474817  
 O,0,-0.6727150649,-0.4448722443,-0.7733649719  
 O,0,-0.9562858454,-2.6335296065,-0.5919091797  
 F,0,3.1203605941,0.8314416412,0.8176231126  
 B,0,4.0735292224,0.2099035439,0.0373069546  
 F,0,4.8451401581,1.1616151532,-0.5953012429  
 F,0,4.8740321896,-0.5806311744,0.8352334436  
 F,0,3.4481169769,-0.5787903508,-0.9067994022

### TS NO2BF4 PCM ONIOM 2.609\_93861

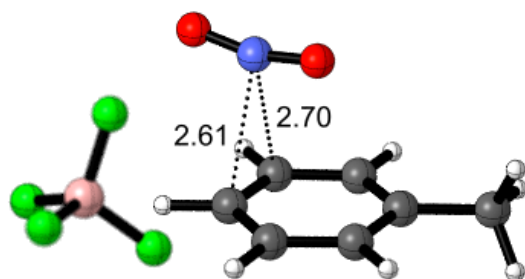

ONIOM(M062X/6-311G\*:PM3)  
 E(RPM3) = 0.276187286919

Zero-point correction= 0.156846 (Hartree/Particle)  
 Thermal correction to Energy= 0.173315  
 Thermal correction to Enthalpy= 0.174259  
 Thermal correction to Gibbs Free Energy= 0.107775  
 Sum of electronic and ZPE= -476.889544  
 Sum of electronic and thermal Energies= -476.873075  
 Sum of electronic and thermal Enthalpies= -476.872131  
 Sum of electronic and thermal Free Energies= -476.938616

| E             | CV        | S         |
|---------------|-----------|-----------|
| KCal/Mol      | Cal/Mol-K | Cal/Mol-K |
| Total 108.757 | 54.156    | 139.928   |

C,0,-1.141141,0.34911,1.435769  
 C,0,-2.446576,0.859763,1.34469  
 C,0,-3.412049,0.181075,0.607708  
 C,0,-3.092585,-1.000356,-0.060814  
 C,0,-1.784618,-1.507821,0.050302  
 C,0,-0.822272,-0.855222,0.801951  
 C,0,-4.108618,-1.731236,-0.890524  
 H,0,-0.395888,0.868413,2.028154  
 H,0,-2.702367,1.77737,1.862753  
 H,0,-4.4185,0.579074,0.544542  
 H,0,-1.532957,-2.430206,-0.462876  
 H,0,0.179544,-1.263401,0.883707  
 H,0,-3.826679,-1.709787,-1.946517  
 H,0,-5.099355,-1.289388,-0.791559

H,0,-4.164384,-2.780222,-0.592394  
 N,0,-1.006739,1.76587,-0.75135  
 O,0,-1.407796,1.024254,-1.484012  
 O,0,-0.539607,2.674689,-0.290257  
 F,0,3.485517,0.469511,1.079387  
 B,0,3.54916,-0.329812,-0.043275  
 F,0,4.799774,-0.90264,-0.136114  
 F,0,2.593724,-1.321434,0.042984  
 F,0,3.308576,0.440417,-1.162959

### CVTS NO2BF4 PCM ONIOM 940511

ONIOM(M062X/6-311G\*:PM3)

Zero-point correction= 0.157810 (Hartree/Particle)  
 Thermal correction to Energy= 0.173570  
 Thermal correction to Enthalpy= 0.174514  
 Thermal correction to Gibbs Free Energy= 0.113420  
 Sum of electronic and ZPE= -476.896120  
 Sum of electronic and thermal Energies= -476.880361  
 Sum of electronic and thermal Enthalpies= -476.879417  
 Sum of electronic and thermal Free Energies= -476.940511

| E             | CV        | S         |
|---------------|-----------|-----------|
| KCal/Mol      | Cal/Mol-K | Cal/Mol-K |
| Total 108.917 | 53.889    | 128.583   |

C,0,1.7726430496,2.5274859545,0.240607936  
 C,0,2.8292589405,1.7903559498,0.7792647208  
 C,0,3.0323207689,0.4751898159,0.3877278275  
 C,0,2.1811200223,-0.1324809068,-0.5511615161  
 C,0,1.120903404,0.6232021886,-1.0843309495  
 C,0,0.923467677,1.9435074253,-0.6962544567  
 C,0,2.4119857903,-1.5483440568,-0.995604446  
 H,0,1.6124348637,3.5519354883,0.5533989076  
 H,0,3.4883825545,2.2441521946,1.5090553414  
 H,0,3.859738788,-0.0947654829,0.8035006892  
 H,0,0.4372075869,0.1578963808,-1.7922498013  
 H,0,0.0971893364,2.5085782374,-1.1099938065  
 H,0,1.4849672211,-2.0258494483,-1.3219437276  
 H,0,2.8623115577,-2.1502267662,-0.2048005008  
 H,0,3.0975054607,-1.5611752144,-1.8470008158  
 N,0,0.3927626694,-0.5153161317,1.4621973487  
 O,0,0.3748899157,-1.616734835,1.2706915126  
 O,0,0.2697508018,0.5154684258,1.8694208377  
 F,0,-1.118223307,-1.9341451047,-1.1353371699  
 B,0,-2.1167102286,-0.9863438358,-1.0458060102  
 F,0,-1.8222726,-0.1757559868,0.0408847399  
 F,0,-2.1543965771,-0.2286247,-2.1938722023  
 F,0,-3.3316067866,-1.5998445914,-0.8441094589

CVTS NO2BF4 PCM ONIOM 940237 (6c<sup>‡</sup>)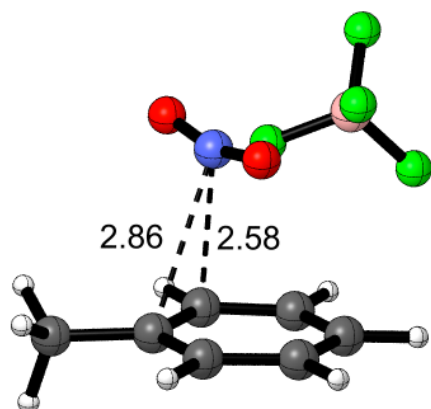

ONIOM(M062X/6-311G\*:PM3)

Zero-point correction= 0.157445 (Hartree/Particle)  
 Thermal correction to Energy= 0.173403  
 Thermal correction to Enthalpy= 0.174347  
 Thermal correction to Gibbs Free Energy= 0.111801  
 Sum of electronic and ZPE= -476.894592  
 Sum of electronic and thermal Energies= -476.878634  
 Sum of electronic and thermal Enthalpies= -476.877690  
 Sum of electronic and thermal Free Energies= -476.940237

| E             | CV        | S         |
|---------------|-----------|-----------|
| KCal/Mol      | Cal/Mol-K | Cal/Mol-K |
| Total 108.812 | 53.944    | 131.641   |

|   |           |           |           |
|---|-----------|-----------|-----------|
| 6 | 1.162594  | 2.052032  | 0.027483  |
| 6 | 2.420896  | 1.786859  | 0.576235  |
| 6 | 3.108754  | 0.618414  | 0.257979  |
| 6 | 2.547968  | -0.327074 | -0.597824 |
| 6 | 1.260489  | -0.067365 | -1.114869 |
| 6 | 0.587322  | 1.128557  | -0.829996 |
| 6 | 3.299343  | -1.563081 | -1.003210 |
| 1 | 0.639542  | 2.965705  | 0.279393  |
| 1 | 2.869039  | 2.501467  | 1.255678  |
| 1 | 4.089707  | 0.439999  | 0.683566  |
| 1 | 0.798385  | -0.791333 | -1.780470 |
| 1 | -0.401359 | 1.298649  | -1.247357 |
| 1 | 3.868666  | -1.363493 | -1.914962 |
| 1 | 2.623925  | -2.392726 | -1.217956 |
| 1 | 4.004169  | -1.872292 | -0.231650 |
| 7 | 0.364926  | -1.033384 | 1.101319  |
| 8 | -0.067757 | -1.971783 | 0.658998  |
| 8 | 0.662400  | -0.255219 | 1.849836  |
| 9 | -1.977631 | 0.248247  | 0.949054  |
| 5 | -2.747493 | 0.067043  | -0.189773 |
| 9 | -3.948033 | -0.510810 | 0.152936  |
| 9 | -2.966927 | 1.277723  | -0.805782 |
| 9 | -2.039679 | -0.775329 | -1.024216 |

## TS NO2BF4 PCM ONIOM 2.609\_94138

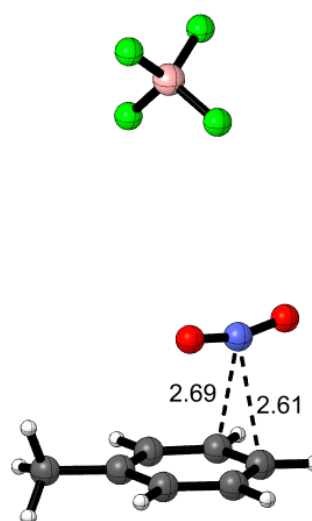ONIOM(M062X/6-311G\*:PM3)  
E(RPM3) = 0.276337070450

Zero-point correction= 0.156436 (Hartree/Particle)  
 Thermal correction to Energy= 0.173186  
 Thermal correction to Enthalpy= 0.174131  
 Thermal correction to Gibbs Free Energy= 0.104413  
 Sum of electronic and ZPE= -476.889365  
 Sum of electronic and thermal Energies= -476.872614  
 Sum of electronic and thermal Enthalpies= -476.871670  
 Sum of electronic and thermal Free Energies= -476.941388

| E             | CV        | S         |
|---------------|-----------|-----------|
| KCal/Mol      | Cal/Mol-K | Cal/Mol-K |
| Total 108.676 | 54.278    | 146.734   |

|                                               |
|-----------------------------------------------|
| C,0,-3.3094513666,-1.5601810401,0.1154391825  |
| C,0,-3.5151836577,-0.7721911543,1.2507907225  |
| C,0,-3.513809622,0.6076734124,1.1349944023    |
| C,0,-3.3416619794,1.2365624301,-0.1126472721  |
| C,0,-3.1801378907,0.4411558921,-1.2466085333  |
| C,0,-3.1538260358,-0.9458405401,-1.1389322494 |
| C,0,-3.3200758338,2.7353197005,-0.199059069   |
| H,0,-3.3109278073,-2.641589153,0.192155557    |
| H,0,-3.6584003652,-1.2395436347,2.2175987841  |
| H,0,-3.6502059683,1.2220787223,2.0190580771   |
| H,0,-3.0604484662,0.9070135916,-2.2185508049  |
| H,0,-3.0261785813,-1.5572296931,-2.0256699005 |
| H,0,-3.3873947169,3.0776907173,-1.2310299378  |
| H,0,-2.3922981684,3.1260518242,0.2281196268   |
| H,0,-4.1457446974,3.1692413714,0.3675634328   |
| N,0,-0.7360338145,-1.1364852696,0.0225442567  |
| O,0,-0.4392952885,-2.1639976787,-0.3153149728 |
| O,0,-0.7072313714,-0.0867064979,0.4035093715  |
| F,0,5.3613674993,-0.5403606028,-0.6226608844  |
| B,0,4.4151476502,0.2310319945,0.0187303481    |
| F,0,5.0405289368,1.1714819982,0.8099468911    |
| F,0,3.6281475548,0.8676444416,-0.919099954    |
| F,0,3.6219869904,-0.5781068319,0.8065769258   |

**TS NO2BF4 PCM ONIOM 2.611\_93953**

ONIOM(M062X/6-311G\*:PM3)

E(RPM3) = 0.276799127793

Zero-point correction= 0.157066 (Hartree/Particle)  
 Thermal correction to Energy= 0.173641  
 Thermal correction to Enthalpy= 0.174585  
 Thermal correction to Gibbs Free Energy= 0.106473  
 Sum of electronic and ZPE= -476.888948  
 Sum of electronic and thermal Energies= -476.872372  
 Sum of electronic and thermal Enthalpies= -476.871428  
 Sum of electronic and thermal Free Energies= -476.939540

| E             | CV        | S         |
|---------------|-----------|-----------|
| KCal/Mol      | Cal/Mol-K | Cal/Mol-K |
| Total 108.961 | 54.150    | 143.354   |

C,0,-3.1851351685,-1.1370697472,-0.7819697525  
 C,0,-3.8692077091,-0.4981942687,0.2547543425  
 C,0,-3.5169693561,0.7922826011,0.6136403913  
 C,0,-2.5048364517,1.4918553414,-0.070406071  
 C,0,-1.8587510044,0.8629613648,-1.1344348395  
 C,0,-2.1831507088,-0.4442963687,-1.4846742468  
 C,0,-2.12610192,2.8795255219,0.3597490167  
 H,0,-3.4523393173,-2.1465603433,-1.0737960739  
 H,0,-4.6591283282,-1.0167380018,0.7843872428  
 H,0,-4.0309511305,1.2817616621,1.4343353411  
 H,0,-1.0866655126,1.3912550156,-1.6832062639  
 H,0,-1.6737569836,-0.9277320913,-2.3112885881  
 H,0,-1.495644503,2.83937431,1.2527257306  
 H,0,-3.0105892945,3.4661881024,0.6122874393  
 H,0,-1.570948711,3.4002711952,-0.4198908877  
 N,0,-1.0412025106,-1.6306214756,0.6241130087  
 O,0,-1.0628013505,-0.7450107001,1.3054428202  
 O,0,-0.7869000475,-2.6215025142,0.1634609924  
 F,0,4.6525434942,0.793887154,-0.9694176894  
 B,0,3.8683055771,0.1565381417,-0.0313856429  
 F,0,4.6582035447,-0.6441683714,0.7670079786  
 F,0,3.2279972937,1.0950580464,0.7514038404  
 F,0,2.926630098,-0.6233975742,-0.671230089

**TS NO2BF4 PCM ONIOM 2.610\_94049**

ONIOM(M062X/6-311G\*:PM3)

E(RPM3) = 0.276300266484

Zero-point correction= 0.156770 (Hartree/Particle)  
 Thermal correction to Energy= 0.173457  
 Thermal correction to Enthalpy= 0.174401  
 Thermal correction to Gibbs Free Energy= 0.105311  
 Sum of electronic and ZPE= -476.889033  
 Sum of electronic and thermal Energies= -476.872347  
 Sum of electronic and thermal Enthalpies= -476.871402  
 Sum of electronic and thermal Free Energies= -476.940492

| E             | CV        | S         |
|---------------|-----------|-----------|
| KCal/Mol      | Cal/Mol-K | Cal/Mol-K |
| Total 108.846 | 54.161    | 145.412   |

C,0,3.3198182545,-1.5280803069,-0.1132524094  
 C,0,2.9719067116,-0.8256111231,-1.27927259

C,0,2.9397899672,0.565484325,-1.2741872659  
 C,0,3.2337573345,1.2761887374,-0.1108854678  
 C,0,3.5977537962,0.5603397676,1.0453403394  
 C,0,3.6577222184,-0.8229786235,1.0453922282  
 C,0,3.1586997358,2.7752383753,-0.0700338292  
 H,0,3.3641322821,-2.6112761288,-0.1270582991  
 H,0,2.7395505925,-1.3719831021,-2.1868802698  
 H,0,2.6721567015,1.1012645203,-2.1780927975  
 H,0,3.8371293035,1.110319138,1.9495903835  
 H,0,3.9477123575,-1.3585818856,1.9412153786  
 H,0,4.0673341382,3.1959436059,0.3646703164  
 H,0,2.3207966775,3.0969390806,0.5544206629  
 H,0,3.0215844359,3.1964107474,-1.0653830767  
 N,0,0.7468147841,-1.2027818039,0.1870762578  
 O,0,0.7419680947,-0.1834310153,0.6433888391  
 O,0,0.4388144602,-2.2171296846,-0.1787256487  
 F,0,-3.5420724644,1.0300567449,0.7932016532  
 B,0,-4.3410304182,0.2264406419,0.0059425192  
 F,0,-4.960182619,-0.7186799977,0.7970727562  
 F,0,-5.2920386999,0.9997334224,-0.6255031877  
 F,0,-3.5604406448,-0.4078154351,-0.9389304927

**TS NO2BF4 PCM ONIOM 2.611\_94056**

ONIOM(M062X/6-311G\*:PM3)

E(RPM3) = 0.276280398458

Zero-point correction= 0.156771 (Hartree/Particle)  
 Thermal correction to Energy= 0.173463  
 Thermal correction to Enthalpy= 0.174407  
 Thermal correction to Gibbs Free Energy= 0.105258  
 Sum of electronic and ZPE= -476.889047  
 Sum of electronic and thermal Energies= -476.872355  
 Sum of electronic and thermal Enthalpies= -476.871411  
 Sum of electronic and thermal Free Energies= -476.940560

| E             | CV        | S         |
|---------------|-----------|-----------|
| KCal/Mol      | Cal/Mol-K | Cal/Mol-K |
| Total 108.849 | 54.163    | 145.536   |

C,0,-3.3290279452,-1.5307805045,0.1109179366  
 C,0,-2.982488655,-0.8286420044,1.2774981483  
 C,0,-2.9548030649,0.5626025638,1.274172895  
 C,0,-3.2517515046,1.2738220973,0.1119851672  
 C,0,-3.613932981,0.5582178572,-1.0449453384  
 C,0,-3.6695157217,-0.8253226567,-1.0466754257  
 C,0,-3.1822493898,2.7732113941,0.073111299  
 H,0,-3.3699318259,-2.6141156485,0.1233957854  
 H,0,-2.7479811535,-1.3753672985,2.1843378835  
 H,0,-2.6883904254,1.0980587989,2.1786313333  
 H,0,-3.855491916,1.1085382395,-1.9484150347  
 H,0,-3.9581645092,-1.3607136306,-1.9430598035  
 H,0,-3.042489102,3.193381995,1.0685144297  
 H,0,-4.094399018,3.1911624245,-0.3569107881  
 H,0,-2.3483899329,3.0990593793,-0.5545460943  
 N,0,-0.7558730041,-1.196076506,-0.1878797579  
 O,0,-0.75550337,-0.1777439524,-0.6463786961  
 O,0,-0.444127893,-2.2082912874,0.1804683732  
 F,0,4.9888115223,-0.5668055179,0.9356586827  
 B,0,4.3664399762,0.2256925513,-0.0061192261  
 F,0,5.3150634384,0.8757263133,-0.7668816158



F,0,3.5836674784,-0.5642269493,-0.8232907877  
 F,0,3.568896997,1.1541833421,0.6308886345

### TS NO2BF4 PCM ONIOM 2.612\_94115

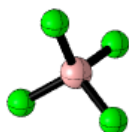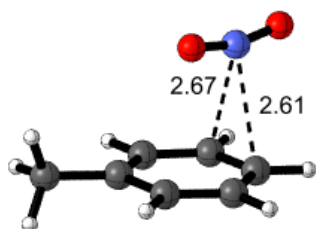

ONIOM(M062X/6-311G\*:PM3)  
 E(RPM3) = 0.276652314278

Zero-point correction= 0.156617 (Hartree/Particle)  
 Thermal correction to Energy= 0.173321  
 Thermal correction to Enthalpy= 0.174265  
 Thermal correction to Gibbs Free Energy= 0.104690  
 Sum of electronic and ZPE= -476.889231  
 Sum of electronic and thermal Energies= -476.872527  
 Sum of electronic and thermal Enthalpies= -476.871583  
 Sum of electronic and thermal Free Energies= -476.941158

| E             | CV        | S         |
|---------------|-----------|-----------|
| KCal/Mol      | Cal/Mol-K | Cal/Mol-K |
| Total 108.761 | 54.240    | 146.433   |

C,0,3.1418573429,-1.6764251096,-0.1081662376  
 C,0,3.4765349531,-0.93414199,-1.2437926861  
 C,0,3.6761454128,0.4316301192,-1.1330827351  
 C,0,3.582661498,1.0870951755,0.1095264695  
 C,0,3.2897424431,0.3317740025,1.2438264442  
 C,0,3.0591833782,-1.03731418,1.140597703  
 C,0,3.7890541861,2.5723331009,0.1886468296  
 H,0,2.9858722967,-2.7471281749,-0.1798575458  
 H,0,3.5633500173,-1.4229373963,-2.2066265805  
 H,0,3.9143567299,1.0140456437,-2.0172183854  
 H,0,3.2256547884,0.8158436477,2.2120069836  
 H,0,2.8267880735,-1.6171314342,2.0272383772  
 H,0,2.9750389555,3.0969529478,-0.3188163622  
 H,0,4.7180151685,2.8603608466,-0.3072769205  
 H,0,3.8249377421,2.917257244,1.2212984227  
 N,0,0.6595530302,-0.8680306126,-0.0142666734  
 O,0,0.7883237896,0.1594232039,-0.434262599  
 O,0,0.209586049,-1.8249010913,0.3598425383  
 F,0,-5.13036512,-0.7037884801,0.76761482  
 B,0,-4.5066046067,0.2391749289,-0.0222856253  
 F,0,-5.45402977,1.0160925799,-0.6547432312

F,0,-3.7061051096,1.0402010708,0.766297609  
 F,0,-3.7270442487,-0.3972010425,-0.9665236153

### TS NO2BF4 PCM ONIOM 2.613\_94064

ONIOM(M062X/6-311G\*:PM3)  
 E(RPM3) = 0.276431719226

Zero-point correction= 0.156537 (Hartree/Particle)  
 Thermal correction to Energy= 0.173222  
 Thermal correction to Enthalpy= 0.174166  
 Thermal correction to Gibbs Free Energy= 0.105269  
 Sum of electronic and ZPE= -476.889376  
 Sum of electronic and thermal Energies= -476.872691  
 Sum of electronic and thermal Enthalpies= -476.871747  
 Sum of electronic and thermal Free Energies= -476.940644

| E             | CV        | S         |
|---------------|-----------|-----------|
| KCal/Mol      | Cal/Mol-K | Cal/Mol-K |
| Total 108.699 | 54.249    | 145.007   |

C,0,3.2075474601,-1.4794373705,0.5093753733  
 C,0,3.8406053965,-0.9263825442,-0.6068713694  
 C,0,3.7939571153,0.4423344726,-0.8111089998  
 C,0,3.1484185883,1.2964345822,0.1028102457  
 C,0,2.5554472671,0.7399803946,1.2351603782  
 C,0,2.5734037352,-0.6370250963,1.4377876942  
 C,0,3.1088966202,2.7750493447,-0.1554458275  
 H,0,3.238018329,-2.5494212882,0.6819221738  
 H,0,4.3496681382,-1.5681664432,-1.3155594877  
 H,0,4.2638578757,0.8728234762,-1.68941124  
 H,0,2.0644795358,1.3832600652,1.956913858  
 H,0,2.1092324719,-1.0624600785,2.3208426915  
 H,0,2.5598435044,2.9884712958,-1.0759538043  
 H,0,4.1190889244,3.1698193104,-0.2826941763  
 H,0,2.6283385073,3.3111673902,0.6621312335  
 N,0,0.7947262402,-1.2669586805,-0.4726651369  
 O,0,0.9199778838,-0.3304075092,-1.068463059  
 O,0,0.3891444682,-2.2203315048,-0.0438823771  
 F,0,-5.2100460273,-0.3964140215,0.7994704299  
 B,0,-4.2641704022,0.2311505713,0.0165443892  
 F,0,-4.8895509495,1.0300480945,-0.9174885275  
 F,0,-3.4490426321,1.0076869634,0.8145121064  
 F,0,-3.4992510506,-0.7181564244,-0.6301275681

### TS NO2BF4 PCM ONIOM 2.613\_94071

ONIOM(M062X/6-311G\*:PM3)  
 E(RPM3) = 0.276821454218

Zero-point correction= 0.156423 (Hartree/Particle)  
 Thermal correction to Energy= 0.173140  
 Thermal correction to Enthalpy= 0.174084  
 Thermal correction to Gibbs Free Energy= 0.105191  
 Sum of electronic and ZPE= -476.889491  
 Sum of electronic and thermal Energies= -476.872774  
 Sum of electronic and thermal Enthalpies= -476.871830  
 Sum of electronic and thermal Free Energies= -476.940723

| E | CV | S |
|---|----|---|
|---|----|---|

KCal/Mol Cal/Mol-K Cal/Mol-K  
Total 108.647 54.310 144.997

C,0,3.0224903345,-1.4263357801,0.7635508635  
C,0,3.8550301339,-0.9749464128,-0.2633723677  
C,0,3.8578583074,0.3679425871,-0.601687913  
C,0,3.0627826395,1.2994864119,0.0923279105  
C,0,2.2658275823,0.8465190361,1.142191704  
C,0,2.2327955965,-0.5056392688,1.4725750561  
C,0,3.0801712193,2.7463679762,-0.3087432271  
H,0,3.0126219705,-2.4747817078,1.040055968  
H,0,4.4816700033,-1.6751251481,-0.8021412307  
H,0,4.486547015,0.7161517913,-1.4146770705  
H,0,1.6556380442,1.5498835791,1.6979545513  
H,0,1.6073290036,-0.8486781569,2.2896445963  
H,0,2.5151111891,3.3614915846,0.3906382766  
H,0,2.6438797503,2.8717747903,-1.3032447731  
H,0,4.1040149503,3.1224806015,-0.3546812017  
N,0,0.82391867,-1.3146699784,-0.6456226419  
O,0,1.0829337801,-0.4590288523,-1.3157535668  
O,0,0.3198220076,-2.2083923599,-0.1930486656  
F,0,-3.3319368184,1.0327271952,0.8168214364  
B,0,-4.1424033843,0.2393501755,0.0307931039  
F,0,-5.0903237922,1.023613844,-0.5917835974  
F,0,-3.372674073,-0.3964201888,-0.9219640871  
F,0,-4.7653561295,-0.7043137187,0.8204098761

### TS NO2BF4 PCM ONIOM 2.615\_93981

ONIOM(M062X/6-311G\*:PM3)  
E(RPM3) = 0.276549001638

Zero-point correction= 0.157000 (Hartree/Particle)  
Thermal correction to Energy= 0.173600  
Thermal correction to Enthalpy= 0.174545  
Thermal correction to Gibbs Free Energy= 0.106270  
Sum of electronic and ZPE= -476.889079  
Sum of electronic and thermal Energies= -476.872479  
Sum of electronic and thermal Enthalpies= -476.871534  
Sum of electronic and thermal Free Energies= -476.939809

E CV S  
KCal/Mol Cal/Mol-K Cal/Mol-K  
Total 108.936 54.169 143.695

C,0,3.1196291982,-1.0808566656,0.8080661191  
C,0,3.7985115228,-0.4226485134,-0.2204279618  
C,0,3.4026591545,0.8498516611,-0.5967407263  
C,0,2.3489746754,1.5137491368,0.0605114995  
C,0,1.7029568685,0.8647695748,1.111529413  
C,0,2.0736508322,-0.4257038764,1.4803448496  
C,0,1.941791196,2.8910005313,-0.3778143084  
H,0,3.4219625001,-2.075619746,1.1152601751  
H,0,4.6189361356,-0.9131240327,-0.7300387553  
H,0,3.9145381098,1.3539158729,-1.4100582988  
H,0,0.8965857839,1.363629141,1.6379740843  
H,0,1.5654742515,-0.9230810774,2.2994573387  
H,0,2.807601422,3.5552922789,-0.4131860066  
H,0,1.2015711975,3.3214271574,0.2957237416  
H,0,1.5143785617,2.8611657411,-1.3834551806  
N,0,1.0219673041,-1.6849087066,-0.6318777582

O,0,1.0275033153,-0.8113089123,-1.3282589771  
O,0,0.7981750005,-2.6756490282,-0.1561079368  
F,0,-2.927252812,-0.4902361943,0.9725884872  
B,0,-3.7106899216,0.147416636,0.0323470408  
F,0,-4.3258879968,-0.7956109265,-0.7646074416  
F,0,-4.6649648154,0.9126932271,0.6684029762  
F,0,-2.9148494839,0.9583627209,-0.7504803736

### TS NO2BF4 PCM ONIOM 2.622\_94034

ONIOM(M062X/6-311G\*:PM3)  
E(RPM3) = 0.276107961845

Zero-point correction= 0.156649 (Hartree/Particle)  
Thermal correction to Energy= 0.173357  
Thermal correction to Enthalpy= 0.174302  
Thermal correction to Gibbs Free Energy= 0.105680  
Sum of electronic and ZPE= -476.889379  
Sum of electronic and thermal Energies= -476.872670  
Sum of electronic and thermal Enthalpies= -476.871726  
Sum of electronic and thermal Free Energies= -476.940348

E CV S  
KCal/Mol Cal/Mol-K Cal/Mol-K  
Total 108.783 54.263 144.427

C,0,3.3948242133,-0.8389460343,0.6037496846  
C,0,3.7721539307,-0.0666775372,-0.4973071118  
C,0,3.1079355413,1.1198846919,-0.7606445035  
C,0,2.0777848345,1.5844757159,0.0785899169  
C,0,1.7346063819,0.8267338107,1.1973900247  
C,0,2.3772500919,-0.3810001995,1.4572450621  
C,0,1.3734327192,2.8710879859,-0.2434363144  
H,0,3.907835837,-1.7686402366,0.8224163757  
H,0,4.5691274989,-0.4031991637,-1.149044871  
H,0,3.3853369834,1.7098321009,-1.6282818991  
H,0,0.9522513046,1.173543422,1.8634870744  
H,0,2.1027057769,-0.9649724716,2.3291172233  
H,0,0.6774999295,3.1545490591,0.5452056759  
H,0,0.8137067586,2.7774017282,-1.1776059465  
H,0,2.094095311,3.6801577302,-0.3782249101  
N,0,1.2120651589,-1.777031207,-0.5071644015  
O,0,1.2381728141,-2.7932986149,-0.0347681514  
O,0,0.9631084816,-0.9062733554,-1.1598973717  
F,0,-4.6528966211,0.6911334075,0.7842058976  
B,0,-3.7002073634,0.0495005246,0.0214102305  
F,0,-2.9064324461,0.9844139664,-0.6102517746  
F,0,-2.9147686012,-0.7413766948,0.83530138  
F,0,-4.3180095353,-0.7416496284,-0.9247892903

### TS NO2BF4 PCM ONIOM 2.629\_93709

ONIOM(M062X/6-311G\*:PM3)  
E(RPM3) = 0.276064279501

Zero-point correction= 0.157132 (Hartree/Particle)  
Thermal correction to Energy= 0.173324  
Thermal correction to Enthalpy= 0.174268  
Thermal correction to Gibbs Free Energy= 0.110282  
Sum of electronic and ZPE= -476.890187

Sum of electronic and thermal Energies= -476.873995  
 Sum of electronic and thermal Enthalpies= -476.873051  
 Sum of electronic and thermal Free Energies= -476.937037

E CV S  
 KCal/Mol Cal/Mol-K Cal/Mol-K  
 Total 108.763 54.005 134.671

C,0,-2.7170462734,-0.2931307136,1.263782627  
 C,0,-1.3163721188,-0.340497541,1.3670979738  
 C,0,-0.5317036628,0.6062740058,0.7137601153  
 C,0,-1.1237923323,1.5997194367,-0.0645095098  
 C,0,-2.5277503934,1.6427183476,-0.1488893955  
 C,0,-3.3189955139,0.7204780963,0.5166900268  
 C,0,-0.2952446922,2.6204416713,-0.7904444944  
 H,0,-3.3235841378,-1.0217112166,1.7895297544  
 H,0,-0.8459819185,-1.1120653305,1.9670876845  
 H,0,0.5531532266,0.5528335885,0.7890910265  
 H,0,-2.9939689007,2.4170263624,-0.7491131178  
 H,0,-4.3983331205,0.7744119775,0.4444080357  
 H,0,-0.3744829626,3.5911683855,-0.2941882526  
 H,0,-0.6449522602,2.7496387761,-1.816178538  
 H,0,0.7573828297,2.336167493,-0.8134878494  
 N,0,-1.9630654861,-1.729572798,-0.8059289005  
 O,0,-1.8408432789,-0.9069040518,-1.5506837675  
 O,0,-2.0689855834,-2.7368849573,-0.3255847113  
 F,0,3.1532528531,0.7755089808,1.0269810754  
 B,0,3.1026883565,-0.2014699505,0.054469445  
 F,0,4.3854656577,-0.5713058083,-0.2926584696  
 F,0,2.4277354348,-1.3034037357,0.5407803481  
 F,0,2.451556277,0.2823699818,-1.0621381061

### TS NO2BF4 PCM ONIOM 2.635\_93808

ONIOM(M062X/6-311G\*:PM3)  
 E(RPM3) = 0.275285670989

Zero-point correction= 0.157062 (Hartree/Particle)  
 Thermal correction to Energy= 0.173401  
 Thermal correction to Enthalpy= 0.174345  
 Thermal correction to Gibbs Free Energy= 0.108630  
 Sum of electronic and ZPE= -476.889651  
 Sum of electronic and thermal Energies= -476.873312  
 Sum of electronic and thermal Enthalpies= -476.872368  
 Sum of electronic and thermal Free Energies= -476.938082

E CV S  
 KCal/Mol Cal/Mol-K Cal/Mol-K  
 Total 108.811 54.069 138.308

C,0,-1.368715425,0.663147184,1.4948294022  
 C,0,-2.765110848,0.6942260621,1.4473503522  
 C,0,-3.4439236979,-0.2140282207,0.6519093833  
 C,0,-2.7562304148,-1.1916017019,-0.0893704684  
 C,0,-1.3648433836,-1.2366447511,-0.0078228458  
 C,0,-0.6704801596,-0.3146936256,0.7699612437  
 C,0,-3.5210641608,-2.1574289553,-0.9483776656  
 H,0,-0.825940152,1.3665601541,2.1162379102  
 H,0,-3.3110081344,1.4342093866,2.0197650272  
 H,0,-4.5271540055,-0.1793620431,0.5992941311  
 H,0,-0.8171913522,-1.9917697755,-0.5609707996

H,0,0.4151440785,-0.3581138695,0.823231277  
 H,0,-4.0171823936,-1.631651269,-1.7681181132  
 H,0,-4.2985913736,-2.6575619327,-0.3675714794  
 H,0,-2.8663557281,-2.9160867434,-1.3756685536  
 N,0,-1.0708340577,1.8293555623,-0.8501019731  
 O,0,-0.1976994675,2.4632723305,-0.5533856607  
 O,0,-1.9367653842,1.3738866243,-1.3860390643  
 F,0,2.8100212727,0.4685828514,0.937681276  
 B,0,3.4187055443,-0.3436897351,0.0031481093  
 F,0,4.2003192678,-1.2811119331,0.6447433902  
 F,0,2.4567070139,-0.9832214934,-0.7516714197  
 F,0,4.2074949614,0.428416894,-0.824636459

### TS NO2BF4 PCM ONIOM 2.677\_94011

ONIOM(M062X/6-311G\*:PM3)  
 E(RPM3) = 0.277990728277

Zero-point correction= 0.157761 (Hartree/Particle)  
 Thermal correction to Energy= 0.173818  
 Thermal correction to Enthalpy= 0.174763  
 Thermal correction to Gibbs Free Energy= 0.111701  
 Sum of electronic and ZPE= -476.894037  
 Sum of electronic and thermal Energies= -476.877980  
 Sum of electronic and thermal Enthalpies= -476.877036  
 Sum of electronic and thermal Free Energies= -476.940097

E CV S  
 KCal/Mol Cal/Mol-K Cal/Mol-K  
 Total 109.073 53.859 132.724

C,0,-1.0167931141,0.6546539756,1.52626604  
 C,0,-2.2990088058,1.0955655399,1.1690867471  
 C,0,-3.1170585723,0.2913891123,0.3855843569  
 C,0,-2.6766441813,-0.9592999878,-0.0591211476  
 C,0,-1.3973484339,-1.3933992,0.3152810796  
 C,0,-0.5750966505,-0.6028718646,1.1071760951  
 C,0,-3.5430288791,-1.8106946082,-0.9437312266  
 H,0,-0.3811942374,1.2760124438,2.1475500179  
 H,0,-2.6542185414,2.0591747718,1.5157718749  
 H,0,-4.1081653425,0.6364115615,0.1125184195  
 H,0,-1.0453509355,-2.361810367,-0.0238930574  
 H,0,0.4224270008,-0.9448522609,1.370964448  
 H,0,-3.3321439386,-1.5997566066,-1.9962107429  
 H,0,-4.6009209354,-1.6119900618,-0.7715251193  
 H,0,-3.3547284525,-2.8715408394,-0.7768710517  
 N,0,-0.408345002,1.6853649948,-0.8696071573  
 O,0,0.0884334374,2.5856723793,-0.4331813499  
 O,0,-0.8312157186,0.887663773,-1.5200562673  
 F,0,2.4643425372,-1.7621210008,-0.1613232214  
 B,0,2.8234332436,-0.4402276232,-0.0176409319  
 F,0,2.9676520273,-0.1341389008,1.3177089518  
 F,0,4.0078924533,-0.2078779038,-0.6812561056  
 F,0,1.8363940412,0.3665336728,-0.5652726519

### TS NO2BF4 PCM ONIOM 2.682\_93941

ONIOM(M062X/6-311G\*:PM3)  
 E(RPM3) = 0.277735092828

Zero-point correction= 0.158019 (Hartree/Particle)  
 Thermal correction to Energy= 0.173952  
 Thermal correction to Enthalpy= 0.174897  
 Thermal correction to Gibbs Free Energy= 0.112396  
 Sum of electronic and ZPE= -476.893796  
 Sum of electronic and thermal Energies= -476.877863  
 Sum of electronic and thermal Enthalpies= -476.876919  
 Sum of electronic and thermal Free Energies= -476.939419

E CV S  
 KCal/Mol Cal/Mol-K Cal/Mol-K  
 Total 109.157 53.774 131.543

C,0,-1.0207411657,0.6534675118,1.5263236065  
 C,0,-2.2994375449,1.0973039372,1.1654703933  
 C,0,-3.117590623,0.2953410304,0.3770750003  
 C,0,-2.6788048175,-0.9542082167,-0.0673439985  
 C,0,-1.3997246597,-1.3911406695,0.3095809906  
 C,0,-0.579285103,-0.6046811057,1.1052253285  
 C,0,-3.5440513631,-1.8218325778,-0.9372420806  
 H,0,-0.3853208824,1.2728916106,2.1497339728  
 H,0,-2.6537458569,2.0616602361,1.5110485606  
 H,0,-4.1063061267,0.6437191132,0.1006015769  
 H,0,-1.0483100067,-2.3587783708,-0.0332194102  
 H,0,0.4177655663,-0.9476179631,1.3695793122  
 H,0,-4.5305260858,-1.3830793431,-1.0834829269  
 H,0,-3.6682801604,-2.8108144532,-0.4913803389  
 H,0,-3.0834922845,-1.9645120946,-1.9179770629  
 N,0,-0.4032232657,1.6936065265,-0.8701806119  
 O,0,0.0906409865,2.592535309,-0.4281434221  
 O,0,-0.8223463573,0.8953343874,-1.5219544042  
 F,0,4.0091640572,-0.211715705,-0.6754599702  
 B,0,2.8224784046,-0.4421480664,-0.0151514308  
 F,0,2.4577728085,-1.7616615465,-0.1664147733  
 F,0,2.9657560083,-0.1437782211,1.3220459733  
 F,0,1.8400964721,0.3719026714,-0.5603382845

### TS NO2BF4 PCM ONIOM 2.684\_93988

ONIOM(M062X/6-311G\*:PM3)  
 E(RPM3) = 0.277678376338

Zero-point correction= 0.157775 (Hartree/Particle)  
 Thermal correction to Energy= 0.173751  
 Thermal correction to Enthalpy= 0.174696  
 Thermal correction to Gibbs Free Energy= 0.111918  
 Sum of electronic and ZPE= -476.894012  
 Sum of electronic and thermal Energies= -476.878036  
 Sum of electronic and thermal Enthalpies= -476.877092  
 Sum of electronic and thermal Free Energies= -476.939870

E CV S  
 KCal/Mol Cal/Mol-K Cal/Mol-K  
 Total 109.031 53.837 132.127

C,0,-1.0149183164,0.6485224514,1.5297841378  
 C,0,-2.2944213392,1.094042334,1.1724346355  
 C,0,-3.1149385925,0.2938705021,0.3855385963  
 C,0,-2.6781717096,-0.9559204435,-0.0618921704  
 C,0,-1.3998088571,-1.3950904181,0.3127645785  
 C,0,-0.5762896707,-0.6095674403,1.1071728457

C,0,-3.5425641648,-1.8097925219,-0.9460411757  
 H,0,-0.3775723186,1.2666285275,2.1525242999  
 H,0,-2.6472572039,2.0580184107,1.5205826672  
 H,0,-4.104436673,0.643068586,0.1125816311  
 H,0,-1.0506451487,-2.3635641831,-0.0297675655  
 H,0,0.4204241034,-0.9545317226,1.3701481197  
 H,0,-3.5062986754,-2.8550430398,-0.6353981227  
 H,0,-3.1901909069,-1.7647239458,-1.9802922249  
 H,0,-4.5801883673,-1.4775282543,-0.9298705636  
 N,0,-0.4075657098,1.6882032406,-0.873354704  
 O,0,0.0854516011,2.5883823289,-0.4333203468  
 O,0,-0.8280881043,0.8876088521,-1.5211790391  
 F,0,1.8359087115,0.368621953,-0.5644665109  
 B,0,2.8222728194,-0.4385707053,-0.0162447601  
 F,0,2.4638958027,-1.7604313923,-0.162030013  
 F,0,4.0077098316,-0.2051368112,-0.6777531851  
 F,0,2.9643388885,-0.1339953082,1.31967987

### TS NO2BF4 PCM ONIOM 2.693\_94047

ONIOM(M062X/6-311G\*:PM3)  
 E(RPM3) = 0.278733764858

Zero-point correction= 0.157605 (Hartree/Particle)  
 Thermal correction to Energy= 0.173752  
 Thermal correction to Enthalpy= 0.174697  
 Thermal correction to Gibbs Free Energy= 0.110995  
 Sum of electronic and ZPE= -476.893866  
 Sum of electronic and thermal Energies= -476.877718  
 Sum of electronic and thermal Enthalpies= -476.876774  
 Sum of electronic and thermal Free Energies= -476.940476

E CV S  
 KCal/Mol Cal/Mol-K Cal/Mol-K  
 Total 109.031 53.909 134.071

C,0,-1.9710484295,-1.1388058593,-1.2792846128  
 C,0,-3.1092259835,-0.7678585052,-0.5612491217  
 C,0,-3.1486081812,0.4616202217,0.0795415164  
 C,0,-2.0688343092,1.3564459554,0.0061755954  
 C,0,-0.9478050077,0.9894850043,-0.7403880898  
 C,0,-0.8917428627,-0.2479391618,-1.374923141  
 C,0,-2.1209628474,2.6672139285,0.7386932447  
 H,0,-1.9308322235,-2.0964383566,-1.7857098687  
 H,0,-3.9545498644,-1.4421040755,-0.4986009583  
 H,0,-4.0276472368,0.7422789257,0.6500516451  
 H,0,-0.0955227686,1.6598748122,-0.8035738181  
 H,0,-0.0057241961,-0.5256650632,-1.9369433534  
 H,0,-1.3784764944,3.3668556811,0.3556763072  
 H,0,-1.9222663533,2.5150758191,1.803258911  
 H,0,-3.1078240187,3.1242039094,0.652305364  
 N,0,-0.5299459837,-1.6993452272,0.9264021151  
 O,0,-0.9406385848,-0.9067382833,1.5918059868  
 O,0,-0.0243222606,-2.5923275535,0.4834354033  
 F,0,1.632626258,-0.3080600916,0.4256453401  
 B,0,2.7692503742,0.3130130217,-0.0702201201  
 F,0,3.2144796789,-0.3814783983,-1.1736185876  
 F,0,2.4728009674,1.6109391124,-0.422367258  
 F,0,3.7419973274,0.3077401841,0.9057085004

**TS NO2BF4 PCM ONIOM 2.701\_94088**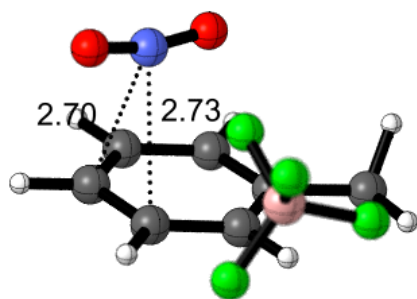

ONIOM(M062X/6-311G\*:PM3)  
E(RPM3) = 0.278953217307

Zero-point correction= 0.157420 (Hartree/Particle)  
Thermal correction to Energy= 0.173557  
Thermal correction to Enthalpy= 0.174501  
Thermal correction to Gibbs Free Energy= 0.110945  
Sum of electronic and ZPE= -476.894402  
Sum of electronic and thermal Energies= -476.878265  
Sum of electronic and thermal Enthalpies= -476.877321  
Sum of electronic and thermal Free Energies= -476.940877

| E             | CV        | S         |
|---------------|-----------|-----------|
| KCal/Mol      | Cal/Mol-K | Cal/Mol-K |
| Total 108.909 | 53.925    | 133.764   |

C,0,1.9765542662,-1.0795331913,1.2912844969  
C,0,3.0913080629,-0.6243938626,0.5854724117  
C,0,3.0405650283,0.5963925347,-0.0703197674  
C,0,1.8901834759,1.402719156,-0.0250441598  
C,0,0.7907174647,0.9514768017,0.7041431096  
C,0,0.8260611657,-0.2797700687,1.3544350618  
C,0,1.8632781214,2.7182666793,-0.7502434448  
H,0,2.0061095431,-2.0318374001,1.8080714397  
H,0,3.9893211564,-1.2284939134,0.5425322621  
H,0,3.9026233158,0.9400344144,-0.6326083896  
H,0,-0.1210671873,1.5426124855,0.7390806288  
H,0,-0.0486638354,-0.6208284268,1.9010953363  
H,0,2.6391965208,3.3831178385,-0.3643454733  
H,0,0.9001434398,3.2150698863,-0.6378957523  
H,0,2.0567570382,2.577105315,-1.8159137816  
N,0,0.5794721697,-1.762734616,-0.9185829284  
O,0,0.9777948632,-0.9749079694,-1.5971888283  
O,0,0.0986779013,-2.6637438864,-0.4640688699  
F,0,-2.5057061004,0.2193259369,1.4408649788  
B,0,-2.6579664105,0.2875306978,0.0734703039  
F,0,-2.5456307729,1.5937726518,-0.3490189358  
F,0,-1.6750884126,-0.4780040949,-0.537532773  
F,0,-3.8928848142,-0.2106219683,-0.2795919255

**TS NO2BF4 PCM ONIOM 2.704\_94050**

ONIOM(M062X/6-311G\*:PM3)  
E(RPM3) = 0.278838719430

Zero-point correction= 0.157559 (Hartree/Particle)  
Thermal correction to Energy= 0.173652  
Thermal correction to Enthalpy= 0.174597

Thermal correction to Gibbs Free Energy= 0.111322  
Sum of electronic and ZPE= -476.894264  
Sum of electronic and thermal Energies= -476.878170  
Sum of electronic and thermal Enthalpies= -476.877226  
Sum of electronic and thermal Free Energies= -476.940501

| E             | CV        | S         |
|---------------|-----------|-----------|
| KCal/Mol      | Cal/Mol-K | Cal/Mol-K |
| Total 108.969 | 53.894    | 133.174   |

C,0,1.9715952026,-1.0799432063,-1.2941516224  
C,0,0.8229693975,-0.2773893443,-1.3561354884  
C,0,0.7915618952,0.9540926975,-0.7064387747  
C,0,1.8932394482,1.4030311879,0.0212537759  
C,0,3.0416054174,0.594147815,0.0650867954  
C,0,3.0883277884,-0.6272858636,-0.5900710785  
C,0,1.8651580401,2.7132307959,0.7561970318  
H,0,1.9985481718,-2.0320030507,-1.8115216483  
H,0,-0.0528564376,-0.6161938028,-1.9024086211  
H,0,-0.1183115953,1.5481562199,-0.7414009548  
H,0,3.9059405518,0.9365139214,0.6245620208  
H,0,3.9854395915,-1.2328732011,-0.5492166902  
H,0,1.8869622149,2.5482353827,1.8363951944  
H,0,0.9686034973,3.2844495215,0.5172825847  
H,0,2.7382705583,3.3170470902,0.5017316922  
N,0,0.5806384726,-1.7596743155,0.9228404845  
O,0,0.9788379699,-0.9684788417,1.5973835391  
O,0,0.1010570164,-2.6621227139,0.4703235097  
F,0,-1.6736620529,-0.4775328617,0.5364412099  
B,0,-2.6579110368,0.2868604786,-0.0737736271  
F,0,-2.5459789371,1.5933942414,0.3478953663  
F,0,-2.5075163205,0.2182343619,-1.4413443418  
F,0,-3.8919528537,-0.2121695124,0.2811446426

**TS NO2BF4 PCM ONIOM 2.707\_94118 (6b<sup>‡</sup>)**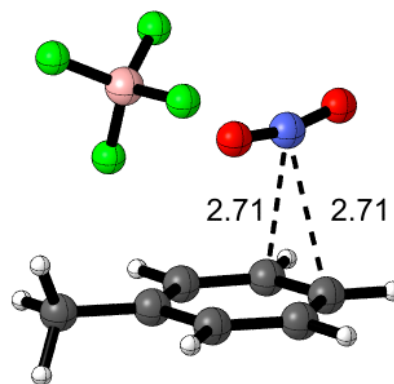

ONIOM(M062X/6-311G\*:PM3)  
E(RPM3) = 0.279306447119

Zero-point correction= 0.157378 (Hartree/Particle)  
Thermal correction to Energy= 0.173583  
Thermal correction to Enthalpy= 0.174528  
Thermal correction to Gibbs Free Energy= 0.110257  
Sum of electronic and ZPE= -476.894062  
Sum of electronic and thermal Energies= -476.877857  
Sum of electronic and thermal Enthalpies= -476.876912  
Sum of electronic and thermal Free Energies= -476.941183

E CV S  
KCal/Mol Cal/Mol-K Cal/Mol-K  
Total 108.925 54.011 135.269

C,0,2.3215255531,-1.0762211587,1.1383689184  
C,0,3.270536233,-0.5009921066,0.2930659736  
C,0,3.02550623,0.7417530586,-0.2725311943  
C,0,1.8456986966,1.4524578568,0.0066482872  
C,0,0.9168480258,0.8833693305,0.8768664558  
C,0,1.1432523001,-0.3739016818,1.4333679999  
C,0,1.6019405633,2.7902196422,-0.6328861843  
H,0,2.5007259598,-2.0473157729,1.5854871041  
H,0,4.1892151072,-1.0289619709,0.0688546777  
H,0,3.7559535961,1.1782534454,-0.9457960294  
H,0,-0.0103779224,1.4045641726,1.0974265787  
H,0,0.4027608163,-0.8093525217,2.0960194833  
H,0,2.4276919562,3.4734350406,-0.4243457612  
H,0,0.6800288602,3.2426982856,-0.2690482559  
H,0,1.5290206364,2.6899341734,-1.7186168035  
N,0,0.6044614291,-1.7295835898,-0.8495629621  
O,0,0.8948576018,-0.9166578677,-1.5533535414  
O,0,0.2023369755,-2.6541150058,-0.3657284551  
F,0,-2.5797991112,0.9922755677,1.1987205634  
B,0,-2.7654216009,0.2255606728,0.0696923816  
F,0,-3.8118480238,-0.6477883708,0.2697760571  
F,0,-3.0388137881,1.0400672759,-1.0073135994  
F,0,-1.6147580941,-0.5019934753,-0.1941886943

### TS NO2BF4 PCM ONIOM 2.712\_94072

ONIOM(M062X/6-311G\*:PM3)  
E(RPM3) = 0.278797036640

Zero-point correction= 0.157425 (Hartree/Particle)  
Thermal correction to Energy= 0.173604  
Thermal correction to Enthalpy= 0.174548  
Thermal correction to Gibbs Free Energy= 0.110732  
Sum of electronic and ZPE= -476.894027  
Sum of electronic and thermal Energies= -476.877848  
Sum of electronic and thermal Enthalpies= -476.876903  
Sum of electronic and thermal Free Energies= -476.940720

E CV S  
KCal/Mol Cal/Mol-K Cal/Mol-K  
Total 108.938 54.006 134.313

C,0,2.3119519558,-1.0678310163,1.1438175581  
C,0,3.2595746539,-0.4955513001,0.2946029718  
C,0,3.0137744648,0.7452071681,-0.2750341343  
C,0,1.8340765867,1.4560464413,0.0029561804  
C,0,0.9058595774,0.8889566528,0.8754882816  
C,0,1.1339407858,-0.3653769983,1.437618523  
C,0,1.5894094139,2.7921754403,-0.6397962513  
H,0,2.4923478007,-2.0373372449,1.5939597731  
H,0,4.1780695789,-1.0242134344,0.0710904125  
H,0,3.743472686,1.1796570861,-0.9504489327  
H,0,-0.0214957061,1.4103700631,1.0949319694  
H,0,0.3938313763,-0.7990118418,2.1019190504  
H,0,0.6678055408,3.2454375343,-0.2761421307  
H,0,1.515540271,2.6894497892,-1.7252318993

H,0,2.415203635,3.4760541964,-0.4335486222  
N,0,0.6033066316,-1.7392391212,-0.8517826992  
O,0,0.878079132,-0.9151886295,-1.5481504066  
O,0,0.2208354099,-2.6711890063,-0.3675434193  
F,0,-3.8458304912,-0.5965395241,0.2368745085  
B,0,-2.7518393751,0.2240322034,0.0704776734  
F,0,-2.5887958203,1.0111160547,1.1889303439  
F,0,-1.6239478751,-0.5606739833,-0.1171657801  
F,0,-2.9328202325,1.0212974705,-1.0385899706

### TS NO2BF4 PCM ONIOM 2.742\_94075

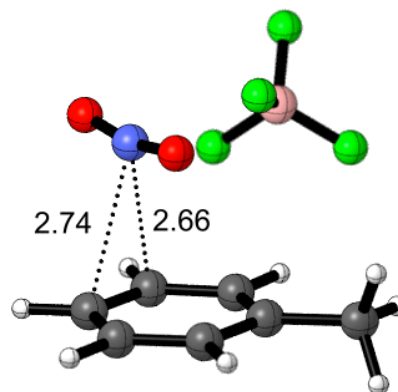

ONIOM(M062X/6-311G\*:PM3)  
E(RPM3) = 0.281649295723

Zero-point correction= 0.157282 (Hartree/Particle)  
Thermal correction to Energy= 0.173358  
Thermal correction to Enthalpy= 0.174302  
Thermal correction to Gibbs Free Energy= 0.111129  
Sum of electronic and ZPE= -476.894598  
Sum of electronic and thermal Energies= -476.878522  
Sum of electronic and thermal Enthalpies= -476.877578  
Sum of electronic and thermal Free Energies= -476.940751

E CV S  
KCal/Mol Cal/Mol-K Cal/Mol-K  
Total 108.784 53.994 132.960

C,0,-2.1758758775,-1.1605793379,1.1659709875  
C,0,-1.0036682114,-0.4225299404,1.3900926485  
C,0,-0.8454798091,0.8435373145,0.8243591998  
C,0,-1.8385385901,1.384336082,0.0111163724  
C,0,-3.0089259289,0.6364570947,-0.2001872126  
C,0,-3.1849938244,-0.6146508683,0.3763634323  
C,0,-1.6752957276,2.7267264907,-0.6444584712  
H,0,-2.2985541947,-2.1361610845,1.6219081051  
H,0,-0.211501113,-0.8342483285,2.0086050299  
H,0,0.0819794638,1.3865097724,0.9896497199  
H,0,-3.7891397156,1.04995284,-0.8306392372  
H,0,-4.0990257105,-1.1683914424,0.2013396595  
H,0,-1.6456284619,2.6213676374,-1.7317241379  
H,0,-0.7573414661,3.2178462159,-0.3236922597  
H,0,-2.5181584396,3.3774968311,-0.4036317123  
N,0,-0.4320162787,-1.6586770531,-0.8911414942  
O,0,-0.9201033941,-0.9533677078,-1.6030754113  
O,0,0.160840161,-2.4826399997,-0.4198615699  
F,0,1.6785127479,-0.0832303557,-0.8760443011

B,0,2.6101072289,0.2807360038,0.0856367947  
 F,0,3.8635838047,-0.1078006484,-0.3304456661  
 F,0,2.5797682523,1.6446201609,0.2695127468  
 F,0,2.2866250845,-0.3641566768,1.2604547769

### TS NO2BF4 PCM ONIOM 2.776\_93985

ONIOM(M062X/6-311G\*:PM3)  
 E(RPM3) = 0.281369632739

Zero-point correction= 0.157929 (Hartree/Particle)  
 Thermal correction to Energy= 0.173892  
 Thermal correction to Enthalpy= 0.174836  
 Thermal correction to Gibbs Free Energy= 0.112232  
 Sum of electronic and ZPE= -476.894156  
 Sum of electronic and thermal Energies= -476.878194  
 Sum of electronic and thermal Enthalpies= -476.877249  
 Sum of electronic and thermal Free Energies= -476.939853

|       | E        | CV        | S         |
|-------|----------|-----------|-----------|
|       | KCal/Mol | Cal/Mol-K | Cal/Mol-K |
| Total | 109.119  | 53.794    | 131.760   |

C,0,-2.1592162888,-1.2691328579,1.0968431457  
 C,0,-1.0647400636,-0.4548409042,1.4254238728  
 C,0,-0.9600667674,0.8339133152,0.90252836  
 C,0,-1.931724389,1.3270626062,0.0323801525  
 C,0,-3.0262369922,0.505289644,-0.2793599879  
 C,0,-3.1472747848,-0.7739488307,0.2504821682  
 C,0,-1.8022711025,2.6893226631,-0.5891385618  
 H,0,-2.2425900724,-2.2634510131,1.519587532  
 H,0,-0.2929961084,-0.8277041222,2.092210775  
 H,0,-0.0936751127,1.441126681,1.1512616263  
 H,0,-3.7915001786,0.8808657368,-0.9504644224  
 H,0,-4.0042341865,-1.3860200902,-0.0026815437  
 H,0,-2.7752052678,3.17325231,-0.6815672184  
 H,0,-1.3792871148,2.6079344008,-1.5944806738  
 H,0,-1.1465436485,3.3320372856,-0.0021235174  
 N,0,-0.2353581887,-1.5673033644,-0.8832901832  
 O,0,-0.750379684,-0.8741413085,-1.5866986848  
 O,0,0.3882131071,-2.356687437,-0.397231002  
 F,0,2.0839242704,-0.5744424092,1.0235325738  
 B,0,2.5690190161,0.3206601807,0.0904948053  
 F,0,2.4754403533,1.6057498744,0.572404079  
 F,0,3.876349794,0.0220457672,-0.2152541088  
 F,0,1.7837514099,0.1811148724,-1.0434231863

### TS NO2BF4 PCM ONIOM 2.967\_93897

ONIOM(M062X/6-311G\*:PM3)  
 E(RPM3) = 0.286733098719

Zero-point correction= 0.157529 (Hartree/Particle)  
 Thermal correction to Energy= 0.173441  
 Thermal correction to Enthalpy= 0.174385  
 Thermal correction to Gibbs Free Energy= 0.112496  
 Sum of electronic and ZPE= -476.893942  
 Sum of electronic and thermal Energies= -476.878030  
 Sum of electronic and thermal Enthalpies= -476.877086  
 Sum of electronic and thermal Free Energies= -476.938974

|       | E        | CV        | S         |
|-------|----------|-----------|-----------|
|       | KCal/Mol | Cal/Mol-K | Cal/Mol-K |
| Total | 108.836  | 53.968    | 130.255   |

C,0,0.5150953323,1.3864896702,0.5293945678  
 C,0,0.9150109798,0.3146227384,1.3312595361  
 C,0,2.1716666343,-0.2921581852,1.1422732745  
 C,0,3.0321170754,0.1514104175,0.1417984112  
 C,0,2.6001162069,1.2043081384,-0.6721943744  
 C,0,1.3609377491,1.8197301208,-0.4823093835  
 C,0,4.3803656685,-0.4783994172,-0.0768821301  
 H,0,-0.461218166,1.8382681677,0.6749470812  
 H,0,0.2584363433,-0.0442841529,2.1179149498  
 H,0,2.4708265221,-1.107663799,1.7921439811  
 H,0,3.2474870895,1.5525823865,-1.4703359001  
 H,0,1.0606404219,2.6324605526,-1.1321854404  
 H,0,5.1723197943,0.2623806827,0.0491047078  
 H,0,4.4638432378,-0.8769383567,-1.090056717  
 H,0,4.5581142136,-1.2898977019,0.6279722  
 N,0,0.2567097919,-1.3998875899,-0.4586812227  
 O,0,0.6532860251,-0.929133621,-1.3933778436  
 O,0,-0.2547338205,-2.1184359992,0.2360694752  
 F,0,-2.0450437022,-0.1703730071,-1.1002249315  
 B,0,-2.8339244033,0.1696770229,-0.0120586857  
 F,0,-4.0556286177,-0.4539421713,-0.1130910553  
 F,0,-2.1696181306,-0.2732395659,1.1154112349  
 F,0,-3.0003012455,1.5340456693,0.0400682647

### TS NO2BF4 PCM ONIOM 2.998\_94196 (6a<sup>‡</sup>)

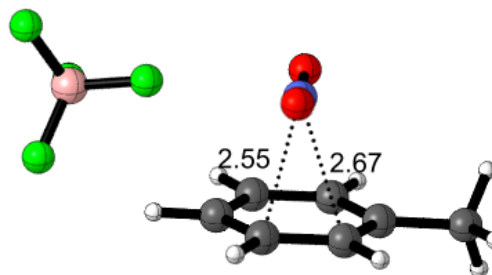

ONIOM(M062X/6-311G\*:PM3)  
 E(RPM3) = 0.285542011062

Zero-point correction= 0.157344 (Hartree/Particle)  
 Thermal correction to Energy= 0.173485  
 Thermal correction to Enthalpy= 0.174429  
 Thermal correction to Gibbs Free Energy= 0.109301  
 Sum of electronic and ZPE= -476.893257  
 Sum of electronic and thermal Energies= -476.877116  
 Sum of electronic and thermal Enthalpies= -476.876172  
 Sum of electronic and thermal Free Energies= -476.941300

|       | E        | CV        | S         |
|-------|----------|-----------|-----------|
|       | KCal/Mol | Cal/Mol-K | Cal/Mol-K |
| Total | 108.863  | 53.951    | 137.074   |

C,0,0.3947296521,-1.1883715728,0.6862498997  
 C,0,1.1040211645,-1.7910502132,-0.3440539161  
 C,0,2.4065960889,-1.3801134014,-0.6409877201  
 C,0,3.0368291717,-0.3627020573,0.0798424992

C,0,2.3083297344,0.2610990745,1.0920428013  
 C,0,0.99212223037,-0.144354218,1.3929849978  
 C,0,4.4496317367,0.0439271191,-0.2376442475  
 H,0,-0.6259904464,-1.4859349479,0.9081100116  
 H,0,0.6470993888,-2.5814317025,-0.9272966141  
 H,0,2.9423011255,-1.8646935455,-1.4507270029  
 H,0,2.7618781328,1.0591778526,1.6710342903  
 H,0,0.4544898883,0.3482034576,2.1960341571  
 H,0,5.1382466032,-0.7757707321,-0.0227544029  
 H,0,4.7565250617,0.907269529,0.3522041183  
 H,0,4.5565695618,0.2924298118,-1.2952358331  
 N,0,0.5713564188,1.5858066627,-0.4372626633  
 O,0,0.716085983,0.9861807251,-1.371218658  
 O,0,0.3088265442,2.4378858596,0.2468897907  
 F,0,-3.0694977601,-0.5760204515,1.2779384867  
 B,0,-2.954745117,-0.1764248109,-0.0352918729  
 F,0,-2.7376305123,-1.2724252236,-0.8412449412  
 F,0,-4.1072111267,0.4663268963,-0.4304621832  
 F,0,-1.8864165977,0.6999918882,-0.1584209976

### TS NO2BF4 PCM ONIOM 3.076\_93756

ONIOM(M062X/6-311G\*:PM3)  
 E(RPM3) = 0.285711715731

Zero-point correction= 0.158386 (Hartree/Particle)  
 Thermal correction to Energy= 0.173688  
 Thermal correction to Enthalpy= 0.174633  
 Thermal correction to Gibbs Free Energy= 0.114875  
 Sum of electronic and ZPE= -476.894053  
 Sum of electronic and thermal Energies= -476.878750  
 Sum of electronic and thermal Enthalpies= -476.877806  
 Sum of electronic and thermal Free Energies= -476.937563

| E             | CV        | S         |
|---------------|-----------|-----------|
| KCal/Mol      | Cal/Mol-K | Cal/Mol-K |
| Total 108.991 | 53.385    | 125.770   |

C,0,-3.2547581362,-0.6243801209,0.3870708919  
 C,0,-2.1705069763,-0.6130023114,1.2651373096  
 C,0,-1.183492014,0.3822556807,1.1604210931  
 C,0,-1.2618157108,1.379338248,0.1803338293  
 C,0,-2.3346118501,1.3290216903,-0.7074760857  
 C,0,-3.3218475058,0.3405602225,-0.6064224011  
 C,0,-0.2109138543,2.4496910932,0.1007971388  
 H,0,-4.0214984837,-1.3833562729,0.4753522742  
 H,0,-2.0933817816,-1.3599635944,2.0474379093  
 H,0,-0.3502279043,0.3837170879,1.8592900893  
 H,0,-2.4110520295,2.0741178498,-1.4918926883  
 H,0,-4.1435904222,0.3364673427,-1.31225482  
 H,0,-0.2289312769,3.0655663939,1.0023267477  
 H,0,-0.3731445985,3.1010088961,-0.7567849371  
 H,0,0.807218023,2.0169905486,0.0233614652  
 N,0,-0.4656414518,-1.6250596029,-0.4423968186  
 O,0,-0.8558205681,-1.1824418475,-1.3919697122  
 O,0,0.0730068675,-2.2825523226,0.2892455239  
 F,0,1.9891051138,-0.4175918161,1.1360055462  
 B,0,2.5716178752,0.0796740249,-0.0125017901  
 F,0,2.5123649356,1.4572321756,-0.0067490859  
 F,0,3.8752202029,-0.3446573073,-0.1082981308  
 F,0,1.8351885461,-0.406081058,-1.0813093488

### TS NO2BF4 PCM ONIOM 3.092\_93919

ONIOM(M062X/6-311G\*:PM3)  
 E(RPM3) = 0.284342827126

Zero-point correction= 0.157445 (Hartree/Particle)  
 Thermal correction to Energy= 0.173463  
 Thermal correction to Enthalpy= 0.174407  
 Thermal correction to Gibbs Free Energy= 0.111649  
 Sum of electronic and ZPE= -476.893404  
 Sum of electronic and thermal Energies= -476.877387  
 Sum of electronic and thermal Enthalpies= -476.876442  
 Sum of electronic and thermal Free Energies= -476.939200

| E             | CV        | S         |
|---------------|-----------|-----------|
| KCal/Mol      | Cal/Mol-K | Cal/Mol-K |
| Total 108.849 | 53.908    | 132.084   |

C,0,-0.3795939688,-1.4128422029,0.286873647  
 C,0,-0.7152745902,-0.3940532377,1.1745072438  
 C,0,-2.0064182075,0.1686041654,1.1561314904  
 C,0,-2.9764871084,-0.2854556067,0.2575536827  
 C,0,-2.610720037,-1.2867892962,-0.6409069363  
 C,0,-1.3287022079,-1.8443143649,-0.6313826168  
 C,0,-4.3561222921,0.3133778652,0.2299328849  
 H,0,0.6239628991,-1.8269392216,0.2929014336  
 H,0,0.0236483572,-0.0305342689,1.8827228224  
 H,0,-2.25697092,0.9482536844,1.8686563984  
 H,0,-3.3383645882,-1.6435330999,-1.362189019  
 H,0,-1.0792811721,-2.6192711861,-1.3462091543  
 H,0,-5.1123812431,-0.4595754217,0.0897150093  
 H,0,-4.4520186253,1.0201508931,-0.598338607  
 H,0,-4.5749722658,0.8468561712,1.154456599  
 N,0,-0.5800444188,1.5573616385,-0.5512308751  
 O,0,-0.8265071674,0.9985121712,-1.4875727226  
 O,0,-0.2381864625,2.3606992115,0.1541117855  
 F,0,2.6634010048,-0.3570590805,1.3798020907  
 B,0,2.9065303573,-0.1415516925,0.0409134836  
 F,0,3.037714,-1.3455968099,-0.6152553628  
 F,0,1.8455491821,0.5660898923,-0.5055932651  
 F,0,4.0590884745,0.5975667968,-0.1095530123

### TS NO2BF4 PCM ONIOM 3.093\_93956

ONIOM(M062X/6-311G\*:PM3)  
 E(RPM3) = 0.284309011817

Zero-point correction= 0.157296 (Hartree/Particle)  
 Thermal correction to Energy= 0.173338  
 Thermal correction to Enthalpy= 0.174282  
 Thermal correction to Gibbs Free Energy= 0.111305  
 Sum of electronic and ZPE= -476.893601  
 Sum of electronic and thermal Energies= -476.877560  
 Sum of electronic and thermal Enthalpies= -476.876616  
 Sum of electronic and thermal Free Energies= -476.939593

| E             | CV        | S         |
|---------------|-----------|-----------|
| KCal/Mol      | Cal/Mol-K | Cal/Mol-K |
| Total 108.771 | 53.938    | 132.546   |



C,0,-0.3832312917,-1.4105449184,0.2744952036  
 C,0,-0.7133255809,-0.3904961179,1.1627920811  
 C,0,-2.0012939002,0.1786873449,1.1449605429  
 C,0,-2.9764551172,-0.2737788828,0.2501982099  
 C,0,-2.6142390738,-1.271608824,-0.653117491  
 C,0,-1.3341408289,-1.8344503537,-0.6452025729  
 C,0,-4.3704610904,0.2901643285,0.2683835113  
 H,0,0.6193531522,-1.8270278056,0.2772592881  
 H,0,0.0291661311,-0.0269229174,1.8673326189  
 H,0,-2.2458815012,0.9633770474,1.8540607132  
 H,0,-3.3413221987,-1.6203657171,-1.378764421  
 H,0,-1.0868702215,-2.6051440893,-1.3654056931  
 H,0,-5.0281704068,-0.3565670774,0.8540934602  
 H,0,-4.7834977232,0.3558582171,-0.7386348114  
 H,0,-4.3936948923,1.2818451073,0.7204896141  
 N,0,-0.5751533764,1.5615209707,-0.5631707861  
 O,0,-0.8130065843,1.0000538006,-1.500150192  
 O,0,-0.238558675,2.3674095238,0.1420195206  
 F,0,2.6586765388,-0.3710460261,1.3858832886  
 B,0,2.9075173277,-0.1465133455,0.0495287922  
 F,0,3.040921174,-1.3461165369,-0.6142942914  
 F,0,1.8494395781,0.5652103173,-0.4973702448  
 F,0,4.0612595605,0.5928329545,-0.0904983411

### TS NO2BF4 PCM ONIOM 3.099\_93450

ONIOM(M062X/6-311G\*:PM3)  
 E(RPM3) = 0.280523634869

Zero-point correction= 0.157616 (Hartree/Particle)  
 Thermal correction to Energy= 0.173566  
 Thermal correction to Enthalpy= 0.174510  
 Thermal correction to Gibbs Free Energy= 0.111767  
 Sum of electronic and ZPE= -476.888642  
 Sum of electronic and thermal Energies= -476.872693  
 Sum of electronic and thermal Enthalpies= -476.871749  
 Sum of electronic and thermal Free Energies= -476.934492

| E             | CV        | S         |
|---------------|-----------|-----------|
| KCal/Mol      | Cal/Mol-K | Cal/Mol-K |
| Total 108.914 | 53.904    | 132.055   |

C,0,-3.7681847838,-0.1030048406,-0.3098101657  
 C,0,-3.5359779163,0.8542355079,0.6677436454  
 C,0,-2.3207823696,1.5500349973,0.7132864373  
 C,0,-1.3103497574,1.3051413901,-0.2115702732  
 C,0,-1.5339878119,0.3040930866,-1.1678227678  
 C,0,-2.7566846225,-0.3899381435,-1.2236599099  
 C,0,-0.01794227,2.0727860165,-0.2025933301  
 H,0,-4.7120525223,-0.6312239421,-0.3543214266  
 H,0,-4.3010440225,1.0726827111,1.4033418995  
 H,0,-2.168857994,2.2993440945,1.4827204439  
 H,0,-0.7640581473,0.0864973646,-1.9029222078  
 H,0,-2.9100798601,-1.1371323689,-1.9945572094  
 H,0,0.0542158849,2.7006299523,-1.0935170328  
 H,0,0.8467554937,1.4005444738,-0.207492069  
 H,0,0.0536847157,2.7176210075,0.6725233632  
 N,0,-1.2335159649,-1.7348745911,0.4127942417  
 O,0,-1.55028369,-1.2703593437,1.3800864734  
 O,0,-0.7962810479,-2.4567910853,-0.3278258066

F,0,3.5641318571,1.306858997,-0.2747360345  
 B,0,3.2374410406,0.0018281682,0.0259924562  
 F,0,4.3908393548,-0.7327182984,0.2090092329  
 F,0,2.4866886022,-0.03926299,1.1839562506  
 F,0,2.5113818314,-0.5479591639,-1.0115632109

### TS NO2BF4 PCM ONIOM 3.107\_93658

ONIOM(M062X/6-311G\*:PM3)  
 E(RPM3) = 0.280227926471

Zero-point correction= 0.157041 (Hartree/Particle)  
 Thermal correction to Energy= 0.173317  
 Thermal correction to Enthalpy= 0.174261  
 Thermal correction to Gibbs Free Energy= 0.109510  
 Sum of electronic and ZPE= -476.889055  
 Sum of electronic and thermal Energies= -476.872780  
 Sum of electronic and thermal Enthalpies= -476.871836  
 Sum of electronic and thermal Free Energies= -476.936587

| E             | CV        | S         |
|---------------|-----------|-----------|
| KCal/Mol      | Cal/Mol-K | Cal/Mol-K |
| Total 108.758 | 54.046    | 136.280   |

C,0,-0.2478575519,-1.063655345,-0.0783260366  
 C,0,-1.1334577255,-1.6805471471,0.7954031736  
 C,0,-2.512691603,-1.4687107564,0.680769267  
 C,0,-3.0404607341,-0.6386917455,-0.3041463934  
 C,0,-2.1393217414,0.014786356,-1.1545178678  
 C,0,-0.7516049734,-0.2041567798,-1.0502045603  
 C,0,-4.5243256209,-0.4511421198,-0.4591840538  
 H,0,0.8240186074,-1.2217578758,0.0053728004  
 H,0,-0.7584947342,-2.3341935239,1.574015726  
 H,0,-3.1837805033,-1.9647328726,1.3736836748  
 H,0,-2.5167744919,0.6744757399,-1.9299117267  
 H,0,-0.0735773334,0.297529259,-1.7336007378  
 H,0,-5.0429934722,-0.6092335389,0.4863487763  
 H,0,-4.9196100954,-1.1705103562,-1.1805629795  
 H,0,-4.7635333244,0.5475369468,-0.8261515489  
 N,0,-1.3359857955,1.7825479794,0.5300425108  
 O,0,-1.4521504821,1.2200019329,1.4908635209  
 O,0,-1.193563156,2.6338670075,-0.1896156183  
 F,0,3.3462878065,-1.3106915217,-0.7483193231  
 B,0,3.3414289906,-0.1149126975,-0.0606677133  
 F,0,4.6175755966,0.4082195215,-0.0354166846  
 F,0,2.4988386103,0.779287158,-0.6902751322  
 F,0,2.9087887271,-0.3214096208,1.2335289265

### TS NO2BF4 PCM ONIOM 3.119\_93855

ONIOM(M062X/6-311G\*:PM3)  
 E(RPM3) = 0.283232372106

Zero-point correction= 0.158157 (Hartree/Particle)  
 Thermal correction to Energy= 0.173706  
 Thermal correction to Enthalpy= 0.174650  
 Thermal correction to Gibbs Free Energy= 0.113100  
 Sum of electronic and ZPE= -476.893479  
 Sum of electronic and thermal Energies= -476.877931  
 Sum of electronic and thermal Enthalpies= -476.876987

Sum of electronic and thermal Free Energies= -476.938536

| E        | CV        | S         |
|----------|-----------|-----------|
| KCal/Mol | Cal/Mol-K | Cal/Mol-K |
| Total    | 109.002   | 53.516    |
|          | 129.542   |           |

C,0,3.4948409159,0.2701610057,-0.2827532036  
 C,0,2.8168147608,0.4945654408,0.9115465642  
 C,0,1.7035879115,-0.296875606,1.2547915087  
 C,0,1.2646266756,-1.3294766482,0.4183103945  
 C,0,1.9413748645,-1.5174136267,-0.7868653265  
 C,0,3.0412986384,-0.7287940504,-1.1361102332  
 C,0,0.0766743639,-2.1727473908,0.7792766376  
 H,0,4.3564224429,0.8709788386,-0.544812752  
 H,0,3.1535844776,1.2658475952,1.5953276172  
 H,0,1.1996651773,-0.1235251859,2.2008487915  
 H,0,1.6092079035,-2.2963201574,-1.4651131297  
 H,0,3.5447755877,-0.9051984177,-2.0790494532  
 H,0,-0.1064937723,-2.1598705204,1.8533344998  
 H,0,0.2238598019,-3.2067198591,0.4667408471  
 H,0,-0.839736399,-1.8025090133,0.2732519466  
 N,0,0.7310765548,1.708395222,-0.1370565899  
 O,0,0.7524128189,1.2425874241,-1.152383538  
 O,0,0.5242732296,2.4036457241,0.7183641595  
 F,0,-1.7108360574,0.7768957335,0.1766128492  
 B,0,-2.8003103231,-0.0286700252,-0.1170053868  
 F,0,-2.3426783943,-1.2648971012,-0.5281743491  
 F,0,-3.5808230947,-0.1708358061,1.007847343  
 F,0,-3.5336840839,0.5543994247,-1.1260911969

### TS NO2BF4 PCM ONIOM 3.119\_93935

ONIOM(M062X/6-311G\*:PM3)  
 E(RPM3) = 0.284974969347

Zero-point correction= 0.157584 (Hartree/Particle)  
 Thermal correction to Energy= 0.173458  
 Thermal correction to Enthalpy= 0.174402  
 Thermal correction to Gibbs Free Energy= 0.112713  
 Sum of electronic and ZPE= -476.894480  
 Sum of electronic and thermal Energies= -476.878606  
 Sum of electronic and thermal Enthalpies= -476.877662  
 Sum of electronic and thermal Free Energies= -476.939352

| E        | CV        | S         |
|----------|-----------|-----------|
| KCal/Mol | Cal/Mol-K | Cal/Mol-K |
| Total    | 108.847   | 53.944    |
|          | 129.837   |           |

C,0,-3.3021454725,-0.7248114187,0.3588455249  
 C,0,-2.2380908749,-0.6681815587,1.257912484  
 C,0,-1.2938527201,0.3680635734,1.1704369387  
 C,0,-1.3972857567,1.3623313538,0.1889140065  
 C,0,-2.4522118164,1.2725529258,-0.7154266065  
 C,0,-3.3951288085,0.2404835947,-0.6335208041  
 C,0,-0.3754934517,2.4636173572,0.1206900624  
 H,0,-4.035539406,-1.5179544007,0.4289189923  
 H,0,-2.1422389875,-1.4134856101,2.0397750139  
 H,0,-0.4735149614,0.4055635043,1.8837804999  
 H,0,-2.54736967,2.0163221534,-1.4989749988  
 H,0,-4.2037064779,0.2008332721,-1.3535157121  
 H,0,-0.5672062101,3.1334985279,-0.7162438163

H,0,0.6330803907,2.0506643086,0.006979562  
 H,0,-0.3829712247,3.0513469474,1.0406753392  
 N,0,-0.4019599373,-1.5563306484,-0.4324882499  
 O,0,-0.8435892795,-1.1698838553,-1.3830492586  
 O,0,0.1925975886,-2.1429020321,0.3143236405  
 F,0,3.1474863882,1.3811552349,-0.0923456203  
 B,0,2.658438859,0.0981847026,-0.0160883511  
 F,0,1.7852748263,-0.149863002,-1.0645781328  
 F,0,3.6961063469,-0.8046349996,-0.069412343  
 F,0,1.9459236553,-0.0829949306,1.1527528292

### TS NO2BF4 PCM ONIOM 3.125\_93949

ONIOM(M062X/6-311G\*:PM3)  
 E(RPM3) = 0.283497076933

Zero-point correction= 0.157586 (Hartree/Particle)  
 Thermal correction to Energy= 0.173581  
 Thermal correction to Enthalpy= 0.174525  
 Thermal correction to Gibbs Free Energy= 0.111589  
 Sum of electronic and ZPE= -476.893496  
 Sum of electronic and thermal Energies= -476.877502  
 Sum of electronic and thermal Enthalpies= -476.876558  
 Sum of electronic and thermal Free Energies= -476.939494

| E        | CV        | S         |
|----------|-----------|-----------|
| KCal/Mol | Cal/Mol-K | Cal/Mol-K |
| Total    | 108.924   | 53.955    |
|          | 132.460   |           |

C,0,-3.5106872231,-0.3059477972,-0.3260345591  
 C,0,-2.8598944005,-0.5149651651,0.8863693476  
 C,0,-1.7656462627,0.2919453025,1.2506518874  
 C,0,-1.319812659,1.327060102,0.4193817859  
 C,0,-1.9672922366,1.499557085,-0.8022911633  
 C,0,-3.0477575726,0.6925382385,-1.1741939158  
 C,0,-0.1561875222,2.1919525353,0.8177615518  
 H,0,-4.3581301776,-0.9188690051,-0.6057240094  
 H,0,-3.2034101843,-1.2857176176,1.5674493486  
 H,0,-1.2823178495,0.1302331014,2.2097442285  
 H,0,-1.6302523757,2.2795360548,-1.4766784715  
 H,0,-3.5292875776,0.8564537443,-2.1309054025  
 H,0,-0.1042226303,2.3080327568,1.9004866524  
 H,0,-0.2316182332,3.1808203727,0.3658234538  
 H,0,0.7901922845,1.7482821864,0.4851063744  
 N,0,-0.7171387762,-1.6907998611,-0.103671641  
 O,0,-0.4878031396,-2.3592822083,0.7675538645  
 O,0,-0.7545418245,-1.2520213936,-1.1306987941  
 F,0,3.8423083218,-0.8456937962,-0.4570604309  
 B,0,2.8395065915,0.0385420048,-0.1240468969  
 F,0,2.5848577758,0.8684671106,-1.1940631054  
 F,0,1.6924331952,-0.6788945848,0.1817192364  
 F,0,3.2219694763,0.7831488338,0.9697266588

### TS NO2BF4 PCM ONIOM 3.130\_93945

ONIOM(M062X/6-311G\*:PM3)  
 E(RPM3) = 0.283803815230

Zero-point correction= 0.157378 (Hartree/Particle)  
 Thermal correction to Energy= 0.173421

Thermal correction to Enthalpy= 0.174365  
 Thermal correction to Gibbs Free Energy= 0.111440  
 Sum of electronic and ZPE= -476.893528  
 Sum of electronic and thermal Energies= -476.877484  
 Sum of electronic and thermal Enthalpies= -476.876540  
 Sum of electronic and thermal Free Energies= -476.939465

| E             | CV        | S         |
|---------------|-----------|-----------|
| KCal/Mol      | Cal/Mol-K | Cal/Mol-K |
| Total 108.823 | 53.937    | 132.437   |

C,0,-0.3827288153,-1.4610221546,0.1860600006  
 C,0,-0.6513585541,-0.4550868045,1.1088562922  
 C,0,-1.9239847498,0.1455550433,1.1531613278  
 C,0,-2.9482795031,-0.2675261064,0.2925640323  
 C,0,-2.6495167988,-1.256817626,-0.6416041543  
 C,0,-1.3830608543,-1.8469487593,-0.6985263663  
 C,0,-4.3253387828,0.3305942357,0.3801615901  
 H,0,0.6096287635,-1.8981210547,0.1368708035  
 H,0,0.1287841251,-0.1200936112,1.7866270022  
 H,0,-2.1204096856,0.920030997,1.8882922977  
 H,0,-3.4151456216,-1.5764082995,-1.3404266038  
 H,0,-1.1850234924,-2.6093653903,-1.442478374  
 H,0,-4.3022813081,1.3172879667,0.8432682057  
 H,0,-4.972229746,-0.3060910697,0.9884778382  
 H,0,-4.7812831559,0.4189436895,-0.6064310288  
 N,0,-0.617653682,1.560350888,-0.5984585371  
 O,0,-0.820713415,0.9756908177,-1.5291548209  
 O,0,-0.3193111032,2.3866609268,0.0997403972  
 F,0,2.7209804267,-0.4954340705,1.3831726791  
 B,0,2.9074428062,-0.1298280611,0.0681636818  
 F,0,3.008173531,-1.2539936698,-0.7219384011  
 F,0,1.8291347589,0.6335817597,-0.3547038125  
 F,0,4.0567338565,0.6210913532,-0.0462400498

### TS NO2BF4 PCM ONIOM 3.138\_94010

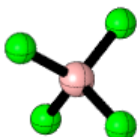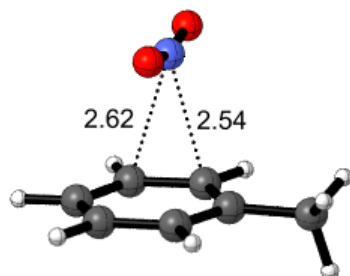

ONIOM(M062X/6-311G\*:PM3)  
 E(RPM3) = 0.280523313130

Zero-point correction= 0.156402 (Hartree/Particle)  
 Thermal correction to Energy= 0.173090  
 Thermal correction to Enthalpy= 0.174034  
 Thermal correction to Gibbs Free Energy= 0.104549  
 Sum of electronic and ZPE= -476.888255  
 Sum of electronic and thermal Energies= -476.871567  
 Sum of electronic and thermal Enthalpies= -476.870623  
 Sum of electronic and thermal Free Energies= -476.940108

| E             | CV        | S         |
|---------------|-----------|-----------|
| KCal/Mol      | Cal/Mol-K | Cal/Mol-K |
| Total 108.616 | 54.288    | 146.245   |

C,0,-2.95621,-1.965957,0.224333  
 C,0,-2.943216,-1.029008,1.250913  
 C,0,-3.250011,0.320777,0.980886  
 C,0,-3.602886,0.742775,-0.308982  
 C,0,-3.574924,-0.205569,-1.326573  
 C,0,-3.253709,-1.543082,-1.066063  
 C,0,-4.001371,2.167369,-0.575858  
 H,0,-2.720651,-3.0035,0.425229  
 H,0,-2.70719,-1.327685,2.266471  
 H,0,-3.256643,1.036737,1.797443  
 H,0,-3.809304,0.095037,-2.342362  
 H,0,-3.241616,-2.254206,-1.883756  
 H,0,-5.088353,2.267056,-0.521953  
 H,0,-3.68933,2.48585,-1.570782  
 H,0,-3.570825,2.847353,0.159722  
 N,0,-0.743892,0.229963,0.588546  
 O,0,-0.692354,-0.083251,-0.486151  
 O,0,-0.414449,0.607074,1.596045  
 F,0,3.533152,0.65596,-0.938277  
 B,0,4.480576,0.027604,-0.15624  
 F,0,5.278164,-0.768239,-0.951292  
 F,0,5.255887,0.976531,0.476423  
 F,0,3.847983,-0.754118,0.788731

### TS NO2BF4 PCM ONIOM 3.139\_93772

ONIOM(M062X/6-311G\*:PM3)  
 E(RPM3) = 0.280226078977

Zero-point correction= 0.157220 (Hartree/Particle)  
 Thermal correction to Energy= 0.173691  
 Thermal correction to Enthalpy= 0.174635  
 Thermal correction to Gibbs Free Energy= 0.107388  
 Sum of electronic and ZPE= -476.887891  
 Sum of electronic and thermal Energies= -476.871420  
 Sum of electronic and thermal Enthalpies= -476.870476  
 Sum of electronic and thermal Free Energies= -476.937723

| E             | CV        | S         |
|---------------|-----------|-----------|
| KCal/Mol      | Cal/Mol-K | Cal/Mol-K |
| Total 108.993 | 54.093    | 141.534   |

C,0,-1.319303,1.607591,0.685691  
 C,0,-2.102119,1.954466,-0.409645  
 C,0,-3.237448,1.20703,-0.743209  
 C,0,-3.617479,0.095922,0.004192  
 C,0,-2.795213,-0.278644,1.075673  
 C,0,-1.659132,0.479431,1.424391

C,0,-4.869053,-0.672238,-0.318656  
 H,0,-0.447581,2.193537,0.949457  
 H,0,-1.835655,2.81467,-1.012676  
 H,0,-3.834149,1.502269,-1.599815  
 H,0,-3.060504,-1.143505,1.676582  
 H,0,-1.06128,0.181569,2.279062  
 H,0,-5.059757,-0.684678,-1.392082  
 H,0,-5.729473,-0.20302,0.164834  
 H,0,-4.80983,-1.700581,0.038273  
 N,0,-0.950084,-1.3368,-0.337819  
 O,0,-0.979226,-0.691052,-1.252005  
 O,0,-0.706508,-2.194339,0.346731  
 F,0,4.925431,-0.482174,0.803191  
 B,0,3.991965,0.076864,-0.044034  
 F,0,2.986034,0.658574,0.700477  
 F,0,4.593989,1.03433,-0.832925  
 F,0,3.451585,-0.906862,-0.847096

### TS NO2BF4 PCM ONIOM 3.146\_93865

ONIOM(M062X/6-311G\*:PM3)  
 E(RPM3) = 0.279983587293

Zero-point correction= 0.156982 (Hartree/Particle)  
 Thermal correction to Energy= 0.173553  
 Thermal correction to Enthalpy= 0.174497  
 Thermal correction to Gibbs Free Energy= 0.106381  
 Sum of electronic and ZPE= -476.888056  
 Sum of electronic and thermal Energies= -476.871486  
 Sum of electronic and thermal Enthalpies= -476.870542  
 Sum of electronic and thermal Free Energies= -476.938658

| E             | CV        | S         |
|---------------|-----------|-----------|
| KCal/Mol      | Cal/Mol-K | Cal/Mol-K |
| Total 108.906 | 54.128    | 143.362   |

C,0,-1.568092,1.776682,0.451435  
 C,0,-2.54018,1.93872,-0.528878  
 C,0,-3.580674,1.012298,-0.665832  
 C,0,-3.674246,-0.098298,0.166994  
 C,0,-2.663083,-0.28221,1.121047  
 C,0,-1.623068,0.656115,1.27353  
 C,0,-4.817839,-1.068314,0.057302  
 H,0,-0.771132,2.501018,0.564292  
 H,0,-2.498975,2.793312,-1.193979  
 H,0,-4.32981,1.166667,-1.43505  
 H,0,-2.704812,-1.141087,1.78422  
 H,0,-0.872954,0.500807,2.041573  
 H,0,-4.518785,-2.072476,0.359428  
 H,0,-5.204596,-1.111201,-0.960952  
 H,0,-5.636573,-0.757078,0.710765  
 N,0,-0.884306,-1.146529,-0.49187  
 O,0,-1.135551,-0.575225,-1.421562  
 O,0,-0.42251,-1.911287,0.190056  
 F,0,4.877063,1.017677,-0.611263  
 B,0,4.099137,0.059828,0.004276  
 F,0,3.478706,-0.71494,-0.954507  
 F,0,4.891964,-0.741487,0.798668  
 F,0,3.141121,0.675277,0.783754

### TS NO2BF4 PCM ONIOM 3.182\_93693

ONIOM(M062X/6-311G\*:PM3)  
 E(RPM3) = 0.283532272052

Zero-point correction= 0.157814 (Hartree/Particle)  
 Thermal correction to Energy= 0.173702  
 Thermal correction to Enthalpy= 0.174647  
 Thermal correction to Gibbs Free Energy= 0.112236  
 Sum of electronic and ZPE= -476.891358  
 Sum of electronic and thermal Energies= -476.875469  
 Sum of electronic and thermal Enthalpies= -476.874525  
 Sum of electronic and thermal Free Energies= -476.936936

| E             | CV        | S         |
|---------------|-----------|-----------|
| KCal/Mol      | Cal/Mol-K | Cal/Mol-K |
| Total 109.000 | 53.827    | 131.355   |

C,0,0.869728,1.840317,-0.086325  
 C,0,2.051368,1.859372,0.646381  
 C,0,3.015822,0.861411,0.471833  
 C,0,2.821829,-0.179212,-0.431552  
 C,0,1.610064,-0.214012,-1.136783  
 C,0,0.645044,0.796086,-0.977356  
 C,0,3.873244,-1.229633,-0.662165  
 H,0,0.11815,2.607175,0.054118  
 H,0,2.22952,2.652118,1.363059  
 H,0,3.930564,0.899372,1.052942  
 H,0,1.42673,-1.018669,-1.842448  
 H,0,-0.28859,0.742605,-1.532729  
 H,0,4.470107,-0.974814,-1.541352  
 H,0,3.425287,-2.207942,-0.842251  
 H,0,4.549518,-1.306874,0.188886  
 N,0,0.19155,-1.119438,0.868088  
 O,0,-0.411148,-1.843825,0.263601  
 O,0,0.655733,-0.56242,1.720992  
 F,0,-2.143484,-1.045484,-0.649591  
 B,0,-2.760882,0.087827,-0.148865  
 F,0,-1.928274,0.573804,0.847119  
 F,0,-2.907,1.025727,-1.143805  
 F,0,-3.985352,-0.237608,0.384782

### TS NO2BF4 PCM ONIOM 3.341\_93662

ONIOM(M062X/6-311G\*:PM3)  
 E(RPM3) = 0.281527933861

Zero-point correction= 0.157834 (Hartree/Particle)  
 Thermal correction to Energy= 0.173687  
 Thermal correction to Enthalpy= 0.174631  
 Thermal correction to Gibbs Free Energy= 0.112712  
 Sum of electronic and ZPE= -476.891431  
 Sum of electronic and thermal Energies= -476.875578  
 Sum of electronic and thermal Enthalpies= -476.874634  
 Sum of electronic and thermal Free Energies= -476.936553

| E             | CV        | S         |
|---------------|-----------|-----------|
| KCal/Mol      | Cal/Mol-K | Cal/Mol-K |
| Total 108.990 | 53.810    | 130.318   |

C,0,1.1925142962,2.0209814205,-0.0626052304  
 C,0,2.4179528437,1.7784993049,0.5580469855

C,0,3.1166354993,0.5956471237,0.3194253928  
 C,0,2.6053642051,-0.3778583479,-0.5359148493  
 C,0,1.3568263337,-0.135020221,-1.1353614835  
 C,0,0.6624017372,1.0619857621,-0.915252695  
 C,0,3.3703558879,-1.6374970087,-0.8354166172  
 H,0,0.6548625998,2.9409276166,0.1293491737  
 H,0,2.8328447913,2.51575558,1.2351412447  
 H,0,4.0696525594,0.4285809059,0.8090472676  
 H,0,0.9300012401,-0.8822024324,-1.7986317292  
 H,0,-0.305730639,1.214178878,-1.3852122752  
 H,0,4.0011298506,-1.4906021477,-1.7158175371  
 H,0,2.7002012488,-2.4714129538,-1.0493196199  
 H,0,4.0191059872,-1.9141237035,-0.004296111  
 N,0,0.1906914861,-0.9559005745,1.0780010733  
 O,0,-0.3635076842,-1.7751955651,0.5587049054  
 O,0,0.6187281238,-0.2470038306,1.8273412336  
 F,0,-1.9512120614,-0.986894728,-0.6451485094  
 B,0,-2.7155832503,0.072259934,-0.1848121496  
 F,0,-2.0019267598,0.6322853106,0.8632245527  
 F,0,-2.8987501667,0.9982631414,-1.1843998396  
 F,0,-3.9300651287,-0.3848564646,0.2686428171

**Pi Complexes for Toluene / NO<sub>2</sub><sup>+</sup>BF<sub>4</sub><sup>-</sup>  
 ONIOM(M062X/6-  
 311G\*:PM3)/PCM(CH<sub>2</sub>Cl<sub>2</sub>)**

**Pi Complex NO<sub>2</sub>BF<sub>4</sub> PCM ONIOM  
 2.727\_94123**

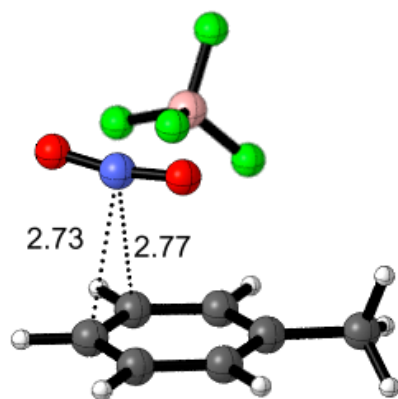

ONIOM(M062X/6-311G\*:PM3)  
 E(RPM3) = 0.277319186051

Zero-point correction= 0.157909 (Hartree/Particle)  
 Thermal correction to Energy= 0.174806  
 Thermal correction to Enthalpy= 0.175751  
 Thermal correction to Gibbs Free Energy= 0.110238  
 Sum of electronic and ZPE= -476.893568  
 Sum of electronic and thermal Energies= -476.876670  
 Sum of electronic and thermal Enthalpies= -476.875726  
 Sum of electronic and thermal Free Energies= -476.941238

| E             | CV        | S         |
|---------------|-----------|-----------|
| KCal/Mol      | Cal/Mol-K | Cal/Mol-K |
| Total 109.693 | 55.813    | 137.883   |

C,0,2.0243110462,-1.1198338361,-1.2361097836

C,0,0.9237187983,-0.261719388,-1.3653063835  
 C,0,0.9343670649,0.9870599447,-0.7503421204  
 C,0,2.0317817943,1.3987786419,0.0084284194  
 C,0,3.1324000593,0.535138849,0.117631817  
 C,0,3.1367467403,-0.7068679903,-0.5015778393  
 C,0,2.0351339021,2.7245979483,0.7162011028  
 H,0,2.0200468404,-2.0865279526,-1.7266708772  
 H,0,0.0556473451,-0.5721357543,-1.9381463024  
 H,0,0.0651546775,1.6323434211,-0.8400670706  
 H,0,3.9934542015,0.8489090961,0.6983134749  
 H,0,3.9984873981,-1.3568468226,-0.4110019521  
 H,0,1.8207997292,2.5885718158,1.7798688004  
 H,0,1.2815676458,3.3963897177,0.3057825866  
 H,0,3.0106355006,3.2068111431,0.6381683703  
 N,0,0.5464302646,-1.6808939886,0.9866215372  
 O,0,0.9318424854,-0.8588596325,1.6283541808  
 O,0,0.0784531361,-2.5902563669,0.5401311422  
 F,0,-2.5076498748,1.5285181873,-0.5064847311  
 B,0,-2.7743416203,0.2314361905,-0.1283938447  
 F,0,-3.1826965483,-0.5004014606,-1.2218708245  
 F,0,-1.6297273853,-0.3467885189,0.3998629116  
 F,0,-3.7623212012,0.222309756,0.8321183862

**Pi Complex NO<sub>2</sub>BF<sub>4</sub> PCM ONIOM  
 2.731\_94156**

ONIOM(M062X/6-311G\*:PM3)  
 E(RPM3) = 0.275835792227

Zero-point correction= 0.158085 (Hartree/Particle)  
 Thermal correction to Energy= 0.174956  
 Thermal correction to Enthalpy= 0.175900  
 Thermal correction to Gibbs Free Energy= 0.109954  
 Sum of electronic and ZPE= -476.893430  
 Sum of electronic and thermal Energies= -476.876559  
 Sum of electronic and thermal Enthalpies= -476.875615  
 Sum of electronic and thermal Free Energies= -476.941561

| E             | CV        | S         |
|---------------|-----------|-----------|
| KCal/Mol      | Cal/Mol-K | Cal/Mol-K |
| Total 109.786 | 55.764    | 138.795   |

C,0,-2.7526799987,-3.2822077645,-0.5237856215  
 C,0,-3.7168170082,-2.9617021087,-1.4871374555  
 C,0,-3.4138564705,-3.0727555219,-2.8409388706  
 C,0,-2.1492491674,-3.492992918,-3.257407313  
 C,0,-1.1936607732,-3.814752487,-2.2818607745  
 C,0,-1.4903509322,-3.7224208487,-0.929035911  
 C,0,-1.800914383,-3.5972160511,-4.7159635405  
 H,0,-2.9913243822,-3.2077210482,0.5314188011  
 H,0,-4.7051315343,-2.6419946115,-1.1768870659  
 H,0,-4.1663230025,-2.8261091741,-3.5818076776  
 H,0,-0.2073445043,-4.141366856,-2.5948114047  
 H,0,-0.7362163279,-3.9638440473,-0.1862393024  
 H,0,-2.6749267096,-3.4374056538,-5.3465884272  
 H,0,-1.38563567,-4.5808317214,-4.9438433899  
 H,0,-1.0448351507,-2.8555731293,-4.9856037385  
 N,0,-2.0685680996,-0.6836914865,-1.0168195253  
 O,0,-2.5553819302,-0.3191541654,-0.0826821915  
 O,0,-1.5233869155,-0.8511953567,-1.9700062745  
 F,0,1.3794214955,-0.9445783826,2.105780924

B,0,1.1823587158,-1.7872517893,1.0339931238  
 F,0,2.2368678065,-1.6754631829,0.1544564462  
 F,0,1.0805428465,-3.087689755,1.4760644311  
 F,0,0.0118732954,-1.42627814,0.3837912579

### Pi Complex NO2BF4 PCM ONIOM 2.750\_94123

ONIOM(M062X/6-311G\*:PM3)  
 E(RPM3) = 0.275463893129

Zero-point correction= 0.158040 (Hartree/Particle)  
 Thermal correction to Energy= 0.174847  
 Thermal correction to Enthalpy= 0.175791  
 Thermal correction to Gibbs Free Energy= 0.110262  
 Sum of electronic and ZPE= -476.893452  
 Sum of electronic and thermal Energies= -476.876646  
 Sum of electronic and thermal Enthalpies= -476.875701  
 Sum of electronic and thermal Free Energies= -476.941230

| E             | CV        | S         |
|---------------|-----------|-----------|
| KCal/Mol      | Cal/Mol-K | Cal/Mol-K |
| Total 109.718 | 55.756    | 137.917   |

C,0,-1.3542900963,-0.957284536,1.3924321068  
 C,0,-0.9517617727,0.3747870075,1.2660824863  
 C,0,-1.7057838568,1.254239155,0.5010209439  
 C,0,-2.8831104377,0.8347977899,-0.1356706858  
 C,0,-3.282975175,-0.4951835944,0.0088757669  
 C,0,-2.5269544952,-1.388519579,0.7621469735  
 C,0,-3.6869510619,1.8131561631,-0.9461448302  
 H,0,-0.7695390938,-1.6495774174,1.9880289592  
 H,0,-0.0366126111,0.7135481094,1.7421987087  
 H,0,-1.3824881422,2.2842660478,0.391052719  
 H,0,-4.1920380861,-0.8361416429,-0.4742170844  
 H,0,-2.8523426845,-2.4168023538,0.870784776  
 H,0,-4.5398553098,1.3325527781,-1.423952779  
 H,0,-3.0707047742,2.2740842225,-1.721335919  
 H,0,-4.0604732241,2.6179062565,-0.3087173432  
 N,0,-0.3178322503,-1.5008319031,-1.096176228  
 O,0,0.167104222,-2.4366465528,-0.7349601101  
 O,0,-0.7200362836,-0.6105302001,-1.6234512444  
 F,0,3.1381463412,1.561208126,-0.5900821345  
 B,0,2.8239116312,0.5576290366,0.2997863688  
 F,0,3.8956983854,-0.2971772124,0.435127625  
 F,0,2.5075457227,1.101718914,1.5250915272  
 F,0,1.7367060527,-0.1547796146,-0.1832936026

### Pi Complex NO2BF4 PCM ONIOM 2.750\_94145

ONIOM(M062X/6-311G\*:PM3)  
 E(RPM3) = 0.276758808342

Zero-point correction= 0.157889 (Hartree/Particle)  
 Thermal correction to Energy= 0.174751  
 Thermal correction to Enthalpy= 0.175695  
 Thermal correction to Gibbs Free Energy= 0.110402  
 Sum of electronic and ZPE= -476.893966  
 Sum of electronic and thermal Energies= -476.877105

Sum of electronic and thermal Enthalpies= -476.876161  
 Sum of electronic and thermal Free Energies= -476.941484

| E             | CV        | S         |
|---------------|-----------|-----------|
| KCal/Mol      | Cal/Mol-K | Cal/Mol-K |
| Total 109.658 | 55.760    | 137.421   |

C,0,0.0883681213,-1.5282565367,-0.3839513117  
 C,0,-1.1443820513,-1.0645989768,-0.86111158729  
 C,0,-1.2003556734,0.0558516397,-1.686939576  
 C,0,-0.0365030615,0.7355809432,-2.0467953649  
 C,0,1.1930285935,0.2542120977,-1.569269543  
 C,0,1.2600671874,-0.8671268523,-0.7545149194  
 C,0,-0.0811450378,1.9548302944,-2.9246014497  
 H,0,0.1316582705,-2.4065105815,0.2498150055  
 H,0,-2.065350787,-1.5682226883,-0.5809207645  
 H,0,-2.1691711078,0.4181852941,-2.0219845939  
 H,0,2.1054727793,0.773291037,-1.8440457486  
 H,0,2.2193339695,-1.2250730886,-0.4007372123  
 H,0,-1.1045114703,2.2116338672,-3.1967034003  
 H,0,0.485100401,1.7859837355,-3.8431536072  
 H,0,0.3669349051,2.8134465043,-2.4196051155  
 N,0,-0.6413911065,0.3900824665,1.4463390135  
 O,0,-0.2191888005,1.2594192574,0.8979017559  
 O,0,-1.0710499946,-0.3454775614,2.1662488367  
 F,0,-3.0831652049,0.8922532035,0.6330929634  
 B,0,-4.2812859844,0.8313023519,-0.0642206828  
 F,0,-5.3144993488,1.1132538618,0.8023390884  
 F,0,-4.2630811234,1.75889895,-1.0824156464  
 F,0,-4.4452247756,-0.4344443184,-0.5824140543

### Pi Complex NO2BF4 PCM ONIOM 2.754\_94188

ONIOM(M062X/6-311G\*:PM3)  
 E(RPM3) = 0.275832663268

Zero-point correction= 0.157975 (Hartree/Particle)  
 Thermal correction to Energy= 0.174817  
 Thermal correction to Enthalpy= 0.175762  
 Thermal correction to Gibbs Free Energy= 0.109972  
 Sum of electronic and ZPE= -476.893882  
 Sum of electronic and thermal Energies= -476.877039  
 Sum of electronic and thermal Enthalpies= -476.876095  
 Sum of electronic and thermal Free Energies= -476.941885

| E             | CV        | S         |
|---------------|-----------|-----------|
| KCal/Mol      | Cal/Mol-K | Cal/Mol-K |
| Total 109.700 | 55.768    | 138.467   |

C,0,0.6484210141,0.0548256445,1.4246063295  
 C,0,0.576774373,-1.0858450623,0.6265568603  
 C,0,1.6763817423,-1.4720778693,-0.1309907103  
 C,0,2.8733311266,-0.7444165712,-0.0928279513  
 C,0,2.9397932494,0.3883728763,0.7218994546  
 C,0,1.8391825742,0.7927034487,1.4712657631  
 C,0,4.068728052,-1.1913893963,-0.8879386482  
 H,0,-0.2179645712,0.3658310946,2.0009667594  
 H,0,-0.3527793388,-1.6460085456,0.5731282287  
 H,0,1.609877126,-2.3495700526,-0.7652356576  
 H,0,3.8590679097,0.9621420723,0.7653337297

H,0,1.9053133145,1.673540542,2.1000926967  
 H,0,4.691141829,-1.8579397226,-0.2849470145  
 H,0,4.6866526395,-0.3438595285,-1.1860561599  
 H,0,3.7702908737,-1.7381915779,-1.7827462759  
 N,0,0.3737714708,1.7637747488,-0.7175227834  
 O,0,0.857157424,1.0910607023,-1.4571226283  
 O,0,-0.1552223856,2.552679057,-0.1350064751  
 F,0,-2.6990885913,-0.4454847688,1.3163937799  
 B,0,-2.8393762995,-0.4272221369,-0.053936167  
 F,0,-2.7485555596,-1.7069878791,-0.5553045257  
 F,0,-4.0604636975,0.1160946627,-0.3879552552  
 F,0,-1.8351032751,0.354018262,-0.6073163494

### Pi Complex NO2BF4 PCM ONIOM 2.763\_94064

ONIOM(M062X/6-311G\*:PM3)  
 E(RPM3) = 0.274782288346

Zero-point correction= 0.158015 (Hartree/Particle)  
 Thermal correction to Energy= 0.174810  
 Thermal correction to Enthalpy= 0.175754  
 Thermal correction to Gibbs Free Energy= 0.110746  
 Sum of electronic and ZPE= -476.893373  
 Sum of electronic and thermal Energies= -476.876578  
 Sum of electronic and thermal Enthalpies= -476.875634  
 Sum of electronic and thermal Free Energies= -476.940641

| E             | CV        | S         |
|---------------|-----------|-----------|
| KCal/Mol      | Cal/Mol-K | Cal/Mol-K |
| Total 109.695 | 55.730    | 136.820   |

C,0,-1.3305096692,0.6246798162,1.7183039599  
 C,0,-2.6215812971,0.9402745364,1.2834924297  
 C,0,-3.2795795229,0.0986236824,0.3939265035  
 C,0,-2.6684531357,-1.068096806,-0.0765769715  
 C,0,-1.3811675004,-1.3806580423,0.3786465806  
 C,0,-0.7159466804,-0.5483719149,1.2699805992  
 C,0,-3.3599159245,-1.9576873963,-1.07184155  
 H,0,-0.8163856445,1.2750953182,2.4171792285  
 H,0,-3.1101338729,1.8371959221,1.6459543221  
 H,0,-4.2803464694,0.3478134125,0.0579393665  
 H,0,-0.8973637382,-2.2847722131,0.0240929822  
 H,0,0.2881542985,-0.7975628075,1.6004363663  
 H,0,-4.4348378863,-1.7787520047,-1.0856530589  
 H,0,-3.184708929,-3.0103355059,-0.8454817307  
 H,0,-2.9764425028,-1.7713564822,-2.0791625333  
 N,0,-0.5436955526,1.7728782412,-0.6692212219  
 O,0,-0.039534421,2.6067366163,-0.1302585548  
 O,0,-0.9964712766,1.0268228573,-1.3545997299  
 F,0,2.7838075074,-0.9457494638,0.9670968215  
 B,0,2.7991020786,-0.3882176067,-0.2921562064  
 F,0,2.8336708458,-1.3832792828,-1.2441014758  
 F,0,1.6555908028,0.3749407516,-0.476187582  
 F,0,3.9037654904,0.423644372,-0.4282355448

### Pi Complex NO2BF4 PCM ONIOM 2.765\_93840

ONIOM(M062X/6-311G\*:PM3)

E(RPM3) = 0.269314072713

Zero-point correction= 0.158372 (Hartree/Particle)  
 Thermal correction to Energy= 0.174965  
 Thermal correction to Enthalpy= 0.175909  
 Thermal correction to Gibbs Free Energy= 0.110873  
 Sum of electronic and ZPE= -476.890907  
 Sum of electronic and thermal Energies= -476.874314  
 Sum of electronic and thermal Enthalpies= -476.873370  
 Sum of electronic and thermal Free Energies= -476.938406

| E             | CV        | S         |
|---------------|-----------|-----------|
| KCal/Mol      | Cal/Mol-K | Cal/Mol-K |
| Total 109.792 | 55.407    | 136.879   |

C,0,-1.2151308202,0.6288312051,1.2999564902  
 C,0,-2.5689066913,0.9632149359,1.1936019162  
 C,0,-3.4382906609,0.1370886099,0.4865960128  
 C,0,-2.9742334923,-1.027562861,-0.1274679026  
 C,0,-1.6154697885,-1.352802616,-0.0067269952  
 C,0,-0.7403078472,-0.5414274677,0.7031228915  
 C,0,-3.8986911294,-1.928346949,-0.8991632547  
 H,0,-0.5410887181,1.265261516,1.8626909118  
 H,0,-2.9435404288,1.8597042355,1.6744467667  
 H,0,-4.4869568825,0.4020402826,0.4095246248  
 H,0,-1.2448601327,-2.25665729,-0.4793980801  
 H,0,0.3250869279,-0.8128541544,0.7876422834  
 H,0,-3.526022879,-2.0922918314,-1.9127567513  
 H,0,-4.9023829195,-1.5095827838,-0.9650371871  
 H,0,-3.9684007972,-2.9064675259,-0.41772505  
 N,0,-1.2033431051,1.9352278478,-1.1375795281  
 O,0,-1.6228771859,1.09969079,-1.7341285314  
 O,0,-0.760601548,2.8520996427,-0.6888388316  
 F,0,2.6428407548,0.1953583873,-0.6961039669  
 B,0,3.0867133555,-0.521987459,0.3953436374  
 F,0,3.568359213,0.3475818259,1.3504690871  
 F,0,2.0345277517,-1.2481104392,0.923478247  
 F,0,4.0872850237,-1.3850629011,0.0040922101

### Pi Complex NO2BF4 PCM ONIOM 2.768\_94165

ONIOM(M062X/6-311G\*:PM3)  
 E(RPM3) = 0.274298805200

Zero-point correction= 0.157883 (Hartree/Particle)  
 Thermal correction to Energy= 0.174813  
 Thermal correction to Enthalpy= 0.175757  
 Thermal correction to Gibbs Free Energy= 0.109751  
 Sum of electronic and ZPE= -476.893523  
 Sum of electronic and thermal Energies= -476.876592  
 Sum of electronic and thermal Enthalpies= -476.875648  
 Sum of electronic and thermal Free Energies= -476.941655

| E             | CV        | S         |
|---------------|-----------|-----------|
| KCal/Mol      | Cal/Mol-K | Cal/Mol-K |
| Total 109.697 | 55.769    | 138.923   |

C,0,-1.8085554837,2.0886892327,1.6905850152  
 C,0,-1.9632011711,2.6919178773,0.4376302692  
 C,0,-2.7137650807,2.0628214832,-0.5454888973

C,0,-3.3341921216,0.8296688184,-0.3021757839  
 C,0,-3.1863626774,0.2453924064,0.9587109152  
 C,0,-2.4318357643,0.8655807672,1.9505467575  
 C,0,-4.1475301839,0.1650088323,-1.3780240051  
 H,0,-1.2262091833,2.5781167312,2.4633064818  
 H,0,-1.496294967,3.6488961598,0.23701982  
 H,0,-2.8245392585,2.5290593649,-1.5191075439  
 H,0,-3.6577158185,-0.7098227315,1.1629666621  
 H,0,-2.3128700674,0.3869385904,2.9185854221  
 H,0,-3.58511137,0.1031015272,-2.3118762822  
 H,0,-5.0529686703,0.7416634667,-1.5819865746  
 H,0,-4.4457595479,-0.8418738845,-1.0871773309  
 N,0,0.1623715847,0.5029685731,0.5665679692  
 O,0,-0.4483559553,0.072921305,-0.2539745481  
 O,0,0.910271627,0.854687273,1.3123964218  
 F,0,-0.3823956847,-1.4319010115,2.2603891697  
 B,0,-0.5215161356,-2.1917400705,3.4120342712  
 F,0,0.5093685691,-1.8917354944,4.2754769211  
 F,0,-1.727756526,-1.9031717334,4.0111301753  
 F,0,-0.4753605136,-3.5270334831,3.0767858949

### Pi Complex NO2BF4 PCM ONIOM 2.770\_94103

ONIOM(M062X/6-311G\*:PM3)  
 E(RPM3) = 0.269841120227

Zero-point correction= 0.158274 (Hartree/Particle)  
 Thermal correction to Energy= 0.175059  
 Thermal correction to Enthalpy= 0.176003  
 Thermal correction to Gibbs Free Energy= 0.108264  
 Sum of electronic and ZPE= -476.891026  
 Sum of electronic and thermal Energies= -476.874242  
 Sum of electronic and thermal Enthalpies= -476.873297  
 Sum of electronic and thermal Free Energies= -476.941036

| E             | CV        | S         |
|---------------|-----------|-----------|
| KCal/Mol      | Cal/Mol-K | Cal/Mol-K |
| Total 109.851 | 55.436    | 142.568   |

C,0,-2.381805155,-3.6461105929,-0.7101818265  
 C,0,-3.3944953505,-4.1429224965,-1.5320349979  
 C,0,-3.2569487544,-4.0811816589,-2.9115937368  
 C,0,-2.1046940739,-3.5415337029,-3.5021593123  
 C,0,-1.0901880918,-3.0667652176,-2.670259719  
 C,0,-1.2239469849,-3.1090384281,-1.2841163166  
 C,0,-1.9848592183,-3.468822124,-4.999109442  
 H,0,-2.4784508006,-3.697321984,0.3684319125  
 H,0,-4.287037887,-4.5736393596,-1.0943861994  
 H,0,-4.0496468482,-4.4595241538,-3.5485896434  
 H,0,-0.1869301299,-2.6548421066,-3.1074151066  
 H,0,-0.4129864941,-2.7318026484,-0.6388400167  
 H,0,-0.9746827592,-3.1968474879,-5.3042142197  
 H,0,-2.6736511229,-2.7225674602,-5.4037461898  
 H,0,-2.2383687867,-4.4265492355,-5.4570846445  
 N,0,-3.0778011849,-1.0051881626,-1.178212652  
 O,0,-2.8516241651,-0.6897546217,-0.1353167419  
 O,0,-3.3848892843,-1.1565743058,-2.2339808555  
 F,0,2.6157525667,-1.1681255451,-0.600885921  
 B,0,1.7695188088,-1.0706159708,0.4826736237  
 F,0,0.8316866103,-2.0863512175,0.4284144674

F,0,2.4914521913,-1.1799034308,1.6512572975  
 F,0,1.1196901146,0.1455055112,0.4502443406

### Pi Complex NO2BF4 PCM ONIOM 2.782\_93989

ONIOM(M062X/6-311G\*:PM3)  
 E(RPM3) = 0.274781462191

Zero-point correction= 0.158187 (Hartree/Particle)  
 Thermal correction to Energy= 0.174943  
 Thermal correction to Enthalpy= 0.175887  
 Thermal correction to Gibbs Free Energy= 0.110415  
 Sum of electronic and ZPE= -476.892121  
 Sum of electronic and thermal Energies= -476.875365  
 Sum of electronic and thermal Enthalpies= -476.874421  
 Sum of electronic and thermal Free Energies= -476.939893

| E             | CV        | S         |
|---------------|-----------|-----------|
| KCal/Mol      | Cal/Mol-K | Cal/Mol-K |
| Total 109.778 | 55.625    | 137.798   |

C,0,2.4503276908,-1.3334665444,0.9658425561  
 C,0,3.330018558,-0.9003847672,-0.0274534545  
 C,0,3.266139398,0.4090513684,-0.483799244  
 C,0,2.3403381176,1.3201017553,0.048238561  
 C,0,1.4814653176,0.8832855088,1.0576611443  
 C,0,1.5272575376,-0.4337247452,1.5110673628  
 C,0,2.285131852,2.7298578678,-0.4717245886  
 H,0,2.4965616091,-2.3530960006,1.3315059885  
 H,0,4.0567893031,-1.5868988017,-0.4452725818  
 H,0,3.9424873933,0.7398879017,-1.265423794  
 H,0,0.761760211,1.5736050432,1.4851950337  
 H,0,0.8537412019,-0.7589521959,2.2967450302  
 H,0,3.2595596594,3.2138101645,-0.377647259  
 H,0,1.551819859,3.3262393852,0.0703552723  
 H,0,2.0181625991,2.7403370126,-1.5313583354  
 N,0,0.3222945209,-1.5135008382,-0.8185408221  
 O,0,0.6424896312,-0.6553543387,-1.445254477  
 O,0,-0.1057004082,-2.4149199452,-0.3241465846  
 F,0,-2.0432433691,-0.3352939185,-0.6220138399  
 B,0,-3.0636398249,0.3073150743,0.0616269134  
 F,0,-3.874016629,0.961773689,-0.8392969159  
 F,0,-3.7968004428,-0.6274632158,0.7588502173  
 F,0,-2.5100497856,1.2133815404,0.9395408172

### Pi Complex NO2BF4 PCM ONIOM 2.788\_93809

ONIOM(M062X/6-311G\*:PM3)  
 E(RPM3) = 0.268745628951

Zero-point correction= 0.157810 (Hartree/Particle)  
 Thermal correction to Energy= 0.174777  
 Thermal correction to Enthalpy= 0.175721  
 Thermal correction to Gibbs Free Energy= 0.109249  
 Sum of electronic and ZPE= -476.889532  
 Sum of electronic and thermal Energies= -476.872565  
 Sum of electronic and thermal Enthalpies= -476.871621  
 Sum of electronic and thermal Free Energies= -476.938093



E CV S  
KCal/Mol Cal/Mol-K Cal/Mol-K  
Total 109.674 55.744 139.903

C,0,0.9354279697,-0.410030922,1.4317404439  
C,0,2.31784071,-0.6127072306,1.4792365674  
C,0,3.1697010641,0.2130904951,0.7500657915  
C,0,2.6607154837,1.2462294525,-0.0391128238  
C,0,1.2727948786,1.4426676169,-0.0719321035  
C,0,0.4154224886,0.6305780037,0.6584354003  
C,0,3.565973485,2.1318411211,-0.8502289298  
H,0,0.2721844789,-1.0424511539,2.0118418376  
H,0,2.7276111924,-1.4041367091,2.0966980814  
H,0,4.2413384322,0.0523637711,0.7945148922  
H,0,0.8659915266,2.2447538818,-0.6794720902  
H,0,-0.6595388213,0.7943335746,0.6205470144  
H,0,3.3680176706,3.1843553648,-0.6384546215  
H,0,3.3969805341,1.9787928851,-1.9191875094  
H,0,4.6158285826,1.929826802,-0.6398310147  
N,0,1.2774352222,-2.0043377281,-0.8299597963  
O,0,0.8702160668,-2.8960344209,-0.3052410517  
O,0,1.6848191742,-1.2033389198,-1.4793396838  
F,0,-4.5999356621,0.0375245079,-0.3577496832  
B,0,-3.2776753874,0.2793765244,-0.0489339485  
F,0,-3.1259130519,0.3199385126,1.3214423266  
F,0,-2.4988679234,-0.7326941682,-0.5743723401  
F,0,-2.8932491142,1.4854527392,-0.5978617587

### Pi Complex NO2BF4 PCM ONIOM 2.789\_94125

ONIOM(M062X/6-311G\*:PM3)  
E(RPM3) = 0.275819250827

Zero-point correction= 0.157993 (Hartree/Particle)  
Thermal correction to Energy= 0.174880  
Thermal correction to Enthalpy= 0.175824  
Thermal correction to Gibbs Free Energy= 0.110130  
Sum of electronic and ZPE= -476.893392  
Sum of electronic and thermal Energies= -476.876504  
Sum of electronic and thermal Enthalpies= -476.875560  
Sum of electronic and thermal Free Energies= -476.941254

E CV S  
KCal/Mol Cal/Mol-K Cal/Mol-K  
Total 109.739 55.802 138.265

C,0,-0.5997583627,-5.0760376813,3.2579206179  
C,0,-0.0905813002,-5.8020675744,2.1841753194  
C,0,-0.9305564685,-6.6290421181,1.4453519975  
C,0,-2.2930087883,-6.7388902043,1.7499477731  
C,0,-2.7986772994,-5.9896880467,2.8165781645  
C,0,-1.9640388103,-5.1695541705,3.5687013902  
C,0,-3.1933439423,-7.6564326882,0.969845457  
H,0,0.0463704508,-4.4264348595,3.8372456818  
H,0,0.9591393893,-5.7279575041,1.9272296749  
H,0,-0.5251775161,-7.2003757629,0.6171480676  
H,0,-3.8498439,-6.069291875,3.081368176  
H,0,-2.3726880672,-4.6033720609,4.399026112  
H,0,-4.1551315111,-7.1817776796,0.769954714

H,0,-3.3920253356,-8.5699937031,1.5369665223  
H,0,-2.7433946958,-7.9429639874,0.0197173884  
N,0,-0.7854343704,-7.3103841237,4.9168391832  
O,0,-0.9540716304,-8.033128443,4.0914479069  
O,0,-0.5736135396,-6.7375568559,5.8484440617  
F,0,-4.940124909,-7.3887159653,7.1462168667  
B,0,-4.6810560777,-7.4514590846,5.7945988752  
F,0,-5.3968332425,-6.4738382264,5.139708079  
F,0,-3.324140581,-7.2561027165,5.5859012503  
F,0,-5.034790392,-8.6920552684,5.3105896203

### Pi Complex NO2BF4 PCM ONIOM 2.795\_93851

ONIOM(M062X/6-311G\*:PM3)  
E(RPM3) = 0.268316105542

Zero-point correction= 0.157802 (Hartree/Particle)  
Thermal correction to Energy= 0.174782  
Thermal correction to Enthalpy= 0.175726  
Thermal correction to Gibbs Free Energy= 0.108435  
Sum of electronic and ZPE= -476.889149  
Sum of electronic and thermal Energies= -476.872169  
Sum of electronic and thermal Enthalpies= -476.871224  
Sum of electronic and thermal Free Energies= -476.938516

E CV S  
KCal/Mol Cal/Mol-K Cal/Mol-K  
Total 109.678 55.717 141.627

C,0,1.347760806,-0.5762478335,1.5557316277  
C,0,2.7425629374,-0.5942989719,1.487052328  
C,0,3.4064418514,0.3005184172,0.6587833783  
C,0,2.7003101839,1.2387581225,-0.1072292925  
C,0,1.3071376516,1.2574268087,-0.0190653006  
C,0,0.6314423836,0.3574772357,0.8013047783  
C,0,3.438373884,2.1916035123,-1.0063327401  
H,0,0.8235860863,-1.2653170008,2.2087304888  
H,0,3.305643287,-1.3057284057,2.0794609682  
H,0,4.4900662466,0.2798199451,0.6032264239  
H,0,0.7426696782,1.9818396914,-0.5965909224  
H,0,-0.4540764753,0.3900656671,0.8615675164  
H,0,2.7694937155,2.9448551827,-1.4218984795  
H,0,3.9044816951,1.655536923,-1.8371113743  
H,0,4.2351940836,2.701263885,-0.4613565095  
N,0,1.1786610847,-1.9395106045,-0.8790110929  
O,0,0.3864596141,-2.6141824957,-0.4879993878  
O,0,1.9737157124,-1.3592421635,-1.3894902906  
F,0,-2.80662585,-0.6395619191,0.7695927324  
B,0,-3.4256650692,0.3159077503,-0.0100319235  
F,0,-2.4749889724,1.0465617617,-0.6925512263  
F,0,-4.2557959631,-0.3069791767,-0.919230792  
F,0,-4.1669685712,1.1562336685,0.7935110902

### Pi Complex NO2BF4 PCM ONIOM 2.805\_94148

ONIOM(M062X/6-311G\*:PM3)  
E(RPM3) = 0.273196595396

Zero-point correction= 0.157623 (Hartree/Particle)  
 Thermal correction to Energy= 0.174656  
 Thermal correction to Enthalpy= 0.175600  
 Thermal correction to Gibbs Free Energy= 0.108064  
 Sum of electronic and ZPE= -476.891929  
 Sum of electronic and thermal Energies= -476.874896  
 Sum of electronic and thermal Enthalpies= -476.873952  
 Sum of electronic and thermal Free Energies= -476.941488

| E             | CV        | S         |
|---------------|-----------|-----------|
| KCal/Mol      | Cal/Mol-K | Cal/Mol-K |
| Total 109.598 | 55.835    | 142.142   |

C,0,2.4450375713,-2.3021044858,-0.220467116  
 C,0,3.224269275,-1.3603091138,-0.8940048413  
 C,0,4.466557246,-1.0017681909,-0.3878025232  
 C,0,4.9661254448,-1.5795419436,0.788870782  
 C,0,4.1864810941,-2.5334036288,1.4445607904  
 C,0,2.9338527521,-2.8914302653,0.9502211594  
 C,0,6.3079115558,-1.1609826268,1.323338292  
 H,0,1.4762951271,-2.5921743628,-0.6121571215  
 H,0,2.8598567198,-0.9077086017,-1.8087304075  
 H,0,5.0665725593,-0.2633892673,-0.9101774215  
 H,0,4.5570841345,-2.9975660853,2.3523069948  
 H,0,2.3416583977,-3.637249014,1.4694086814  
 H,0,7.0767558479,-1.2522769419,0.5535528641  
 H,0,6.6041235488,-1.767692277,2.1785963556  
 H,0,6.2878520969,-0.1146547896,1.6389523262  
 N,0,1.7079839606,-0.4563817864,1.7599557816  
 O,0,0.6833509713,-0.8799334321,1.8539801683  
 O,0,2.6787423046,0.0800234823,1.748496263  
 F,0,1.4890201512,1.8847465083,5.6364305397  
 B,0,0.689060757,2.2545335404,4.5768400737  
 F,0,-0.636961972,2.1567534386,4.9376337251  
 F,0,0.9781176393,3.5498513216,4.2067720124  
 F,0,0.9317649171,1.4082190218,3.5076030841

### Pi Complex NO<sub>2</sub>BF<sub>4</sub> PCM ONIOM 2.807\_94201

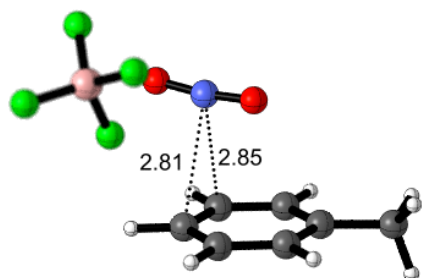

ONIOM(M062X/6-311G\*:PM3)  
 E(RPM3) = 0.268383408515

Zero-point correction= 0.157436 (Hartree/Particle)  
 Thermal correction to Energy= 0.174783  
 Thermal correction to Enthalpy= 0.175727  
 Thermal correction to Gibbs Free Energy= 0.104068  
 Sum of electronic and ZPE= -476.888647  
 Sum of electronic and thermal Energies= -476.871301  
 Sum of electronic and thermal Enthalpies= -476.870357  
 Sum of electronic and thermal Free Energies= -476.942016

| E             | CV        | S         |
|---------------|-----------|-----------|
| KCal/Mol      | Cal/Mol-K | Cal/Mol-K |
| Total 109.678 | 55.878    | 150.819   |

C,0,1.873814788,0.5117575716,-1.7021996179  
 C,0,2.9561232409,1.2134945715,-1.1610525461  
 C,0,3.7835373517,0.6064681601,-0.2187959318  
 C,0,3.543657847,-0.7022145376,0.2042091516  
 C,0,2.4545638927,-1.3930415524,-0.3448411546  
 C,0,1.6313275716,-0.8002125816,-1.2941861857  
 C,0,4.4420531758,-1.3753020171,1.2052965178  
 H,0,1.2381952537,0.9793060764,-2.4464061252  
 H,0,3.159689679,2.2283105123,-1.48537368  
 H,0,4.6234478746,1.1569032465,0.1913046573  
 H,0,2.2560535838,-2.4099979211,-0.0216549767  
 H,0,0.7982698074,-1.3541459128,-1.7113606633  
 H,0,5.0560754068,-0.6513018856,1.7408820684  
 H,0,5.1125937686,-2.0744119395,0.6987083924  
 H,0,3.8639333214,-1.9474548916,1.9328608197  
 N,0,0.7846749666,1.5886001548,0.6512397611  
 O,0,0.363553945,2.4660497058,0.1142947457  
 O,0,1.1277937306,0.7609272015,1.3038684196  
 F,0,-2.7251870558,-0.7365030981,-0.4729179318  
 B,0,-3.9606345522,-0.5534506728,0.1138996211  
 F,0,-4.1564035647,-1.5160388928,1.082116977  
 F,0,-4.0079490864,0.6967276832,0.6963718115  
 F,0,-4.9442719461,-0.6551569811,-0.8470331303

### Pi Complex NO<sub>2</sub>BF<sub>4</sub> PCM ONIOM 2.813\_93970

ONIOM(M062X/6-311G\*:PM3)  
 E(RPM3) = 0.266398676533

Zero-point correction= 0.157694 (Hartree/Particle)  
 Thermal correction to Energy= 0.174883  
 Thermal correction to Enthalpy= 0.175828  
 Thermal correction to Gibbs Free Energy= 0.106798  
 Sum of electronic and ZPE= -476.888807  
 Sum of electronic and thermal Energies= -476.871617  
 Sum of electronic and thermal Enthalpies= -476.870673  
 Sum of electronic and thermal Free Energies= -476.939703

| E             | CV        | S         |
|---------------|-----------|-----------|
| KCal/Mol      | Cal/Mol-K | Cal/Mol-K |
| Total 109.741 | 55.760    | 145.286   |

C,0,-1.3811038169,-4.2686842653,4.6316795158  
 C,0,-0.0715271929,-4.5105334915,4.2050757943  
 C,0,0.7370011936,-5.3907133941,4.9124893438  
 C,0,0.2613162061,-6.0495065892,6.0535232375  
 C,0,-1.0515766272,-5.8054621194,6.4648398038  
 C,0,-1.8704447064,-4.9264889573,5.7608446593  
 C,0,1.1529181978,-6.9998117506,6.804681916  
 H,0,-2.0194156132,-3.5905392072,4.0759453304  
 H,0,0.3097891837,-4.0147734153,3.3198373176  
 H,0,1.7538967059,-5.5731744219,4.5800668683  
 H,0,-1.4391657594,-6.3030328213,7.3494658783  
 H,0,-2.8892176797,-4.7547012789,6.0944124127  
 H,0,0.6657846625,-7.3795337909,7.7024011079

H,0,2.0836437477,-6.5099968645,7.0989940149  
 H,0,1.4193785124,-7.8521288597,6.1753702084  
 N,0,-0.2422505678,-2.4729287383,6.4745034811  
 O,0,0.3970156857,-3.2144421271,6.99264606  
 O,0,-0.82948522,-1.6392426891,6.033498154  
 F,0,-2.870880678,-5.7078614558,9.4944408483  
 B,0,-4.1651132415,-5.2465790242,9.3677683727  
 F,0,-5.0167306629,-6.3119680973,9.1650054047  
 F,0,-4.524984347,-4.5788567831,10.5202050536  
 F,0,-4.2456150826,-4.3805312581,8.2961575167

Pi Complex NO2BF4 PCM ONIOM 2.814\_93946  
 file  
 E(RPM3) = 0.267813568592

Zero-point correction= 0.157317 (Hartree/Particle)  
 Thermal correction to Energy= 0.173840  
 Thermal correction to Enthalpy= 0.174784  
 Thermal correction to Gibbs Free Energy= 0.106756  
 Sum of electronic and ZPE= -476.888899  
 Sum of electronic and thermal Energies= -476.872376  
 Sum of electronic and thermal Enthalpies= -476.871432  
 Sum of electronic and thermal Free Energies= -476.939460

| E             | CV        | S         |
|---------------|-----------|-----------|
| KCal/Mol      | Cal/Mol-K | Cal/Mol-K |
| Total 109.086 | 53.899    | 143.177   |

### Pi Complex NO2BF4 PCM ONIOM 2.815\_94069

ONIOM(M062X/6-311G\*:PM3)  
 E(RPM3) = 0.267668627983

Zero-point correction= 0.157398 (Hartree/Particle)  
 Thermal correction to Energy= 0.174685  
 Thermal correction to Enthalpy= 0.175629  
 Thermal correction to Gibbs Free Energy= 0.105358  
 Sum of electronic and ZPE= -476.888658  
 Sum of electronic and thermal Energies= -476.871371  
 Sum of electronic and thermal Enthalpies= -476.870427  
 Sum of electronic and thermal Free Energies= -476.940698

| E             | CV        | S         |
|---------------|-----------|-----------|
| KCal/Mol      | Cal/Mol-K | Cal/Mol-K |
| Total 109.617 | 55.909    | 147.898   |

C,0,4.3896506802,0.1122259262,-3.1759287026  
 C,0,4.4906212256,1.3444832472,-2.522007904  
 C,0,4.9880967259,1.4083878875,-1.2224096389  
 C,0,5.3838045163,0.2503839446,-0.5506908931  
 C,0,5.2852086509,-0.9769607026,-1.221242538  
 C,0,4.7997362678,-1.0490068879,-2.521109208  
 C,0,5.8833757421,0.3060796078,0.866715993  
 H,0,4.0163588666,0.0632116878,-4.1927630134  
 H,0,4.1949120624,2.2540824567,-3.0335954836  
 H,0,5.0676947261,2.3696224836,-0.7258729185  
 H,0,5.594811672,-1.8843284125,-0.7123360169  
 H,0,4.7374789786,-2.0072230798,-3.0235163258  
 H,0,6.1575575769,1.3219892695,1.1511419596

H,0,6.7529344966,-0.3388878933,1.0018995338  
 H,0,5.1102221743,-0.0393487786,1.5586015152  
 N,0,1.9857774073,0.2635020379,-1.7171203884  
 O,0,2.4166545191,-0.1848234216,-0.7999902789  
 O,0,1.4280073491,0.6972830062,-2.5752332235  
 F,0,-2.1621417887,-3.0959941737,1.053236947  
 B,0,-1.2992678299,-2.3429683171,1.8220409637  
 F,0,-0.053430436,-2.9357038152,1.8260940751  
 F,0,-1.2003165579,-1.0741318711,1.2883649683  
 F,0,-1.7762275254,-2.2636247016,3.113345778

### Pi Complex NO2BF4 PCM ONIOM 2.816\_94015

ONIOM(M062X/6-311G\*:PM3)  
 E(RPM3) = 0.268139522516

Zero-point correction= 0.157983 (Hartree/Particle)  
 Thermal correction to Energy= 0.175170  
 Thermal correction to Enthalpy= 0.176115  
 Thermal correction to Gibbs Free Energy= 0.106327  
 Sum of electronic and ZPE= -476.888503  
 Sum of electronic and thermal Energies= -476.871315  
 Sum of electronic and thermal Enthalpies= -476.870371  
 Sum of electronic and thermal Free Energies= -476.940158

| E             | CV        | S         |
|---------------|-----------|-----------|
| KCal/Mol      | Cal/Mol-K | Cal/Mol-K |
| Total 109.921 | 55.714    | 146.881   |

C,0,-1.9113442413,0.7193858841,-1.2652827676  
 C,0,-2.387462751,0.8551293487,0.0433273605  
 C,0,-3.2057672665,-0.1271989007,0.5963030201  
 C,0,-3.5703749947,-1.2536675291,-0.1441671134  
 C,0,-3.0819798056,-1.3792326774,-1.452059962  
 C,0,-2.2562946223,-0.4095784881,-2.0080230852  
 C,0,-4.4823434911,-2.3010727046,0.4328603215  
 H,0,-1.2589117699,1.4748398347,-1.6885735584  
 H,0,-2.1067565789,1.7204111074,0.6343599493  
 H,0,-3.5654756015,-0.0160534951,1.6141082538  
 H,0,-3.3516448721,-2.253420592,-2.0359019315  
 H,0,-1.8811163507,-0.5302863101,-3.0174954483  
 H,0,-4.5047624383,-2.2508993776,1.521472229  
 H,0,-4.1648461935,-3.3023659721,0.1383401373  
 H,0,-5.504563602,-2.161478653,0.0698329916  
 N,0,-4.4417737197,1.9044315182,-1.6225648834  
 O,0,-4.9860692469,0.9394621893,-1.6518528857  
 O,0,-4.0183126028,2.9319026125,-1.6445336521  
 F,0,-7.8610013363,4.1099437352,2.8593632491  
 B,0,-7.9741436719,2.9242578959,2.1641267002  
 F,0,-6.9267811376,2.091754511,2.5022211565  
 F,0,-9.1687830447,2.3127265904,2.4802085977  
 F,0,-7.9325678607,3.1811224723,0.8087195209

### Pi Complex NO2BF4 PCM ONIOM 2.817\_94021

ONIOM(M062X/6-311G\*:PM3)  
 E(RPM3) = 0.268203592412

Zero-point correction= 0.157942 (Hartree/Particle)  
 Thermal correction to Energy= 0.175161  
 Thermal correction to Enthalpy= 0.176105  
 Thermal correction to Gibbs Free Energy= 0.106148  
 Sum of electronic and ZPE= -476.888420  
 Sum of electronic and thermal Energies= -476.871201  
 Sum of electronic and thermal Enthalpies= -476.870257  
 Sum of electronic and thermal Free Energies= -476.940213

| E             | CV        | S         |
|---------------|-----------|-----------|
| KCal/Mol      | Cal/Mol-K | Cal/Mol-K |
| Total 109.915 | 55.724    | 147.237   |

C,0,3.2760491936,-0.8879710033,-0.9252048117  
 C,0,2.2043268697,-0.2496363597,-1.5589370835  
 C,0,1.7511707641,0.9837208904,-1.0965064086  
 C,0,2.3489571109,1.5969145511,0.0065970155  
 C,0,3.4250239589,0.948652996,0.6285154259  
 C,0,3.8908708202,-0.2766252934,0.1672399515  
 C,0,1.8422554258,2.9108564716,0.5342851741  
 H,0,3.640677493,-1.8388434413,-1.2972745977  
 H,0,1.734382432,-0.7091003609,-2.4220091395  
 H,0,0.9231223906,1.4740137018,-1.5981261439  
 H,0,3.9034977892,1.4177565709,1.4822166846  
 H,0,4.7306482066,-0.7565926347,0.6558645007  
 H,0,1.2008927357,2.7521931326,1.4058887336  
 H,0,1.2582283221,3.4412695038,-0.2178376725  
 H,0,2.667502227,3.5516654629,0.8480104685  
 N,0,1.0499339812,-1.7008949836,0.5977178075  
 O,0,1.0871192956,-0.8268462671,1.2781476219  
 O,0,0.9208428743,-2.6371133689,0.0125466021  
 F,0,-5.0005164593,0.4792774735,-0.2873208908  
 B,0,-3.7464930501,-0.036602871,-0.038798268  
 F,0,-2.8241960234,0.9891513917,-0.0021562341  
 F,0,-3.7456951429,-0.696090603,1.173258157  
 F,0,-3.4020792148,-0.9231829596,-1.038596893

### Pi Complex NO<sub>2</sub>BF<sub>4</sub> PCM ONIOM 2.819\_94022

ONIOM(M062X/6-311G\*:PM3)  
 E(RPM3) = 0.267271057213

Zero-point correction= 0.157573 (Hartree/Particle)  
 Thermal correction to Energy= 0.174757  
 Thermal correction to Enthalpy= 0.175702  
 Thermal correction to Gibbs Free Energy= 0.106144  
 Sum of electronic and ZPE= -476.888792  
 Sum of electronic and thermal Energies= -476.871608  
 Sum of electronic and thermal Enthalpies= -476.870664  
 Sum of electronic and thermal Free Energies= -476.940221

| E             | CV        | S         |
|---------------|-----------|-----------|
| KCal/Mol      | Cal/Mol-K | Cal/Mol-K |
| Total 109.662 | 55.771    | 146.396   |

C,0,-1.7669860373,0.4379928849,1.6813675992  
 C,0,-3.0153314954,0.0062482909,1.2245687699  
 C,0,-3.1001829349,-1.0275335024,0.2949122615  
 C,0,-1.9479003126,-1.6401644101,-0.2015521695  
 C,0,-0.7023213921,-1.1991180727,0.2672328894

C,0,-0.6088157943,-0.1786269339,1.2045144449  
 C,0,-2.0234437407,-2.7452911915,-1.2188090827  
 H,0,-1.7003728637,1.23199539,2.4168393272  
 H,0,-3.9201419983,0.467702076,1.6043163848  
 H,0,-4.0731878369,-1.3599304664,-0.0502209435  
 H,0,0.205788699,-1.661635886,-0.1107780456  
 H,0,0.3652847634,0.1440708097,1.558072643  
 H,0,-1.5320065784,-2.4499082547,-2.1490320281  
 H,0,-3.0560947605,-3.0076994047,-1.447258038  
 H,0,-1.5145039131,-3.6397941972,-0.8538188721  
 N,0,-1.9969710108,1.9227085129,-0.7046033113  
 O,0,-2.2815234095,2.8371142972,-0.1404157681  
 O,0,-1.7114470382,1.091239348,-1.3786611424  
 F,0,2.6861565892,-0.7453013892,-0.6569787702  
 B,0,3.4730834042,0.1745371517,0.0045722384  
 F,0,4.1018117035,0.9855656127,-0.9180640671  
 F,0,2.688280302,0.9531850241,0.8305171315  
 F,0,4.4190016557,-0.4873166893,0.7588895488

### Pi Complex NO<sub>2</sub>BF<sub>4</sub> PCM ONIOM 2.820\_94089

ONIOM(M062X/6-311G\*:PM3)  
 E(RPM3) = 0.275441117371

Zero-point correction= 0.158223 (Hartree/Particle)  
 Thermal correction to Energy= 0.175036  
 Thermal correction to Enthalpy= 0.175980  
 Thermal correction to Gibbs Free Energy= 0.110581  
 Sum of electronic and ZPE= -476.893256  
 Sum of electronic and thermal Energies= -476.876444  
 Sum of electronic and thermal Enthalpies= -476.875499  
 Sum of electronic and thermal Free Energies= -476.940898

| E             | CV        | S         |
|---------------|-----------|-----------|
| KCal/Mol      | Cal/Mol-K | Cal/Mol-K |
| Total 109.837 | 55.662    | 137.644   |

C,0,-1.7803215185,-2.8794586443,-0.9005922701  
 C,0,-0.5932532638,-2.1544925873,-0.9841913274  
 C,0,0.4640225373,-2.4553342156,-0.133360647  
 C,0,0.3696833321,-3.4907065767,0.8070579329  
 C,0,-0.8177635402,-4.2221032636,0.8720486863  
 C,0,-1.8868411642,-3.9201280366,0.0306266019  
 C,0,1.5310657496,-3.8122068412,1.7066259892  
 H,0,-2.6094680604,-2.6541347282,-1.5614931365  
 H,0,-0.4969799183,-1.35110102,-1.7044633195  
 H,0,1.3802879272,-1.8770900598,-0.1926584416  
 H,0,-0.9234897264,-5.0160419145,1.6063202045  
 H,0,-2.8041282221,-4.4953191013,0.0990740254  
 H,0,1.2139336841,-4.3903385982,2.5747448124  
 H,0,2.0240582743,-2.9035100024,2.0552506985  
 H,0,2.2753484407,-4.4025662855,1.1660015748  
 N,0,-2.5781445619,-1.6674288805,1.5185570862  
 O,0,-1.5404816069,-1.4286397765,1.8307954969  
 O,0,-3.6690661858,-1.7802372972,1.3253234875  
 F,0,-2.7362807383,-3.6172676554,3.2601699494  
 B,0,-3.0061134653,-4.7099738941,4.0703110703  
 F,0,-2.1123288543,-5.7211666496,3.7960486373  
 F,0,-2.8894800577,-4.3296578373,5.3894519415  
 F,0,-4.2900055613,-5.1444231342,3.823409547

### Pi Complex NO<sub>2</sub>BF<sub>4</sub> PCM ONIOM 2.822\_94104

ONIOM(M062X/6-311G\*:PM3)  
E(RPM3) = 0.275424085266

Zero-point correction= 0.158171 (Hartree/Particle)  
Thermal correction to Energy= 0.175004  
Thermal correction to Enthalpy= 0.175949  
Thermal correction to Gibbs Free Energy= 0.110430  
Sum of electronic and ZPE= -476.893308  
Sum of electronic and thermal Energies= -476.876474  
Sum of electronic and thermal Enthalpies= -476.875530  
Sum of electronic and thermal Free Energies= -476.941048

| E             | CV        | S         |
|---------------|-----------|-----------|
| KCal/Mol      | Cal/Mol-K | Cal/Mol-K |
| Total 109.817 | 55.681    | 137.895   |

C,0,-2.6552057332,0.7733503251,-1.3523827499  
C,0,-1.7921262722,0.4414896821,-0.3004737562  
C,0,-1.070800904,1.4362037102,0.3570584502  
C,0,-1.1891729967,2.7737897937,-0.0251425435  
C,0,-2.0602100957,3.0918555955,-1.0764650335  
C,0,-2.792271528,2.1074738352,-1.7302746907  
C,0,-0.4198839836,3.8554175132,0.6817531625  
H,0,-3.2241100365,-0.0010986385,-1.8540151861  
H,0,-1.6828529828,-0.5934291842,0.0060350486  
H,0,-0.3871292606,1.1613374935,1.1557015057  
H,0,-2.1595714093,4.1272277223,-1.385604238  
H,0,-3.4611509871,2.3771609321,-2.5385852632  
H,0,-0.0527163013,4.6035935602,-0.022338615  
H,0,0.4298388499,3.4468187824,1.2289592785  
H,0,-1.0639735202,4.369073867,1.4001194436  
N,0,-0.0941434094,0.5028921097,-2.5081823083  
O,0,0.1381957321,1.5850196077,-2.4293601441  
O,0,-0.1955546064,-0.587389426,-2.7109386673  
F,0,1.5258428282,-0.0670363025,-0.5306228491  
B,0,2.2671627789,-0.5845943612,0.5208923693  
F,0,3.598505616,-0.294796773,0.3160164344  
F,0,1.8445552004,-0.0225861251,1.7049812524  
F,0,2.0898942215,-1.9501535195,0.5646359999

### Pi Complex NO<sub>2</sub>BF<sub>4</sub> PCM ONIOM 2.822\_94188

ONIOM(M062X/6-311G\*:PM3)  
E(RPM3) = 0.267726128048

Zero-point correction= 0.157544 (Hartree/Particle)  
Thermal correction to Energy= 0.174996  
Thermal correction to Enthalpy= 0.175940  
Thermal correction to Gibbs Free Energy= 0.104331  
Sum of electronic and ZPE= -476.888670  
Sum of electronic and thermal Energies= -476.871218  
Sum of electronic and thermal Enthalpies= -476.870274  
Sum of electronic and thermal Free Energies= -476.941883

| E | CV | S |
|---|----|---|
|---|----|---|

| KCal/Mol      | Cal/Mol-K | Cal/Mol-K |
|---------------|-----------|-----------|
| Total 109.812 | 55.863    | 150.715   |

C,0,3.2546528065,-0.8646636491,1.0061630731  
C,0,3.926618121,-0.1942293588,-0.0172370727  
C,0,3.4198036664,1.0011001989,-0.5107299886  
C,0,2.245254521,1.5619974258,0.0109206889  
C,0,1.590913342,0.8920957844,1.0461039597  
C,0,2.0858029413,-0.3135651476,1.5402195591  
C,0,1.7165545894,2.8565435186,-0.5431426377  
H,0,3.6480451498,-1.7945381462,1.4017817563  
H,0,4.8401816432,-0.6072665678,-0.4283936546  
H,0,3.9397792787,1.5146769924,-1.3132721829  
H,0,0.6842580923,1.3127974974,1.4681129899  
H,0,1.5690912282,-0.8188899774,2.3491580921  
H,0,2.4553150509,3.6528623975,-0.4292037527  
H,0,0.8022222222,3.1636450852,-0.0361825585  
H,0,1.5023563495,2.7628015444,-1.6103429619  
N,0,1.285718981,-1.8085070817,-0.7828164861  
O,0,1.2995618386,-0.8971554651,-1.4128621731  
O,0,1.1986888377,-2.7824849799,-0.2544809637  
F,0,-4.1481838419,0.9584212382,1.0746439388  
B,0,-3.8456818419,0.0832959238,0.0525796099  
F,0,-4.812781048,-0.8979095633,-0.0156454424  
F,0,-3.7972362994,0.7684838918,-1.1437891636  
F,0,-2.6194316283,-0.5018935616,0.2942723707

### Pi Complex NO<sub>2</sub>BF<sub>4</sub> PCM ONIOM 2.823\_94179

ONIOM(M062X/6-311G\*:PM3)  
E(RPM3) = 0.267244082575

Zero-point correction= 0.157383 (Hartree/Particle)  
Thermal correction to Energy= 0.174822  
Thermal correction to Enthalpy= 0.175766  
Thermal correction to Gibbs Free Energy= 0.104208  
Sum of electronic and ZPE= -476.888618  
Sum of electronic and thermal Energies= -476.871179  
Sum of electronic and thermal Enthalpies= -476.870235  
Sum of electronic and thermal Free Energies= -476.941792

| E             | CV        | S         |
|---------------|-----------|-----------|
| KCal/Mol      | Cal/Mol-K | Cal/Mol-K |
| Total 109.702 | 55.858    | 150.605   |

C,0,5.1962954816,-4.9741735147,-0.3333115929  
C,0,5.6964274127,-5.0082118601,0.9663022195  
C,0,4.9794947648,-5.6535887151,1.9701445209  
C,0,3.7616064888,-6.2847424811,1.6976827004  
C,0,3.2749848288,-6.2557174392,0.3857246327  
C,0,3.9794477751,-5.6051988453,-0.6210607552  
C,0,2.9836762095,-6.9818068164,2.7801027777  
H,0,5.7535338433,-4.4816073619,-1.1224823926  
H,0,6.6416147604,-4.5308582546,1.1972870011  
H,0,5.3714606535,-5.6699367689,2.9816481287  
H,0,2.3358207151,-6.7482557007,0.1542400177  
H,0,3.592701886,-5.5982287897,-1.6344532944  
H,0,2.8107101434,-8.0274753402,2.5169120983  
H,0,2.0050759491,-6.5155110348,2.9168908484  
H,0,3.5116943464,-6.9519649429,3.732939509

N,0,3.3299907571,-2.9653886026,0.3393799282  
 O,0,3.4320901798,-2.476137967,-0.65290943  
 O,0,3.1620544064,-3.3498508795,1.3644938649  
 F,0,-1.203758783,-1.5288416203,2.6860683039  
 B,0,-0.7345048538,-0.2461215523,2.8810189461  
 F,0,-1.0002926669,0.1505328977,4.1746525952  
 F,0,0.6278037004,-0.2191452177,2.6626697212  
 F,0,-1.3562617984,0.6101134072,1.9963818511

### Pi Complex NO<sub>2</sub>BF<sub>4</sub> PCM ONIOM 2.825\_94068

ONIOM(M062X/6-311G\*:PM3)  
 E(RPM3) = 0.267928869545

Zero-point correction= 0.157468 (Hartree/Particle)  
 Thermal correction to Energy= 0.174778  
 Thermal correction to Enthalpy= 0.175722  
 Thermal correction to Gibbs Free Energy= 0.105604  
 Sum of electronic and ZPE= -476.888824  
 Sum of electronic and thermal Energies= -476.871515  
 Sum of electronic and thermal Enthalpies= -476.870570  
 Sum of electronic and thermal Free Energies= -476.940688

| E             | CV        | S         |
|---------------|-----------|-----------|
| KCal/Mol      | Cal/Mol-K | Cal/Mol-K |
| Total 109.675 | 55.867    | 147.576   |

C,0,1.2129154822,-1.1160866734,-0.5547356792  
 C,0,1.2127612146,-0.9611828235,-1.9411008125  
 C,0,2.1377672381,-0.1172907274,-2.5437130774  
 C,0,3.0873667784,0.5795280065,-1.7840138823  
 C,0,3.0889957467,0.4046072016,-0.3987514585  
 C,0,2.1594070629,-0.4324406793,0.2149706438  
 C,0,4.0649531303,1.5059767289,-2.4536176572  
 H,0,0.5017530644,-1.7818825872,-0.078046863  
 H,0,0.4923486348,-1.4978610166,-2.5469866574  
 H,0,2.1303650658,0.0050341866,-3.6220090228  
 H,0,3.8229293096,0.926450037,0.2064049253  
 H,0,2.1806116697,-0.5656885873,1.291413887  
 H,0,3.5734517366,2.439334642,-2.7415063965  
 H,0,4.4694587227,1.0571782127,-3.362274087  
 H,0,4.8947298812,1.7547275656,-1.7922114383  
 N,0,-0.0130906241,1.3964286037,-0.147145753  
 O,0,0.4762011433,1.8694609155,-1.0220280423  
 O,0,-0.5864354731,1.0323298985,0.7322539881  
 F,0,1.561611813,5.4233090971,4.3895379179  
 B,0,1.1007633187,4.134316172,4.222939407  
 F,0,0.617052881,3.6561396875,5.4225444849  
 F,0,0.0894250277,4.1255966473,3.2839806865  
 F,0,2.1329203755,3.3280201922,3.788785287

### Pi Complex NO<sub>2</sub>BF<sub>4</sub> PCM ONIOM 2.826\_94040

ONIOM(M062X/6-311G\*:PM3)  
 E(RPM3) = 0.267424826797

Zero-point correction= 0.157669 (Hartree/Particle)  
 Thermal correction to Energy= 0.174927

Thermal correction to Enthalpy= 0.175871  
 Thermal correction to Gibbs Free Energy= 0.105825  
 Sum of electronic and ZPE= -476.888564  
 Sum of electronic and thermal Energies= -476.871307  
 Sum of electronic and thermal Enthalpies= -476.870362  
 Sum of electronic and thermal Free Energies= -476.940409

| E             | CV        | S         |
|---------------|-----------|-----------|
| KCal/Mol      | Cal/Mol-K | Cal/Mol-K |
| Total 109.768 | 55.815    | 147.425   |

C,0,2.2790254593,-0.8668958293,1.5339750338  
 C,0,3.3781850835,-0.9515890772,0.6745066042  
 C,0,3.7157950079,0.1291613466,-0.1375119767  
 C,0,2.9640216687,1.3050785526,-0.1120336271  
 C,0,1.8682189355,1.3787955488,0.7595695677  
 C,0,1.5297192638,0.3102374359,1.5798090349  
 C,0,3.309030047,2.4747700563,-0.9923642893  
 H,0,2.0238416631,-1.7023400453,2.1766338681  
 H,0,3.9778105666,-1.8547864576,0.6500417823  
 H,0,4.5716492362,0.0557560208,-0.7997908218  
 H,0,1.2768909519,2.2886395125,0.7905408393  
 H,0,0.6829510458,0.3883430893,2.2519207369  
 H,0,2.4608527827,2.7486455889,-1.6239751922  
 H,0,4.1591052057,2.2518192141,-1.6366793884  
 H,0,3.5590928304,3.3496821134,-0.3880762362  
 N,0,1.0603101478,-1.6471592148,-0.8937365881  
 O,0,1.0309957966,-0.62685003,-1.3247052358  
 O,0,1.0150440374,-2.7096291945,-0.5708595044  
 F,0,-3.1858068998,-0.7624580371,-0.6301259266  
 B,0,-3.9624193907,0.1889397744,-0.0003532794  
 F,0,-4.9040190038,-0.4370674067,0.7890945535  
 F,0,-3.1579192064,0.9858342371,0.7878057675  
 F,0,-4.5937852292,0.9663218018,-0.948431722

### Pi Complex NO<sub>2</sub>BF<sub>4</sub> PCM ONIOM 2.829\_94116

ONIOM(M062X/6-311G\*:PM3)  
 E(RPM3) = 0.266959365789

Zero-point correction= 0.157261 (Hartree/Particle)  
 Thermal correction to Energy= 0.174598  
 Thermal correction to Enthalpy= 0.175542  
 Thermal correction to Gibbs Free Energy= 0.105096  
 Sum of electronic and ZPE= -476.888998  
 Sum of electronic and thermal Energies= -476.871661  
 Sum of electronic and thermal Enthalpies= -476.870717  
 Sum of electronic and thermal Free Energies= -476.941163

| E             | CV        | S         |
|---------------|-----------|-----------|
| KCal/Mol      | Cal/Mol-K | Cal/Mol-K |
| Total 109.562 | 55.895    | 148.266   |

C,0,-5.145308933,-1.5654408088,2.5439999621  
 C,0,-4.2805325104,-2.6599197471,2.5475041775  
 C,0,-4.6147720562,-3.8091520978,1.8409282637  
 C,0,-5.805971514,-3.8877998927,1.1075798322  
 C,0,-6.6563168283,-2.7795952987,1.0971926514  
 C,0,-6.3351536829,-1.6280680397,1.8113188849  
 C,0,-6.1667007474,-5.149727184,0.3731473693

H,0,-4.8858919032,-0.662414665,3.0855366972  
 H,0,-3.3502796072,-2.6141335772,3.1018224475  
 H,0,-3.9426773226,-4.6611864806,1.8518499157  
 H,0,-7.5771402574,-2.8177744502,0.524699499  
 H,0,-7.0004507501,-0.7719626754,1.7852089065  
 H,0,-6.6296546558,-5.8692873433,1.0544073413  
 H,0,-5.2812623642,-5.6246863795,-0.0511617187  
 H,0,-6.8741594984,-4.9519603634,-0.4322324813  
 N,0,-6.8986959108,-2.8202246035,4.3762619749  
 O,0,-6.7530632123,-3.8350038235,3.9557453642  
 O,0,-7.1130267834,-1.8616726367,4.8955137106  
 F,0,-7.045775378,-3.9865511185,8.6891262446  
 B,0,-6.3351899341,-5.0027627844,9.294789567  
 F,0,-5.708738386,-4.5167989184,10.4229543077  
 F,0,-7.1982311306,-6.0203034696,9.6436812726  
 F,0,-5.3882361339,-5.4847593419,8.4144616098

### Pi Complex NO2BF4 PCM ONIOM 2.830\_93763

ONIOM(M062X/6-311G\*:PM3)  
 E(RPM3) = 0.267872230542

Zero-point correction= 0.158479 (Hartree/Particle)  
 Thermal correction to Energy= 0.175066  
 Thermal correction to Enthalpy= 0.176010  
 Thermal correction to Gibbs Free Energy= 0.110018  
 Sum of electronic and ZPE= -476.889169  
 Sum of electronic and thermal Energies= -476.872582  
 Sum of electronic and thermal Enthalpies= -476.871638  
 Sum of electronic and thermal Free Energies= -476.937630

| E             | CV        | S         |
|---------------|-----------|-----------|
| KCal/Mol      | Cal/Mol-K | Cal/Mol-K |
| Total 109.855 | 55.295    | 138.892   |

C,0,-1.0485546681,-2.9668563538,-2.9448666132  
 C,0,-0.5877366179,-4.1806214114,-2.4424011519  
 C,0,-0.2190945412,-4.284478622,-1.1037837665  
 C,0,-0.3152588617,-3.1891842952,-0.2379616737  
 C,0,-0.7923466484,-1.9778946867,-0.7506376084  
 C,0,-1.1530227387,-1.8626912037,-2.0889674824  
 C,0,0.0748239302,-3.2980099046,1.2081705268  
 H,0,-1.3461803234,-2.8798586104,-3.9837091886  
 H,0,-0.510924343,-5.0440841207,-3.0924725072  
 H,0,0.1478181397,-5.2311274791,-0.7215891115  
 H,0,-0.8804123239,-1.1188452774,-0.0932641402  
 H,0,-1.5271251644,-0.917905484,-2.4682786715  
 H,0,-0.7923429506,-3.1278399841,1.8503324649  
 H,0,0.8344035642,-2.5378173231,1.4802979493  
 H,0,0.4761818572,-4.2843189531,1.4394048287  
 N,0,1.5440533851,-1.8325066096,-2.9870770711  
 O,0,1.313020159,-1.1522081475,-3.8354385837  
 O,0,1.9069521947,-2.4824127016,-2.1670503173  
 F,0,3.782330145,-1.8691106323,0.9073327644  
 B,0,3.3240727208,-1.2632353682,2.0584376823  
 F,0,3.7837094735,-1.9530867917,3.1596084828  
 F,0,3.7789575664,0.0380359198,2.101905533  
 F,0,1.9417630454,-1.2633207596,2.0571953547

### Pi Complex NO2BF4 PCM ONIOM 2.830\_94055

ONIOM(M062X/6-311G\*:PM3)  
 E(RPM3) = 0.266919255288

Zero-point correction= 0.157858 (Hartree/Particle)  
 Thermal correction to Energy= 0.175081  
 Thermal correction to Enthalpy= 0.176025  
 Thermal correction to Gibbs Free Energy= 0.105506  
 Sum of electronic and ZPE= -476.888207  
 Sum of electronic and thermal Energies= -476.870984  
 Sum of electronic and thermal Enthalpies= -476.870040  
 Sum of electronic and thermal Free Energies= -476.940558

| E             | CV        | S         |
|---------------|-----------|-----------|
| KCal/Mol      | Cal/Mol-K | Cal/Mol-K |
| Total 109.865 | 55.755    | 148.419   |

C,0,1.9625589494,-6.6026972739,0.43725645  
 C,0,2.1016661087,-6.8254354138,1.8107989662  
 C,0,1.1693010501,-6.3015804574,-2.702038984  
 C,0,0.0888934273,-5.543489451,2.2435344834  
 C,0,-0.0434695955,-5.3357360536,0.8641937277  
 C,0,0.8776555142,-5.8620131128,-0.0334784517  
 C,0,-0.8972968706,-4.936137235,3.2028394124  
 H,0,2.6790847432,-7.0260032511,-0.2579933052  
 H,0,2.9291062482,-7.4208016028,2.1808781227  
 H,0,1.282774766,-6.4840820432,3.7654993205  
 H,0,-0.8815770363,-4.7535097391,0.4944337203  
 H,0,0.7530312695,-5.6959509787,-1.0973595131  
 H,0,-0.8900873992,-5.4539194788,4.1619824209  
 H,0,-1.9097141123,-4.9684199695,2.7980401178  
 H,0,-0.6518329636,-3.8863259914,3.3878396112  
 N,0,3.287948862,-4.2262786185,1.2164681884  
 O,0,4.2650678278,-4.6068033018,0.8483923867  
 O,0,2.3748778829,-3.7334020243,1.6042946049  
 F,0,2.9656704048,1.6683089076,-1.4133419007  
 B,0,2.5911787464,0.8779945419,-0.3471748567  
 F,0,2.0379096285,1.6627078172,0.6428468808  
 F,0,1.6647807988,-0.0535721326,-0.7694761086  
 F,0,3.6992370496,0.2234774626,0.1518438382

### Pi Complex NO2BF4 PCM ONIOM 2.830\_94126

ONIOM(M062X/6-311G\*:PM3)  
 E(RPM3) = 0.275092289408

Zero-point correction= 0.158031 (Hartree/Particle)  
 Thermal correction to Energy= 0.174786  
 Thermal correction to Enthalpy= 0.175731  
 Thermal correction to Gibbs Free Energy= 0.110424  
 Sum of electronic and ZPE= -476.893653  
 Sum of electronic and thermal Energies= -476.876898  
 Sum of electronic and thermal Enthalpies= -476.875954  
 Sum of electronic and thermal Free Energies= -476.941260

| E             | CV        | S         |
|---------------|-----------|-----------|
| KCal/Mol      | Cal/Mol-K | Cal/Mol-K |
| Total 109.680 | 55.684    | 137.448   |

C,0,2.5397801517,-0.8425681992,1.0883839021  
 C,0,3.2780038538,-0.1255860721,0.1523149913  
 C,0,2.7583829954,1.0445675693,-0.3954398034  
 C,0,1.5018730632,1.527414271,-0.014832511  
 C,0,0.7735316391,0.8077229896,0.9378370805  
 C,0,1.2812498916,-0.3669877538,1.4838977392  
 C,0,0.9338904142,2.7877946167,-0.6068194001  
 H,0,2.9380886304,-1.7524372188,1.5223442898  
 H,0,4.2538162567,-0.479934812,-0.1569052041  
 H,0,3.3347008753,1.5910568665,-1.1340047562  
 H,0,-0.2170580731,1.1518832107,1.2277949784  
 H,0,0.6999780795,-0.9151354795,2.2174978235  
 H,0,-0.0605696893,2.6072564547,-1.0234026248  
 H,0,1.5726484277,3.1820804719,-1.3964242772  
 H,0,0.8274930131,3.5564989205,0.1619633431  
 N,0,0.6957243948,-1.8234579492,-0.8216760437  
 O,0,0.4566801065,-2.7465228046,-0.247362658  
 O,0,0.8683776741,-0.9880480776,-1.5305958235  
 F,0,-1.6112283502,-0.7953302085,-0.1012904818  
 B,0,-2.632217863,0.1310427449,0.0553317452  
 F,0,-2.7359123932,0.4865007019,1.3819908976  
 F,0,-2.3556909342,1.2431534867,-0.709035804  
 F,0,-3.814290164,-0.437105729,-0.3671884029

### Pi Complex NO2BF4 PCM ONIOM 2.830\_94144

ONIOM(M062X/6-311G\*:PM3)  
 E(RPM3) = 0.267183559878

Zero-point correction= 0.157622 (Hartree/Particle)  
 Thermal correction to Energy= 0.174950  
 Thermal correction to Enthalpy= 0.175894  
 Thermal correction to Gibbs Free Energy= 0.104563  
 Sum of electronic and ZPE= -476.888383  
 Sum of electronic and thermal Energies= -476.871055  
 Sum of electronic and thermal Enthalpies= -476.870111  
 Sum of electronic and thermal Free Energies= -476.941441

| E             | CV        | S         |
|---------------|-----------|-----------|
| KCal/Mol      | Cal/Mol-K | Cal/Mol-K |
| Total 109.783 | 55.798    | 150.128   |

C,0,2.7772758554,-0.4400459505,-2.7082318387  
 C,0,1.6545784094,0.3253845703,-3.0270894074  
 C,0,1.7892193981,1.4520607064,-3.827994494  
 C,0,3.0383253733,1.8344338587,-4.3380618705  
 C,0,4.1517025179,1.0529217758,-4.0253513921  
 C,0,4.0278458525,-0.073704043,-3.2149989157  
 C,0,3.1602046799,3.0640070707,-5.1954535322  
 H,0,2.6777596047,-1.3254832459,-2.0901907488  
 H,0,0.6791696082,0.0423556805,-2.6485177292  
 H,0,0.9145830054,2.0489389976,-4.0673105596  
 H,0,5.1254586339,1.3277040057,-4.4166439292  
 H,0,4.9017515942,-0.6743886465,-2.9872198526  
 H,0,2.4775844672,3.0107874697,-6.045961549  
 H,0,4.173989321,3.1854918518,-5.576150218  
 H,0,2.8995604788,3.959913796,-4.62627019  
 N,0,3.6889675434,1.4618718201,-0.8203284001  
 O,0,3.3316399594,2.3380501911,-1.3963212551

O,0,4.0738885085,0.6685562685,-0.1436605165  
 F,0,0.2541683816,5.0585469393,0.0025122969  
 B,0,0.528840803,5.2764775793,1.3369173504  
 F,0,0.2540192135,6.5896024592,1.6553224691  
 F,0,-0.2483660494,4.4373656819,2.1084004708  
 F,0,1.86201474,5.0124354632,1.5774429115

### Pi Complex NO2BF4 PCM ONIOM 2.831\_93989

ONIOM(M062X/6-311G\*:PM3)  
 E(RPM3) = 0.266846348776

Zero-point correction= 0.157887 (Hartree/Particle)  
 Thermal correction to Energy= 0.175085  
 Thermal correction to Enthalpy= 0.176029  
 Thermal correction to Gibbs Free Energy= 0.106185  
 Sum of electronic and ZPE= -476.888195  
 Sum of electronic and thermal Energies= -476.870997  
 Sum of electronic and thermal Enthalpies= -476.870053  
 Sum of electronic and thermal Free Energies= -476.939897

| E             | CV        | S         |
|---------------|-----------|-----------|
| KCal/Mol      | Cal/Mol-K | Cal/Mol-K |
| Total 109.867 | 55.753    | 147.000   |

C,0,-3.1405619678,1.0288261601,1.1435492003  
 C,0,-3.7311585696,0.8124401527,-0.1054177457  
 C,0,-3.6419409368,-0.4364156949,-0.7140846683  
 C,0,-2.9597016632,-1.4868625602,-0.0949593145  
 C,0,-2.380486753,-1.258900934,1.1603305967  
 C,0,-2.4718194507,-0.0179769461,1.7792632582  
 C,0,-2.8200630561,-2.8255142055,-0.7659841723  
 H,0,-3.2256544678,1.9965750365,1.6254152223  
 H,0,-4.2732137135,1.6149584036,-0.5934965414  
 H,0,-4.107808408,-0.5961688348,-1.6808284096  
 H,0,-1.8527181927,-2.0682716163,1.6548046837  
 H,0,-2.0231276745,0.1355798626,2.7539598052  
 H,0,-1.8458865969,-2.9058282114,-1.2570083321  
 H,0,-3.588632825,-2.9724007094,-1.5248263995  
 H,0,-2.8882112875,-3.6373770232,-0.0406423486  
 N,0,-0.9205890996,1.4541374785,-0.561506971  
 O,0,-0.7100395256,0.3767263083,-0.7093548762  
 O,0,-1.0213046471,2.5577400482,-0.4785386954  
 F,0,3.4270288679,0.6630400085,-0.7938730352  
 B,0,4.4189420158,0.0458500932,-0.0592499654  
 F,0,5.2358420514,-0.6742416349,-0.9052726385  
 F,0,5.1622930894,1.0028392207,0.5994499208  
 F,0,3.8438198109,-0.8049424022,0.8619484266

### Pi Complex NO2BF4 PCM ONIOM 2.832\_93961

ONIOM(M062X/6-311G\*:PM3)  
 E(RPM3) = 0.266460911868

Zero-point correction= 0.158104 (Hartree/Particle)  
 Thermal correction to Energy= 0.175325  
 Thermal correction to Enthalpy= 0.176269  
 Thermal correction to Gibbs Free Energy= 0.106450



Sum of electronic and ZPE= -476.887956  
 Sum of electronic and thermal Energies= -476.870735  
 Sum of electronic and thermal Enthalpies= -476.869791  
 Sum of electronic and thermal Free Energies= -476.939610

E CV S  
 KCal/Mol Cal/Mol-K Cal/Mol-K  
 Total 110.018 55.653 146.945

C,0,-2.2315135423,1.0212003264,1.4366720426  
 C,0,-3.4033421611,1.003918177,0.6769501569  
 C,0,-3.733326121,-0.1254662852,-0.0644425444  
 C,0,-2.9103790045,-1.2576175291,-0.058530937  
 C,0,-1.7433256113,-1.2303820933,0.7123325469  
 C,0,-1.4044813716,-0.1049727669,1.4566223591  
 C,0,-3.2907454582,-2.4877444846,-0.8362405713  
 H,0,-1.975082175,1.8953014401,2.0255057675  
 H,0,-4.0556431365,1.8695380513,0.6671666131  
 H,0,-4.6419394082,-0.1320354387,-0.6574301694  
 H,0,-1.0949958244,-2.100441649,0.7286929698  
 H,0,-0.5001032363,-0.1031114868,2.0550925187  
 H,0,-3.8527961062,-2.231886571,-1.735139956  
 H,0,-3.9236154919,-3.1370295536,-0.2252034963  
 H,0,-2.4111380822,-3.0632489126,-1.1265903076  
 N,0,-0.8811012393,1.6363201987,-0.9761390869  
 O,0,-1.2446694857,0.7571932077,-1.5434523336  
 O,0,-0.4634450885,2.5547215958,-0.5118057056  
 F,0,3.7540246217,0.8671086944,-0.719199305  
 B,0,3.7679308497,-0.2849554515,0.0404648156  
 F,0,3.4966850426,-1.3674019983,-0.7706190213  
 F,0,5.0067604598,-0.4407445522,0.6249150976  
 F,0,2.8030435707,-0.1960909188,1.0228615466

### Pi Complex NO2BF4 PCM ONIOM 2.832\_94166

ONIOM(M062X/6-311G\*:PM3)  
 E(RPM3) = 0.267253721599

Zero-point correction= 0.157324 (Hartree/Particle)  
 Thermal correction to Energy= 0.174716  
 Thermal correction to Enthalpy= 0.175660  
 Thermal correction to Gibbs Free Energy= 0.104439  
 Sum of electronic and ZPE= -476.888779  
 Sum of electronic and thermal Energies= -476.871387  
 Sum of electronic and thermal Enthalpies= -476.870443  
 Sum of electronic and thermal Free Energies= -476.941664

E CV S  
 KCal/Mol Cal/Mol-K Cal/Mol-K  
 Total 109.636 55.920 149.897

C,0,-1.4033866266,-0.1769968077,2.8513700684  
 C,0,-1.610779403,1.1480783862,3.2382760571  
 C,0,-2.8313514204,1.7600190366,2.9838701182  
 C,0,-3.8739532484,1.0661154674,2.3534227182  
 C,0,-3.6603673981,-0.2628922128,1.9830271069  
 C,0,-2.4357925002,-0.8822483314,2.2257875156  
 C,0,-5.1890284307,1.7499528056,2.0981974402  
 H,0,-0.4551609116,-0.6636113509,3.0518849692  
 H,0,-0.819422532,1.6994103833,3.7327721874

H,0,-2.9869054982,2.7931861456,3.2779949919  
 H,0,-4.4564058357,-0.818212213,1.498445408  
 H,0,-2.2870016454,-1.9175784372,1.9387407794  
 H,0,-5.6824715213,1.9933672869,3.0421164011  
 H,0,-5.8615665533,1.1188408283,1.5177738154  
 H,0,-5.0429441733,2.6874399782,1.5573765363  
 N,0,-1.0902886592,0.5523765275,0.1319378807  
 O,0,-1.8273085594,1.3786486107,0.1788766242  
 O,0,-0.3165699409,-0.2272943831,-0.0359112787  
 F,0,1.9149403985,2.4362466413,-4.884660271  
 B,0,2.3844108375,2.3543978409,-3.5904959877  
 F,0,1.7493583272,3.2997533438,-2.8111016291  
 F,0,2.1224865249,1.0968658962,-3.0864398134  
 F,0,3.7440210698,2.5835375575,-3.5733615385

### Pi Complex NO2BF4 PCM ONIOM 2.833\_94062

ONIOM(M062X/6-311G\*:PM3)  
 E(RPM3) = 0.267888788648

Zero-point correction= 0.157385 (Hartree/Particle)  
 Thermal correction to Energy= 0.174709  
 Thermal correction to Enthalpy= 0.175654  
 Thermal correction to Gibbs Free Energy= 0.105819  
 Sum of electronic and ZPE= -476.889058  
 Sum of electronic and thermal Energies= -476.871734  
 Sum of electronic and thermal Enthalpies= -476.870789  
 Sum of electronic and thermal Free Energies= -476.940624

E CV S  
 KCal/Mol Cal/Mol-K Cal/Mol-K  
 Total 109.632 55.871 146.979

C,0,-5.327080771,-2.3143656504,-1.5331194867  
 C,0,-6.4669353609,-1.5171785636,-1.4319622358  
 C,0,-6.4281494778,-0.3432775333,-0.6896832204  
 C,0,-5.2549781002,0.0681856888,-0.0421377291  
 C,0,-4.1157455839,-0.7298594661,-0.1608346396  
 C,0,-4.1483162956,-1.9137534392,-0.8955691496  
 C,0,-5.2402239513,1.3321163819,0.7727770954  
 H,0,-5.3462343993,-3.2251164011,-2.1211594079  
 H,0,-7.3817937226,-1.811743522,-1.9322462167  
 H,0,-7.3187363139,0.2720820819,-0.61139439  
 H,0,-3.1955333515,-0.4283618848,0.3318348965  
 H,0,-3.251578469,-2.5181320079,-0.9846593818  
 H,0,-5.745061583,2.1429037011,0.2451610074  
 H,0,-4.2218176908,1.6481658606,0.9984533792  
 H,0,-5.7641526878,1.184011118,1.7209485816  
 N,0,-5.5713063036,-3.326076681,1.1020529029  
 O,0,-6.0922492356,-2.4210497546,1.4736228669  
 O,0,-5.0955856771,-4.2991898802,0.8531562987  
 F,0,0.0072686073,-0.5942375954,2.3757495283  
 B,0,-1.0688258119,-1.1757785244,3.0124840044  
 F,0,-1.22351094,-2.4731670678,2.5682209344  
 F,0,-0.8538476634,-1.1783770443,4.3751625563  
 F,0,-2.213687417,-0.4584876162,2.7323169055

### Pi Complex NO2BF4 PCM ONIOM 2.834\_93928

ONIOM(M062X/6-311G\*:PM3)  
E(RPM3) = 0.268482102561

Zero-point correction= 0.158131 (Hartree/Particle)  
Thermal correction to Energy= 0.174916  
Thermal correction to Enthalpy= 0.175860  
Thermal correction to Gibbs Free Energy= 0.109913  
Sum of electronic and ZPE= -476.891068  
Sum of electronic and thermal Energies= -476.874283  
Sum of electronic and thermal Enthalpies= -476.873338  
Sum of electronic and thermal Free Energies= -476.939285

| E             | CV        | S         |
|---------------|-----------|-----------|
| KCal/Mol      | Cal/Mol-K | Cal/Mol-K |
| Total 109.761 | 55.484    | 138.796   |

C,0,0.7726607136,-2.9688934205,-2.1885951502  
C,0,1.6143452466,-2.6817947944,-1.1084418926  
C,0,1.0862277674,-2.5082362421,0.1695875128  
C,0,-0.2884192991,-2.6105370914,0.3881621798  
C,0,-1.1205653723,-2.9053240186,-0.7007064762  
C,0,-0.5996413363,-3.0889396543,-1.9756976249  
C,0,-0.874346561,-2.3942518823,1.7563537112  
H,0,1.1891713792,-3.1197914933,-3.1779142355  
H,0,2.685227827,-2.6066030189,-1.2632707745  
H,0,1.7570349265,-2.2792238209,1.0155475177  
H,0,-2.1900962017,-2.9933534247,-0.5399061782  
H,0,-1.259350441,-3.3231923723,-2.8024627344  
H,0,-1.4295759293,-1.4533020062,1.7933000912  
H,0,-0.0944846797,-2.3562053003,2.5174883091  
H,0,-1.5708247864,-3.1940254582,2.0138595053  
N,0,0.7399610983,-0.1443022503,-1.9492382049  
O,0,-0.1568919619,-0.1412905953,-1.2980689483  
O,0,1.6123753395,0.0023427051,-2.6229071541  
F,0,2.7671297116,-1.9120373437,2.4223244625  
B,0,3.2283815575,-0.6557659741,2.7708228563  
F,0,4.6062155572,-0.6467211504,2.7259209776  
F,0,2.7345025173,0.2756061295,1.8809095153  
F,0,2.802922327,-0.3464883223,4.0446896352

### Pi Complex NO2BF4 PCM ONIOM 2.835\_94109

ONIOM(M062X/6-311G\*:PM3)  
E(RPM3) = 0.267159007656

Zero-point correction= 0.157421 (Hartree/Particle)  
Thermal correction to Energy= 0.174714  
Thermal correction to Enthalpy= 0.175658  
Thermal correction to Gibbs Free Energy= 0.105166  
Sum of electronic and ZPE= -476.888841  
Sum of electronic and thermal Energies= -476.871547  
Sum of electronic and thermal Enthalpies= -476.870603  
Sum of electronic and thermal Free Energies= -476.941096

| E             | CV        | S         |
|---------------|-----------|-----------|
| KCal/Mol      | Cal/Mol-K | Cal/Mol-K |
| Total 109.635 | 55.864    | 148.364   |

C,0,-2.6962157279,-2.9646590894,1.5143892758  
C,0,-2.4958658871,-4.1776110912,0.8579831096  
C,0,-3.5725281401,-5.0276116268,0.626648461  
C,0,-4.8673388661,-4.6830455391,1.0323165277  
C,0,-5.0592265979,-3.4569621733,1.6757349329  
C,0,-3.9863450582,-2.604982258,1.9205375527  
C,0,-6.0221909665,-5.619705704,0.8054262567  
H,0,-1.8635386352,-2.2920546635,1.6880077417  
H,0,-1.5030609911,-4.4593800371,0.5274648085  
H,0,-3.4095753126,-5.972576747,0.1188241061  
H,0,-6.0573400168,-3.1670878341,1.987985907  
H,0,-4.1533406695,-1.6532078066,2.4134239336  
H,0,-5.8313846619,-6.2875417562,-0.0348464835  
H,0,-6.9433088263,-5.0696708012,0.6099079028  
H,0,-6.1911350664,-6.2400813607,1.6902751698  
N,0,-2.9229472051,-4.2360195779,4.0387073081  
O,0,-3.4094910624,-5.1432117272,3.6295131101  
O,0,-2.4212642766,-3.3911080112,4.5568008692  
F,0,-5.5273049145,-4.2254290893,7.7893267269  
B,0,-6.0238794675,-5.4242292627,8.2592909184  
F,0,-5.3524612497,-5.7776413161,9.4108782902  
F,0,-7.3697716081,-5.2904258548,8.527675438  
F,0,-5.8392989927,-6.4005250725,7.3017801366

### Pi Complex NO2BF4 PCM ONIOM 2.838\_93889

ONIOM(M062X/6-311G\*:PM3)  
E(RPM3) = 0.268588814697

Zero-point correction= 0.158392 (Hartree/Particle)  
Thermal correction to Energy= 0.174993  
Thermal correction to Enthalpy= 0.175937  
Thermal correction to Gibbs Free Energy= 0.110740  
Sum of electronic and ZPE= -476.891238  
Sum of electronic and thermal Energies= -476.874638  
Sum of electronic and thermal Enthalpies= -476.873693  
Sum of electronic and thermal Free Energies= -476.938890

| E             | CV        | S         |
|---------------|-----------|-----------|
| KCal/Mol      | Cal/Mol-K | Cal/Mol-K |
| Total 109.809 | 55.365    | 137.217   |

C,0,-2.8438467912,0.0789393223,1.3104803987  
C,0,-3.3039740838,-0.886137535,0.4164014797  
C,0,-2.3960849124,-1.6628473563,-0.293468839  
C,0,-1.0142578918,-1.5049070251,-0.1190038282  
C,0,-0.5621179482,-0.5477904537,0.790275103  
C,0,-1.4669375882,0.2416503735,1.4978329933  
C,0,-0.0443157526,-2.358398702,-0.8888390653  
H,0,-3.5451527896,0.6846127597,1.8725665739  
H,0,-4.3680610769,-1.0268283057,0.2694739662  
H,0,-2.7594095841,-2.4049056343,-0.9969677337  
H,0,0.5227993331,-0.4099205306,0.9387510457  
H,0,-1.0998323408,0.9786491304,2.2039513925  
H,0,-0.0607578959,-3.3854081772,-0.5162480524  
H,0,0.9758169642,-1.9807586485,-0.7925659542  
H,0,-0.3037247534,-2.3913072655,-1.9485776823  
N,0,-1.989908091,1.8410138478,-0.7444773212  
O,0,-1.8727745787,1.0224717684,-1.4823806512

O,0,-2.1065201257,2.7593244302,-0.1280666873  
 F,0,2.2759089434,-0.2410809212,1.1157272779  
 B,0,3.0747542002,0.0937325423,0.037059882  
 F,0,2.3724570581,0.9265635039,-0.8096677411  
 F,0,4.1981561311,0.7500844993,0.4935506305  
 F,0,3.4483425742,-1.0469696226,-0.6402331874

### Pi Complex NO2BF4 PCM ONIOM 2.839\_94082

ONIOM(M062X/6-311G\*:PM3)

E(RPM3) = 0.267551188633

Zero-point correction= 0.157620 (Hartree/Particle)  
 Thermal correction to Energy= 0.174939  
 Thermal correction to Enthalpy= 0.175883  
 Thermal correction to Gibbs Free Energy= 0.105513  
 Sum of electronic and ZPE= -476.888717  
 Sum of electronic and thermal Energies= -476.871398  
 Sum of electronic and thermal Enthalpies= -476.870454  
 Sum of electronic and thermal Free Energies= -476.940824

| E             | CV        | S         |
|---------------|-----------|-----------|
| KCal/Mol      | Cal/Mol-K | Cal/Mol-K |
| Total 109.776 | 55.867    | 148.107   |

C,0,2.4107074304,-6.946925232,1.7047979307  
 C,0,1.6206924415,-6.7876849785,2.8438549686  
 C,0,0.473187116,-6.0071102358,2.7866861979  
 C,0,0.0795205821,-5.3803491319,1.5957001958  
 C,0,0.8687884029,-5.5586942249,0.4583461598  
 C,0,2.0276611083,-6.331547807,0.5092549582  
 C,0,-1.1648364228,-4.5359902881,1.5628526411  
 H,0,3.3030346855,-7.5619079642,1.7394378668  
 H,0,1.9035687265,-7.2696171067,3.7722542582  
 H,0,-0.1346834129,-5.8802337589,3.6769818035  
 H,0,0.5774548851,-5.0891889609,-0.4753919034  
 H,0,2.6261090494,-6.4665391323,-0.3853417117  
 H,0,-1.3840746413,-4.187372311,0.5540041667  
 H,0,-1.0572906593,-3.6620697456,2.2102070017  
 H,0,-2.0248227284,-5.1030973911,1.9248307564  
 N,0,3.4971879015,-4.334089373,1.9364398202  
 O,0,4.4822724033,-4.6436846724,1.5254815159  
 O,0,2.5759344571,-3.9114922598,2.3838366166  
 F,0,1.5326261433,0.8395975616,-1.6095031904  
 B,0,2.0748898755,0.1880922712,-0.5220436989  
 F,0,1.062976047,-0.2498294703,0.3071463485  
 F,0,2.8119503867,-0.8956556521,-0.9543956897  
 F,0,2.8966058224,1.0502082637,0.1739776876

### Pi Complex NO2BF4 PCM ONIOM 2.839\_94167

ONIOM(M062X/6-311G\*:PM3)

E(RPM3) = 0.266843435738

Zero-point correction= 0.157399 (Hartree/Particle)  
 Thermal correction to Energy= 0.174840  
 Thermal correction to Enthalpy= 0.175784  
 Thermal correction to Gibbs Free Energy= 0.104487

Sum of electronic and ZPE= -476.888762  
 Sum of electronic and thermal Energies= -476.871321  
 Sum of electronic and thermal Enthalpies= -476.870377  
 Sum of electronic and thermal Free Energies= -476.941674

| E             | CV        | S         |
|---------------|-----------|-----------|
| KCal/Mol      | Cal/Mol-K | Cal/Mol-K |
| Total 109.714 | 55.888    | 150.057   |

C,0,1.2653940907,-2.9220586745,-0.6295156783  
 C,0,0.9512768129,-1.6524180218,-1.1144488579  
 C,0,1.010812828,-1.3978150505,-2.4796567  
 C,0,1.3689318969,-2.4015904811,-3.3893781246  
 C,0,1.6706025344,-3.672191629,-2.8935597369  
 C,0,1.6229272268,-3.9337329002,-1.5263907395  
 C,0,1.3973234923,-2.1153042783,-4.8658515496  
 H,0,1.2141461031,-3.1297480625,0.4336844385  
 H,0,0.6653365727,-0.8640577851,-0.4277525608  
 H,0,0.7759782664,-0.4054709129,-2.8513865481  
 H,0,1.9478336113,-4.4635539384,-3.5817497446  
 H,0,1.8516391626,-4.9275351746,-1.157364715  
 H,0,0.3860343729,-2.1668215188,-5.2778980581  
 H,0,2.0123845196,-2.8380155435,-5.4022094176  
 H,0,1.7810308285,-1.1138653995,-5.0666383559  
 N,0,4.0470007526,-2.4648708598,-0.9683805041  
 O,0,4.2894650634,-3.0203387201,-0.0372633228  
 O,0,3.9283551671,-1.8773735303,-1.89983358  
 F,0,5.1913632338,1.5821504539,0.0768537288  
 B,0,4.6887276973,2.7933529427,0.5068539721  
 F,0,4.8903441498,2.9152684354,1.865800117  
 F,0,5.3356933167,3.8179359594,-0.1513914984  
 F,0,3.3375082003,2.8502471893,0.2346978359

### Pi Complex NO2BF4 PCM ONIOM 2.841\_94092

ONIOM(M062X/6-311G\*:PM3)

E(RPM3) = 0.267438081587

Zero-point correction= 0.157393 (Hartree/Particle)  
 Thermal correction to Energy= 0.174751  
 Thermal correction to Enthalpy= 0.175695  
 Thermal correction to Gibbs Free Energy= 0.105148  
 Sum of electronic and ZPE= -476.888677  
 Sum of electronic and thermal Energies= -476.871319  
 Sum of electronic and thermal Enthalpies= -476.870375  
 Sum of electronic and thermal Free Energies= -476.940921

| E             | CV        | S         |
|---------------|-----------|-----------|
| KCal/Mol      | Cal/Mol-K | Cal/Mol-K |
| Total 109.658 | 55.877    | 148.477   |

C,0,-0.9498268238,0.1488013235,-2.6976659523  
 C,0,-0.4347986656,1.3638196916,-2.2452686967  
 C,0,0.7910391214,1.3959336352,-1.5924953569  
 C,0,1.5356737822,0.2257304843,-1.386677605  
 C,0,1.017101652,-0.982170917,-1.8541435662  
 C,0,-0.2170462525,-1.0253803576,-2.501201098  
 C,0,2.8612288044,0.2903267608,-0.6785581935  
 H,0,-1.9019962297,0.1166336893,-3.2157319137  
 H,0,-0.9911868773,2.2810623818,-2.3993534237

H,0,1.1843396834,2.3423337504,-1.2349743727  
 H,0,1.5800161495,-1.8985245054,-1.7123736923  
 H,0,-0.6019084463,-1.971291495,-2.8666290838  
 H,0,3.5443479848,0.9615632483,-1.2034941831  
 H,0,3.3289327393,-0.6918784308,-0.6160370411  
 H,0,2.7415516377,0.6780661989,0.3359103207  
 N,0,-1.6799412351,-0.7025651746,-0.086548439  
 O,0,-0.8568598035,-0.1439406071,0.4017420935  
 O,0,-2.5541579252,-1.2824984015,-0.4525946907  
 F,0,-4.5670159487,2.2662142778,2.3349294419  
 B,0,-5.6789108853,1.4518692448,2.4068253936  
 F,0,-5.3010524171,0.2026537112,2.8546752197  
 F,0,-6.5968874421,2.0000047247,3.2768944567  
 F,0,-6.2402780023,1.3360100665,1.1517523826

### Pi Complex NO2BF4 PCM ONIOM 2.843\_94060

ONIOM(M062X/6-311G\*:PM3)  
 E(RPM3) = 0.267764243661

Zero-point correction= 0.157651 (Hartree/Particle)  
 Thermal correction to Energy= 0.174953  
 Thermal correction to Enthalpy= 0.175897  
 Thermal correction to Gibbs Free Energy= 0.105649  
 Sum of electronic and ZPE= -476.888608  
 Sum of electronic and thermal Energies= -476.871306  
 Sum of electronic and thermal Enthalpies= -476.870362  
 Sum of electronic and thermal Free Energies= -476.940609

| E             | CV        | S         |
|---------------|-----------|-----------|
| KCal/Mol      | Cal/Mol-K | Cal/Mol-K |
| Total 109.784 | 55.816    | 147.849   |

C,0,-1.0580609666,-2.4559652005,0.3085246283  
 C,0,-0.4303701989,-1.2825376753,0.7270509791  
 C,0,0.5779346572,-1.3384021656,1.6813525642  
 C,0,0.9922963533,-2.560630001,2.2297343954  
 C,0,0.3682879644,-3.7298856759,1.7928744528  
 C,0,-0.6516949894,-3.6820882048,0.8434402157  
 C,0,2.078022794,-2.5941855166,3.2702317919  
 H,0,-1.8399145276,-2.4213972123,-0.4418438187  
 H,0,-0.7295887211,-0.3282040912,0.3098219986  
 H,0,1.058624698,-0.4222173144,2.0094840706  
 H,0,0.6776961296,-4.6868687936,2.1996076669  
 H,0,-1.1220946852,-4.6010120591,0.5099932781  
 H,0,2.3554240099,-3.6172351435,3.5235848299  
 H,0,1.7508328866,-2.0939090548,4.1852841214  
 H,0,2.9702069103,-2.0735418791,2.9168190705  
 N,0,-2.5603095034,-2.7023144108,2.7105037569  
 O,0,-1.7999592756,-2.1681778849,3.3139114558  
 O,0,-3.4054948649,-3.220583252,2.2089152162  
 F,0,-2.6110073988,-5.1480712438,7.1393338301  
 B,0,-3.803778217,-4.6119735166,7.5797392968  
 F,0,-3.7085820103,-4.3178934766,8.92343201  
 F,0,-4.0742112332,-3.4579420663,6.8730102395  
 F,0,-4.8189207113,-5.5227104614,7.37373565

### Pi Complex NO2BF4 PCM ONIOM 2.844\_94005

ONIOM(M062X/6-311G\*:PM3)  
 E(RPM3) = 0.267806869155

Zero-point correction= 0.157654 (Hartree/Particle)  
 Thermal correction to Energy= 0.174839  
 Thermal correction to Enthalpy= 0.175783  
 Thermal correction to Gibbs Free Energy= 0.106240  
 Sum of electronic and ZPE= -476.888644  
 Sum of electronic and thermal Energies= -476.871459  
 Sum of electronic and thermal Enthalpies= -476.870515  
 Sum of electronic and thermal Free Energies= -476.940058

| E             | CV        | S         |
|---------------|-----------|-----------|
| KCal/Mol      | Cal/Mol-K | Cal/Mol-K |
| Total 109.713 | 55.800    | 146.365   |

C,0,2.1942053115,-1.3852442795,3.3599499118  
 C,0,1.8115932607,-0.0582743596,3.5849046843  
 C,0,0.5394087012,0.2307171721,4.0721858316  
 C,0,-0.3752235484,-0.7921297685,4.3329146815  
 C,0,0.0235509272,-2.116716027,4.110462996  
 C,0,1.295757696,-2.4152311252,3.6354076621  
 C,0,-1.7668284997,-0.4832530235,4.8129976994  
 H,0,3.1900547077,-1.6105036185,2.9944781321  
 H,0,2.5135146687,0.7463811038,3.3948651454  
 H,0,0.255144906,1.262172556,4.2516393897  
 H,0,-0.6747754365,-2.9217626007,4.315858454  
 H,0,1.5864864596,-3.4471344259,3.476114114  
 H,0,-2.1285171458,-1.2529603917,5.4958337964  
 H,0,-2.4602698467,-0.4411475139,3.9681374146  
 H,0,-1.8061968046,0.4793688638,5.3231706539  
 N,0,0.8362775863,-0.6610406278,0.9673801129  
 O,0,1.7752285854,-0.3577927026,0.4562300208  
 O,0,-0.1609431122,-0.9496868675,1.354945962  
 F,0,2.2008012931,-4.5776507571,-0.3737573414  
 B,0,1.4238833418,-5.578387186,-0.9208088838  
 F,0,1.9818455754,-6.8055614456,-0.6315477014  
 F,0,0.1522485678,-5.5108799747,-0.3895948519  
 F,0,1.3583365056,-5.4088700004,-2.2881537841

### Pi Complex NO2BF4 PCM ONIOM 2.847\_94076

ONIOM(M062X/6-311G\*:PM3)  
 E(RPM3) = 0.267489098952

Zero-point correction= 0.157625 (Hartree/Particle)  
 Thermal correction to Energy= 0.174845  
 Thermal correction to Enthalpy= 0.175789  
 Thermal correction to Gibbs Free Energy= 0.105907  
 Sum of electronic and ZPE= -476.889051  
 Sum of electronic and thermal Energies= -476.871831  
 Sum of electronic and thermal Enthalpies= -476.870887  
 Sum of electronic and thermal Free Energies= -476.940769

| E             | CV        | S         |
|---------------|-----------|-----------|
| KCal/Mol      | Cal/Mol-K | Cal/Mol-K |
| Total 109.717 | 55.809    | 147.080   |

C,0,1.0886119246,-1.3210842646,-0.6043259189  
 C,0,1.5228465623,-1.1204796523,-1.9137513397  
 C,0,2.4386365654,-0.1130514852,-2.1943834395  
 C,0,2.9505286063,0.7063060137,-1.1796387686  
 C,0,2.5164210838,0.4910235127,0.1300926137  
 C,0,1.5921036753,-0.5109338309,0.4189121607  
 C,0,3.9652379758,1.7701190955,-1.4966594256  
 H,0,0.3816206094,-2.11097955,-0.376574105  
 H,0,1.1448872857,-1.7462965169,-2.7134747472  
 H,0,2.767639525,0.0430724202,-3.2166305994  
 H,0,2.8996455332,1.115416376,0.9326930944  
 H,0,1.2710515365,-0.6689402427,1.4432357274  
 H,0,3.7486366434,2.2516944683,-2.4512899509  
 H,0,4.9626024319,1.3287359731,-1.5705359059  
 H,0,3.9970639645,2.5347048212,-0.7201977274  
 N,0,-0.593976574,0.9756869195,-0.6229601076  
 O,0,0.0247505345,1.4980712341,-1.3792993468  
 O,0,-1.3138836308,0.5457434294,0.1060929877  
 F,0,2.7048268145,5.0391601545,3.2193681762  
 B,0,2.0356664012,3.8375504491,3.1202117205  
 F,0,2.9339403668,2.8319017557,2.8294346303  
 F,0,1.4047485443,3.5576695269,4.3145324226  
 F,0,1.0937516201,3.9170163927,2.1144718489

### Pi Complex NO2BF4 PCM ONIOM 2.852\_94057

ONIOM(M062X/6-311G\*:PM3)  
 E(RPM3) = 0.267430511131

Zero-point correction= 0.157373 (Hartree/Particle)  
 Thermal correction to Energy= 0.174705  
 Thermal correction to Enthalpy= 0.175649  
 Thermal correction to Gibbs Free Energy= 0.106061  
 Sum of electronic and ZPE= -476.889258  
 Sum of electronic and thermal Energies= -476.871925  
 Sum of electronic and thermal Enthalpies= -476.870981  
 Sum of electronic and thermal Free Energies= -476.940570

| E             | CV        | S         |
|---------------|-----------|-----------|
| KCal/Mol      | Cal/Mol-K | Cal/Mol-K |
| Total 109.629 | 55.872    | 146.461   |

C,0,1.1765873625,-1.4681046311,4.3651804359  
 C,0,1.1374317459,-0.1859148568,4.9215125012  
 C,0,-0.081018914,0.4699777534,5.086426603  
 C,0,-1.2761546142,-0.134936249,4.6938391043  
 C,0,-1.222518143,-1.4216132357,4.1405851112  
 C,0,-0.0129125006,-2.0871430858,3.9816301277  
 C,0,-2.5950048962,0.5738352287,4.8393244495  
 H,0,2.1232101452,-1.9853876458,4.2535360872  
 H,0,2.056835919,0.2922389209,5.2418607007  
 H,0,-0.1011479105,1.4609860205,5.5270110771  
 H,0,-2.1454738337,-1.9047105288,3.835549046  
 H,0,0.0071136108,-3.0850276491,3.5553011158  
 H,0,-2.5131241834,1.4358807462,5.5012172028  
 H,0,-3.3559822223,-0.0979245318,5.2399613234  
 H,0,-2.9514176677,0.9267286223,3.8677075715  
 N,0,1.180610284,0.2799944363,2.1110506019  
 O,0,2.2897414499,0.3275438258,2.0687689064

O,0,0.0752870687,0.2956232251,2.0366619484  
 F,0,0.8394202973,-4.9590183903,2.0033441071  
 B,0,1.0171073966,-4.8851970992,0.6374053669  
 F,0,-0.0105279649,-5.5499914432,0.0019065238  
 F,0,1.0189925588,-3.5617811043,0.2453458468  
 F,0,2.2228641115,-5.4627118282,0.2983561412

### Pi Complex NO2BF4 PCM ONIOM 2.852\_94125

ONIOM(M062X/6-311G\*:PM3)  
 E(RPM3) = 0.267003972576

Zero-point correction= 0.157376 (Hartree/Particle)  
 Thermal correction to Energy= 0.174698  
 Thermal correction to Enthalpy= 0.175642  
 Thermal correction to Gibbs Free Energy= 0.104863  
 Sum of electronic and ZPE= -476.888746  
 Sum of electronic and thermal Energies= -476.871424  
 Sum of electronic and thermal Enthalpies= -476.870479  
 Sum of electronic and thermal Free Energies= -476.941259

| E             | CV        | S         |
|---------------|-----------|-----------|
| KCal/Mol      | Cal/Mol-K | Cal/Mol-K |
| Total 109.625 | 55.860    | 148.967   |

C,0,1.0533877984,1.052220148,-3.8255433203  
 C,0,1.1336209068,2.3737914375,-3.3763584345  
 C,0,2.1925087513,2.774323573,-2.5641278113  
 C,0,3.1813481689,1.8665533184,-2.1801598071  
 C,0,3.0923132082,0.5468670178,-2.6435437559  
 C,0,2.0448185398,0.1409939918,-3.4615518299  
 C,0,4.3083074235,2.2787068699,-1.2732054026  
 H,0,0.23818017,0.7449561186,-4.4712640992  
 H,0,0.3776935003,3.0929680415,-3.6727436109  
 H,0,2.2498942787,3.8035791913,-2.2255814088  
 H,0,3.8581000494,-0.1668894587,-2.3568987869  
 H,0,1.9974374028,-0.8826792089,-3.8140930403  
 H,0,4.1489208679,1.8904899369,-0.2633878603  
 H,0,4.3880836079,3.363680643,-1.2062173407  
 H,0,5.2611004176,1.8827755775,-1.6280873177  
 N,0,-0.1611616932,0.9235559751,-1.2477323384  
 O,0,-1.1835478692,1.0496205904,-1.6635949681  
 O,0,0.8030178718,0.7648082589,-0.7258186356  
 F,0,-1.4335826944,3.2350879375,3.3625804084  
 B,0,-2.3993649085,2.255590851,3.4711000644  
 F,0,-1.9557698524,1.1062746063,2.8490257742  
 F,0,-2.6444756826,1.9915503442,4.8019045599  
 F,0,-3.5589014629,2.687223739,2.8608416613

### Pi Complex NO2BF4 PCM ONIOM 2.854\_93769

ONIOM(M062X/6-311G\*:PM3)  
 E(RPM3) = 0.267971080380

Zero-point correction= 0.157854 (Hartree/Particle)  
 Thermal correction to Energy= 0.174755  
 Thermal correction to Enthalpy= 0.175699  
 Thermal correction to Gibbs Free Energy= 0.109794

Sum of electronic and ZPE= -476.889639  
 Sum of electronic and thermal Energies= -476.872738  
 Sum of electronic and thermal Enthalpies= -476.871794  
 Sum of electronic and thermal Free Energies= -476.937699

E CV S  
 KCal/Mol Cal/Mol-K Cal/Mol-K  
 Total 109.660 55.737 138.708

C,0,2.7553538367,-0.198961917,1.3372238879  
 C,0,3.3258572958,0.7801018919,0.5248642283  
 C,0,2.5105376518,1.6474685433,-0.1919251339  
 C,0,1.1133521027,1.5673515608,-0.1086845312  
 C,0,0.5522843723,0.5917904341,0.7162680778  
 C,0,1.363034637,-0.2872211992,1.4330457024  
 C,0,0.2494893426,2.5220048501,-0.885842256  
 H,0,3.3841319584,-0.8725288395,1.9083455919  
 H,0,4.4036195937,0.8631021455,0.4497772378  
 H,0,2.9587779522,2.4026502504,-0.8295100685  
 H,0,-0.5312234496,0.5093867131,0.7902335866  
 H,0,0.910947589,-1.0337699343,2.0772613487  
 H,0,0.543556564,2.5500119553,-1.9370726564  
 H,0,0.3517105845,3.5356377429,-0.4911761859  
 H,0,-0.8033954777,2.2413741111,-0.8283947835  
 N,0,1.9273248289,-1.8230235427,-0.8596625642  
 O,0,1.9542851221,-2.771607445,-0.2811737728  
 O,0,1.8993772614,-0.958886932,-1.5526305762  
 F,0,-4.3974545784,-0.5212622008,-0.2611253365  
 B,0,-3.1033333808,-0.1677035455,0.0612832334  
 F,0,-2.758674659,-0.7534819971,1.2626910324  
 F,0,-2.254039682,-0.6183969181,-0.9294044052  
 F,0,-3.0157134655,1.2043972731,0.1671073431

### Pi Complex NO2BF4 PCM ONIOM 2.857\_93993

ONIOM(M062X/6-311G\*:PM3)  
 E(RPM3) = 0.266420595424

Zero-point correction= 0.157772 (Hartree/Particle)  
 Thermal correction to Energy= 0.175035  
 Thermal correction to Enthalpy= 0.175979  
 Thermal correction to Gibbs Free Energy= 0.105984  
 Sum of electronic and ZPE= -476.888151  
 Sum of electronic and thermal Energies= -476.870887  
 Sum of electronic and thermal Enthalpies= -476.869943  
 Sum of electronic and thermal Free Energies= -476.939939

E CV S  
 KCal/Mol Cal/Mol-K Cal/Mol-K  
 Total 109.836 55.752 147.318

C,0,4.3078648248,1.2113217647,-2.9354043091  
 C,0,3.8376258835,2.0373701879,-1.9108266205  
 C,0,4.1477208932,1.7508318466,-0.5827940204  
 C,0,4.9238091917,0.6377031189,-0.2538899533  
 C,0,5.3953900837,-0.1778202419,-1.2922114132  
 C,0,5.0982383638,0.1047359123,-2.619304369  
 C,0,5.2437350394,0.2999913598,1.176478912  
 H,0,4.0790616431,1.4423398634,-3.9697698938  
 H,0,3.239518964,2.9100550864,-2.1497125617

H,0,3.7791714022,2.3986315874,0.2057173441  
 H,0,6.0042761798,-1.0431867161,-1.0500161532  
 H,0,5.4785503625,-0.5336952638,-3.408248061  
 H,0,4.9133229966,1.0856523036,1.855499186  
 H,0,6.3178196619,0.1581238326,1.3109189387  
 H,0,4.7536263307,-0.6317449569,1.4708479177  
 N,0,1.9347741374,-0.1488274358,-2.1093999303  
 O,0,2.4353133454,-0.6665175799,-1.2680408039  
 O,0,1.3397366423,0.2980943648,-2.9341771269  
 F,0,-2.6375085414,-3.0409677594,1.616614049  
 B,0,-1.4030592938,-2.4648761402,1.8318565276  
 F,0,-0.471532643,-3.4498238347,2.0871838324  
 F,0,-1.0265013838,-1.7586501341,0.7074253349  
 F,0,-1.473480684,-1.6067336659,2.9094934739

### Pi Complex NO2BF4 PCM ONIOM 2.858\_94149

ONIOM(M062X/6-311G\*:PM3)  
 E(RPM3) = 0.267212235626

Zero-point correction= 0.157311 (Hartree/Particle)  
 Thermal correction to Energy= 0.174683  
 Thermal correction to Enthalpy= 0.175627  
 Thermal correction to Gibbs Free Energy= 0.104611  
 Sum of electronic and ZPE= -476.888790  
 Sum of electronic and thermal Energies= -476.871418  
 Sum of electronic and thermal Enthalpies= -476.870474  
 Sum of electronic and thermal Free Energies= -476.941490

E CV S  
 KCal/Mol Cal/Mol-K Cal/Mol-K  
 Total 109.615 55.862 149.466

C,0,-4.8384392429,-1.4150876179,0.1284602354  
 C,0,-4.3742645313,-0.7529209657,1.2686537305  
 C,0,-4.154922022,0.6237405457,1.2401854542  
 C,0,-4.3866327247,1.3599692679,0.0778581546  
 C,0,-4.8560897798,0.6836460963,-1.0570155443  
 C,0,-5.0860238066,-0.6864568093,-1.034939501  
 C,0,-4.1402246379,2.8431184245,0.0273716266  
 H,0,-5.0242988681,-2.4828236825,0.1559669735  
 H,0,-4.1953515855,-1.3080056309,2.1834173868  
 H,0,-3.7978301458,1.1276917,2.1320724356  
 H,0,-5.0455124796,1.2446645769,-1.9667789826  
 H,0,-5.4559477593,-1.1877974223,-1.9215840552  
 H,0,-3.8175738502,3.2266734996,0.9949986786  
 H,0,-5.0470048615,3.375534316,-0.267076848  
 H,0,-3.3694579689,3.0829410946,-0.7091961955  
 N,0,-2.001233,-1.3090130104,-0.2025591199  
 O,0,-2.0465042616,-0.3556777563,-0.7649870836  
 O,0,-1.8345194515,-2.2756148764,0.3189675604  
 F,0,3.5258950395,1.0410899965,-1.0660239005  
 B,0,3.2460632915,0.249376204,0.0282409688  
 F,0,4.4104378164,-0.3162226392,0.503221206  
 F,0,2.6691827088,1.0196062087,1.0171572256  
 F,0,2.368976121,-0.7502735199,-0.3410174059

**Pi Complex NO2BF4 PCM ONIOM  
2.866\_94198**

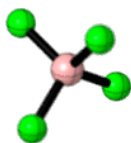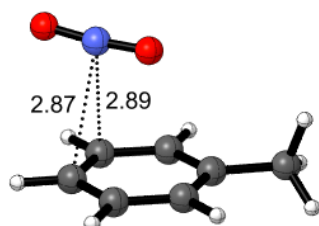

ONIOM(M062X/6-311G\*:PM3)  
E(RPM3) = 0.266440956603

Zero-point correction= 0.157232 (Hartree/Particle)  
Thermal correction to Energy= 0.174589  
Thermal correction to Enthalpy= 0.175533  
Thermal correction to Gibbs Free Energy= 0.104205  
Sum of electronic and ZPE= -476.888952  
Sum of electronic and thermal Energies= -476.871596  
Sum of electronic and thermal Enthalpies= -476.870652  
Sum of electronic and thermal Free Energies= -476.941980

| E             | CV        | S         |
|---------------|-----------|-----------|
| KCal/Mol      | Cal/Mol-K | Cal/Mol-K |
| Total 109.556 | 55.911    | 150.123   |

C,0,-3.8136900644,0.307942171,0.8369737673  
C,0,-3.8952767669,0.2986889649,-0.5589152874  
C,0,-3.5093664397,-0.8315794418,-1.2754862269  
C,0,-3.0287083219,-1.9659158287,-0.6171628422  
C,0,-2.9598605705,-1.9458072019,0.7818427778  
C,0,-3.352030945,-0.8253729587,1.5055422655  
C,0,-2.5664575853,-3.1728024254,-1.3867261936  
H,0,-4.1310678404,1.1818240095,1.3949994825  
H,0,-4.2766350615,1.1673114754,-1.0848269785  
H,0,-3.5830837718,-0.8318035791,-2.357974237  
H,0,-2.5935325812,-2.8220739201,1.3072277131  
H,0,-3.2976361227,-0.8331770204,2.5878880654  
H,0,-1.4801694695,-3.1513266023,-1.5131119151  
H,0,-3.0152457646,-3.206755874,-2.3795203398  
H,0,-2.8166825375,-4.0948035021,-0.8604132453  
N,0,-1.163284515,1.0380206594,0.0256362307  
O,0,-0.8315487524,-0.0146846932,-0.065861352  
O,0,-1.3845857401,2.12346682,0.104886118  
F,0,3.2052012388,1.8058337968,1.5254638272  
B,0,4.1396869612,1.8320325077,0.5104236338  
F,0,4.3283475484,3.1339107203,0.0957371993  
F,0,5.3320398342,1.3120960376,0.9675911875  
F,0,3.683539268,1.0756908851,-0.5497956503

**Pi Complex NO2BF4 PCM ONIOM  
2.868\_93751**

ONIOM(M062X/6-311G\*:PM3)  
E(RPM3) = 0.267565186050

Zero-point correction= 0.157873 (Hartree/Particle)  
Thermal correction to Energy= 0.174743  
Thermal correction to Enthalpy= 0.175687  
Thermal correction to Gibbs Free Energy= 0.110136  
Sum of electronic and ZPE= -476.889778  
Sum of electronic and thermal Energies= -476.872908  
Sum of electronic and thermal Enthalpies= -476.871964  
Sum of electronic and thermal Free Energies= -476.937515

| E             | CV        | S         |
|---------------|-----------|-----------|
| KCal/Mol      | Cal/Mol-K | Cal/Mol-K |
| Total 109.653 | 55.678    | 137.965   |

C,0,-2.6907653831,0.3514104063,1.3517733719  
C,0,-3.3717120662,-0.5687835594,0.5569313789  
C,0,-2.660318391,-1.5036510775,-0.1865985961  
C,0,-1.2606773915,-1.5500480594,-0.1470711834  
C,0,-0.5883562619,-0.6308696258,0.6608059143  
C,0,-1.2934593279,0.3139711857,1.4036396422  
C,0,-0.5063486408,-2.5819949226,-0.9398946995  
H,0,-3.2385653023,1.0785355805,1.9403404829  
H,0,-4.45419975,-0.5539048432,0.5150878121  
H,0,-3.1955397274,-2.2123207442,-0.8100853138  
H,0,0.5000418679,-0.6432407211,0.6996164899  
H,0,-0.7555448624,1.0168888362,2.0307445533  
H,0,-0.9681446161,-2.7479502805,-1.9142263427  
H,0,-0.5039878669,-3.5379148988,-0.4097741722  
H,0,0.532193011,-2.2841833879,-1.0933318466  
N,0,-1.7971772942,1.8959298908,-0.8945078626  
O,0,-1.8289155221,1.0259609964,-1.5795917288  
O,0,-1.7616881584,2.8455306381,-0.3186119953  
F,0,4.4184015092,0.3763205706,-0.0835801347  
B,0,3.1060910193,0.0304408181,0.1637522467  
F,0,3.0471474345,-0.7910762469,1.2702723725  
F,0,2.3710885413,1.1763638974,0.3932505017  
F,0,2.5967601792,-0.6327504528,-0.9341348906

**Pi Complex NO2BF4 PCM ONIOM  
2.870\_93870**

ONIOM(M062X/6-311G\*:PM3)  
E(RPM3) = 0.267106987355

Zero-point correction= 0.157891 (Hartree/Particle)  
Thermal correction to Energy= 0.174886  
Thermal correction to Enthalpy= 0.175830  
Thermal correction to Gibbs Free Energy= 0.108833  
Sum of electronic and ZPE= -476.889649  
Sum of electronic and thermal Energies= -476.872655  
Sum of electronic and thermal Enthalpies= -476.871711  
Sum of electronic and thermal Free Energies= -476.938708

| E             | CV        | S         |
|---------------|-----------|-----------|
| KCal/Mol      | Cal/Mol-K | Cal/Mol-K |
| Total 109.742 | 55.711    | 141.007   |

C,0,-3.0726268251,0.2434256471,1.1789611709  
 C,0,-1.7652802339,-0.1226934507,1.5151368245  
 C,0,-0.6829099106,0.4773827226,0.8743512526  
 C,0,-0.8830397662,1.4449163057,-0.112429186  
 C,0,-2.1977582307,1.8047042247,-0.436763265  
 C,0,-3.2828851151,1.2176148917,0.2042456635  
 C,0,0.2836504966,2.1014591146,-0.7974804032  
 H,0,-3.9136842849,-0.2119900771,1.6890065323  
 H,0,-1.5924473426,-0.8680828057,2.2841180223  
 H,0,0.3321396696,0.184649922,1.1337971517  
 H,0,-2.3674915585,2.5556818484,-1.201534236  
 H,0,-4.2916171254,1.5139110965,-0.0578442707  
 H,0,0.4641773879,3.0914648457,-0.3708371695  
 H,0,0.0940832686,2.2343705525,-1.8637050883  
 H,0,1.1971800696,1.5130541866,-0.6754910647  
 N,0,-2.3185280309,-1.7721844905,-0.720501478  
 O,0,-1.9992722711,-1.0181999883,-1.466256975  
 O,0,-2.6382088694,-2.6156131476,-0.0718637816  
 F,0,2.1580477125,-1.0553816274,-0.3537952855  
 B,0,3.2403365736,-0.2908113164,0.0322473669  
 F,0,4.2900198185,-1.1291338791,0.349888683  
 F,0,3.6178509213,0.5365612161,-1.0053430703  
 F,0,2.9146996462,0.4656452084,1.1387856061

### Pi Complex NO2BF4 PCM ONIOM 2.875\_94070

ONIOM(M062X/6-311G\*:PM3)  
 E(RPM3) = 0.267228760185

Zero-point correction= 0.157816 (Hartree/Particle)  
 Thermal correction to Energy= 0.175116  
 Thermal correction to Enthalpy= 0.176060  
 Thermal correction to Gibbs Free Energy= 0.105422  
 Sum of electronic and ZPE= -476.888312  
 Sum of electronic and thermal Energies= -476.871012  
 Sum of electronic and thermal Enthalpies= -476.870068  
 Sum of electronic and thermal Free Energies= -476.940706

| E             | CV        | S         |
|---------------|-----------|-----------|
| KCal/Mol      | Cal/Mol-K | Cal/Mol-K |
| Total 109.887 | 55.757    | 148.671   |

C,0,3.9063366737,1.8716672295,-2.5472638222  
 C,0,3.2595686218,2.4558972071,-1.454105135  
 C,0,3.5565886726,2.0388736206,-0.1570262823  
 C,0,4.4930763259,1.0299489463,0.0716463762  
 C,0,5.1374977209,0.4559524866,-1.0335922867  
 C,0,4.855414587,0.8731890255,-2.3286656114  
 C,0,4.8043772835,0.550541988,1.4630658512  
 H,0,3.6869548577,2.2080075743,-3.5543958528  
 H,0,2.5349644099,3.2475311134,-1.6125003726  
 H,0,3.0525299813,2.5034799522,0.6840262131  
 H,0,5.8713605531,-0.3268288617,-0.8695688829  
 H,0,5.3701530814,0.4205861333,-3.168149197  
 H,0,4.327408746,1.1774050948,2.21625984  
 H,0,5.8810277656,0.5541583047,1.6433378055  
 H,0,4.4543982113,-0.4753260398,1.6043439426  
 N,0,1.6865084997,0.1400862977,-1.9620599263  
 O,0,2.3171295349,-0.5089891322,-1.3234808367

O,0,0.9705207846,0.6976293123,-2.6029607252  
 F,0,-2.4443684265,-2.745850379,1.0760550798  
 B,0,-1.1388073593,-3.1222488309,1.3139497992  
 F,0,-1.1178539449,-4.3015006529,2.0280480536  
 F,0,-0.4878963034,-3.2997910789,0.1101943028  
 F,0,-0.5021773771,-2.1338570109,2.0362481671

### Pi Complex NO2BF4 PCM ONIOM 2.877\_93769

ONIOM(M062X/6-311G\*:PM3)  
 E(RPM3) = 0.267132492595

Zero-point correction= 0.158214 (Hartree/Particle)  
 Thermal correction to Energy= 0.175249  
 Thermal correction to Enthalpy= 0.176193  
 Thermal correction to Gibbs Free Energy= 0.108904  
 Sum of electronic and ZPE= -476.888387  
 Sum of electronic and thermal Energies= -476.871352  
 Sum of electronic and thermal Enthalpies= -476.870408  
 Sum of electronic and thermal Free Energies= -476.937697

| E             | CV        | S         |
|---------------|-----------|-----------|
| KCal/Mol      | Cal/Mol-K | Cal/Mol-K |
| Total 109.970 | 55.674    | 141.622   |

C,0,3.5600583301,0.2360311215,-0.5485453573  
 C,0,3.5691628392,-0.5120834574,0.6265622054  
 C,0,2.5457381593,-1.4202205065,0.8806666167  
 C,0,1.5019893464,-1.6114760155,-0.0330785499  
 C,0,1.512955265,-0.8700160923,-1.2174212196  
 C,0,2.5268121046,0.050208258,-1.473634309  
 C,0,0.3785717348,-2.5659023481,0.2651553492  
 H,0,4.3579826109,0.939592477,-0.7571901731  
 H,0,4.3707498585,-0.3856817745,1.3447122547  
 H,0,2.5555196279,-1.994145376,1.8016029397  
 H,0,0.7204284479,-1.0123526832,-1.9451426719  
 H,0,2.5229300503,0.6128416584,-2.4011259489  
 H,0,-0.4476460795,-2.0417103124,0.7564401765  
 H,0,0.7029403337,-3.3672877719,0.929195427  
 H,0,-0.0141372173,-3.0105266486,-0.6499249687  
 N,0,1.4204206188,1.9424624293,0.3409278053  
 O,0,1.063837783,1.1759898313,1.0564163441  
 O,0,1.7115086485,2.7944247688,-0.309740515  
 F,0,-2.6783610682,-0.6230737556,0.7853921775  
 B,0,-3.4901165659,0.1666474056,-0.0020962089  
 F,0,-2.7109938701,0.8921505164,-0.8805397199  
 F,0,-4.3634839345,-0.630384603,-0.7114961475  
 F,0,-4.2022260233,1.0345468786,0.7996964936

### Pi Complex NO2BF4 PCM ONIOM 2.879\_94110

ONIOM(M062X/6-311G\*:PM3)  
 E(RPM3) = 0.267312400944

Zero-point correction= 0.157856 (Hartree/Particle)  
 Thermal correction to Energy= 0.175140  
 Thermal correction to Enthalpy= 0.176084  
 Thermal correction to Gibbs Free Energy= 0.105343



Sum of electronic and ZPE= -476.888595  
 Sum of electronic and thermal Energies= -476.871311  
 Sum of electronic and thermal Enthalpies= -476.870367  
 Sum of electronic and thermal Free Energies= -476.941108

E CV S  
 KCal/Mol Cal/Mol-K Cal/Mol-K  
 Total 109.902 55.791 148.886

C,0,2.3083781926,-1.5427545649,-3.1785996808  
 C,0,1.183877978,-2.1108516881,-2.5718267043  
 C,0,-0.0910376385,-1.6293078715,-2.8656764107  
 C,0,-0.2664834394,-0.5705761356,-3.7586560596  
 C,0,0.8689657953,-0.0137720755,-4.3626819607  
 C,0,2.1430965061,-0.4949249032,-4.0831644294  
 C,0,-1.6344322979,-0.0182190646,-4.0526132991  
 H,0,3.2976788305,-1.9308567809,-2.963837944  
 H,0,1.3013569861,-2.9402412115,-1.8823252601  
 H,0,-0.9573597347,-2.081967345,-2.3942503078  
 H,0,0.7473240876,0.8059878752,-5.0635735845  
 H,0,3.0066997948,-0.0553292023,-4.5682082009  
 H,0,-2.4168235771,-0.7111022917,-3.743281879  
 H,0,-1.7548587366,0.1868895865,-5.1173714432  
 H,0,-1.7896523917,0.9234639211,-3.5187452915  
 N,0,1.7465624658,0.1019913275,-0.8833036314  
 O,0,1.1718960956,0.8224032438,-1.4977983368  
 O,0,2.3287653218,-0.530132726,-0.1795018677  
 F,0,-1.8525684677,0.998772266,1.6233323397  
 B,0,-3.0596377601,0.346963077,1.4722792451  
 F,0,-3.2794976153,-0.4678694556,2.5630659531  
 F,0,-4.0740054717,1.2759734021,1.3754209878  
 F,0,-3.0229326237,-0.4199984828,0.3259213659

### Pi Complex NO2BF4 PCM ONIOM 2.889\_93857

ONIOM(M062X/6-311G\*:PM3)  
 E(RPM3) = 0.267215216048

Zero-point correction= 0.157833 (Hartree/Particle)  
 Thermal correction to Energy= 0.174796  
 Thermal correction to Enthalpy= 0.175741  
 Thermal correction to Gibbs Free Energy= 0.108931  
 Sum of electronic and ZPE= -476.889667  
 Sum of electronic and thermal Energies= -476.872704  
 Sum of electronic and thermal Enthalpies= -476.871760  
 Sum of electronic and thermal Free Energies= -476.938570

E CV S  
 KCal/Mol Cal/Mol-K Cal/Mol-K  
 Total 109.686 55.699 140.613

C,0,-3.2903349793,-0.0131094848,-0.9143924832  
 C,0,-2.0445521491,0.1751166832,-1.5247712822  
 C,0,-0.9390410774,-0.555506486,-1.0992051722  
 C,0,-1.049288102,-1.4797622204,-0.0557585117  
 C,0,-2.3012461536,-1.6608100117,0.5423600667  
 C,0,-3.4143214415,-0.9410538808,0.1158122432  
 C,0,0.1522729598,-2.2646195103,0.393978568  
 H,0,-4.1535924382,0.5475133085,-1.2545147832  
 H,0,-1.9422512217,0.8854968422,-2.3382198156

H,0,0.0260685536,-0.4020207066,-1.5745839405  
 H,0,-2.4026209791,-2.3734218404,1.3541706663  
 H,0,-4.3754477637,-1.1000664774,0.5900934396  
 H,0,1.0453851305,-1.6324062597,0.4332995873  
 H,0,0.3591433605,-3.0762566082,-0.3082826055  
 H,0,-0.0043090609,-2.706499656,1.3778786659  
 N,0,-1.8719165659,1.887932334,0.7350351096  
 O,0,-2.1766785815,2.7665601626,0.127486182  
 O,0,-1.5403605156,1.0933069489,1.431171867  
 F,0,2.43397362,0.5524007251,1.1380924878  
 B,0,3.2284269513,0.0839757902,0.1109978883  
 F,0,2.5071835654,0.0783765561,-1.0654887149  
 F,0,4.3189493689,0.9177487086,-0.0317655468  
 F,0,3.6630895194,-1.191828917,0.4024840875

### Pi Complex NO2BF4 PCM ONIOM 2.894\_93761

ONIOM(M062X/6-311G\*:PM3)  
 E(RPM3) = 0.266705108122

Zero-point correction= 0.157922 (Hartree/Particle)  
 Thermal correction to Energy= 0.174787  
 Thermal correction to Enthalpy= 0.175731  
 Thermal correction to Gibbs Free Energy= 0.109908  
 Sum of electronic and ZPE= -476.889605  
 Sum of electronic and thermal Energies= -476.872740  
 Sum of electronic and thermal Enthalpies= -476.871796  
 Sum of electronic and thermal Free Energies= -476.937619

E CV S  
 KCal/Mol Cal/Mol-K Cal/Mol-K  
 Total 109.680 55.655 138.536

C,0,-3.290833929,-0.1041857649,-0.863687202  
 C,0,-2.0520809325,0.1156419655,-1.4756273807  
 C,0,-0.9223027046,-0.5696198712,-1.035604206  
 C,0,-1.0024169476,-1.4760103325,0.0246595678  
 C,0,-2.2493102616,-1.6890300125,0.6252724544  
 C,0,-3.3851967966,-1.0178728816,0.1836456544  
 C,0,0.2187227312,-2.2179006052,0.4943197688  
 H,0,-4.172659547,0.4187798819,-1.2156936594  
 H,0,-1.9724021059,0.8143487399,-2.3017106793  
 H,0,0.0370536913,-0.3948454519,-1.5153436692  
 H,0,-2.326622883,-2.3898776746,1.450052148  
 H,0,-4.3411338259,-1.200131896,0.6603162131  
 H,0,0.1549819724,-2.455536982,1.5567551992  
 H,0,1.1284573267,-1.6349930875,0.32132807  
 H,0,0.3219065777,-3.1607622083,-0.0491414693  
 N,0,-1.9548516622,1.8756369103,0.7710677127  
 O,0,-1.5819662465,1.1006136618,1.4683284053  
 O,0,-2.3045345313,2.7340579959,0.1590453969  
 F,0,2.3785317257,0.7594766002,0.7204649682  
 B,0,3.2482333738,0.1321744487,-0.1488554229  
 F,0,4.3055661284,0.978446212,-0.4149572839  
 F,0,3.7239720269,-1.026710411,0.4281832985  
 F,0,2.5966488194,-0.1617422372,-1.3289188846

### Pi Complex NO2BF4 PCM ONIOM 3.045\_94107

ONIOM(M062X/6-311G\*:PM3)  
E(RPM3) = 0.265798563610

Zero-point correction= 0.157612 (Hartree/Particle)  
Thermal correction to Energy= 0.175016  
Thermal correction to Enthalpy= 0.175960  
Thermal correction to Gibbs Free Energy= 0.104633  
Sum of electronic and ZPE= -476.888095  
Sum of electronic and thermal Energies= -476.870691  
Sum of electronic and thermal Enthalpies= -476.869747  
Sum of electronic and thermal Free Energies= -476.941074

| E             | CV        | S         |
|---------------|-----------|-----------|
| KCal/Mol      | Cal/Mol-K | Cal/Mol-K |
| Total 109.824 | 55.769    | 150.121   |

C,0,-3.8124303407,1.2448895021,0.5638065754  
C,0,-3.6057436488,0.9523810035,-0.7849633239  
C,0,-3.2252538928,-0.3331504761,-1.1782828127  
C,0,-3.0434906309,-1.3446240607,-0.234431079  
C,0,-3.2518128455,-1.0359617659,1.1158485992  
C,0,-3.6349833918,0.2408547961,1.5138539533  
C,0,-2.6438621259,-2.7365841106,-0.6438832669  
H,0,-4.1201254284,2.2389135962,0.8663802518  
H,0,-3.7538663513,1.721147417,-1.5361124031  
H,0,-3.0760641097,-0.5485902259,-2.2313468515  
H,0,-3.1119677011,-1.8109173441,1.8631531543  
H,0,-3.7943231966,0.4532091269,2.5645894294  
H,0,-3.4519139521,-3.4426259949,-0.4391682278  
H,0,-1.7683384602,-3.0732369101,-0.0847523407  
H,0,-2.4127089104,-2.7875872174,-1.7078204814  
N,0,-0.859323404,1.3930470188,-0.1644168284  
O,0,-0.7654082982,0.5347950202,0.527878874  
O,0,-0.8607487592,2.2712593388,-0.8427040669  
F,0,3.8433007279,-1.115569146,0.8497293954  
B,0,4.4440614192,-0.1661377618,0.0491639631  
F,0,5.0321274162,0.7972555033,0.8421092815  
F,0,5.4022861636,-0.7665532929,-0.7399416859  
F,0,3.4902097205,0.4235649837,-0.7552311094

### Pi Complex NO2BF4 PCM ONIOM 3.073\_94058

ONIOM(M062X/6-311G\*:PM3)  
E(RPM3) = 0.266217593082

Zero-point correction= 0.157860 (Hartree/Particle)  
Thermal correction to Energy= 0.175087  
Thermal correction to Enthalpy= 0.176031  
Thermal correction to Gibbs Free Energy= 0.105441  
Sum of electronic and ZPE= -476.888165  
Sum of electronic and thermal Energies= -476.870938  
Sum of electronic and thermal Enthalpies= -476.869994  
Sum of electronic and thermal Free Energies= -476.940584

| E             | CV        | S         |
|---------------|-----------|-----------|
| KCal/Mol      | Cal/Mol-K | Cal/Mol-K |
| Total 109.868 | 55.709    | 148.569   |

C,0,-3.8779930585,-0.8256205229,0.2311964376  
C,0,-2.9863934712,-0.5728279453,1.2738685826  
C,0,-2.1812471735,0.569207822,1.2526518718  
C,0,-2.2516199842,1.4738165105,0.1921100692  
C,0,-3.1519152464,1.2072009706,-0.8463370907  
C,0,-3.9588829341,0.0736233044,-0.8295902075  
C,0,-1.375709831,2.6970344569,0.1462481081  
H,0,-4.5111468033,-1.7047280696,0.2550449605  
H,0,-2.9267369279,-1.2563806121,2.1142799326  
H,0,-1.500045915,0.7595630071,2.0759558062  
H,0,-3.2218427244,1.9021132701,-1.6772246208  
H,0,-4.6520101554,-0.1071553113,-1.6427282638  
H,0,-0.5936114026,2.5839637173,-0.6091554565  
H,0,-0.892431365,2.876205139,1.1066771938  
H,0,-1.9561560417,3.5827748421,-0.1174674472  
N,0,-1.0065765552,-1.706691346,-0.422418877  
O,0,-1.1200509319,-0.9738079697,-1.2440391855  
O,0,-0.8266502047,-2.4871844589,0.3451982827  
F,0,4.7662696235,0.8832484057,-0.7830510159  
B,0,3.9710785439,0.075313842,0.0019847883  
F,0,3.3961429968,-0.9046243254,-0.7814794135  
F,0,4.7367085836,-0.5143006655,0.9859338576  
F,0,2.9768849781,0.8335809389,0.5856976874

### Pi Complex NO2BF4 PCM ONIOM 3.107\_93904

ONIOM(M062X/6-311G\*:PM3)  
E(RPM3) = 0.277412126795

Zero-point correction= 0.158624 (Hartree/Particle)  
Thermal correction to Energy= 0.175113  
Thermal correction to Enthalpy= 0.176057  
Thermal correction to Gibbs Free Energy= 0.112735  
Sum of electronic and ZPE= -476.893161  
Sum of electronic and thermal Energies= -476.876672  
Sum of electronic and thermal Enthalpies= -476.875728  
Sum of electronic and thermal Free Energies= -476.939049

| E             | CV        | S         |
|---------------|-----------|-----------|
| KCal/Mol      | Cal/Mol-K | Cal/Mol-K |
| Total 109.885 | 55.496    | 133.272   |

C,0,-2.1878616448,-2.4860625768,0.7280848241  
C,0,-1.6380220102,-1.2122254535,0.8595436394  
C,0,-1.0656934265,-0.570026181,-0.2466768034  
C,0,-1.0398828387,-1.1876886753,-1.4966824157  
C,0,-1.5887090376,-2.4702393929,-1.6103089767  
C,0,-2.1567271651,-3.1147340739,-0.5143616033  
C,0,-0.44549168,-0.5027316984,-2.6977636642  
H,0,-2.6090073513,-2.9889206877,1.5934803214  
H,0,-1.6507072001,-0.7164699497,1.8253719771  
H,0,-0.6524646354,0.4267258236,-0.1317161475  
H,0,-1.5685692742,-2.9710174016,-2.5728359031  
H,0,-2.5697177475,-4.109827569,-0.62895881  
H,0,-1.2122671153,-0.3276079841,-3.455368888  
H,0,0.3309315583,-1.1182076491,-3.1567094576  
H,0,-0.008999042,0.45934876,-2.4302552079  
N,0,0.9043357157,-2.3103486059,0.9783492152  
O,0,0.7797794677,-3.0251698201,0.1389285601

O,0,1.1902452659,-1.653385303,1.8291297833  
 F,0,0.0904237504,-4.3129829587,2.5474293155  
 B,0,-0.6713534408,-3.9445584768,3.6461024982  
 F,0,-0.0203706968,-4.3103362346,4.8013877793  
 F,0,-0.8047136215,-2.5706648827,3.5957045133  
 F,0,-1.9055821304,-4.5486828089,3.5865467506

### Pi Complex NO<sub>2</sub>BF<sub>4</sub> PCM ONIOM 3.137\_94117

ONIOM(M062X/6-311G\*:PM3)  
 E(RPM3) = 0.273112150382

Zero-point correction= 0.158058 (Hartree/Particle)  
 Thermal correction to Energy= 0.174762  
 Thermal correction to Enthalpy= 0.175706  
 Thermal correction to Gibbs Free Energy= 0.110625  
 Sum of electronic and ZPE= -476.893743  
 Sum of electronic and thermal Energies= -476.877038  
 Sum of electronic and thermal Enthalpies= -476.876094  
 Sum of electronic and thermal Free Energies= -476.941175

| E             | CV        | S         |
|---------------|-----------|-----------|
| KCal/Mol      | Cal/Mol-K | Cal/Mol-K |
| Total 109.665 | 55.572    | 136.975   |

C,0,5.0182879402,-1.4209373254,-3.5216259863  
 C,0,5.6357730067,-0.2522877631,-3.0905854836  
 C,0,5.692859009,0.0512935636,-1.7309230658  
 C,0,5.1383705619,-0.802736485,-0.7743911138  
 C,0,4.5167892759,-1.9745908149,-1.2173206336  
 C,0,4.4562647921,-2.2834310155,-2.5778037159  
 C,0,5.2081405903,-0.4848616948,0.6945317563  
 H,0,4.9768201188,-1.6649651231,-4.5761351777  
 H,0,6.072975203,0.4283443536,-3.8113194422  
 H,0,6.1734557431,0.9687355348,-1.4081644118  
 H,0,4.0647667458,-2.6443371292,-0.4886900494  
 H,0,3.9770120903,-3.2017359596,-2.8999641728  
 H,0,4.2724087869,-0.7490595009,1.1972634061  
 H,0,5.4060154915,0.5733368369,0.8650443339  
 H,0,6.0081857271,-1.0570672599,1.1703438924  
 N,0,2.1913867355,-0.613867897,-2.4255112214  
 O,0,2.7283216009,0.3328023135,-2.2192687544  
 O,0,1.5466508912,-1.4902551112,-2.6490708943  
 F,0,1.7715185831,-1.111610917,0.1217350758  
 B,0,1.6196864617,-1.6166818709,1.4045069133  
 F,0,2.463504437,-2.6914163848,1.5795389225  
 F,0,1.9091608346,-0.6311695639,2.3226965458  
 F,0,0.3134498736,-2.0254503863,1.566626177

### Pi Complex NO<sub>2</sub>BF<sub>4</sub> PCM ONIOM 3.139\_94253

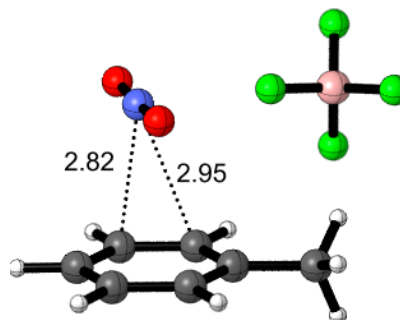

ONIOM(M062X/6-311G\*:PM3)  
 E(RPM3) = 0.273122679758

Zero-point correction= 0.157984 (Hartree/Particle)  
 Thermal correction to Energy= 0.174740  
 Thermal correction to Enthalpy= 0.175685  
 Thermal correction to Gibbs Free Energy= 0.109264  
 Sum of electronic and ZPE= -476.893819  
 Sum of electronic and thermal Energies= -476.877063  
 Sum of electronic and thermal Enthalpies= -476.876118  
 Sum of electronic and thermal Free Energies= -476.942539

| E             | CV        | S         |
|---------------|-----------|-----------|
| KCal/Mol      | Cal/Mol-K | Cal/Mol-K |
| Total 109.651 | 55.593    | 139.795   |

C,0,-3.1804559946,0.4034963697,-0.7960009618  
 C,0,-1.9577802791,0.3545335062,-1.4690502378  
 C,0,-0.9840085464,-0.5736427389,-1.0941315133  
 C,0,-1.2122693228,-1.4686588755,-0.0440316735  
 C,0,-2.4388288927,-1.4046408946,0.6216876817  
 C,0,-3.4146989004,-0.4801386035,0.2514593331  
 C,0,-0.1617316845,-2.4734133604,0.343970515  
 H,0,-3.937645721,1.1191501966,-1.0922084022  
 H,0,-1.76442534,1.0340114321,-2.2922612202  
 H,0,-0.0284035745,-0.59687877,-1.6137977761  
 H,0,-2.6326245306,-2.0856872258,1.4435422933  
 H,0,-4.3569157133,-0.4513675739,0.7855571899  
 H,0,-0.3296845851,-2.8583998627,1.3497442826  
 H,0,0.8382416036,-2.0300619751,0.303834083  
 H,0,-0.1720595062,-3.3205905975,-0.3459967995  
 N,0,-0.7608276865,1.8160468789,0.620523918  
 O,0,-0.3902113358,2.5527680819,-0.1235337312  
 O,0,-1.0923919432,1.1656595473,1.4536537791  
 F,0,3.722527525,0.9550417486,-0.1268884623  
 B,0,2.7438558186,-0.0070258905,0.0004403664  
 F,0,1.5629656936,0.608414625,0.388220988  
 F,0,2.5587510524,-0.6385245965,-1.2097844522  
 F,0,3.1212078636,-0.9208544215,0.9599658

### Pi Complex NO<sub>2</sub>BF<sub>4</sub> PCM ONIOM 3.146\_94108

ONIOM(M062X/6-311G\*:PM3)  
 E(RPM3) = 0.273454772103

Zero-point correction= 0.158059 (Hartree/Particle)  
 Thermal correction to Energy= 0.174823  
 Thermal correction to Enthalpy= 0.175767  
 Thermal correction to Gibbs Free Energy= 0.110769  
 Sum of electronic and ZPE= -476.893790  
 Sum of electronic and thermal Energies= -476.877026  
 Sum of electronic and thermal Enthalpies= -476.876082  
 Sum of electronic and thermal Free Energies= -476.941080

| E             | CV        | S         |
|---------------|-----------|-----------|
| KCal/Mol      | Cal/Mol-K | Cal/Mol-K |
| Total 109.703 | 55.638    | 136.800   |

C,0,3.2600129255,0.4714306797,0.6575863815  
 C,0,2.0723054975,0.4426307223,1.3907724149  
 C,0,1.0837634238,-0.4995733945,1.0950869655  
 C,0,1.2649533434,-1.4311893977,0.0675076582  
 C,0,2.4558998419,-1.3845505066,-0.660961339  
 C,0,3.4444689892,-0.4446728102,-0.3717468499  
 C,0,0.2064567731,-2.4581582033,-0.2300118359  
 H,0,4.0280370767,1.1985603706,0.8912096879  
 H,0,1.9170514338,1.1493663541,2.1989624156  
 H,0,0.1549274607,-0.5069955892,1.6616659608  
 H,0,2.612386753,-2.0929658365,-1.4674467782  
 H,0,4.3580457592,-0.4305870992,-0.9540279678  
 H,0,0.3380217755,-2.8901514733,-1.2220114208  
 H,0,-0.7949938613,-2.0201411615,-0.1722337281  
 H,0,0.2505077293,-3.2709082653,0.4989332201  
 N,0,0.7341336936,1.8211017601,-0.6463025512  
 O,0,0.3424814434,2.538447558,0.1061317846  
 O,0,1.0806351749,1.1921642608,-1.4900423177  
 F,0,-3.1397193028,-1.0102696389,-0.8050157135  
 B,0,-2.7217022125,-0.0361872153,0.0750676387  
 F,0,-3.7025129285,0.9242550402,0.1978975664  
 F,0,-2.4635055298,-0.5906646453,1.3096001382  
 F,0,-1.5708312596,0.5639044909,-0.4136613301

### Pi Complex NO<sub>2</sub>BF<sub>4</sub> PCM ONIOM 3.156\_94025

ONIOM(M062X/6-311G\*:PM3)  
 E(RPM3) = 0.266458589435

Zero-point correction= 0.157694 (Hartree/Particle)  
 Thermal correction to Energy= 0.174970  
 Thermal correction to Enthalpy= 0.175914  
 Thermal correction to Gibbs Free Energy= 0.105613  
 Sum of electronic and ZPE= -476.888179  
 Sum of electronic and thermal Energies= -476.870902  
 Sum of electronic and thermal Enthalpies= -476.869958  
 Sum of electronic and thermal Free Energies= -476.940259

| E             | CV        | S         |
|---------------|-----------|-----------|
| KCal/Mol      | Cal/Mol-K | Cal/Mol-K |
| Total 109.795 | 55.767    | 147.961   |

C,0,-3.8286256057,-1.0717485555,0.5317084246  
 C,0,-2.8063394345,-0.6643613314,1.3862858981  
 C,0,-2.1779349681,0.5714005994,1.1966401776  
 C,0,-2.5622370431,1.418446949,0.156100551  
 C,0,-3.5853643642,0.9917769341,-0.698351804

C,0,-4.2141547574,-0.2365167485,-0.5146869459  
 C,0,-1.9068942629,2.7583690761,-0.0460774731  
 H,0,-4.3210132369,-2.0247654287,0.6841026661  
 H,0,-2.5026784815,-1.2991908607,2.2119215347  
 H,0,-1.3917652243,0.8823686331,1.8777845898  
 H,0,-3.8943834114,1.6343968419,-1.5168198559  
 H,0,-5.0063112085,-0.5418367025,-1.1882911688  
 H,0,-1.0991685154,2.9171627302,0.668453788  
 H,0,-2.6344266507,3.562937556,0.081444894  
 H,0,-1.4968916232,2.8475854189,-1.0543694714  
 N,0,-0.8924491138,-1.4441912171,-0.5642783356  
 O,0,-0.3284913612,-1.9875726913,0.2215375758  
 O,0,-1.3925654215,-0.9470835365,-1.417745049  
 F,0,3.3900829405,0.8565743383,-0.8210226437  
 B,0,4.1909037352,0.0561712721,-0.0319336496  
 F,0,3.4067931902,-0.8801356436,0.6102791324  
 F,0,5.1176137027,-0.5876239291,-0.8247885631  
 F,0,4.8393301157,0.8337232959,0.9041357278

### Pi Complex NO<sub>2</sub>BF<sub>4</sub> PCM ONIOM 3.158\_94252

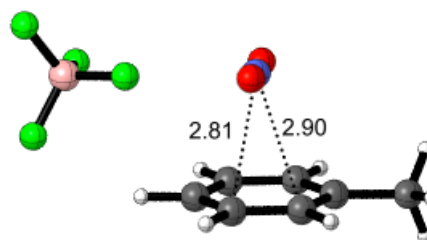

ONIOM(M062X/6-311G\*:PM3)  
 E(RPM3) = 0.274019242422

Zero-point correction= 0.157750 (Hartree/Particle)  
 Thermal correction to Energy= 0.174762  
 Thermal correction to Enthalpy= 0.175706  
 Thermal correction to Gibbs Free Energy= 0.108400  
 Sum of electronic and ZPE= -476.893170  
 Sum of electronic and thermal Energies= -476.876158  
 Sum of electronic and thermal Enthalpies= -476.875214  
 Sum of electronic and thermal Free Energies= -476.942520

| E             | CV        | S         |
|---------------|-----------|-----------|
| KCal/Mol      | Cal/Mol-K | Cal/Mol-K |
| Total 109.665 | 55.749    | 141.658   |

C,0,4.1718200974,-2.594843568,-0.5969244901  
 C,0,4.3367997138,-2.3027378673,-1.9493980158  
 C,0,4.9162959726,-1.0992039473,-2.3420336363  
 C,0,5.3435167515,-0.157987826,-1.3992286139  
 C,0,5.1649240456,-0.4545243179,-0.0472976975  
 C,0,4.5859173502,-1.6655673053,0.354089587  
 C,0,5.9893496011,1.1287325058,-1.8387907356  
 H,0,3.6983468484,-3.5216836419,-0.2872155679  
 H,0,4.0080629513,-3.0116433557,-2.7001697484  
 H,0,5.0382617035,-0.8841909453,-3.3986638245  
 H,0,5.493456896,0.2558151655,0.7046620184  
 H,0,4.464387305,-1.8794619657,1.4105334537  
 H,0,6.9789644918,0.9346068905,-2.2585282971

H,0,6.1093292894,1.8189929351,-1.0037013576  
 H,0,5.3983562272,1.6215119655,-2.6130485362  
 N,0,2.2899375255,-0.106186477,-0.1038336358  
 O,0,2.2542580638,-0.2730219572,-1.1986009723  
 O,0,2.207003002,0.1312987495,0.9784701229  
 F,0,1.5843783728,-4.6749204894,0.7067101965  
 B,0,0.7751224777,-3.7358431416,0.1059847184  
 F,0,0.7787948061,-3.9194130454,-1.2595674781  
 F,0,-0.5104334053,-3.8535969825,0.5866614189  
 F,0,1.2464162123,-2.4630433782,0.3931486914

### Pi Complex NO2BF4 PCM ONIOM 3.163\_93717

ONIOM(M062X/6-311G\*:PM3)  
 E(RPM3) = 0.267265488654

Zero-point correction= 0.158040 (Hartree/Particle)  
 Thermal correction to Energy= 0.174925  
 Thermal correction to Enthalpy= 0.175869  
 Thermal correction to Gibbs Free Energy= 0.109640  
 Sum of electronic and ZPE= -476.888774  
 Sum of electronic and thermal Energies= -476.871889  
 Sum of electronic and thermal Enthalpies= -476.870945  
 Sum of electronic and thermal Free Energies= -476.937174

| E             | CV        | S         |
|---------------|-----------|-----------|
| KCal/Mol      | Cal/Mol-K | Cal/Mol-K |
| Total 109.767 | 55.594    | 139.390   |

C,0,5.1918020863,0.2016578552,4.7005408337  
 C,0,4.7922987579,-0.5202539425,5.8221055054  
 C,0,4.1441401872,-1.7435408854,5.67353596  
 C,0,3.880590687,-2.2758302417,4.4070212618  
 C,0,4.2751056781,-1.5394461871,3.2879470816  
 C,0,4.9288038206,-0.3109684585,3.4315356011  
 C,0,3.2092375867,-3.6150611649,4.2644666277  
 H,0,5.7045645256,1.149381959,4.8113226943  
 H,0,4.9859324422,-0.1312594792,6.814837323  
 H,0,3.8384107794,-2.2973703615,6.5554874762  
 H,0,4.0823284193,-1.933340159,2.2910856008  
 H,0,5.2423201008,0.235284327,2.5480952508  
 H,0,3.9068790086,-4.4167305606,4.5183726005  
 H,0,2.8667755325,-3.7830503071,3.2424968156  
 H,0,2.3535102544,-3.7021483556,4.9361455988  
 N,0,2.2363021095,0.5475089329,3.6276885156  
 O,0,2.0793276831,0.1792273382,4.6602616509  
 O,0,2.2908012498,0.9733940488,2.6043799776  
 F,0,3.6316670952,-1.62331694,-0.2358570831  
 B,0,2.5847909883,-2.5039249684,-0.4135961874  
 F,0,2.8609765951,-3.3419141225,-1.4733630707  
 F,0,2.4074008407,-3.252627007,0.7316128159  
 F,0,1.4297908717,-1.7936835199,-0.6722592502

### Pi Complex NO2BF4 PCM ONIOM 3.173\_93824

ONIOM(M062X/6-311G\*:PM3)  
 E(RPM3) = 0.277777528472

Zero-point correction= 0.159150 (Hartree/Particle)  
 Thermal correction to Energy= 0.175184  
 Thermal correction to Enthalpy= 0.176128  
 Thermal correction to Gibbs Free Energy= 0.114528  
 Sum of electronic and ZPE= -476.893626  
 Sum of electronic and thermal Energies= -476.877592  
 Sum of electronic and thermal Enthalpies= -476.876648  
 Sum of electronic and thermal Free Energies= -476.938248

| E             | CV        | S         |
|---------------|-----------|-----------|
| KCal/Mol      | Cal/Mol-K | Cal/Mol-K |
| Total 109.930 | 55.079    | 129.648   |

C,0,3.2249727939,0.6106217002,0.4981049261  
 C,0,2.1432100674,0.5198141093,1.3739561707  
 C,0,1.1741981404,-0.4733359014,1.1957152533  
 C,0,1.2672192735,-1.392947329,0.1442048863  
 C,0,2.3489692521,-1.277910989,-0.7306631169  
 C,0,3.3188717661,-0.2885337244,-0.5573706205  
 C,0,0.226950564,-2.4656661738,-0.0204686392  
 H,0,3.9802632937,1.3734967293,0.6404285115  
 H,0,2.0567024126,1.2107167536,2.2054377206  
 H,0,0.3366788402,-0.5368675446,1.8864103441  
 H,0,2.4382305238,-1.9718817829,-1.5594483119  
 H,0,4.1480547219,-0.2248753718,-1.2518227443  
 H,0,0.2464035575,-3.1480030202,0.8319296748  
 H,0,0.3991947509,-3.0494057994,-0.9239561902  
 H,0,-0.7952454084,-2.0388325603,-0.0714509433  
 N,0,0.4100984136,1.7173159396,-0.4615382456  
 O,0,0.8576782118,1.2427880425,-1.3591437285  
 O,0,-0.1006393355,2.3089013498,0.3299776321  
 F,0,-1.9889360723,0.3755662734,1.0966337253  
 B,0,-2.5618730862,-0.0978933976,-0.0665708647  
 F,0,-2.4996082611,-1.474810207,-0.0937571456  
 F,0,-3.8661574113,0.3248137697,-0.1617672891  
 F,0,-1.8198610086,0.4172551338,-1.1180190049

### Pi Complex NO2BF4 PCM ONIOM 3.178\_94087

ONIOM(M062X/6-311G\*:PM3)  
 E(RPM3) = 0.273688937032

Zero-point correction= 0.158196 (Hartree/Particle)  
 Thermal correction to Energy= 0.174943  
 Thermal correction to Enthalpy= 0.175887  
 Thermal correction to Gibbs Free Energy= 0.110731  
 Sum of electronic and ZPE= -476.893405  
 Sum of electronic and thermal Energies= -476.876658  
 Sum of electronic and thermal Enthalpies= -476.875714  
 Sum of electronic and thermal Free Energies= -476.940870

| E             | CV        | S         |
|---------------|-----------|-----------|
| KCal/Mol      | Cal/Mol-K | Cal/Mol-K |
| Total 109.778 | 55.635    | 137.132   |

C,0,3.4970237463,-0.408405004,0.1215216464  
 C,0,3.3011343492,0.5403826174,-0.8758151655  
 C,0,2.2290987481,1.4301156495,-0.7997993414  
 C,0,1.3320349676,1.3942504619,0.2694518568  
 C,0,1.5297496144,0.4269997136,1.2616169383

C,0,2.6032276889,-0.4662854092,1.1908969238  
 C,0,0.1758359302,2.3541107512,0.3522774846  
 H,0,4.3347423175,-1.0931569802,0.0726017169  
 H,0,3.9837146618,0.5936930059,-1.7156720056  
 H,0,2.091502558,2.1677990119,-1.5831558254  
 H,0,0.8491631931,0.3818148538,2.1068901459  
 H,0,2.7477875109,-1.1953187422,1.9808829872  
 H,0,-0.7762906711,1.8400217257,0.1761328408  
 H,0,0.2689024687,3.1484241848,-0.3879856944  
 H,0,0.1186207948,2.8109165055,1.3416494384  
 N,0,0.6847434024,-1.7998395751,-0.3851206351  
 O,0,0.8834523865,-1.2220111108,-1.309513621  
 O,0,0.4199605311,-2.4687137201,0.461953952  
 F,0,-2.970646463,0.7030262893,1.1526077817  
 B,0,-2.8535196673,0.0473363501,-0.0531773063  
 F,0,-3.8666661762,-0.878676202,-0.1757305888  
 F,0,-2.9243442381,0.9509493848,-1.0907209634  
 F,0,-1.6360266536,-0.6149067617,-0.104121566

### Pi Complex NO2BF4 PCM ONIOM 3.180\_94194

ONIOM(M062X/6-311G\*:PM3)  
 E(RPM3) = 0.266022363459

Zero-point correction= 0.157283 (Hartree/Particle)  
 Thermal correction to Energy= 0.174761  
 Thermal correction to Enthalpy= 0.175705  
 Thermal correction to Gibbs Free Energy= 0.103846  
 Sum of electronic and ZPE= -476.888506  
 Sum of electronic and thermal Energies= -476.871028  
 Sum of electronic and thermal Enthalpies= -476.870084  
 Sum of electronic and thermal Free Energies= -476.941943

| E             | CV        | S         |
|---------------|-----------|-----------|
| KCal/Mol      | Cal/Mol-K | Cal/Mol-K |
| Total 109.664 | 55.856    | 151.241   |

C,0,3.2793401828,1.843435976,-0.2963201075  
 C,0,3.2413519392,1.2508368027,0.9636489244  
 C,0,3.4767911822,-0.1213436599,1.1058495071  
 C,0,3.7599594409,-0.9189596185,-0.0043123763  
 C,0,3.7879902268,-0.3098797079,-1.263909985  
 C,0,3.5514369435,1.0539367256,-1.4117208348  
 C,0,4.040564773,-2.3909036454,0.1381386949  
 H,0,3.1026541095,2.9067456844,-0.4063685732  
 H,0,3.0391257862,1.8544337917,1.8422862044  
 H,0,3.4555982618,-0.5672309729,2.0954140786  
 H,0,4.0023254824,-0.9145541396,-2.1396790097  
 H,0,3.5808396779,1.5005493178,-2.3988026221  
 H,0,5.0829296902,-2.6062137709,-0.1078915585  
 H,0,3.418244626,-2.9778649233,-0.5403997362  
 H,0,3.8577694218,-2.7348536667,1.156256977  
 N,0,0.629542051,0.2393373097,0.4260075238  
 O,0,0.8528237814,-0.0748260822,-0.6115937913  
 O,0,0.3079423207,0.5324042327,1.4467050095  
 F,0,-5.6842482499,0.5367605657,0.6650256251  
 B,0,-4.7404756353,-0.098486184,-0.1141805268  
 F,0,-3.9468492646,-0.8960927845,0.6847809428  
 F,0,-5.3684379448,-0.8791339917,-1.0618290723  
 F,0,-3.9532808027,0.8440307414,-0.743776294

### Pi Complex NO2BF4 PCM ONIOM 3.191\_93775

ONIOM(M062X/6-311G\*:PM3)  
 E(RPM3) = 0.267820774694

Zero-point correction= 0.157848 (Hartree/Particle)  
 Thermal correction to Energy= 0.174765  
 Thermal correction to Enthalpy= 0.175709  
 Thermal correction to Gibbs Free Energy= 0.109175  
 Sum of electronic and ZPE= -476.889080  
 Sum of electronic and thermal Energies= -476.872163  
 Sum of electronic and thermal Enthalpies= -476.871219  
 Sum of electronic and thermal Free Energies= -476.937753

| E             | CV        | S         |
|---------------|-----------|-----------|
| KCal/Mol      | Cal/Mol-K | Cal/Mol-K |
| Total 109.666 | 55.637    | 140.032   |

C,0,2.8532320606,0.4448279652,4.0773677583  
 C,0,2.1013665111,0.4002018353,5.2484884314  
 C,0,1.1257201115,-0.5787724657,5.4190475367  
 C,0,0.8777435004,-1.5355002076,4.4294220503  
 C,0,1.627526897,-1.4748035196,3.2528686516  
 C,0,2.6110774947,-0.4943821751,3.0774307926  
 C,0,-0.1580124697,-2.6067055752,4.6412929432  
 H,0,3.6195045693,1.1989995166,3.9456536626  
 H,0,2.2742960876,1.1283813264,6.0320377523  
 H,0,0.5467639172,-0.6035519213,6.3367318381  
 H,0,1.4508523682,-2.2067296409,2.4655630865  
 H,0,3.1940319634,-0.4781087305,2.1625988127  
 H,0,0.1958194278,-3.336607254,5.3731249162  
 H,0,-0.374039181,-3.14078359,3.7146519582  
 H,0,-1.0893770955,-2.1856945614,5.0239929131  
 N,0,0.289534126,0.8876886367,2.2290103188  
 O,0,-0.0627687741,1.1318896101,3.2502898498  
 O,0,0.5583110853,0.7253729805,1.1643648547  
 F,0,1.3461197076,-2.7656092609,-0.0413313397  
 B,0,0.336572365,-3.6907108575,0.1297403817  
 F,0,0.8790456899,-4.8974604315,0.5183942171  
 F,0,-0.5453908892,-3.2455896697,1.0934625038  
 F,0,-0.338748673,-3.8492043101,-1.0629855898

### Pi Complex NO2BF4 PCM ONIOM 3.208\_93983

ONIOM(M062X/6-311G\*:PM3)  
 E(RPM3) = 0.274697447668

Zero-point correction= 0.158304 (Hartree/Particle)  
 Thermal correction to Energy= 0.175013  
 Thermal correction to Enthalpy= 0.175957  
 Thermal correction to Gibbs Free Energy= 0.111385  
 Sum of electronic and ZPE= -476.892915  
 Sum of electronic and thermal Energies= -476.876205  
 Sum of electronic and thermal Enthalpies= -476.875261  
 Sum of electronic and thermal Free Energies= -476.939833

| E | CV | S |
|---|----|---|
|---|----|---|

KCal/Mol Cal/Mol-K Cal/Mol-K  
Total 109.822 55.625 135.903

C,0,0.4263675733,1.3793791248,0.4081483167  
C,0,0.9003036984,0.4351528431,1.313955792  
C,0,2.1917812415,-0.0914387456,1.1736898623  
C,0,3.0278411385,0.322465029,0.1350311165  
C,0,2.5336761747,1.2675675471,-0.7699780058  
C,0,1.249370096,1.7896055456,-0.6392355063  
C,0,4.4227625054,-0.223929362,-0.0127658127  
H,0,-0.5853838986,1.7636952448,0.5010374425  
H,0,0.2673293015,0.1025620551,2.1298746591  
H,0,2.553096842,-0.8195903319,1.8932422964  
H,0,3.1638895989,1.5960224972,-1.5900278933  
H,0,0.8878518485,2.5147975481,-1.358784896  
H,0,4.6274550043,-0.9946391239,0.730320957  
H,0,5.1609350118,0.5709864053,0.1120051792  
H,0,4.572528393,-0.6542816204,-1.0051813276  
N,0,0.5588023242,-1.693041805,-0.5072027037  
O,0,0.7228305098,-1.0704376945,-1.4093790108  
O,0,0.355907778,-2.4285438025,0.3012820698  
F,0,-2.8933881639,0.704355874,1.3314938947  
B,0,-2.9129206203,0.1543225446,0.0688140694  
F,0,-2.8399434709,1.1517452755,-0.8788332191  
F,0,-1.8302826319,-0.6997389751,-0.0830365153  
F,0,-4.0743752545,-0.5658460734,-0.1055587651

### Pi Complex NO2BF4 PCM ONIOM 3.215\_94153

ONIOM(M062X/6-311G\*:PM3)  
E(RPM3) = 0.266546634745

Zero-point correction= 0.157705 (Hartree/Particle)  
Thermal correction to Energy= 0.175147  
Thermal correction to Enthalpy= 0.176092  
Thermal correction to Gibbs Free Energy= 0.104203  
Sum of electronic and ZPE= -476.888028  
Sum of electronic and thermal Energies= -476.870585  
Sum of electronic and thermal Enthalpies= -476.869641  
Sum of electronic and thermal Free Energies= -476.941530

E CV S  
KCal/Mol Cal/Mol-K Cal/Mol-K  
Total 109.907 55.760 151.303

C,0,1.7667138673,-1.7776005941,-1.8406867687  
C,0,1.454153846,-0.6217503128,-2.5483969888  
C,0,2.1720705834,0.5542152192,-2.328300094  
C,0,3.2147127536,0.601718855,-1.4011433604  
C,0,3.5143104509,-0.5640675564,-0.6864327707  
C,0,2.8006740469,-1.7447755978,-0.9043984542  
C,0,4.0066164531,1.8617366238,-1.1724610728  
H,0,1.2166101894,-2.6943306435,-2.0157858251  
H,0,0.6508424821,-0.6319540961,-3.276015235  
H,0,1.9178732958,1.4479213856,-2.8887203998  
H,0,4.3265665969,-0.5530726306,0.0348583934  
H,0,3.0631447832,-2.6409753677,-0.3520688319  
H,0,5.0576238554,1.704621843,-1.4242640982  
H,0,3.9659838417,2.1692867826,-0.1251461504  
H,0,3.6306392233,2.6821563249,-1.7833348315

N,0,1.1286637019,-0.4062653282,0.9971246387  
O,0,0.6202862596,0.2157361719,0.2356698865  
O,0,1.5648688438,-1.0023460783,1.8251391562  
F,0,2.0991684405,4.5455461087,4.7545834585  
B,0,1.0431410037,3.7582421559,4.3466079726  
F,0,-0.111350009,4.1611736064,4.9841444497  
F,0,0.879650548,3.8773591895,2.9815216822  
F,0,1.3048763427,2.4400187393,4.6601323439

### Pi Complex NO2BF4 PCM ONIOM 3.217\_93889

ONIOM(M062X/6-311G\*:PM3)  
E(RPM3) = 0.267250548074

Zero-point correction= 0.158048 (Hartree/Particle)  
Thermal correction to Energy= 0.175237  
Thermal correction to Enthalpy= 0.176182  
Thermal correction to Gibbs Free Energy= 0.107389  
Sum of electronic and ZPE= -476.888234  
Sum of electronic and thermal Energies= -476.871044  
Sum of electronic and thermal Enthalpies= -476.870100  
Sum of electronic and thermal Free Energies= -476.938893

E CV S  
KCal/Mol Cal/Mol-K Cal/Mol-K  
Total 109.963 55.726 144.787

C,0,3.9573147694,0.3105720139,-0.4117434382  
C,0,3.4085395912,0.4008987591,0.8650621716  
C,0,2.3442508144,-0.4291810822,1.2351414906  
C,0,1.8154566312,-1.3631679025,0.3400639443  
C,0,2.3724605846,-1.4348457965,-0.9405427705  
C,0,3.4306002318,-0.6096280462,-1.3149010747  
C,0,0.666503938,-2.2535774728,0.7310878586  
H,0,4.7885636861,0.944626342,-0.6955291545  
H,0,3.8159507229,1.1034695508,1.584271759  
H,0,1.9363792112,-0.3603213799,2.239372099  
H,0,1.9746738124,-2.1511213369,-1.6524764027  
H,0,3.8471970088,-0.6900241458,-2.3122294732  
H,0,0.5783801293,-2.3338527753,1.8147393928  
H,0,0.7921736385,-3.2561800911,0.3205038367  
H,0,-0.2803101313,-1.8608481097,0.3474908115  
N,0,1.1546015354,1.8540072819,-0.0750040898  
O,0,1.1251466132,2.4596741672,0.8546243085  
O,0,1.1172749761,1.3260836963,-1.0474004351  
F,0,-4.4065313782,0.5784227715,0.9399819586  
B,0,-3.6635255909,-0.0932647771,-0.0082741881  
F,0,-2.6334133261,-0.769174717,0.6129415869  
F,0,-4.4677628313,-0.9908888404,-0.6781200799  
F,0,-3.1380936368,0.8147908907,-0.9049321112

### Pi Complex NO2BF4 PCM ONIOM 3.221\_94009

ONIOM(M062X/6-311G\*:PM3)  
E(RPM3) = 0.266867901234

Zero-point correction= 0.157916 (Hartree/Particle)  
Thermal correction to Energy= 0.175144

Thermal correction to Enthalpy= 0.176088  
 Thermal correction to Gibbs Free Energy= 0.105776  
 Sum of electronic and ZPE= -476.887953  
 Sum of electronic and thermal Energies= -476.870726  
 Sum of electronic and thermal Enthalpies= -476.869781  
 Sum of electronic and thermal Free Energies= -476.940093

| E        | CV        | S              |
|----------|-----------|----------------|
| KCal/Mol | Cal/Mol-K | Cal/Mol-K      |
| Total    | 109.904   | 55.720 147.984 |

C,0,1.5556200145,1.5754920445,-0.6853394126  
 C,0,2.2885925767,1.8845290006,0.4584182486  
 C,0,3.4035202248,1.1246461114,0.8039489733  
 C,0,3.8137822317,0.0417810676,0.0196504476  
 C,0,3.0629124392,-0.2696272045,-1.1161963398  
 C,0,1.9440845708,0.4934085604,-1.4710206975  
 C,0,5.0443752106,-0.745350419,0.3831464923  
 H,0,0.6917041497,2.1688271397,-0.960954445  
 H,0,1.9922460109,2.7194385956,1.082783305  
 H,0,3.9673818441,1.3773827577,1.6962879107  
 H,0,3.3629110219,-1.1026773309,-1.744534854  
 H,0,1.387101458,0.2453206289,-2.3685508735  
 H,0,5.0759143577,-0.9584561118,1.4529682743  
 H,0,5.9438860758,-0.1762436186,0.1361840505  
 H,0,5.0882929006,-1.6896064109,-0.1597713464  
 N,0,0.8295056288,-1.3782347092,0.3754504086  
 O,0,1.0977485007,-0.780467718,1.2677298019  
 O,0,0.504210927,-2.0431241616,-0.4513467486  
 F,0,-3.6499683631,-1.1474448116,0.1808504607  
 B,0,-4.1669717354,0.1239860612,0.0367555536  
 F,0,-3.2997069352,0.8853074252,-0.7200148348  
 F,0,-5.390903833,0.0569049809,-0.5944631797  
 F,0,-4.3159212767,0.7016051225,1.2805278047

### Pi Complex NO2BF4 PCM ONIOM 3.228\_94053

ONIOM(M062X/6-311G\*:PM3)  
 E(RPM3) = 0.266407337192

Zero-point correction= 0.157742 (Hartree/Particle)  
 Thermal correction to Energy= 0.175043  
 Thermal correction to Enthalpy= 0.175987  
 Thermal correction to Gibbs Free Energy= 0.105306  
 Sum of electronic and ZPE= -476.888101  
 Sum of electronic and thermal Energies= -476.870800  
 Sum of electronic and thermal Enthalpies= -476.869856  
 Sum of electronic and thermal Free Energies= -476.940537

| E        | CV        | S              |
|----------|-----------|----------------|
| KCal/Mol | Cal/Mol-K | Cal/Mol-K      |
| Total    | 109.841   | 55.741 148.762 |

C,0,-3.8554348654,-1.319479151,0.7528593789  
 C,0,-3.683802956,-0.2533884912,1.6314693819  
 C,0,-3.2942383309,0.9964082371,1.1532643784  
 C,0,-3.0698843008,1.2122783263,-0.2094069071  
 C,0,-3.2330580933,0.1323809303,-1.0817481623  
 C,0,-3.6261023494,-1.1235309806,-0.607615228  
 C,0,-2.693732763,2.5755033174,-0.7252762244

H,0,-4.1647478832,-2.2901854963,1.1211624208  
 H,0,-3.8518754441,-0.3934754841,2.6929986154  
 H,0,-3.1633546307,1.817883813,1.8502107839  
 H,0,-3.0693128072,0.2759034287,-2.1457400671  
 H,0,-3.7624407884,-1.9416077464,-1.3067614789  
 H,0,-2.1310959935,3.1400262077,0.0191199557  
 H,0,-3.592844516,3.1491030661,-0.9645051604  
 H,0,-2.0956986387,2.5082577595,-1.6349710016  
 N,0,-0.7855192093,-1.1939381069,-0.239702394  
 O,0,-0.821527899,-0.6796788283,0.7397170216  
 O,0,-0.6501427327,-1.7334561813,-1.2000041987  
 F,0,3.8093518314,-0.7375386913,0.8116876664  
 B,0,4.4024370157,0.20542164,-0.002731959  
 F,0,5.1999724022,1.0339428208,0.7580759804  
 F,0,5.1697952821,-0.4298154497,-0.9564827276  
 F,0,3.4232256702,0.9526860601,-0.6247460743

### Pi Complex NO2BF4 PCM ONIOM 3.229\_94135

ONIOM(M062X/6-311G\*:PM3)  
 E(RPM3) = 0.266475122039

Zero-point correction= 0.157610 (Hartree/Particle)  
 Thermal correction to Energy= 0.174953  
 Thermal correction to Enthalpy= 0.175897  
 Thermal correction to Gibbs Free Energy= 0.104442  
 Sum of electronic and ZPE= -476.888188  
 Sum of electronic and thermal Energies= -476.870845  
 Sum of electronic and thermal Enthalpies= -476.869900  
 Sum of electronic and thermal Free Energies= -476.941356

| E        | CV        | S              |
|----------|-----------|----------------|
| KCal/Mol | Cal/Mol-K | Cal/Mol-K      |
| Total    | 109.785   | 55.760 150.391 |

C,0,3.8290616878,1.2862642092,0.7403010871  
 C,0,3.6556969672,0.2112530925,1.6090959098  
 C,0,3.2542456857,-1.0294460271,1.1202124837  
 C,0,3.0188763256,-1.2290394202,-0.2441269889  
 C,0,3.1845080737,-0.1419944302,-1.1053711716  
 C,0,3.5897476368,1.1068080015,-0.6197986869  
 C,0,2.6207125214,-2.5851163054,-0.7624478612  
 H,0,4.1483199766,2.250468532,1.1171144396  
 H,0,3.832443132,0.3387929473,2.6707950717  
 H,0,3.1221890095,-1.8583725486,1.8083153164  
 H,0,3.0135829458,-0.2720411213,-2.1698119245  
 H,0,3.7280819475,1.9310292886,-1.3112672362  
 H,0,2.2187450046,-2.5240881837,-1.7740198852  
 H,0,1.8716183659,-3.0492686735,-0.1186108146  
 H,0,3.4875900321,-3.2499236808,-0.7872927507  
 N,0,0.751337557,1.1893213836,-0.2334896118  
 O,0,0.6126477764,1.7384936124,-1.1878115516  
 O,0,0.791163245,0.6655857726,0.7407946193  
 F,0,-4.6702668486,0.6815154968,-1.0107767842  
 B,0,-4.3664886314,-0.1733952347,0.0285124107  
 F,0,-5.5032343577,-0.843181253,0.428558444  
 F,0,-3.4185751958,-1.0845807995,-0.3904883968  
 F,0,-3.862040857,0.5554033415,1.0862538819



### Pi Complex NO<sub>2</sub>BF<sub>4</sub> PCM ONIOM 3.231\_94060

ONIOM(M062X/6-311G\*:PM3)  
E(RPM3) = 0.266441526657

Zero-point correction= 0.157613 (Hartree/Particle)  
Thermal correction to Energy= 0.174934  
Thermal correction to Enthalpy= 0.175878  
Thermal correction to Gibbs Free Energy= 0.105230  
Sum of electronic and ZPE= -476.888221  
Sum of electronic and thermal Energies= -476.870900  
Sum of electronic and thermal Enthalpies= -476.869956  
Sum of electronic and thermal Free Energies= -476.940605

| E             | CV        | S         |
|---------------|-----------|-----------|
| KCal/Mol      | Cal/Mol-K | Cal/Mol-K |
| Total 109.773 | 55.769    | 148.692   |

C,0,-0.4190673236,-0.1108187938,3.5945498909  
C,0,-1.1910501841,0.9931804677,3.2417311196  
C,0,-2.0046615008,0.9495465567,2.1034512529  
C,0,-2.0644732225,-0.1955043973,1.3058453305  
C,0,-1.2754638996,-1.2920181534,1.6687270873  
C,0,-0.4629647818,-1.2535851796,2.7991746575  
C,0,-2.9656023303,-0.2649712243,0.1019826841  
H,0,0.2066346888,-0.0810026813,4.4784182674  
H,0,-1.1747355395,1.8883366003,3.8541611474  
H,0,-2.6115625871,1.8126064369,1.8465825376  
H,0,-1.2994132359,-2.1885771208,1.0574572161  
H,0,0.1377325818,-2.1176424905,3.0585704113  
H,0,-3.8533350284,-0.8606935626,0.3280341365  
H,0,-2.4608511745,-0.7383754753,-0.7419465829  
H,0,-3.299227505,0.7264502406,-0.2052220996  
N,0,0.6279916602,1.7325435076,1.1557602803  
O,0,0.4711624784,2.8107100778,1.3666005118  
O,0,0.8660858793,0.6854776627,0.8871317533  
F,0,2.1202774106,1.5080041391,-3.4060068236  
B,0,2.7954293645,2.6846856784,-3.6584368345  
F,0,2.4668849635,3.1433086,-4.9165801119  
F,0,2.4367500024,3.6269443783,-2.716116763  
F,0,4.1541583838,2.4592218327,-3.5856359692

### Pi Complex NO<sub>2</sub>BF<sub>4</sub> PCM ONIOM 3.236\_93860

ONIOM(M062X/6-311G\*:PM3)  
E(RPM3) = 0.266421809273

Zero-point correction= 0.157946 (Hartree/Particle)  
Thermal correction to Energy= 0.175144  
Thermal correction to Enthalpy= 0.176088  
Thermal correction to Gibbs Free Energy= 0.107281  
Sum of electronic and ZPE= -476.887940  
Sum of electronic and thermal Energies= -476.870742  
Sum of electronic and thermal Enthalpies= -476.869798  
Sum of electronic and thermal Free Energies= -476.938605

| E             | CV        | S         |
|---------------|-----------|-----------|
| KCal/Mol      | Cal/Mol-K | Cal/Mol-K |
| Total 109.904 | 55.721    | 144.817   |

C,0,-1.0520848413,4.0552926138,1.3748907602  
C,0,-1.6201718748,2.8192832659,1.6705779456  
C,0,-0.8678613864,1.6467609733,1.5320526119  
C,0,0.4612135406,1.6917948672,1.1040015183  
C,0,1.0133745016,2.9409912383,0.8017246326  
C,0,0.2689583863,4.110049239,0.9346709543  
C,0,1.2835802159,0.4391645219,0.9609807737  
H,0,-1.6298736599,4.9644069355,1.4896143906  
H,0,-2.6434408831,2.7615216472,2.0263576274  
H,0,-1.3170413041,0.6905822987,1.7831951761  
H,0,2.0430923986,2.9968954344,0.4625381449  
H,0,0.7223812511,5.0653577612,0.6972585031  
H,0,0.7693312762,-0.4247775538,1.3817373905  
H,0,2.2431601664,0.5470408534,1.469679154  
H,0,1.4966597485,0.2274835288,-0.0908620601  
N,0,-1.9778566204,2.1866716248,-1.0997378456  
O,0,-2.9340730768,1.6650537189,-0.8878720585  
O,0,-1.0526526175,2.7077309305,-1.4125059007  
F,0,-0.1563406008,-1.9412388022,-4.1168122754  
B,0,0.74116532,-2.0827322744,-3.0783366183  
F,0,0.7103774606,-0.9489432756,-2.2926850151  
F,0,0.3959741312,-3.1799770832,-2.3172504464  
F,0,2.010840368,-2.2549157637,-3.5887311632

### Pi Complex NO<sub>2</sub>BF<sub>4</sub> PCM ONIOM 3.237\_93813

ONIOM(M062X/6-311G\*:PM3)  
E(RPM3) = 0.267722282933

Zero-point correction= 0.157963 (Hartree/Particle)  
Thermal correction to Energy= 0.175049  
Thermal correction to Enthalpy= 0.175993  
Thermal correction to Gibbs Free Energy= 0.108305  
Sum of electronic and ZPE= -476.888476  
Sum of electronic and thermal Energies= -476.871391  
Sum of electronic and thermal Enthalpies= -476.870447  
Sum of electronic and thermal Free Energies= -476.938134

| E             | CV        | S         |
|---------------|-----------|-----------|
| KCal/Mol      | Cal/Mol-K | Cal/Mol-K |
| Total 109.845 | 55.627    | 142.461   |

C,0,0.6663989496,-1.3513628322,-0.2853246724  
C,0,1.8549539536,-1.7321199654,-0.9037473934  
C,0,3.0743952811,-1.2359593787,-0.4481391532  
C,0,3.138174701,-0.351966005,0.6327837553  
C,0,1.9391925505,0.0350633139,1.237397559  
C,0,0.7113760922,-0.4635521206,0.7862299477  
C,0,4.4644135666,0.1452774289,1.1424084244  
H,0,-0.2867139583,-1.7353304325,-0.633748589  
H,0,1.8337520494,-2.4167454503,-1.7436452761  
H,0,3.9930606829,-1.5425277416,-0.9377770501  
H,0,1.9610753753,0.7162920932,2.0826933331  
H,0,-0.208412204,-0.1610242721,1.2791811411  
H,0,4.9431079174,-0.6191513964,1.7592813552  
H,0,4.3464656687,1.039761477,1.7547055536  
H,0,5.1438704715,0.3744761654,0.3201189102  
N,0,1.1914638367,1.7840228637,-0.8996660064  
O,0,1.7262247773,1.1811950007,-1.659367728

O,0,0.6536187486,2.4790755745,-0.2215541965  
 F,0,-4.330804864,-0.9166815279,0.8657521579  
 B,0,-3.5359642363,-0.2386710254,-0.0341219849  
 F,0,-2.6384814015,0.5558792677,0.6493863525  
 F,0,-2.85104459,-1.1440903116,-0.8181310962  
 F,0,-4.3239253685,0.5574842749,-0.839726344

### Pi Complex NO2BF4 PCM ONIOM 3.238\_93914

ONIOM(M062X/6-311G\*:PM3)

E(RPM3) = 0.267135462019

Zero-point correction= 0.157588 (Hartree/Particle)  
 Thermal correction to Energy= 0.174781  
 Thermal correction to Enthalpy= 0.175725  
 Thermal correction to Gibbs Free Energy= 0.107245  
 Sum of electronic and ZPE= -476.888804  
 Sum of electronic and thermal Energies= -476.871611  
 Sum of electronic and thermal Enthalpies= -476.870667  
 Sum of electronic and thermal Free Energies= -476.939147

| E             | CV        | S         |
|---------------|-----------|-----------|
| KCal/Mol      | Cal/Mol-K | Cal/Mol-K |
| Total 109.677 | 55.766    | 144.129   |

C,0,0.4274386204,-1.1069622223,-0.1144211646  
 C,0,0.9577926224,-0.3352574582,-1.1443932856  
 C,0,2.3365310801,-0.1028282145,-1.2128891135  
 C,0,3.2045754605,-0.6419382662,-0.2593031274  
 C,0,2.6538535471,-1.4035467714,0.7753252289  
 C,0,1.2823593516,-1.6360170943,0.8495887154  
 C,0,4.6927518475,-0.4385900538,-0.356285357  
 H,0,-0.643832679,-1.2783205509,-0.0598823284  
 H,0,0.3009444366,0.0798136111,-1.9020399449  
 H,0,2.7397278156,0.4877070569,-2.0301861094  
 H,0,3.3098572333,-1.8222843551,1.5315973516  
 H,0,0.8810376736,-2.2298577825,1.6625786213  
 H,0,4.9396084406,0.4132247572,-0.9903176111  
 H,0,5.1659290916,-1.3231860665,-0.7896856204  
 H,0,5.1360182387,-0.2797218654,0.6279839958  
 N,0,1.332634257,1.9331701445,0.5382230464  
 O,0,1.4674108948,1.313139337,1.4456931796  
 O,0,1.1899401716,2.6517877823,-0.2958661866  
 F,0,-2.983209786,-0.88747786,0.9444091191  
 B,0,-3.550858468,-0.1302129195,-0.0595812832  
 F,0,-4.3575203034,-0.930408263,-0.8409365738  
 F,0,-4.3057471295,0.8785556281,0.5034433632  
 F,0,-2.560128417,0.4275164267,-0.8414599153

### Pi Complex NO2BF4 PCM ONIOM 3.242\_93631

ONIOM(M062X/6-311G\*:PM3)

E(RPM3) = 0.276080899456

Zero-point correction= 0.158860 (Hartree/Particle)  
 Thermal correction to Energy= 0.175272  
 Thermal correction to Enthalpy= 0.176216  
 Thermal correction to Gibbs Free Energy= 0.113061

Sum of electronic and ZPE= -476.890517  
 Sum of electronic and thermal Energies= -476.874105  
 Sum of electronic and thermal Enthalpies= -476.873161  
 Sum of electronic and thermal Free Energies= -476.936316

| E             | CV        | S         |
|---------------|-----------|-----------|
| KCal/Mol      | Cal/Mol-K | Cal/Mol-K |
| Total 109.985 | 55.421    | 132.920   |

C,0,-0.5245200261,0.0170458747,3.6629926804  
 C,0,-0.6344555357,1.211088942,2.9540499914  
 C,0,-1.8619322273,1.6054477412,2.4255641138  
 C,0,-3.0072673517,0.8225136516,2.59109031  
 C,0,-2.8828136823,-0.3839696236,3.2861081311  
 C,0,-1.6515852678,-0.7831316939,3.8246792482  
 C,0,-4.334940906,1.2835765865,2.0525581942  
 H,0,0.4296967289,-0.3019616237,4.065202145  
 H,0,0.2379896218,1.8370362079,2.8088457663  
 H,0,-1.9324907692,2.5377743775,1.8751148836  
 H,0,-3.7557124873,-1.014312225,3.4257982241  
 H,0,-1.5720468917,-1.7309121195,4.3521981111  
 H,0,-4.7419262857,2.0772850766,2.6835580394  
 H,0,-5.0615755834,0.4714261142,2.0283165174  
 H,0,-4.2326002897,1.6884473056,1.0443849349  
 N,0,-1.6349317234,-1.7218758998,1.1610963777  
 O,0,-2.1672128407,-2.6723129423,1.3798029591  
 O,0,-1.062460227,-0.8429176748,0.7931148475  
 F,0,-1.2557412541,-3.9559135114,2.78663395  
 B,0,0.0838516166,-3.8351287792,3.1138925087  
 F,0,0.5373701309,-2.6927502968,2.4732114485  
 F,0,0.2276440327,-3.7083541248,4.4754533965  
 F,0,0.7808738183,-4.9301917627,2.6606032213

### Pi Complex NO2BF4 PCM ONIOM 3.245\_94016

ONIOM(M062X/6-311G\*:PM3)

E(RPM3) = 0.272037025824

Zero-point correction= 0.157778 (Hartree/Particle)  
 Thermal correction to Energy= 0.174707  
 Thermal correction to Enthalpy= 0.175651  
 Thermal correction to Gibbs Free Energy= 0.108993  
 Sum of electronic and ZPE= -476.891383  
 Sum of electronic and thermal Energies= -476.874454  
 Sum of electronic and thermal Enthalpies= -476.873510  
 Sum of electronic and thermal Free Energies= -476.940168

| E             | CV        | S         |
|---------------|-----------|-----------|
| KCal/Mol      | Cal/Mol-K | Cal/Mol-K |
| Total 109.630 | 55.753    | 140.294   |

C,0,2.2781453036,3.569273213,-0.4487834135  
 C,0,1.4978144028,3.3774687387,0.6894590925  
 C,0,1.8749037338,2.4431162331,1.650800787  
 C,0,3.0361101845,1.6783666974,1.5014217943  
 C,0,3.8059670989,1.871176341,0.3518356553  
 C,0,3.4331830179,2.8112214751,-0.6168205334  
 C,0,3.4256393111,0.6668908051,2.5462941689  
 H,0,1.9911515382,4.3012848399,-1.1939093438  
 H,0,0.5934202372,3.9577952027,0.8306916252

H,0,1.2590852613,2.3040596917,2.5337765819  
 H,0,4.717397147,1.2966616568,0.215769742  
 H,0,4.0579743954,2.9567187252,-1.4916189805  
 H,0,4.435094453,0.2907727615,2.3795772085  
 H,0,2.7407613352,-0.1851358985,2.5369750748  
 H,0,3.3835498743,1.1057228171,3.5445518115  
 N,0,1.9539530669,0.4650841757,-1.3385892038  
 O,0,2.7537869887,0.115489489,-2.0253908819  
 O,0,1.0886367047,0.7421071387,-0.7050807568  
 F,0,0.4407055041,-3.907431084,-2.4398577643  
 B,0,0.7954792373,-3.3596021189,-1.2267926384  
 F,0,0.9683053184,-1.9934626807,-1.3793249474  
 F,0,-0.197083883,-3.5923463717,-0.3001326903  
 F,0,1.9775047685,-3.9168295479,-0.7893171877

### Pi Complex NO2BF4 PCM ONIOM 3.247\_94177

ONIOM(M062X/6-311G\*:PM3)  
 E(RPM3) = 0.266265816368

Zero-point correction= 0.157332 (Hartree/Particle)  
 Thermal correction to Energy= 0.174759  
 Thermal correction to Enthalpy= 0.175704  
 Thermal correction to Gibbs Free Energy= 0.103994  
 Sum of electronic and ZPE= -476.888438  
 Sum of electronic and thermal Energies= -476.871011  
 Sum of electronic and thermal Enthalpies= -476.870067  
 Sum of electronic and thermal Free Energies= -476.941777

| E             | CV        | S         |
|---------------|-----------|-----------|
| KCal/Mol      | Cal/Mol-K | Cal/Mol-K |
| Total 109.663 | 55.860    | 150.926   |

C,0,-0.3822921097,-1.721830326,-3.2582543068  
 C,0,-0.6183366755,-0.3854088187,-3.5681832964  
 C,0,-0.0158341661,0.6297559932,-2.8154552634  
 C,0,0.834323189,0.3260072465,-1.7498689759  
 C,0,1.0548029522,-1.0216762297,-1.4468081162  
 C,0,0.4560611736,-2.0351484761,-2.1901896536  
 C,0,1.5106711579,1.4090793662,-0.9524333367  
 H,0,-0.8435681303,-2.5084780767,-3.8430922843  
 H,0,-1.2622235815,-0.1248757043,-4.4015894479  
 H,0,-0.1975336652,1.6682750395,-3.0757085567  
 H,0,1.7076604648,-1.2790260638,-0.6186017814  
 H,0,0.6452265881,-3.0715486264,-1.9354986007  
 H,0,1.1205542018,2.3946066676,-1.2070417205  
 H,0,2.5852809364,1.4112697377,-1.1491142059  
 H,0,1.3762901079,1.250933559,0.1195337951  
 N,0,-2.4219556076,-0.0536719241,-1.3599804112  
 O,0,-1.8667142432,-0.7508207122,-0.703451483  
 O,0,-3.055609469,0.6408881834,-1.9493333302  
 F,0,-5.8769339257,1.4560727858,3.8574906321  
 B,0,-5.9597874586,1.2753780245,2.4930012681  
 F,0,-7.2136219143,1.6426927191,2.0515087602  
 F,0,-5.0072044253,2.0530330785,1.8668705074  
 F,0,-5.7373760999,-0.052165543,2.188942708

### Pi Complex NO2BF4 PCM ONIOM 3.248\_93896

ONIOM(M062X/6-311G\*:PM3)  
 E(RPM3) = 0.275067786382

Zero-point correction= 0.158745 (Hartree/Particle)  
 Thermal correction to Energy= 0.175238  
 Thermal correction to Enthalpy= 0.176182  
 Thermal correction to Gibbs Free Energy= 0.112467  
 Sum of electronic and ZPE= -476.892687  
 Sum of electronic and thermal Energies= -476.876194  
 Sum of electronic and thermal Enthalpies= -476.875250  
 Sum of electronic and thermal Free Energies= -476.938965

| E             | CV        | S         |
|---------------|-----------|-----------|
| KCal/Mol      | Cal/Mol-K | Cal/Mol-K |
| Total 109.964 | 55.489    | 134.101   |

C,0,3.5249535956,-0.291063291,-0.3771040656  
 C,0,3.0036475868,0.6705888164,-1.2390925997  
 C,0,1.928923396,1.4651535649,-0.842961387  
 C,0,1.3494502361,1.3203605984,0.4204715227  
 C,0,1.8740310426,0.3445688833,1.2740381407  
 C,0,2.95465938,-0.4554579821,0.8817237979  
 C,0,0.1763112019,2.165886544,0.8370132903  
 H,0,4.36690136,-0.9013633945,-0.679888728  
 H,0,3.4365282365,0.80706279,-2.223214615  
 H,0,1.5353419105,2.211547304,-1.5252566836  
 H,0,1.4471169667,0.2177244852,2.2647490382  
 H,0,3.3550999553,-1.1906370116,1.5712560955  
 H,0,0.1042123026,2.2352022605,1.9226117232  
 H,0,-0.7638403567,1.7380288385,0.4673881845  
 H,0,0.2565856946,3.1744839512,0.4306899611  
 N,0,0.6448645055,-1.7695106898,-0.1114779477  
 O,0,0.4791952207,-2.3559668065,0.8185844365  
 O,0,0.7278215631,-1.2898037873,-1.1074020655  
 F,0,-3.8941655918,-0.8027882436,-0.4290584879  
 B,0,-2.8588254925,0.0512565423,-0.1174553582  
 F,0,-1.7374973577,-0.7006044168,0.2007285717  
 F,0,-2.5773058449,0.8485773679,-1.2052922515  
 F,0,-3.2098125109,0.8328846766,0.9609254272

### Pi Complex NO2BF4 PCM ONIOM 3.254\_94079

ONIOM(M062X/6-311G\*:PM3)  
 E(RPM3) = 0.265925774039

Zero-point correction= 0.157622 (Hartree/Particle)  
 Thermal correction to Energy= 0.174936  
 Thermal correction to Enthalpy= 0.175881  
 Thermal correction to Gibbs Free Energy= 0.104925  
 Sum of electronic and ZPE= -476.888102  
 Sum of electronic and thermal Energies= -476.870787  
 Sum of electronic and thermal Enthalpies= -476.869843  
 Sum of electronic and thermal Free Energies= -476.940798

| E             | CV        | S         |
|---------------|-----------|-----------|
| KCal/Mol      | Cal/Mol-K | Cal/Mol-K |
| Total 109.774 | 55.769    | 149.338   |

C,0,3.425335309,-1.722943777,0.628501027  
 C,0,3.4320424318,-1.301367379,-0.6978954169  
 C,0,3.4971661006,0.0636655271,-1.00352267  
 C,0,3.561505987,1.0236379051,0.0085249099  
 C,0,3.5460059187,0.5835382661,1.3362941534  
 C,0,3.4795385607,-0.771990587,1.6458627619  
 C,0,3.6503955642,2.4932834664,-0.3051271248  
 H,0,3.3808797429,-2.7790352325,0.8659213947  
 H,0,3.3997317836,-2.0299688209,-1.5010045214  
 H,0,3.5161913015,0.3795509575,-2.0423409929  
 H,0,3.5898606084,1.3148748894,2.1373560475  
 H,0,3.4707952957,-1.0871898989,2.6828631083  
 H,0,2.8375045568,3.0452254719,0.1719963793  
 H,0,3.6057147055,2.6756491674,-1.3786634052  
 H,0,4.5882321116,2.9083581802,0.0704779821  
 N,0,0.6764390983,-0.4607364284,-0.5713768408  
 O,0,0.5073087809,-0.7640459326,-1.6251506491  
 O,0,0.7489276069,-0.1491848529,0.4882048653  
 F,0,-3.9026291587,-0.8725008469,-0.5527363097  
 B,0,-4.6939316473,0.0801266036,0.0561465217  
 F,0,-5.3081797088,0.8504277576,-0.9089444282  
 F,0,-5.6489287313,-0.5422146453,0.832001942  
 F,0,-3.9066922179,0.885476209,0.853495266

### Pi Complex NO2BF4 PCM ONIOM 3.256\_93794

ONIOM(M062X/6-311G\*:PM3)  
 E(RPM3) = 0.267615559467

Zero-point correction= 0.158233 (Hartree/Particle)  
 Thermal correction to Energy= 0.175190  
 Thermal correction to Enthalpy= 0.176134  
 Thermal correction to Gibbs Free Energy= 0.109174  
 Sum of electronic and ZPE= -476.888887  
 Sum of electronic and thermal Energies= -476.871930  
 Sum of electronic and thermal Enthalpies= -476.870986  
 Sum of electronic and thermal Free Energies= -476.937945

| E             | CV        | S         |
|---------------|-----------|-----------|
| KCal/Mol      | Cal/Mol-K | Cal/Mol-K |
| Total 109.933 | 55.587    | 140.929   |

C,0,-3.708791379,-0.3555545686,0.5158990411  
 C,0,-3.2939669549,0.0264731199,-0.7559680974  
 C,0,-2.0662136553,-0.4212478995,-1.2597075  
 C,0,-1.2410230952,-1.2616253645,-0.5069426738  
 C,0,-1.6684501771,-1.6259386684,0.7736488876  
 C,0,-2.8863314306,-1.1800721434,1.2812999611  
 C,0,0.0729195539,-1.7578270393,-1.0478219027  
 H,0,-4.661392756,-0.0171504063,0.9050982881  
 H,0,-3.9272096378,0.6583717945,-1.3693202405  
 H,0,-1.7615517305,-0.1308223094,-2.2607462243  
 H,0,-1.0403374095,-2.2727986011,1.378161719  
 H,0,-3.1956377745,-1.4818600778,2.2751209581  
 H,0,0.156301709,-1.5731040201,-2.1188705378  
 H,0,0.1814756898,-2.8299463287,-0.876533873  
 H,0,0.9184505283,-1.264114552,-0.5541394814  
 N,0,-1.3969890213,1.9197703666,0.2222704431  
 O,0,-1.4773767508,2.564008089,-0.678441976

O,0,-1.2681291724,1.373782008,1.176964389  
 F,0,2.4822248341,-0.1288853649,1.196700436  
 B,0,3.2795267076,0.0491583139,0.0844172341  
 F,0,4.4358347281,0.7024439293,0.4583474173  
 F,0,3.5998474614,-1.1738999126,-0.4660927913  
 F,0,2.6080857328,0.8168276353,-0.8460874763

### Pi Complex NO2BF4 PCM ONIOM 3.261\_94154

ONIOM(M062X/6-311G\*:PM3)  
 E(RPM3) = 0.267181450224

Zero-point correction= 0.157401 (Hartree/Particle)  
 Thermal correction to Energy= 0.174735  
 Thermal correction to Enthalpy= 0.175679  
 Thermal correction to Gibbs Free Energy= 0.104682  
 Sum of electronic and ZPE= -476.888823  
 Sum of electronic and thermal Energies= -476.871489  
 Sum of electronic and thermal Enthalpies= -476.870544  
 Sum of electronic and thermal Free Energies= -476.941542

| E             | CV        | S         |
|---------------|-----------|-----------|
| KCal/Mol      | Cal/Mol-K | Cal/Mol-K |
| Total 109.648 | 55.831    | 149.426   |

C,0,1.8632498918,-0.5860276355,4.873613152  
 C,0,0.484904449,-0.5805771256,5.0622245772  
 C,0,-0.144762111,-1.6642205899,5.6874849107  
 C,0,0.5914845912,-2.7623299104,6.1393055769  
 C,0,1.9747600455,-2.7558647477,5.9318945489  
 C,0,2.6053377437,-1.6830705119,5.3078583129  
 C,0,-0.0705433643,-3.9233474666,6.831510365  
 H,0,2.3542042082,0.2534246816,4.3964281956  
 H,0,-0.1066311858,0.2696429091,4.7404723569  
 H,0,-1.2193111478,-1.6400274148,5.8430065994  
 H,0,2.5647676024,-3.6029931006,6.2674750068  
 H,0,3.6791724501,-1.7031367012,5.1621840222  
 H,0,0.3432440021,-4.058591774,7.8328765772  
 H,0,0.0957045464,-4.855393965,6.2846119845  
 H,0,-1.145434657,-3.770731623,6.927345992  
 N,0,0.0172034908,-2.4562767681,2.9420023376  
 O,0,1.0196766563,-2.9108347448,3.0604039803  
 O,0,-0.9920195571,-2.0511763435,2.718943705  
 F,0,0.0098477318,-6.829550885,2.8644119663  
 B,0,-0.718200767,-7.6106895596,3.7387268088  
 F,0,-0.0920957164,-8.8286516678,3.8986942441  
 F,0,-0.8060096819,-6.970795258,4.9576576562  
 F,0,-1.9860786208,-7.8027310978,3.2300465234

### Pi Complex NO2BF4 PCM ONIOM 3.270\_93741

ONIOM(M062X/6-311G\*:PM3)  
 E(RPM3) = 0.266875078925

Zero-point correction= 0.158228 (Hartree/Particle)  
 Thermal correction to Energy= 0.175144  
 Thermal correction to Enthalpy= 0.176088  
 Thermal correction to Gibbs Free Energy= 0.109002

Sum of electronic and ZPE= -476.888187  
 Sum of electronic and thermal Energies= -476.871270  
 Sum of electronic and thermal Enthalpies= -476.870326  
 Sum of electronic and thermal Free Energies= -476.937412

E CV S  
 KCal/Mol Cal/Mol-K Cal/Mol-K  
 Total 109.904 55.594 141.194

C,0,1.8330917235,-0.6380460466,-4.5977882386  
 C,0,1.1600159759,-1.856601104,-4.5820069289  
 C,0,-0.1949869393,-1.908903089,-4.2588732926  
 C,0,-0.908126644,-0.7492258692,-3.9455392555  
 C,0,-0.2181380454,0.4678722053,-3.948354176  
 C,0,1.1403222368,0.5265284132,-4.2770675779  
 C,0,-2.3826179088,-0.8003639275,-3.6479843865  
 H,0,2.8843735903,-0.5949253592,-4.8557354846  
 H,0,1.6896427225,-2.7709897925,-4.8226373585  
 H,0,-0.7068893789,-2.8656295485,-4.252920099  
 H,0,-0.7519653182,1.3836273999,-3.7105582243  
 H,0,1.6486788215,1.4845640444,-4.2914311427  
 H,0,-2.6783935664,-0.0132941492,-2.9514261636  
 H,0,-2.6703943538,-1.7636195609,-3.2257941888  
 H,0,-2.9565637419,-0.6576427601,-4.5671456037  
 N,0,1.1111686223,-0.0636534476,-1.4603376231  
 O,0,1.203021374,-1.1492619782,-1.6575217171  
 O,0,1.0548056519,1.0027731063,-1.1578734211  
 F,0,-3.9459674603,1.6370161991,1.4235012149  
 B,0,-3.6060497899,0.500016731,0.7210415667  
 F,0,-3.4384563324,0.8154202095,-0.6117258241  
 F,0,-2.4249017525,-0.0118108924,1.2191424155  
 F,0,-4.6042395869,-0.4425493836,0.8508280094

### Pi Complex NO<sub>2</sub>BF<sub>4</sub> PCM ONIOM 3.276\_94050

file  
 E(RPM3) = 0.273363507590

Zero-point correction= 0.158064 (Hartree/Particle)  
 Thermal correction to Energy= 0.175049  
 Thermal correction to Enthalpy= 0.175993  
 Thermal correction to Gibbs Free Energy= 0.109095  
 Sum of electronic and ZPE= -476.891538  
 Sum of electronic and thermal Energies= -476.874553  
 Sum of electronic and thermal Enthalpies= -476.873609  
 Sum of electronic and thermal Free Energies= -476.940507

E CV S  
 KCal/Mol Cal/Mol-K Cal/Mol-K  
 Total 109.845 55.731 140.800

### Pi Complex NO<sub>2</sub>BF<sub>4</sub> PCM ONIOM 3.283\_94088

ONIOM(M062X/6-311G\*:PM3)  
 E(RPM3) = 0.265866408341

Zero-point correction= 0.157384 (Hartree/Particle)

Thermal correction to Energy= 0.174727  
 Thermal correction to Enthalpy= 0.175671  
 Thermal correction to Gibbs Free Energy= 0.104736  
 Sum of electronic and ZPE= -476.888238  
 Sum of electronic and thermal Energies= -476.870895  
 Sum of electronic and thermal Enthalpies= -476.869951  
 Sum of electronic and thermal Free Energies= -476.940886

E CV S  
 KCal/Mol Cal/Mol-K Cal/Mol-K  
 Total 109.643 55.832 149.296

C,0,-2.9038078398,-1.9702470564,-0.3773982697  
 C,0,-3.3169064663,-1.6348291921,0.9097827279  
 C,0,-3.7810815293,-0.3510004836,1.187637706  
 C,0,-3.8459789644,0.6258622926,0.1900001665  
 C,0,-3.4162107602,0.2825981417,-1.0952517632  
 C,0,-2.9521189735,-1.0059182524,-1.380524605  
 C,0,-4.391855161,1.9972599219,0.4857064058  
 H,0,-2.5468185102,-2.9694957416,-0.5961049428  
 H,0,-3.2749436684,-2.3737181866,1.7017837261  
 H,0,-4.0992465898,-0.1032588549,2.1952847049  
 H,0,-3.4625042021,1.0225803709,-1.8889868725  
 H,0,-2.6398197938,-1.2526060449,-2.3897514817  
 H,0,-4.1231873763,2.3234778627,1.4913771294  
 H,0,-5.4829596702,1.9903562278,0.4231203877  
 H,0,-4.0248490177,2.7354312809,-0.2282083332  
 N,0,-0.626197699,0.395276516,-0.3722794947  
 O,0,-0.8203743693,0.0596578695,0.6644734691  
 O,0,-0.33991566,0.7576099764,-1.3812419393  
 F,0,4.7689409187,0.6702141974,-1.0391548319  
 B,0,4.6907398998,0.0432035298,0.1872202617  
 F,0,3.7441199936,-0.9593397743,0.1293807516  
 F,0,5.9161021496,-0.4994722148,0.5109560691  
 F,0,4.3217042898,0.9622656139,1.1480820282

### Pi Complex NO<sub>2</sub>BF<sub>4</sub> PCM ONIOM 3.283\_94208

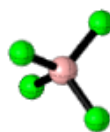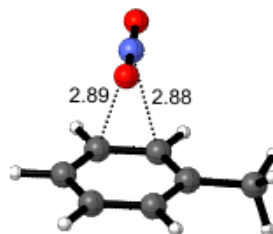

ONIOM(M062X/6-311G\*:PM3)  
 E(RPM3) = 0.266064245120

Zero-point correction= 0.157474 (Hartree/Particle)  
 Thermal correction to Energy= 0.174973

Thermal correction to Enthalpy= 0.175917  
 Thermal correction to Gibbs Free Energy= 0.103642  
 Sum of electronic and ZPE= -476.888250  
 Sum of electronic and thermal Energies= -476.870751  
 Sum of electronic and thermal Enthalpies= -476.869807  
 Sum of electronic and thermal Free Energies= -476.942082

E CV S  
 KCal/Mol Cal/Mol-K Cal/Mol-K  
 Total 109.797 55.812 152.115

C,0,-3.2821416793,-1.9099712114,-0.0495288547  
 C,0,-3.2511819427,-1.1456738265,1.113328822  
 C,0,-3.463393069,0.2366361793,1.0522692611  
 C,0,-3.7154661462,0.8735379249,-0.1657556704  
 C,0,-3.7316640781,0.0925642537,-1.3257693752  
 C,0,-3.5191705835,-1.2826958671,-1.2710176684  
 C,0,-3.9867736581,2.3527708885,-0.2315840729  
 H,0,-3.1221005292,-2.9804987698,-0.0051957278  
 H,0,-3.0753153105,-1.6197955256,2.0730680447  
 H,0,-3.4517871973,0.8207275979,1.9678191384  
 H,0,-3.913959649,0.5691935336,-2.2837574349  
 H,0,-3.5371699864,-1.8656187484,-2.1846645116  
 H,0,-5.0550024649,2.5353661542,-0.3715765618  
 H,0,-3.4645065417,2.8147748285,-1.0710979256  
 H,0,-3.6809345593,2.855981414,0.6859481598  
 N,0,-0.6514952715,-0.0266776263,0.5099307724  
 O,0,-0.8107934822,-0.1496979432,-0.5785235322  
 O,0,-0.3909074041,0.1107454837,1.5798409583  
 F,0,3.7754863154,0.6876935651,-0.8964249574  
 B,0,4.7198369729,0.0476315636,-0.1200725995  
 F,0,5.5170377843,-0.7403443378,-0.9233234465  
 F,0,5.4959376166,0.986580642,0.5262157847  
 F,0,4.0829828636,-0.744455173,0.8132993976

### Pi Complex NO2BF4 PCM ONIOM 3.289\_93970

ONIOM(M062X/6-311G\*:PM3)  
 E(RPM3) = 0.265951522336

Zero-point correction= 0.157904 (Hartree/Particle)  
 Thermal correction to Energy= 0.175175  
 Thermal correction to Enthalpy= 0.176120  
 Thermal correction to Gibbs Free Energy= 0.106005  
 Sum of electronic and ZPE= -476.887805  
 Sum of electronic and thermal Energies= -476.870534  
 Sum of electronic and thermal Enthalpies= -476.869590  
 Sum of electronic and thermal Free Energies= -476.939704

E CV S  
 KCal/Mol Cal/Mol-K Cal/Mol-K  
 Total 109.924 55.714 147.568

C,0,1.241798972,1.0525571351,-3.4186581415  
 C,0,1.3243043442,2.431982516,-3.252009379  
 C,0,2.5487530395,3.028774545,-2.9304489463  
 C,0,3.7077250032,2.2615856063,-2.7803874794  
 C,0,3.604460384,0.8765066587,-2.9403640808  
 C,0,2.3876377154,0.2768248236,-3.2564454015  
 C,0,5.0353740273,2.9064744945,-2.4843611596

H,0,0.2964240757,0.5875320494,-3.6711027601  
 H,0,0.4428476062,3.050788378,-3.3820175478  
 H,0,2.6046741899,4.107452576,-2.8153919031  
 H,0,4.4894567402,0.2605249827,-2.817175742  
 H,0,2.3340330942,-0.79914316,-3.375895389  
 H,0,5.6180862336,3.008706474,-3.4032597631  
 H,0,5.6224760203,2.3043331428,-1.7892508909  
 H,0,4.9096620552,3.9028397673,-2.0596741312  
 N,0,1.4999120489,2.257305761,-0.3680999651  
 O,0,1.9306332577,1.2384725216,-0.4178547847  
 O,0,1.0451048506,3.2578294776,-0.2174581243  
 F,0,3.1265811835,6.3908005569,4.4151143966  
 B,0,2.2302347926,6.0552387474,3.4223106267  
 F,0,2.0135320505,4.6923454087,3.4405260046  
 F,0,1.0362743522,6.7124955372,3.6331550999  
 F,0,2.7456598628,6.4198019003,2.1954836617

### Pi Complex NO2BF4 PCM ONIOM 3.296\_93743

ONIOM(M062X/6-311G\*:PM3)  
 E(RPM3) = 0.278823983601

Zero-point correction= 0.158995 (Hartree/Particle)  
 Thermal correction to Energy= 0.175310  
 Thermal correction to Enthalpy= 0.176255  
 Thermal correction to Gibbs Free Energy= 0.113001  
 Sum of electronic and ZPE= -476.891442  
 Sum of electronic and thermal Energies= -476.875127  
 Sum of electronic and thermal Enthalpies= -476.874182  
 Sum of electronic and thermal Free Energies= -476.937436

E CV S  
 KCal/Mol Cal/Mol-K Cal/Mol-K  
 Total 110.009 55.298 133.128

C,0,1.8532104707,3.3914186689,-0.7992869791  
 C,0,1.1813012331,2.9801543081,0.3478140485  
 C,0,1.7632908503,2.0333559467,1.1986076572  
 C,0,3.027236593,1.4938907167,0.926738874  
 C,0,3.6800717101,1.9075692176,-0.2353400674  
 C,0,3.1011306402,2.8453678981,-1.0900544283  
 C,0,3.6691852608,0.523830436,1.8818573473  
 H,0,1.4084507747,4.12353082,-1.4620807223  
 H,0,0.2099523278,3.3958642396,0.5920857749  
 H,0,1.2370117252,1.7278808854,2.0985186908  
 H,0,4.6536261979,1.4932875918,-0.4756780646  
 H,0,3.6287031264,3.1492305855,-1.9867757001  
 H,0,4.2179982655,1.0663869859,2.6556834346  
 H,0,4.3757383086,-0.1302781317,1.3700819734  
 H,0,2.9233246322,-0.0961927068,2.3818406351  
 N,0,0.5357478833,0.3719741515,-0.6739207616  
 O,0,1.3030070977,0.4999792936,-1.4645780635  
 O,0,-0.3010715895,0.1422072857,0.0228914227  
 F,0,1.791872477,-3.5104202189,-1.9824985142  
 B,0,0.8714671522,-2.9030246095,-1.1623467655  
 F,0,0.0694403782,-2.0437902341,-1.8940398302  
 F,0,0.0974224306,-3.8470007958,-0.5307336101  
 F,0,1.5158739541,-2.1127416345,-0.2242362514

### Pi Complex NO<sub>2</sub>BF<sub>4</sub> PCM ONIOM 3.302\_93903

ONIOM(M062X/6-311G\*:PM3)  
E(RPM3) = 0.266382473702

Zero-point correction= 0.157948 (Hartree/Particle)  
Thermal correction to Energy= 0.175123  
Thermal correction to Enthalpy= 0.176067  
Thermal correction to Gibbs Free Energy= 0.107173  
Sum of electronic and ZPE= -476.888265  
Sum of electronic and thermal Energies= -476.871090  
Sum of electronic and thermal Enthalpies= -476.870146  
Sum of electronic and thermal Free Energies= -476.939039

| E             | CV        | S         |
|---------------|-----------|-----------|
| KCal/Mol      | Cal/Mol-K | Cal/Mol-K |
| Total 109.891 | 55.679    | 144.998   |

C,0,3.8961618877,-3.9854246303,0.381193286  
C,0,4.6652612052,-2.8591674481,0.6620799779  
C,0,4.5333371865,-2.2029490087,1.8849112502  
C,0,3.6349840108,-2.6553225098,2.8538024541  
C,0,2.8557445741,-3.7788624378,2.5549653955  
C,0,2.9864848295,-4.4430560411,1.3312229468  
C,0,3.5277984705,-1.9746412817,4.1919117626  
H,0,4.0021084413,-4.4992752945,-0.5664664813  
H,0,5.3704984036,-2.4874155018,-0.0720943186  
H,0,5.1391198575,-1.3262829618,2.0904010423  
H,0,2.153883547,-4.1525195967,3.2951667719  
H,0,2.3841887246,-5.3225069998,1.1302858197  
H,0,3.8241908999,-0.9270971653,4.1297536505  
H,0,4.1836882514,-2.4622119776,4.9175468039  
H,0,2.5105526195,-2.0215495693,4.5855545901  
N,0,1.098618489,-2.2935594592,0.8491833191  
O,0,1.9065918341,-1.6375205815,0.4721336778  
O,0,0.2186566512,-2.8851087153,1.1768891123  
F,0,0.6086899595,2.273221099,5.2328650239  
B,0,0.0597724779,1.0964116549,4.7689270881  
F,0,-1.161371971,0.8840078026,5.3738879535  
F,0,-0.11438923,1.1784151343,3.4022244002  
F,0,0.9042349802,0.0447507896,5.0588406734

### Pi Complex NO<sub>2</sub>BF<sub>4</sub> PCM ONIOM 3.319\_94023

ONIOM(M062X/6-311G\*:PM3)  
E(RPM3) = 0.266855800930

Zero-point correction= 0.158045 (Hartree/Particle)  
Thermal correction to Energy= 0.175335  
Thermal correction to Enthalpy= 0.176279  
Thermal correction to Gibbs Free Energy= 0.105622  
Sum of electronic and ZPE= -476.887813  
Sum of electronic and thermal Energies= -476.870523  
Sum of electronic and thermal Enthalpies= -476.869579  
Sum of electronic and thermal Free Energies= -476.940236

| E             | CV        | S         |
|---------------|-----------|-----------|
| KCal/Mol      | Cal/Mol-K | Cal/Mol-K |
| Total 110.024 | 55.679    | 148.710   |

C,0,-1.3817621703,-1.7195658655,-0.3056386346  
C,0,-2.3341081933,-1.8821994355,0.6984735157  
C,0,-3.4617434,-1.0656099306,0.7371504442  
C,0,-3.6674302226,-0.0696101546,-0.222089783  
C,0,-2.701298985,0.0915631611,-1.2196151804  
C,0,-1.566832466,-0.7274216687,-1.2644352941  
C,0,-4.8870316867,0.8116733591,-0.1628693936  
H,0,-0.5078220948,-2.3590937164,-0.3420712656  
H,0,-2.2009475001,-2.650401368,1.4514565761  
H,0,-4.1991706156,-1.2079534281,1.5205850185  
H,0,-2.8444270518,0.8476044562,-1.9860135404  
H,0,-0.8403123935,-0.5958529921,-2.0592762385  
H,0,-5.776470275,0.2291542547,0.0813963174  
H,0,-5.0583855486,1.3179054626,-1.1128407326  
H,0,-4.7767634371,1.5761564632,0.6108612762  
N,0,-0.92077744,1.4516294727,0.5621616085  
O,0,-1.2269212131,0.8457186693,1.4366758605  
O,0,-0.5687060217,2.1276265574,-0.2443262001  
F,0,4.668625193,-1.0729110492,0.7313269688  
B,0,4.0676192874,-0.0941090705,-0.0318219594  
F,0,3.5223805939,0.8642810948,0.7983080018  
F,0,5.0034021024,0.4917069647,-0.8579831594  
F,0,3.0656665385,-0.6564562365,-0.7961432058

### Pi Complex NO<sub>2</sub>BF<sub>4</sub> PCM ONIOM 3.330\_94112

ONIOM(M062X/6-311G\*:PM3)  
E(RPM3) = 0.266691677891

Zero-point correction= 0.157728 (Hartree/Particle)  
Thermal correction to Energy= 0.175120  
Thermal correction to Enthalpy= 0.176064  
Thermal correction to Gibbs Free Energy= 0.104458  
Sum of electronic and ZPE= -476.887859  
Sum of electronic and thermal Energies= -476.870467  
Sum of electronic and thermal Enthalpies= -476.869523  
Sum of electronic and thermal Free Energies= -476.941128

| E             | CV        | S         |
|---------------|-----------|-----------|
| KCal/Mol      | Cal/Mol-K | Cal/Mol-K |
| Total 109.889 | 55.789    | 150.706   |

C,0,3.0320197987,-1.3799502638,-0.4393725728  
C,0,2.269843893,-0.409517411,0.2077324681  
C,0,1.9549205597,-0.5463353919,1.557632715  
C,0,2.3944101251,-1.6502041918,2.2937011599  
C,0,3.1479031603,-2.6245763297,1.6312581023  
C,0,3.4690159057,-2.4911139307,0.2755538355  
C,0,2.0823932058,-1.7693891545,3.7615866267  
H,0,3.2798110766,-1.2733871318,-1.4887477699  
H,0,1.9184100232,0.457042177,-0.3403608441  
H,0,1.3611342696,0.2176072203,2.0490393038  
H,0,3.5052275118,-3.4896497906,2.1825135602  
H,0,4.0675944755,-3.253009243,-0.2122188512  
H,0,2.1787541054,-2.798379042,4.1091264001  
H,0,1.0717440826,-1.4221064961,3.9810827628  
H,0,2.7730339061,-1.1561164563,4.3457725733  
N,0,0.8276041006,-3.7257859213,0.4131058798  
O,0,0.3434143075,-2.7451099253,0.2404387228

O,0,1.2144791052,-4.755037213,0.5634535341  
 F,0,1.6731385857,-6.2362816288,-2.9635981571  
 B,0,2.0522328216,-6.6896217868,-4.2105964289  
 F,0,1.682300315,-8.0110929338,-4.3479361273  
 F,0,1.4282319916,-5.932219741,-5.1802073123  
 F,0,3.4199173737,-6.573008314,-4.3462230808

### Pi Complex NO2BF4 PCM ONIOM 3.366\_94716

ONIOM(M062X/6-311G\*:PM3)  
 E(RPM3) = 0.312820301687

Zero-point correction= 0.158348 (Hartree/Particle)  
 Thermal correction to Energy= 0.174303  
 Thermal correction to Enthalpy= 0.175247  
 Thermal correction to Gibbs Free Energy= 0.112432  
 Sum of electronic and ZPE= -476.901252  
 Sum of electronic and thermal Energies= -476.885297  
 Sum of electronic and thermal Enthalpies= -476.884353  
 Sum of electronic and thermal Free Energies= -476.947167

| E             | CV        | S         |
|---------------|-----------|-----------|
| KCal/Mol      | Cal/Mol-K | Cal/Mol-K |
| Total 109.377 | 55.036    | 132.204   |

C,0,2.7691748733,-1.6212177632,-0.2947561509  
 C,0,1.8060982774,-1.3289340468,-1.2740571517  
 C,0,1.3163172761,-0.0519485052,-1.3795050563  
 C,0,1.7416609499,0.9579974986,-0.4579750947  
 C,0,2.8044544722,0.6486610873,0.4584201916  
 C,0,3.2920102813,-0.631887186,0.5473933723  
 C,0,1.344054745,2.3788346964,-0.6865888105  
 H,0,3.1298714946,-2.638771176,-0.1999726501  
 H,0,1.4519791506,-2.1114683416,-1.9317660663  
 H,0,0.5653517983,0.2022498349,-2.1205160129  
 H,0,3.1786871187,1.4374530936,1.1013973496  
 H,0,4.0591011889,-0.8817600473,1.2677378849  
 H,0,0.3156014306,2.4496515426,-1.0440244367  
 H,0,1.9979034433,2.7939939543,-1.4591985704  
 H,0,1.462750198,2.9811636608,0.2131275944  
 N,0,0.3814992246,0.3492199553,1.0287569629  
 O,0,-0.1676389057,1.3200944453,1.348075504  
 O,0,0.4072108143,-0.7794008259,1.2785478939  
 F,0,-2.3949306174,-0.4654751541,1.1301606625  
 B,0,-2.7432950669,-0.3071357142,-0.1972001517  
 F,0,-3.0331521385,-1.5300290953,-0.7580741592  
 F,0,-3.830651143,0.5293527983,-0.3034030676  
 F,0,-1.654039866,0.2550632884,-0.8414070372

### Pi Complex NO2BF4 PCM ONIOM 3.372\_94096

ONIOM(M062X/6-311G\*:PM3)  
 E(RPM3) = 0.279061853899

Zero-point correction= 0.158195 (Hartree/Particle)  
 Thermal correction to Energy= 0.174932  
 Thermal correction to Enthalpy= 0.175876  
 Thermal correction to Gibbs Free Energy= 0.109974

Sum of electronic and ZPE= -476.892744  
 Sum of electronic and thermal Energies= -476.876007  
 Sum of electronic and thermal Enthalpies= -476.875062  
 Sum of electronic and thermal Free Energies= -476.940965

| E             | CV        | S         |
|---------------|-----------|-----------|
| KCal/Mol      | Cal/Mol-K | Cal/Mol-K |
| Total 109.771 | 55.673    | 138.704   |

C,0,2.0012943262,3.6051234769,-0.6916612716  
 C,0,1.3472562672,3.2657179443,0.4867093558  
 C,0,1.8509047912,2.2408619644,1.2955702876  
 C,0,3.02254517,1.5521848426,0.9509779006  
 C,0,3.6624241208,1.9038027021,-0.2392528697  
 C,0,3.1585572511,2.9162199861,-1.0528406843  
 C,0,3.5813693166,0.4789177229,1.8459045569  
 H,0,1.614621817,4.3944621168,-1.3243088074  
 H,0,0.4490280045,3.7931681717,0.786674104  
 H,0,1.3366836434,1.9851825793,2.2176103043  
 H,0,4.5624063817,1.3756782853,-0.5360477888  
 H,0,3.671169338,3.1673862872,-1.9741150694  
 H,0,4.284460338,0.9097450873,2.5628751713  
 H,0,4.1150141851,-0.2774114156,1.2685250618  
 H,0,2.7923983288,-0.0182149624,2.4127671381  
 N,0,0.4595796396,0.6150398607,-0.4533720539  
 O,0,1.0792538477,0.8012786128,-1.3545957296  
 O,0,-0.2561111576,0.3306570111,0.3506732764  
 F,0,2.3522443741,-3.0663726001,-1.4008119397  
 B,0,1.3768188788,-2.5759548869,-0.565979282  
 F,0,0.3652833956,-1.9874003944,-1.3059584969  
 F,0,0.8671077946,-3.5825492718,0.2185541436  
 F,0,1.8955179476,-1.5681701204,0.2309896931

### Pi Complex NO2BF4 PCM ONIOM 3.382\_93727

ONIOM(M062X/6-311G\*:PM3)  
 E(RPM3) = 0.277518938346

Zero-point correction= 0.158344 (Hartree/Particle)  
 Thermal correction to Energy= 0.174923  
 Thermal correction to Enthalpy= 0.175876  
 Thermal correction to Gibbs Free Energy= 0.112043  
 Sum of electronic and ZPE= -476.890975  
 Sum of electronic and thermal Energies= -476.874395  
 Sum of electronic and thermal Enthalpies= -476.873451  
 Sum of electronic and thermal Free Energies= -476.937275

| E             | CV        | S         |
|---------------|-----------|-----------|
| KCal/Mol      | Cal/Mol-K | Cal/Mol-K |
| Total 109.766 | 55.659    | 134.329   |

C,0,-0.2639671368,0.1643744557,4.0367281044  
 C,0,-0.5501259024,1.3975450241,3.4532858604  
 C,0,-1.7926605863,1.6337005991,2.867780177  
 C,0,-2.7764878553,0.6450590339,2.8479260839  
 C,0,-2.4724948299,-0.5969441708,3.4260909304  
 C,0,-1.230648237,-0.834973727,4.0241571299  
 C,0,-4.1338321917,0.9065494255,2.2531728333  
 H,0,0.7047745643,-0.0172739407,4.4852450029  
 H,0,0.2000426923,2.1795398012,3.4501145739



H,0,-1.9982499821,2.5990242327,2.4181106741  
H,0,-3.2183043003,-1.3869376446,3.4166047231  
H,0,-1.0174362672,-1.8129016453,4.4479218484  
H,0,-4.8123894041,1.2882436715,3.0201460048  
H,0,-4.5759291449,-0.0055413079,1.8495440043  
H,0,-4.0813071619,1.6501604273,1.4576213456  
N,0,-1.1861916478,-1.2707077063,1.115413452  
O,0,-1.8542907265,-2.1491138702,0.9754786489  
O,0,-0.4414406185,-0.4448930381,1.084088348  
F,0,-1.4043597647,-3.7128504674,2.3680745427  
B,0,-0.0909041651,-3.9858976105,2.7119132267  
F,0,0.6461639126,-2.8826310406,2.3107331415  
F,0,0.0209678461,-4.1652921815,4.0704462019  
F,0,0.3461964072,-5.1068185201,2.0468857419

### Pi Complex NO2BF4 PCM ONIOM 3.406\_94020

ONIOM(M062X/6-311G\*:PM3)  
E(RPM3) = 0.274295003518

Zero-point correction= 0.158065 (Hartree/Particle)  
Thermal correction to Energy= 0.174880  
Thermal correction to Enthalpy= 0.175825  
Thermal correction to Gibbs Free Energy= 0.110851  
Sum of electronic and ZPE= -476.892992  
Sum of electronic and thermal Energies= -476.876178  
Sum of electronic and thermal Enthalpies= -476.875233  
Sum of electronic and thermal Free Energies= -476.940207

| E             | CV        | S         |
|---------------|-----------|-----------|
| KCal/Mol      | Cal/Mol-K | Cal/Mol-K |
| Total 109.739 | 55.685    | 136.748   |

C,0,-0.0639081568,-0.3717528674,4.1883481227  
C,0,-0.3037664744,1.0006098362,4.184852028  
C,0,-1.6065449489,1.4896780422,4.1048562205  
C,0,-2.6962164036,0.62171102659,4.0271675409  
C,0,-2.4416068401,-0.757923892,4.0220238385  
C,0,-1.1379186626,-1.2528723946,4.1092167154  
C,0,-4.110026867,1.1372262221,3.9811334958  
H,0,0.9482545207,-0.7566338113,4.2361953096  
H,0,0.5266595824,1.694407915,4.241326558  
H,0,-1.7772020693,2.5608249502,4.1025870503  
H,0,-3.275488458,-1.451430848,3.9642806314  
H,0,-0.9589590942,-2.3252232923,4.0865454615  
H,0,-4.1501081792,2.160159743,3.6070669374  
H,0,-4.5444894632,1.1316732306,4.9838960841  
H,0,-4.7416487192,0.5103692773,3.3491901329  
N,0,-1.8805018184,-0.5465102219,1.3116422001  
O,0,-2.6961593657,-1.2675079796,1.0835741979  
O,0,-1.0549591356,0.1898239824,1.3825598799  
F,0,-0.4486284372,-4.4773773182,2.6476138121  
B,0,0.4605657683,-3.6421499276,2.0359569371  
F,0,-0.2158234828,-2.5692045068,1.4732271243  
F,0,1.3702195088,-3.1783061667,2.9601531691  
F,0,1.1221608959,-4.3235910385,1.0380945522

### Pi Complex NO2BF4 PCM ONIOM 3.408\_94164

ONIOM(M062X/6-311G\*:PM3)  
E(RPM3) = 0.274141138819

Zero-point correction= 0.158015 (Hartree/Particle)  
Thermal correction to Energy= 0.174876  
Thermal correction to Enthalpy= 0.175820  
Thermal correction to Gibbs Free Energy= 0.109504  
Sum of electronic and ZPE= -476.893138  
Sum of electronic and thermal Energies= -476.876278  
Sum of electronic and thermal Enthalpies= -476.875334  
Sum of electronic and thermal Free Energies= -476.941649

| E             | CV        | S         |
|---------------|-----------|-----------|
| KCal/Mol      | Cal/Mol-K | Cal/Mol-K |
| Total 109.736 | 55.710    | 139.573   |

C,0,-3.6336609423,-0.5981605817,0.5382173212  
C,0,-2.9948052888,0.2803794646,1.4144871802  
C,0,-2.0051518573,1.1426989958,0.9528353776  
C,0,-1.6257692182,1.1474469828,-0.3929508567  
C,0,-2.267218245,0.2542169655,-1.2603047855  
C,0,-3.2695297758,-0.6084304646,-0.8022628686  
C,0,-0.5554907934,2.0847710775,-0.885340145  
H,0,-4.4079169507,-1.2632388852,0.9006527977  
H,0,-3.2714849601,0.2947833477,2.4623637999  
H,0,-1.5188680623,1.8231693097,1.6443756958  
H,0,-1.9967461849,0.2482169451,-2.3121694495  
H,0,-3.7631656604,-1.2754601803,-1.4995291138  
H,0,-0.7989066481,3.1167644437,-0.6261353718  
H,0,-0.4394750467,2.0234160213,-1.9673795207  
H,0,0.4131700808,1.8567766628,-0.4252237879  
N,0,-0.5306611919,-1.7136202805,-0.3244116655  
O,0,-0.8185220633,-1.6613021067,0.7444676556  
O,0,-0.1591332508,-1.8738084493,-1.3598672007  
F,0,2.9391015672,1.1082499409,-0.9111009083  
B,0,2.7148643009,0.5163340587,0.3124469876  
F,0,3.8358738271,-0.1842404683,0.701257536  
F,0,2.4213203192,1.4763828027,1.2556981268  
F,0,1.6502690448,-0.3663676022,0.2068671956

**TSs for Toluene + NO<sub>2</sub><sup>+</sup>BF<sub>4</sub><sup>-</sup> M062X/6-311G\*/PCM(CH<sub>2</sub>Cl<sub>2</sub>)**

**TS NO2BF4 PCM PURE-M06-2X  
3.440\_824095 (5a<sup>‡</sup>)**

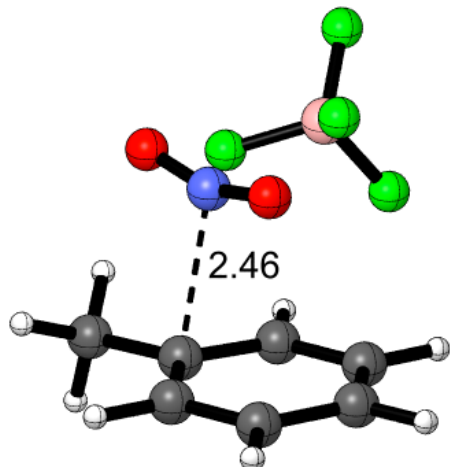

M062X/6-311G\*  
E(RM062X) = -900.938230756

Zero-point correction= 0.157181 (Hartree/Particle)  
Thermal correction to Energy= 0.172152  
Thermal correction to Enthalpy= 0.173096  
Thermal correction to Gibbs Free Energy= 0.114136  
Sum of electronic and ZPE= -900.781049  
Sum of electronic and thermal Energies= -900.766079  
Sum of electronic and thermal Enthalpies= -900.765135  
Sum of electronic and thermal Free Energies= -900.824095

| E             | CV        | S         |
|---------------|-----------|-----------|
| KCal/Mol      | Cal/Mol-K | Cal/Mol-K |
| Total 108.027 | 53.140    | 124.092   |

C,0,-1.0102818907,-0.433536969,1.5651973451  
C,0,-0.7782877839,0.8806702567,1.1365812781  
C,0,-1.6818068026,1.5052314582,0.2977331748  
C,0,-2.8341488766,0.8203091025,-0.1421470076  
C,0,-3.0710923804,-0.4890607882,0.3323471484  
C,0,-2.1618388761,-1.1104113392,1.1745525989  
C,0,-3.8539580601,1.488495173,-1.0129993114  
H,0,-0.2872403082,-0.92140422,2.2085329235  
H,0,0.1153129439,1.4025694958,1.4574440826  
H,0,-1.5064471399,2.5210167525,-0.0405292082  
H,0,-3.964883125,-1.0118360067,0.0161749292  
H,0,-2.3448882918,-2.1267291697,1.5008345004  
H,0,-4.6366898694,1.9247485951,-0.3857815624  
H,0,-4.3325036448,0.7620326743,-1.6723652637  
H,0,-3.4170700658,2.292561324,-1.6068667788  
N,0,-1.4944211238,-0.3484565674,-1.8393753424  
O,0,-2.1472515278,-0.0697142997,-2.7167547178  
O,0,-0.5794208854,-0.7519383026,-1.3213861869  
F,0,-2.3512906532,-2.5956563131,-1.796043987  
B,0,-3.7574582321,-2.7949257163,-1.8912966265  
F,0,-4.0290752092,-3.748807415,-2.8598446355  
F,0,-4.2387787784,-3.1938519143,-0.6408984897

F,0,-4.3371304187,-1.557330811,-2.2454068632

**TS NO2BF4 PCM PURE-M06-2X  
3.4399\_824088**

M062X/6-311G\*  
E(RM062X) = -900.938230779

Zero-point correction= 0.157184 (Hartree/Particle)  
Thermal correction to Energy= 0.172153  
Thermal correction to Enthalpy= 0.173097  
Thermal correction to Gibbs Free Energy= 0.114142  
Sum of electronic and ZPE= -900.781047  
Sum of electronic and thermal Energies= -900.766078  
Sum of electronic and thermal Enthalpies= -900.765133  
Sum of electronic and thermal Free Energies= -900.824088

| E             | CV        | S         |
|---------------|-----------|-----------|
| KCal/Mol      | Cal/Mol-K | Cal/Mol-K |
| Total 108.028 | 53.139    | 124.081   |

C,0,1.6436415556,2.4802636962,0.1935466235  
C,0,2.7282275088,1.7903389991,0.7524260453  
C,0,2.9650375674,0.4738760967,0.4046573877  
C,0,2.110240449,-0.1863268976,-0.5030579634  
C,0,1.0462904869,0.5372725688,-1.0862654784  
C,0,0.8139498259,1.858040236,-0.7345132671  
C,0,2.3703064536,-1.597518424,-0.9340756463  
H,0,1.455283704,3.506796534,0.4858400471  
H,0,3.3752681769,2.2888346295,1.4642512718  
H,0,3.8006407476,-0.0669250365,0.8362749187  
H,0,0.4000948922,0.0428305864,-1.8004635673  
H,0,-0.0268533076,2.3856281719,-1.1675987187  
H,0,1.4328019345,-2.1125798751,-1.1516054772  
H,0,2.9307207363,-2.1552853398,-0.182476137  
H,0,2.9608816989,-1.5926658398,-1.8547180814  
N,0,0.4825632177,-0.5628494073,1.2999878352  
O,0,0.3958489308,-1.6778924841,1.1489206061  
O,0,0.338127619,0.4209291673,1.8287933271  
F,0,-0.9353662985,-1.7977018116,-1.184405516  
B,0,-1.9334756999,-0.8201090709,-0.9816106465  
F,0,-1.6415838612,-0.1606178413,0.2455751511  
F,0,-1.8836854942,0.1180311927,-2.0168461652  
F,0,-3.1829008438,-1.4158478509,-0.9055715491

**TS NO2BF4 PCM PURE-M06-2X  
3.440\_824085**

M062X/6-311G\*  
E(RM062X) = -900.938230783

Zero-point correction= 0.157185 (Hartree/Particle)  
Thermal correction to Energy= 0.172154  
Thermal correction to Enthalpy= 0.173098  
Thermal correction to Gibbs Free Energy= 0.114145  
Sum of electronic and ZPE= -900.781046  
Sum of electronic and thermal Energies= -900.766077  
Sum of electronic and thermal Enthalpies= -900.765133  
Sum of electronic and thermal Free Energies= -900.824085

E CV S  
KCal/Mol Cal/Mol-K Cal/Mol-K  
Total 108.028 53.138 124.076

C,0,-0.886597005,-0.043161829,1.8571414905  
C,0,-2.0661945678,0.6723635012,1.6743680607  
C,0,-2.9816788786,0.254823141,0.7205945751  
C,0,-2.7232839065,-0.8833805633,-0.0752940723  
C,0,-1.5413154489,-1.6191159952,0.1530230016  
C,0,-0.6317341918,-1.1978169148,1.1044802585  
C,0,-3.7488055818,-1.342457657,-1.0664661522  
H,0,-0.1591634294,0.2894978848,2.5884837855  
H,0,-2.2671288229,1.5664788112,2.2514757435  
H,0,-3.8975348793,0.8109551735,0.5655383636  
H,0,-1.3484450811,-2.5099370653,-0.4353904184  
H,0,0.2840287906,-1.754315771,1.2642985691  
H,0,-4.2644392056,-0.4888149647,-1.5102528017  
H,0,-4.5020931214,-1.9483949402,-0.5548194153  
H,0,-3.3074530635,-1.9554938287,-1.8535253822  
N,0,-1.4629604534,0.720258505,-1.4470491092  
O,0,-2.1324296737,0.6514571719,-2.3530016349  
O,0,-0.5448487153,1.0091167131,-0.8622748771  
F,0,-4.24711686,3.0781891108,0.4898908148  
B,0,-3.7905836801,3.0246898613,-0.8303473068  
F,0,-4.1143386269,4.1832464573,-1.5193174679  
F,0,-2.3775193478,2.8539210349,-0.8173633395  
F,0,-4.3469492497,1.8987521634,-1.4751466854

**TS NO2BF4 PCM PURE-M06-2X**  
**3.426\_824053 (5b<sup>‡</sup>)**

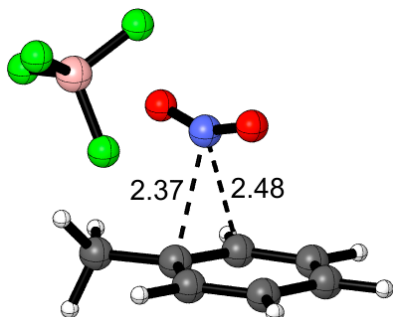

M062X/6-311G\*  
E(RM062X) = -900.937046606

Zero-point correction= 0.156855 (Hartree/Particle)  
Thermal correction to Energy= 0.171835  
Thermal correction to Enthalpy= 0.172779  
Thermal correction to Gibbs Free Energy= 0.112994  
Sum of electronic and ZPE= -900.780191  
Sum of electronic and thermal Energies= -900.765212  
Sum of electronic and thermal Enthalpies= -900.764268  
Sum of electronic and thermal Free Energies= -900.824053

E CV S  
KCal/Mol Cal/Mol-K Cal/Mol-K  
Total 107.828 53.127 125.828

C,0,-1.9062710451,-0.7144224971,1.1120366187  
C,0,-1.4232682291,0.5169540071,1.52227902

C,0,-1.8554215488,1.6676117661,0.8685863008  
C,0,-2.798263357,1.5985031769,-0.1906301725  
C,0,-3.317117116,0.3361666821,-0.5466853148  
C,0,-2.8624852669,-0.8008384879,0.0817617901  
C,0,-3.3068079677,2.8420646507,-0.8521038305  
H,0,-1.5533116659,-1.6211596146,1.5891379605  
H,0,-0.6982577476,0.5878573657,2.3232499033  
H,0,-1.4789733169,2.6402157078,1.1699074626  
H,0,-4.0413927923,0.2744634209,-1.3492436796  
H,0,-3.2367479526,-1.77233015,-0.2176784293  
H,0,-4.3447250949,3.0146198741,-0.5556321238  
H,0,-3.2827787038,2.7305108338,-1.9381742914  
H,0,-2.7260589476,3.7191998347,-0.5660376328  
N,0,-0.7227522512,1.3877473445,-1.3202750352  
O,0,-0.4130523872,0.2990091677,-1.2985397925  
O,0,-0.5988316137,2.457359757,-1.6826715848  
F,0,-2.3724434449,0.931995471,-3.1737352246  
B,0,-1.5607825096,1.4226308112,-4.2383060676  
F,0,-1.9485753162,0.8423676245,-5.4343836271  
F,0,-1.6919252436,2.8122899356,-4.2786498517  
F,0,-0.2290434814,1.0833933185,-3.9229043976

**TS NO2BF4 PCM PURE-M06-2X**  
**3.393\_822143utf00006**

M062X/6-311G\*  
E(RM062X) = -900.935093295

Zero-point correction= 0.156998 (Hartree/Particle)  
Thermal correction to Energy= 0.172023  
Thermal correction to Enthalpy= 0.172967  
Thermal correction to Gibbs Free Energy= 0.112950  
Sum of electronic and ZPE= -900.778096  
Sum of electronic and thermal Energies= -900.763070  
Sum of electronic and thermal Enthalpies= -900.762126  
Sum of electronic and thermal Free Energies= -900.822143

E CV S  
KCal/Mol Cal/Mol-K Cal/Mol-K  
Total 107.946 53.120 126.317

C,0,2.8575343716,-1.7485595972,0.7241916858  
C,0,3.3218246122,-1.4760057777,-0.5447468765  
C,0,3.2791891546,-0.1608185115,-1.0179554817  
C,0,2.8388846154,0.904336765,-0.1877248236  
C,0,2.3963782401,0.6014844355,1.1129351149  
C,0,2.3897215431,-0.7047494886,1.5519409344  
C,0,2.924309588,2.318423966,-0.6684298844  
H,0,2.8432657198,-2.7668533343,1.0931284991  
H,0,3.6585592541,-2.2675310726,-1.2003055877  
H,0,3.6186307716,0.0603026368,-2.0237488332  
H,0,2.0521632158,1.4017793158,1.7577645676  
H,0,2.0253796567,-0.9379581822,2.545300314  
H,0,2.8539392305,2.3814190427,-1.755452451  
H,0,3.8995668021,2.7279821365,-0.3885490993  
H,0,2.1561006551,2.946140537,-0.2167430951  
N,0,0.9597482053,0.0425795253,-1.4443803582  
O,0,0.4842564297,-0.7823151688,-0.8284193645  
O,0,0.8894143082,0.8334285422,-2.2605548549  
F,0,0.9136057951,-1.6903983293,-5.1846056559  
B,0,0.748706945,-2.0006141771,-3.8398436712

F,0,0.588355936,-3.3693316097,-3.6558914209  
 F,0,1.8924113816,-1.5601281408,-3.1103304159  
 F,0,-0.3632544316,-1.3074895128,-3.3151692419

### TS NO2BF4 PCM PURE-M06-2X 3.3794\_822005

M062X/6-311G\*  
 E(RM062X) = -900.935104619

Zero-point correction= 0.156812 (Hartree/Particle)  
 Thermal correction to Energy= 0.171848  
 Thermal correction to Enthalpy= 0.172792  
 Thermal correction to Gibbs Free Energy= 0.113099  
 Sum of electronic and ZPE= -900.778293  
 Sum of electronic and thermal Energies= -900.763257  
 Sum of electronic and thermal Enthalpies= -900.762312  
 Sum of electronic and thermal Free Energies= -900.822005

| E             | CV        | S         |
|---------------|-----------|-----------|
| KCal/Mol      | Cal/Mol-K | Cal/Mol-K |
| Total 107.836 | 53.122    | 125.634   |

C,0,-2.3422577904,-2.1331702237,-0.1259724234  
 C,0,-1.85809662,-1.3353608632,0.888277449  
 C,0,-2.1088896475,0.0400310022,0.851378149  
 C,0,-2.9172063585,0.6126353896,-0.1669693145  
 C,0,-3.4227312073,-0.2296256623,-1.1733217192  
 C,0,-3.1235111395,-1.5748063816,-1.1606880185  
 C,0,-3.2784628107,2.0630660985,-0.1144563867  
 H,0,-2.121672389,-3.1937510893,-0.1388779352  
 H,0,-1.2357084737,-1.7420662726,1.6737577399  
 H,0,-1.7118147907,0.6806951533,1.631075373  
 H,0,-4.0375609866,0.1908728298,-1.9607298583  
 H,0,-3.4938133356,-2.2170531483,-1.9509822224  
 H,0,-4.2045976947,2.1752248897,0.4574726187  
 H,0,-3.4482216398,2.4740130645,-1.1097301083  
 H,0,-2.5162362047,2.6519480737,0.3982266704  
 N,0,-0.5976887707,0.6715984436,-0.8403477347  
 O,0,-0.3784371872,-0.287918325,-1.4043402596  
 O,0,-0.3491699985,1.758825415,-0.6080311467  
 F,0,2.0351003561,0.5521943624,-0.6490158623  
 B,0,2.0994676049,0.1950184418,0.7154208292  
 F,0,2.8369120484,-0.9729072702,0.8697855832  
 F,0,2.6484122608,1.2379014613,1.45332161  
 F,0,0.7599647747,-0.0322723892,1.1487359673

### TS NO2BF4 PCM PURE-M06-2X 3.332\_821966

M062X/6-311G\*  
 E(RM062X) = -900.937163256

Zero-point correction= 0.157453 (Hartree/Particle)  
 Thermal correction to Energy= 0.171946  
 Thermal correction to Enthalpy= 0.172890  
 Thermal correction to Gibbs Free Energy= 0.115197  
 Sum of electronic and ZPE= -900.779710  
 Sum of electronic and thermal Energies= -900.765217  
 Sum of electronic and thermal Enthalpies= -900.764273

Sum of electronic and thermal Free Energies= -900.821966

| E             | CV        | S         |
|---------------|-----------|-----------|
| KCal/Mol      | Cal/Mol-K | Cal/Mol-K |
| Total 107.898 | 52.379    | 121.425   |

C,0,-1.4950406867,-0.727259127,1.1248757157  
 C,0,-0.9671302018,0.572752383,1.2172511866  
 C,0,-1.6081955331,1.6039176077,0.5822989224  
 C,0,-2.7853721567,1.3541190998,-0.2040636468  
 C,0,-3.3504873719,0.0359741035,-0.1846857477  
 C,0,-2.6928247006,-0.9892434794,0.4511634979  
 C,0,-3.5941568161,2.5060104787,-0.7089073374  
 H,0,-0.968658486,-1.5442018371,1.6058266547  
 H,0,-0.0603532241,0.7493855787,1.781031956  
 H,0,-1.2256091862,2.6174646978,0.6324533296  
 H,0,-4.2839448157,-0.1387012772,-0.7038065206  
 H,0,-3.0955572352,-1.9934791686,0.425148213  
 H,0,-3.4530840773,3.3778242165,-0.0698479093  
 H,0,-4.6489843513,2.2442033471,-0.7550642797  
 H,0,-3.2953609895,2.7796189468,-1.7250269671  
 N,0,-1.5366741338,0.7915860311,-1.8403917451  
 O,0,-1.7922201354,1.5338145416,-2.6901490183  
 O,0,-0.8198723911,-0.0861743042,-1.614779772  
 F,0,-2.928099566,-1.0263220374,-2.9557254888  
 B,0,-4.2775585221,-0.6714927457,-3.1809131284  
 F,0,-4.6196233506,-0.8937230798,-4.5071914482  
 F,0,-5.092056258,-1.4274111151,-2.3230674715  
 F,0,-4.4249788109,0.6955911751,-2.8580999948

### TS NO2BF4 PCM PURE-M06-2X 2.434\_821714

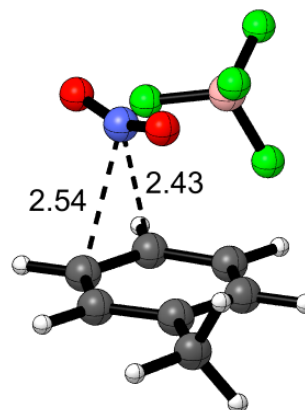

M062X/6-311G\*  
 E(RM062X) = -900.935240397

Zero-point correction= 0.156994 (Hartree/Particle)  
 Thermal correction to Energy= 0.172169  
 Thermal correction to Enthalpy= 0.173113  
 Thermal correction to Gibbs Free Energy= 0.113527  
 Sum of electronic and ZPE= -900.778246  
 Sum of electronic and thermal Energies= -900.763071  
 Sum of electronic and thermal Enthalpies= -900.762127  
 Sum of electronic and thermal Free Energies= -900.821714

| E | CV | S |
|---|----|---|
|---|----|---|

KCal/Mol Cal/Mol-K Cal/Mol-K  
Total 108.038 53.282 125.411

C,0,-1.8408225491,-0.9887977627,-1.3499579918  
C,0,-3.0567204418,-0.6751782168,-0.7096182153  
C,0,-3.2081443809,0.5356870502,-0.0378295163  
C,0,-2.152792657,1.4399326882,0.0191445533  
C,0,-0.9493675976,1.1275601981,-0.6534280104  
C,0,-0.7970677526,-0.0540800742,-1.3470986958  
C,0,-2.2648920073,2.7285068827,0.7795339174  
H,0,-1.7236515385,-1.9277804049,-1.8781925737  
H,0,-3.8771246502,-1.3840148148,-0.7444895564  
H,0,-4.1449464914,0.7647631418,0.4574654164  
H,0,-0.1321712115,1.8408556728,-0.6161112637  
H,0,0.1291968336,-0.2986238572,-1.8492746053  
H,0,-1.9719893802,3.5731511913,0.1523016122  
H,0,-1.5930478527,2.7189293163,1.6420596407  
H,0,-3.2799337084,2.8961788443,1.1378896804  
N,0,-1.5033646493,-1.9118188212,0.8773709664  
O,0,-1.0194529417,-1.0559878985,1.4292821061  
O,0,-1.883371738,-2.966370601,0.7470355636  
F,0,0.5913352275,-2.4809993953,-0.1505599389  
B,0,0.5916921653,-3.2745218553,-1.3350244455  
F,0,-0.6602844372,-3.9088289109,-1.4266415561  
F,0,0.7621312013,-2.4290291113,-2.4370186522  
F,0,1.6111775577,-4.2113582596,-1.2634144351

### TS NO2BF4 PCM PURE-M06-2X 2.429\_821508

M062X/6-311G\*  
E(RM062X) = -900.935305625

Zero-point correction= 0.157249 (Hartree/Particle)  
Thermal correction to Energy= 0.172359  
Thermal correction to Enthalpy= 0.173303  
Thermal correction to Gibbs Free Energy= 0.113798  
Sum of electronic and ZPE= -900.778057  
Sum of electronic and thermal Energies= -900.762947  
Sum of electronic and thermal Enthalpies= -900.762003  
Sum of electronic and thermal Free Energies= -900.821508

E CV S  
KCal/Mol Cal/Mol-K Cal/Mol-K  
Total 108.157 53.083 125.238

C,0,-0.8873318714,0.2541988098,1.4844612488  
C,0,-2.1530203705,0.8564791654,1.365946353  
C,0,-3.1303394847,0.2617036118,0.5836453864  
C,0,-2.8743127181,-0.9468594736,-0.0738040271  
C,0,-1.6246308826,-1.56893604,0.1013743991  
C,0,-0.6428739491,-0.9901715261,0.880035979  
C,0,-3.9066624156,-1.583250754,-0.9572950203  
H,0,-0.1136717436,0.7110006717,2.088710938  
H,0,-2.3522665534,1.7935483055,1.8736984626  
H,0,-4.0983339284,0.7369757723,0.4708170955  
H,0,-1.4318380602,-2.5135298397,-0.3964210153  
H,0,0.3232189603,-1.4640983507,0.9976789371  
H,0,-3.5704577513,-1.5747936865,-1.9976570743  
H,0,-4.8616969003,-1.0620820213,-0.9014544158  
H,0,-4.0610634357,-2.6276443174,-0.6778283815

N,0,-0.3203710188,1.4620740833,-0.5448390208  
O,0,-0.9246565988,0.9620998225,-1.3506008588  
O,0,0.3826384836,2.2150595526,-0.0887592391  
F,0,2.0522095282,0.433221183,1.0967544864  
B,0,2.4528895355,-0.2825675004,-0.0484706186  
F,0,3.7052147943,0.1402358728,-0.4687324671  
F,0,2.4509760441,-1.6513067589,0.2279047263  
F,0,1.4938413368,-0.0199225823,-1.0700888734

### TS NO2BF4 PCM PURE-M06-2X 2.4410\_821447

M062X/6-311G\*  
E(RM062X) = -900.935135332

Zero-point correction= 0.157115 (Hartree/Particle)  
Thermal correction to Energy= 0.172245  
Thermal correction to Enthalpy= 0.173190  
Thermal correction to Gibbs Free Energy= 0.113688  
Sum of electronic and ZPE= -900.778020  
Sum of electronic and thermal Energies= -900.762890  
Sum of electronic and thermal Enthalpies= -900.761946  
Sum of electronic and thermal Free Energies= -900.821447

E CV S  
KCal/Mol Cal/Mol-K Cal/Mol-K  
Total 108.086 53.174 125.231

C,0,-1.7762903842,-0.9983838729,-1.3188325103  
C,0,-2.9843544479,-0.7333762897,-0.6604744483  
C,0,-3.137258466,0.4627602415,0.00895485  
C,0,-2.1189005656,1.4445969125,0.0050206814  
C,0,-0.9459894557,1.1970632204,-0.6972636303  
C,0,-0.7629131335,-0.018775074,-1.3500185638  
C,0,-2.3172715464,2.7185586937,0.772199702  
H,0,-1.6364277729,-1.933209418,-1.8500746449  
H,0,-3.7753191734,-1.4733293986,-0.6563174208  
H,0,-4.0560593785,0.6657181391,0.5498785937  
H,0,-0.1437396469,1.9242913123,-0.7096618127  
H,0,0.1664966491,-0.217905124,-1.8695800682  
H,0,-1.5726544537,3.4665100615,0.5028267823  
H,0,-2.2334941323,2.5273185467,1.8458123514  
H,0,-3.3122201995,3.1307904893,0.5932077418  
N,0,-0.4128900122,-1.5244689998,0.6363324694  
O,0,-0.8711369301,-0.8967509837,1.4531185155  
O,0,0.2201466732,-2.3605623113,0.2165849809  
F,0,1.5051509282,-0.0378859489,0.7193339903  
B,0,2.3889852687,0.0387357624,-0.3945759835  
F,0,2.1804452874,-1.1068443857,-1.1835599416  
F,0,2.0699890293,1.1798857906,-1.1415751985  
F,0,3.6998758631,0.0929296367,0.0548295641

### TS NO2BF4 PCM PURE-M06-2X 2.419\_821322utf00003

M062X/6-311G\*  
E(RM062X) = -900.935062628

Zero-point correction= 0.157106 (Hartree/Particle)  
Thermal correction to Energy= 0.172184

Thermal correction to Enthalpy= 0.173129  
 Thermal correction to Gibbs Free Energy= 0.113741  
 Sum of electronic and ZPE= -900.777956  
 Sum of electronic and thermal Energies= -900.762878  
 Sum of electronic and thermal Enthalpies= -900.761934  
 Sum of electronic and thermal Free Energies= -900.821322

E CV S  
 KCal/Mol Cal/Mol-K Cal/Mol-K  
 Total 108.047 53.192 124.992

C,0,-3.2703514393,-1.043692062,-0.6890301725  
 C,0,-3.7744870497,-0.0953723686,0.2170112521  
 C,0,-3.0294739291,1.0329354822,0.50438874  
 C,0,-1.7961856488,1.2597091742,-0.1315669504  
 C,0,-1.3485554388,0.3549041005,-1.1025628414  
 C,0,-2.0698285975,-0.7886997483,-1.3831414592  
 C,0,-0.9377160985,2.4342214352,0.2282116027  
 H,0,-3.8462216353,-1.9335468756,-0.9163860085  
 H,0,-4.7238368527,-0.2694888268,0.7092163049  
 H,0,-3.3883652711,1.7469785659,1.2374283651  
 H,0,-0.3987128096,0.520685945,-1.5932793261  
 H,0,-1.6880959314,-1.5070122317,-2.097857078  
 H,0,0.0174675708,2.0762430912,0.6217991818  
 H,0,-1.4086401218,3.0725831335,0.9746209194  
 H,0,-0.7151774509,3.0339754055,-0.6572048653  
 N,0,-1.8565960702,-2.0343158678,1.0052375321  
 O,0,-1.3001461621,-1.1743510303,1.4676271687  
 O,0,-2.1991260017,-3.1067197303,0.8968146061  
 F,0,0.9638204634,-1.3430042337,-1.9571330906  
 B,0,1.1313498872,-1.7400263707,-0.6249948872  
 F,0,2.3499781708,-2.3856165868,-0.4558202221  
 F,0,1.0450175464,-0.6252891133,0.2242659698  
 F,0,0.0752068698,-2.6359922872,-0.2854377414

### TS NO2BF4 PCM PURE-M06-2X 2.4198\_821288

M062X/6-311G\*  
 E(RM062X) = -900.935162090

Zero-point correction= 0.157359 (Hartree/Particle)  
 Thermal correction to Energy= 0.172449  
 Thermal correction to Enthalpy= 0.173393  
 Thermal correction to Gibbs Free Energy= 0.113874  
 Sum of electronic and ZPE= -900.777803  
 Sum of electronic and thermal Energies= -900.762713  
 Sum of electronic and thermal Enthalpies= -900.761769  
 Sum of electronic and thermal Free Energies= -900.821288

E CV S  
 KCal/Mol Cal/Mol-K Cal/Mol-K  
 Total 108.213 53.101 125.269

C,0,1.958519396,-1.1145535613,1.2372194673  
 C,0,2.9921891799,-0.6647537294,0.4016029895  
 C,0,2.8946141314,0.5825503364,-0.1856624473  
 C,0,1.7987172951,1.4230672573,0.0833960692  
 C,0,0.824386326,1.0058223841,0.9963938127  
 C,0,0.8898892691,-0.2524525927,1.5639623904  
 C,0,1.6395379029,2.7402345363,-0.6124038477

H,0,2.0201555375,-2.0946302162,1.6966360233  
 H,0,3.8386604885,-1.30801219,0.1929755168  
 H,0,3.6638694311,0.9194970828,-0.8721185679  
 H,0,-0.0235497833,1.6442606884,1.2068744202  
 H,0,0.1054252939,-0.5896311565,2.2312269769  
 H,0,1.4928520284,3.544545296,0.1117369549  
 H,0,0.7446248618,2.7055204344,-1.2394704405  
 H,0,2.4998131209,2.9803944518,-1.236033176  
 N,0,0.5253886261,-1.7255958592,-0.6143746453  
 O,0,0.6004230604,-0.8647132023,-1.3328494699  
 O,0,0.229541878,-2.7601741867,-0.2657868239  
 F,0,-2.1823492115,0.9269081215,1.1523506517  
 B,0,-2.1730384262,0.3227602284,-0.1097543069  
 F,0,-1.3141148409,1.0231871414,-0.9738314387  
 F,0,-1.6725968696,-1.0047150415,0.0293992539  
 F,0,-3.4563056955,0.2743207769,-0.6401113627

### TS NO2BF4 PCM PURE-M06-2X 2.435\_821006

M062X/6-311G\*  
 E(RM062X) = -900.935138423

Zero-point correction= 0.157267 (Hartree/Particle)  
 Thermal correction to Energy= 0.172246  
 Thermal correction to Enthalpy= 0.173191  
 Thermal correction to Gibbs Free Energy= 0.114132  
 Sum of electronic and ZPE= -900.777872  
 Sum of electronic and thermal Energies= -900.762892  
 Sum of electronic and thermal Enthalpies= -900.761948  
 Sum of electronic and thermal Free Energies= -900.821006

E CV S  
 KCal/Mol Cal/Mol-K Cal/Mol-K  
 Total 108.086 53.055 124.299

C,0,-2.7315304569,-1.0596366729,-0.8525009019  
 C,0,-3.458684925,-0.3572834215,0.1162700198  
 C,0,-3.016662594,0.8866925373,0.5197973687  
 C,0,-1.8754072091,1.4854905471,-0.0605531748  
 C,0,-1.212115834,0.8204648143,-1.0868576522  
 C,0,-1.6196849842,-0.449126754,-1.4725050947  
 C,0,-1.3645565641,2.7934783096,0.4598825832  
 H,0,-3.0542441951,-2.0437336525,-1.1735439675  
 H,0,-4.3359196318,-0.8047193023,0.5672673939  
 H,0,-3.5457698826,1.4182167488,1.3041652072  
 H,0,-0.332214603,1.2624223012,-1.5373011525  
 H,0,-1.0714897918,-0.9844238398,-2.2391170118  
 H,0,-0.7973120468,2.6153313112,1.37731235  
 H,0,-2.1824266924,3.4780109491,0.690906031  
 H,0,-0.6881246206,3.2641241999,-0.2528650322  
 N,0,-0.8679100538,-1.7183252024,0.5697389992  
 O,0,-0.804362628,-0.8864405169,1.3251418752  
 O,0,-0.6467529113,-2.7508054224,0.1582715094  
 F,0,1.9225738371,1.04422706,-1.2954986763  
 B,0,1.8389976723,0.2686769285,-0.1355620336  
 F,0,3.1053135788,-0.005367248,0.3672307874  
 F,0,1.0648088569,0.9356669404,0.8290947868  
 F,0,1.1880076794,-0.9607566147,-0.4516142143

**TS NO2BF4 PCM PURE-M06-2X****2.424\_820983**

M062X/6-311G\*

E(RM062X) = -900.933886364

Zero-point correction= 0.157049 (Hartree/Particle)  
 Thermal correction to Energy= 0.172252  
 Thermal correction to Enthalpy= 0.173196  
 Thermal correction to Gibbs Free Energy= 0.112903  
 Sum of electronic and ZPE= -900.776837  
 Sum of electronic and thermal Energies= -900.761635  
 Sum of electronic and thermal Enthalpies= -900.760690  
 Sum of electronic and thermal Free Energies= -900.820983

| E        | CV        | S              |
|----------|-----------|----------------|
| KCal/Mol | Cal/Mol-K | Cal/Mol-K      |
| Total    | 108.090   | 53.155 126.897 |

C,0,-0.9802296939,0.283338448,1.464761148  
 C,0,-2.2960323043,0.7185035574,1.2200391317  
 C,0,-3.1550753693,-0.0696781611,0.4715792865  
 C,0,-2.7306701865,-1.3074341556,-0.0255699919  
 C,0,-1.4341839381,-1.7604565433,0.2807218202  
 C,0,-0.5691757213,-0.9866099429,1.0270880331  
 C,0,-3.6313016069,-2.144954244,-0.8845116379  
 H,0,-0.295921351,0.8902559124,2.0442825747  
 H,0,-2.625182796,1.67795811,1.603002526  
 H,0,-4.1613537639,0.2740173228,0.2592304292  
 H,0,-1.1129605238,-2.728525157,-0.0892021388  
 H,0,0.4352336558,-1.3226643962,1.2465676715  
 H,0,-3.2920906247,-2.1134875857,-1.9239516183  
 H,0,-4.6610620194,-1.7904802912,-0.8534619006  
 H,0,-3.6086380745,-3.1896906027,-0.5694427316  
 N,0,-0.4260726418,1.3001655673,-0.6651370444  
 O,0,0.1723767563,2.1715534037,-0.2737807017  
 O,0,-0.9300651005,0.6505688427,-1.4324375966  
 F,0,1.9678413544,0.6538921797,1.2726276169  
 B,0,2.551506657,0.4819647048,0.0020953954  
 F,0,3.617367127,-0.4007625802,0.0713442553  
 F,0,1.5455853972,-0.0498487123,-0.8600311503  
 F,0,2.944163768,1.7222123232,-0.5005053766

**TS NO2BF4 PCM PURE-M06-2X****2.398\_820850**

M062X/6-311G\*

E(RM062X) = -900.934626828

Zero-point correction= 0.157042 (Hartree/Particle)  
 Thermal correction to Energy= 0.172053  
 Thermal correction to Enthalpy= 0.172997  
 Thermal correction to Gibbs Free Energy= 0.113776  
 Sum of electronic and ZPE= -900.777585  
 Sum of electronic and thermal Energies= -900.762574  
 Sum of electronic and thermal Enthalpies= -900.761630  
 Sum of electronic and thermal Free Energies= -900.820850

| E        | CV        | S              |
|----------|-----------|----------------|
| KCal/Mol | Cal/Mol-K | Cal/Mol-K      |
| Total    | 107.965   | 53.086 124.640 |

C,0,2.7322567431,-0.995166805,0.5470515269  
 C,0,3.3246728059,-0.2463328388,-0.4748262467  
 C,0,2.8728232647,1.035411264,-0.7151261625  
 C,0,1.8673502689,1.6307872137,0.0852865023  
 C,0,1.3544681647,0.9175576488,1.1600228443  
 C,0,1.7565040416,-0.3950853933,1.3790516704  
 C,0,1.3229771237,2.9820487878,-0.2611283514  
 H,0,3.0515651958,-2.0124467692,0.7425850269  
 H,0,4.0959848289,-0.6853217957,-1.095102714  
 H,0,3.286309782,1.6048277954,-1.5410656738  
 H,0,0.5787595617,1.3495294955,1.7785759491  
 H,0,1.3108680826,-0.9699337048,2.1818459873  
 H,0,1.0285693412,3.5288502907,0.63508463  
 H,0,0.4237138336,2.851373768,-0.8701578345  
 H,0,2.0407817988,3.577152935,-0.8256419285  
 N,0,0.6166164435,-1.442813505,-0.4906263261  
 O,0,0.3321046087,-2.4669794956,-0.0858249485  
 O,0,0.5029250915,-0.5982940286,-1.2339380916  
 F,0,-3.214225774,0.2506481526,0.8071195832  
 B,0,-1.9607343543,-0.0179918501,0.2809089625  
 F,0,-1.3445086496,1.1599111643,-0.1739740845  
 F,0,-1.1262567317,-0.6043831853,1.2665123673  
 F,0,-2.0486554713,-0.9366111444,-0.7839706881

**TS NO2BF4 PCM PURE-M06-2X****2.3272\_820767**

M062X/6-311G\*

E(RM062X) = -900.933402046

Zero-point correction= 0.156838 (Hartree/Particle)  
 Thermal correction to Energy= 0.171943  
 Thermal correction to Enthalpy= 0.172887  
 Thermal correction to Gibbs Free Energy= 0.112635  
 Sum of electronic and ZPE= -900.776564  
 Sum of electronic and thermal Energies= -900.761459  
 Sum of electronic and thermal Enthalpies= -900.760515  
 Sum of electronic and thermal Free Energies= -900.820767

| E        | CV        | S              |
|----------|-----------|----------------|
| KCal/Mol | Cal/Mol-K | Cal/Mol-K      |
| Total    | 107.896   | 53.099 126.810 |

C,0,-1.9044643822,-0.8008658046,1.0364187237  
 C,0,-1.5095961465,0.446443589,1.5483565094  
 C,0,-1.9486116838,1.5951673177,0.9325818988  
 C,0,-2.8345559557,1.5465989707,-0.1698518198  
 C,0,-3.2872890492,0.3093951323,-0.6229231652  
 C,0,-2.8323890824,-0.8600775711,-0.0278694826  
 C,0,-3.2627299954,2.8223426716,-0.8285344634  
 H,0,-1.565829174,-1.7119757115,1.514449605  
 H,0,-0.8153748302,0.4883867059,2.3763922977  
 H,0,-1.6138416625,2.5631904553,1.2899902025  
 H,0,-3.9841504324,0.2590173476,-1.451340238  
 H,0,-3.171528379,-1.8253559204,-0.3870753218  
 H,0,-3.6056852313,3.5433347803,-0.0837237499  
 H,0,-4.0600982118,2.6543486735,-1.551059017  
 H,0,-2.4154810325,3.2766632441,-1.3498611488  
 N,0,-0.4154645765,-0.944789574,-0.7462610577  
 O,0,-0.2358303599,0.12033448,-1.082011807

O,0,-0.217078547,-2.0607628911,-0.7994152047  
 F,0,1.0593032055,-0.8269012494,1.2541220009  
 B,0,2.3660435935,-0.8703170527,0.6842469008  
 F,0,3.0701450835,0.2665390369,1.0609567935  
 F,0,3.0117757851,-2.026399935,1.1046100726  
 F,0,2.1963250647,-0.8939136949,-0.718086529

### TS NO2BF4 PCM PURE-M06-2X 2.387\_820745

M062X/6-311G\*

E(RM062X) = -900.934045808

Zero-point correction= 0.156934 (Hartree/Particle)  
 Thermal correction to Energy= 0.172037  
 Thermal correction to Enthalpy= 0.172981  
 Thermal correction to Gibbs Free Energy= 0.113301  
 Sum of electronic and ZPE= -900.777112  
 Sum of electronic and thermal Energies= -900.762009  
 Sum of electronic and thermal Enthalpies= -900.761065  
 Sum of electronic and thermal Free Energies= -900.820745

| E        | CV        | S              |
|----------|-----------|----------------|
| KCal/Mol | Cal/Mol-K | Cal/Mol-K      |
| Total    | 107.955   | 53.135 125.608 |

C,0,2.7854997738,-1.6997822256,-0.1352851467  
 C,0,3.6327324203,-0.934404998,-0.9638122363  
 C,0,3.6264970078,0.4510642606,-0.874427149  
 C,0,2.782682526,1.0928751939,0.03236097  
 C,0,1.9737418757,0.313316817,0.8871402397  
 C,0,1.9906327817,-1.0626815197,0.8288734372  
 C,0,2.709256927,2.589082452,0.0991166239  
 H,0,2.7969792092,-2.7814849561,-0.1949708573  
 H,0,4.2773876252,-1.4340333957,-1.6786039409  
 H,0,4.2673684387,1.0374756317,-1.5229974933  
 H,0,1.3214540623,0.8151220052,1.5938619767  
 H,0,1.3473358477,-1.6514945915,1.4675756804  
 H,0,1.7790567223,2.9373177459,-0.3593305154  
 H,0,3.5416002592,3.0560965023,-0.4261817123  
 H,0,2.7066791615,2.9324656129,1.1351594216  
 N,0,1.2873072433,-1.3849390543,-1.9663601126  
 O,0,0.8176882163,-0.3808985556,-1.7633134591  
 O,0,1.4275730824,-2.3546684929,-2.5309779864  
 F,0,-2.1934216837,-3.0920386893,-0.0767720342  
 B,0,-1.139992836,-2.30024487,-0.5000674106  
 F,0,-1.1179519131,-1.0756682849,0.1757401179  
 F,0,0.0970796497,-2.9582562277,-0.2731062855  
 F,0,-1.2205923974,-2.0550223601,-1.8899281277

### TS NO2BF4 PCM PURE-M06-2X 3.444\_820739

M062X/6-311G\*

E(RM062X) = -900.936956537

Zero-point correction= 0.158150 (Hartree/Particle)  
 Thermal correction to Energy= 0.172803  
 Thermal correction to Enthalpy= 0.173747  
 Thermal correction to Gibbs Free Energy= 0.116217

Sum of electronic and ZPE= -900.778806  
 Sum of electronic and thermal Energies= -900.764154  
 Sum of electronic and thermal Enthalpies= -900.763209  
 Sum of electronic and thermal Free Energies= -900.820739

| E        | CV        | S              |
|----------|-----------|----------------|
| KCal/Mol | Cal/Mol-K | Cal/Mol-K      |
| Total    | 108.435   | 52.859 121.082 |

C,0,1.9905369329,-1.1432194098,-1.5561769366  
 C,0,0.9666255978,-0.2206057925,-1.7792644059  
 C,0,0.9014608713,0.9318159186,-1.0134760743  
 C,0,1.8661502208,1.1795673944,-0.0105218727  
 C,0,2.9186631808,0.2590325096,0.1637478471  
 C,0,2.9696732974,-0.8988914623,-0.5896044317  
 C,0,1.8387923501,2.4462947042,0.790749962  
 H,0,2.0244269843,-2.0581069529,-2.1364420785  
 H,0,0.2153056877,-0.4143029946,-2.5353083541  
 H,0,0.1046251245,1.6516859031,-1.1710230325  
 H,0,3.6642358518,0.4382176767,0.9279691695  
 H,0,3.7520090635,-1.6225102611,-0.4024158884  
 H,0,2.2065105446,2.2778323409,1.8050371716  
 H,0,0.837205576,2.8758378134,0.8391058308  
 H,0,2.4947051944,3.1871576015,0.3251168359  
 N,0,0.456004816,-0.253505081,1.3960066797  
 O,0,0.4671085875,-1.2816219202,0.9436720245  
 O,0,0.1554955208,0.5588842435,2.1228819069  
 F,0,2.3099682351,-0.7311536745,2.8439888811  
 B,0,3.144568775,-1.8789674451,2.6668406142  
 F,0,2.5118003532,-2.7357572048,1.7566440802  
 F,0,4.3763107823,-1.4608964641,2.1501766838  
 F,0,3.3144774523,-2.506459443,3.8944983875

### TS NO2BF4 PCM PURE-M06-2X 3.1392\_820578

M062X/6-311G\*

E(RM062X) = -900.934524532

Zero-point correction= 0.157181 (Hartree/Particle)  
 Thermal correction to Energy= 0.172131  
 Thermal correction to Enthalpy= 0.173075  
 Thermal correction to Gibbs Free Energy= 0.113946  
 Sum of electronic and ZPE= -900.777344  
 Sum of electronic and thermal Energies= -900.762393  
 Sum of electronic and thermal Enthalpies= -900.761449  
 Sum of electronic and thermal Free Energies= -900.820578

| E        | CV        | S              |
|----------|-----------|----------------|
| KCal/Mol | Cal/Mol-K | Cal/Mol-K      |
| Total    | 108.014   | 53.050 124.447 |

C,0,-3.3366780558,-0.5973561632,0.3432648468  
 C,0,-2.3068260426,-0.6046035527,1.2700590993  
 C,0,-1.2300609676,0.3054771788,1.1407197579  
 C,0,-1.2261902987,1.2932092012,0.1364216559  
 C,0,-2.2508839072,1.2547562218,-0.7999001496  
 C,0,-3.2855783638,0.3173939401,-0.7064204223  
 C,0,-0.1593576434,2.3462318706,0.0798818428  
 H,0,-4.1562933978,-1.3000911755,0.4228229214  
 H,0,-2.3055203064,-1.3133155634,2.0912539312



H,0,-0.4280340972,0.2978430153,1.8701514213  
 H,0,-2.2550298037,1.9708706678,-1.6150482286  
 H,0,-4.0665752461,0.3155215732,-1.458319046  
 H,0,0.6261815927,2.1550996524,0.8070711108  
 H,0,-0.6005003142,3.3250137148,0.2854147476  
 H,0,0.2982384829,2.381637487,-0.9091515159  
 N,0,-0.3646482818,-1.4829901688,-0.143768429  
 O,0,-0.8367787793,-1.3888505208,-1.1644368329  
 O,0,0.3167583471,-1.9624439405,0.6215347725  
 F,0,1.8580171704,0.1860735087,1.3541306564  
 B,0,2.4211552283,0.242083143,0.0623050622  
 F,0,2.9482045276,1.505918924,-0.1752703885  
 F,0,3.3916345371,-0.7448228896,-0.0727987487  
 F,0,1.3710746195,-0.013565124,-0.8701420646

### TS NO2BF4 PCM PURE-M06-2X 3.1409\_820572

M062X/6-311G\*  
 E(RM062X) = -900.934547624

Zero-point correction= 0.157206 (Hartree/Particle)  
 Thermal correction to Energy= 0.172155  
 Thermal correction to Enthalpy= 0.173099  
 Thermal correction to Gibbs Free Energy= 0.113975  
 Sum of electronic and ZPE= -900.777342  
 Sum of electronic and thermal Energies= -900.762393  
 Sum of electronic and thermal Enthalpies= -900.761449  
 Sum of electronic and thermal Free Energies= -900.820572

| E             | CV        | S         |
|---------------|-----------|-----------|
| KCal/Mol      | Cal/Mol-K | Cal/Mol-K |
| Total 108.029 | 53.041    | 124.436   |

C,0,-3.370588333,-0.6556373104,0.3493715391  
 C,0,-2.3402104542,-0.6523679232,1.2752980435  
 C,0,-1.2760115029,0.2729408624,1.1485858232  
 C,0,-1.2866058276,1.2645103442,0.1481667046  
 C,0,-2.3124206824,1.216496074,-0.7867533527  
 C,0,-3.3335535757,0.2644422927,-0.6965083825  
 C,0,-0.2296417337,2.3271932311,0.0871854573  
 H,0,-4.1805512367,-1.3697218423,0.4268518764  
 H,0,-2.329187756,-1.36375597,2.0940346471  
 H,0,-0.4734330371,0.2738391386,1.8773937984  
 H,0,-2.3274756862,1.9365768895,-1.5982894792  
 H,0,-4.1155406103,0.255003632,-1.4473089787  
 H,0,-0.6895737302,3.3110891632,0.2076256444  
 H,0,0.2823150152,2.3059220993,-0.8752450568  
 H,0,0.519713663,2.187719083,0.863039899  
 N,0,-0.3846453778,-1.4952874088,-0.1447001198  
 O,0,-0.8619257188,-1.4067051973,-1.1634881764  
 O,0,0.3071445431,-1.9651282199,0.6171940542  
 F,0,2.8396580493,1.5808750045,-0.1888375845  
 B,0,2.3717775299,0.2932108455,0.046393209  
 F,0,1.332858502,-0.0075522139,-0.8853975514  
 F,0,3.3875012839,-0.6462969628,-0.0937590685  
 F,0,1.8135076762,0.2071433886,1.3383310543

### TS NO2BF4 PCM PURE-M06-2X 3.055\_820543

M062X/6-311G\*  
 E(RM062X) = -900.933591759

Zero-point correction= 0.156954 (Hartree/Particle)  
 Thermal correction to Energy= 0.172137  
 Thermal correction to Enthalpy= 0.173081  
 Thermal correction to Gibbs Free Energy= 0.113049  
 Sum of electronic and ZPE= -900.776638  
 Sum of electronic and thermal Energies= -900.761454  
 Sum of electronic and thermal Enthalpies= -900.760510  
 Sum of electronic and thermal Free Energies= -900.820543

| E             | CV        | S         |
|---------------|-----------|-----------|
| KCal/Mol      | Cal/Mol-K | Cal/Mol-K |
| Total 108.018 | 53.205    | 126.350   |

C,0,-1.8128709796,-0.9661759901,-1.4369061229  
 C,0,-2.9716093019,-0.7342582824,-0.6976106016  
 C,0,-3.1084477198,0.458750475,0.0446547894  
 C,0,-2.1104917238,1.4515209066,0.0301925558  
 C,0,-0.9552590167,1.179838566,-0.6830300585  
 C,0,-0.8065939897,-0.0174242535,-1.408402822  
 C,0,-2.3057108206,2.7329623886,0.7911291474  
 H,0,-1.7052446189,-1.8958700626,-1.978191037  
 H,0,-3.7642857501,-1.4729947482,-0.6790223216  
 H,0,-4.0272813908,0.6355776095,0.5961083721  
 H,0,-0.1471702636,1.9036054963,-0.6897686764  
 H,0,0.1151405358,-0.191274677,-1.9516274984  
 H,0,-1.4270414423,3.3729112689,0.7194682186  
 H,0,-2.5012696874,2.5353262109,1.8476709067  
 H,0,-3.1634564936,3.2839001123,0.3992857729  
 N,0,-2.1362866097,-1.0869245663,1.5986018721  
 O,0,-1.0219982302,-0.9494581471,1.4749079369  
 O,0,-3.0603406697,-1.4357017304,2.1513541041  
 F,0,-1.8626753327,-3.2792955561,0.5699564192  
 B,0,-2.9893657646,-3.9527694726,0.0199673959  
 F,0,-4.1459835957,-3.3712411126,0.5685977912  
 F,0,-2.9905017965,-3.7623176152,-1.368296156  
 F,0,-2.924428338,-5.3025178201,0.3331470099

### TS NO2BF4 PCM PURE-M06-2X 2.4184\_820386

M062X/6-311G\*  
 E(RM062X) = -900.935155388

Zero-point correction= 0.157396 (Hartree/Particle)  
 Thermal correction to Energy= 0.172289  
 Thermal correction to Enthalpy= 0.173233  
 Thermal correction to Gibbs Free Energy= 0.114769  
 Sum of electronic and ZPE= -900.777760  
 Sum of electronic and thermal Energies= -900.762867  
 Sum of electronic and thermal Enthalpies= -900.761923  
 Sum of electronic and thermal Free Energies= -900.820386

| E             | CV        | S         |
|---------------|-----------|-----------|
| KCal/Mol      | Cal/Mol-K | Cal/Mol-K |
| Total 108.113 | 53.039    | 123.047   |

C,0,2.1902840767,-1.1657337018,-1.2140467939  
 C,0,1.1209839805,-0.3506208562,-1.6496642157  
 C,0,0.9459745463,0.9141892759,-1.1130782896  
 C,0,1.8122109411,1.3837463369,-0.1252783809  
 C,0,2.9045728667,0.5824030149,0.2667067824  
 C,0,3.1122019831,-0.6668460286,-0.2858831803  
 C,0,1.5549816224,2.7098952933,0.5224937977  
 H,0,2.3324585923,-2.1471724139,-1.652224348  
 H,0,0.4211432193,-0.7305452373,-2.3847773091  
 H,0,0.0956563138,1.5141709978,-1.4139484635  
 H,0,3.5865427599,0.9573307642,1.022310663  
 H,0,3.956436043,-1.2721154724,0.0208077812  
 H,0,2.3449459763,2.9813320583,1.2220066779  
 H,0,0.6027639631,2.6626838771,1.0563978101  
 H,0,1.4672003704,3.4961121554,-0.2305165776  
 N,0,0.467960043,-1.7431239342,0.3824408597  
 O,0,0.5668432277,-0.9643060168,1.1886657608  
 O,0,0.09477977,-2.7134260593,-0.0683134486  
 F,0,-1.5914240465,-0.7153143228,-0.3620240376  
 B,0,-2.0713566007,0.5468568941,0.0959992142  
 F,0,-1.1431786339,1.0533775506,1.0235788935  
 F,0,-2.1713396261,1.4134522872,-0.9954392994  
 F,0,-3.3089423884,0.3696455377,0.7024301037

### TS NO2BF4 PCM PURE-M06-2X 2.306\_820365

M062X/6-311G\*  
 E(RM062X) = -900.933212549

Zero-point correction= 0.157184 (Hartree/Particle)  
 Thermal correction to Energy= 0.172295  
 Thermal correction to Enthalpy= 0.173239  
 Thermal correction to Gibbs Free Energy= 0.112847  
 Sum of electronic and ZPE= -900.776028  
 Sum of electronic and thermal Energies= -900.760918  
 Sum of electronic and thermal Enthalpies= -900.759973  
 Sum of electronic and thermal Free Energies= -900.820365

| E             | CV        | S         |
|---------------|-----------|-----------|
| KCal/Mol      | Cal/Mol-K | Cal/Mol-K |
| Total 108.117 | 52.951    | 127.105   |

C,0,2.4348138537,-1.3145868312,0.7680728002  
 C,0,3.344440292,-0.9116576603,-0.2304283759  
 C,0,3.4188546733,0.4173099464,-0.5709974871  
 C,0,2.64099661,1.3898634668,0.1041151612  
 C,0,1.8117776578,0.9942661486,1.1524028843  
 C,0,1.7080301412,-0.3443001032,1.4939266243  
 C,0,2.715543961,2.8214194195,-0.3290181604  
 H,0,2.3731253861,-2.3573071761,1.0566676806  
 H,0,3.9442603428,-1.6516443078,-0.7456912397  
 H,0,4.0818317143,0.7381899315,-1.3673700807  
 H,0,1.2164904472,1.7302964689,1.6787983537  
 H,0,1.0346067867,-0.6570480575,2.2819587168  
 H,0,2.2223613955,3.4827971397,0.3816318032  
 H,0,2.2283256918,2.9397473803,-1.3012899489  
 H,0,3.7543120223,3.1363122785,-0.4483228357  
 N,0,0.5403344931,-1.2950610276,-0.5465764378  
 O,0,0.6098104285,-0.3890126427,-1.2223829897

O,0,0.0489529136,-2.2736739147,-0.2401924816  
 F,0,-1.0658270744,-0.0364504315,0.9175156755  
 B,0,-2.281551791,-0.0589040797,0.1738787442  
 F,0,-2.6503196421,1.2440583607,-0.1422014467  
 F,0,-2.028268266,-0.7883245756,-1.0079394655  
 F,0,-3.2669360375,-0.692598733,0.9225165055

### TS NO2BF4 PCM PURE-M06-2X 2.2457\_820277

M062X/6-311G\*  
 E(RM062X) = -900.934436028

Zero-point correction= 0.157405 (Hartree/Particle)  
 Thermal correction to Energy= 0.172196  
 Thermal correction to Enthalpy= 0.173141  
 Thermal correction to Gibbs Free Energy= 0.114159  
 Sum of electronic and ZPE= -900.777031  
 Sum of electronic and thermal Energies= -900.762240  
 Sum of electronic and thermal Enthalpies= -900.761295  
 Sum of electronic and thermal Free Energies= -900.820277

| E             | CV        | S         |
|---------------|-----------|-----------|
| KCal/Mol      | Cal/Mol-K | Cal/Mol-K |
| Total 108.055 | 52.527    | 124.137   |

C,0,2.1492601033,-0.995536205,1.1494984088  
 C,0,3.2064409239,-0.411843097,0.4446004345  
 C,0,2.9935350129,0.7935807323,-0.184211926  
 C,0,1.7577416558,1.4999035549,-0.0802715647  
 C,0,0.7389442499,0.9592765523,0.6746676526  
 C,0,0.9029314715,-0.3069746095,1.2525832274  
 C,0,1.6031564407,2.8056192441,-0.7959165693  
 H,0,2.2703147103,-1.9511706324,1.646327824  
 H,0,4.1582519819,-0.9206156061,0.3662909268  
 H,0,3.7885526082,1.2360443687,-0.7762579577  
 H,0,-0.2133938634,1.4652438982,0.77253443  
 H,0,0.0884773841,-0.735919998,1.8226234546  
 H,0,0.6087818191,3.2235885092,-0.6484719507  
 H,0,1.7695882194,2.6700880278,-1.8673194202  
 H,0,2.3464494045,3.5241040257,-0.4413491174  
 N,0,0.7232194993,-1.6578364031,-0.4538690311  
 O,0,0.9951841648,-1.1104999954,-1.4272010844  
 O,0,0.1965787766,-2.6024581844,-0.0490196378  
 F,0,-3.7024847419,-0.3303972301,0.0536387594  
 B,0,-2.4110433849,0.1348622126,0.2638671733  
 F,0,-2.0083713333,-0.1256626805,1.5900021393  
 F,0,-1.5136543045,-0.5279093582,-0.6085925905  
 F,0,-2.3347727981,1.5156048739,0.0275614194

### TS NO2BF4 PCM PURE-M06-2X 2.386\_820166

M062X/6-311G\*  
 E(RM062X) = -900.934054552

Zero-point correction= 0.157094 (Hartree/Particle)  
 Thermal correction to Energy= 0.172074  
 Thermal correction to Enthalpy= 0.173018  
 Thermal correction to Gibbs Free Energy= 0.113888

Sum of electronic and ZPE= -900.776961  
 Sum of electronic and thermal Energies= -900.761980  
 Sum of electronic and thermal Enthalpies= -900.761036  
 Sum of electronic and thermal Free Energies= -900.820166

E CV S  
 KCal/Mol Cal/Mol-K Cal/Mol-K  
 Total 107.978 53.080 124.449

C,0,2.662863955,-0.9538173389,0.5475773011  
 C,0,3.3029282193,-0.2085289197,-0.4644461782  
 C,0,2.9226250564,1.1050014067,-0.7080942142  
 C,0,1.9069793458,1.6929160432,0.0449535254  
 C,0,1.3044535926,0.9495578447,1.0837074962  
 C,0,1.6907066111,-0.3440657983,1.3544920805  
 C,0,1.4421679335,3.0920416289,-0.228583706  
 H,0,2.9655347348,-1.9748305725,0.7466419942  
 H,0,4.0831575053,-0.6713924534,-1.058721438  
 H,0,3.4059277924,1.6695326624,-1.4973040885  
 H,0,0.5156744311,1.4106338442,1.6687405269  
 H,0,1.2046108719,-0.9153445275,2.1328600637  
 H,0,1.4826084035,3.6928756309,0.6827024038  
 H,0,0.4016546884,3.0865211929,-0.5638367845  
 H,0,2.0473338095,3.5765611835,-0.9936278578  
 N,0,1.2116731408,-1.498052747,-1.2667639288  
 O,0,1.6323443187,-2.4963794572,-1.591615061  
 O,0,0.4771571154,-0.6436750417,-1.292070642  
 F,0,-1.7388376982,-3.6044856516,1.0699230283  
 B,0,-0.9276647509,-2.6751683606,0.44201542  
 F,0,-1.2685948854,-1.3690775348,0.808926283  
 F,0,0.4328088645,-2.8943887564,0.7826354555  
 F,0,-1.0188460553,-2.7947932776,-0.9635556795

### TS NO2BF4 PCM PURE-M06-2X 3.298\_819960

M062X/6-311G\*  
 E(RM062X) = -900.933597392

Zero-point correction= 0.157112 (Hartree/Particle)  
 Thermal correction to Energy= 0.172226  
 Thermal correction to Enthalpy= 0.173170  
 Thermal correction to Gibbs Free Energy= 0.113637  
 Sum of electronic and ZPE= -900.776485  
 Sum of electronic and thermal Energies= -900.761372  
 Sum of electronic and thermal Enthalpies= -900.760427  
 Sum of electronic and thermal Free Energies= -900.819960

E CV S  
 KCal/Mol Cal/Mol-K Cal/Mol-K  
 Total 108.073 53.194 125.297

C,0,1.8369650052,-1.0828215726,1.50959523  
 C,0,2.7631935911,-0.8856336433,0.5036692179  
 C,0,2.7097591776,0.2908534168,-0.2598534037  
 C,0,1.8022326727,1.3340556048,0.0452037579  
 C,0,0.8929678583,1.1200321001,1.0756957904  
 C,0,0.9008663086,-0.0793553906,1.7866185227  
 C,0,1.8535788962,2.6267445638,-0.7168847224  
 H,0,1.8234947552,-2.0164969138,2.055947248  
 H,0,3.4758863137,-1.6603161735,0.2584298039

H,0,3.434609487,0.4424241676,-1.0539498016  
 H,0,0.1679559223,1.8880603468,1.3209829957  
 H,0,0.1674532995,-0.2360417389,-2.5694560859  
 H,0,0.9071812932,3.1635814041,-0.6589633827  
 H,0,2.103611911,2.4635434957,-1.7671940194  
 H,0,2.632635914,3.2704658426,-0.2994443946  
 N,0,0.9770984273,-0.6439937116,-1.6440093248  
 O,0,0.1686128471,-0.9889791838,-0.9447207988  
 O,0,1.4638342751,-0.4583234501,-2.6487851267  
 F,0,2.7158560403,-3.8672508421,0.345153912  
 B,0,1.6924695085,-3.8094075711,-0.6086132158  
 F,0,0.4897746883,-3.4375407419,0.0051336961  
 F,0,2.0225867103,-2.8083745081,-1.5737267781  
 F,0,1.5561700977,-5.0321855006,-1.2548212919

### TS NO2BF4 PCM PURE-M06-2X 3.271\_819957

M062X/6-311G\*  
 E(RM062X) = -900.933728827

Zero-point correction= 0.157401 (Hartree/Particle)  
 Thermal correction to Energy= 0.172492  
 Thermal correction to Enthalpy= 0.173437  
 Thermal correction to Gibbs Free Energy= 0.113771  
 Sum of electronic and ZPE= -900.776328  
 Sum of electronic and thermal Energies= -900.761236  
 Sum of electronic and thermal Enthalpies= -900.760292  
 Sum of electronic and thermal Free Energies= -900.819957

E CV S  
 KCal/Mol Cal/Mol-K Cal/Mol-K  
 Total 108.241 53.059 125.576

C,0,2.0147245719,-1.1252880247,-1.4900910494  
 C,0,1.059779281,-0.1605400593,-1.8277095093  
 C,0,0.9893292932,1.0583437247,-1.1519250528  
 C,0,1.8532627368,1.3305304039,-0.097717552  
 C,0,2.7767373362,0.3237029595,0.2721494996  
 C,0,2.8935110742,-0.8725584308,-0.4539638696  
 C,0,1.840384541,2.6460753052,0.6262318171  
 H,0,2.0490223134,-2.0756740742,-2.0056122586  
 H,0,0.3595667283,-0.3626213342,-2.6304979758  
 H,0,0.249504584,1.7949143758,-1.4453690535  
 H,0,3.4666407682,0.520425166,1.0873298555  
 H,0,3.6187333885,-1.6189302322,-0.1603976655  
 H,0,2.6072867645,3.3046835627,0.2092934368  
 H,0,2.0670004808,2.5228279179,1.6872041928  
 H,0,0.8782103481,3.1480084427,0.5279407867  
 N,0,1.0402862801,-0.6716892205,1.5994317243  
 O,0,0.2515015489,-1.0137475662,0.8764064625  
 O,0,1.5002584382,-0.4953444328,2.6184699349  
 F,0,2.0695001341,-2.8482054502,1.5675773602  
 B,0,1.7915647562,-3.8281023948,0.5661532857  
 F,0,0.6136287469,-3.4509722039,-0.0915142729  
 F,0,2.8572608806,-3.8541359272,-0.3421109865  
 F,0,1.637840005,-5.0680345077,1.17433589

## TS NO2BF4 PCM PURE-M06-2X 2.6887\_819594

M062X/6-311G\*

E(RM062X) = -900.934845641

Zero-point correction= 0.157950 (Hartree/Particle)  
 Thermal correction to Energy= 0.172816  
 Thermal correction to Enthalpy= 0.173760  
 Thermal correction to Gibbs Free Energy= 0.115252  
 Sum of electronic and ZPE= -900.776895  
 Sum of electronic and thermal Energies= -900.762030  
 Sum of electronic and thermal Enthalpies= -900.761086  
 Sum of electronic and thermal Free Energies= -900.819594

| E             | CV        | S         |
|---------------|-----------|-----------|
| KCal/Mol      | Cal/Mol-K | Cal/Mol-K |
| Total 108.444 | 52.746    | 123.141   |

C,0,-2.3725152963,-1.1840582138,1.1802241997  
 C,0,-1.1890446447,-0.4904891317,1.5129147256  
 C,0,-0.9206141857,0.775918181,0.9630481065  
 C,0,-1.7459657119,1.3018590992,-0.017590935  
 C,0,-2.8839706831,0.5662604278,-0.3866438966  
 C,0,-3.2128158336,-0.648680789,0.2211127556  
 C,0,-1.4179471479,2.6124736492,-0.6756482  
 H,0,-2.5962376045,-2.1325144265,1.6538465104  
 H,0,-0.5154102947,-0.8892222495,2.2624521902  
 H,0,-0.0335371949,1.3120545525,1.2727010583  
 H,0,-3.5314833868,0.9582404204,-1.165223398  
 H,0,-4.1115976862,-1.174317721,-0.0768798545  
 H,0,-2.0526399542,3.410877638,-0.282837663  
 H,0,-1.5829970548,2.5599411855,-1.7531185418  
 H,0,-0.3763671507,-2.8772813765,-0.4948817359  
 N,0,-0.1633184527,-1.5387271379,-0.3106456323  
 O,0,-0.7038767832,-1.203440821,-1.2445621902  
 O,0,0.6153827433,-2.148982988,0.2413958331  
 F,0,1.4332237942,0.2326235577,-0.8146430045  
 B,0,2.2379187357,0.6944580781,0.2628490652  
 F,0,3.5793278775,0.5381533754,-0.0526262894  
 F,0,1.9337089097,2.0411034207,0.5017613738  
 F,0,1.9053370053,-0.0710614835,1.3982605229

## TS NO2BF4 PCM PURE-M06-2X 2.586\_819521utf00004

M062X/6-311G\*

E(RM062X) = -900.932715643

Zero-point correction= 0.157029 (Hartree/Particle)  
 Thermal correction to Energy= 0.172176  
 Thermal correction to Enthalpy= 0.173120  
 Thermal correction to Gibbs Free Energy= 0.113195  
 Sum of electronic and ZPE= -900.775687  
 Sum of electronic and thermal Energies= -900.760540  
 Sum of electronic and thermal Enthalpies= -900.759596  
 Sum of electronic and thermal Free Energies= -900.819521

| E             | CV        | S         |
|---------------|-----------|-----------|
| KCal/Mol      | Cal/Mol-K | Cal/Mol-K |
| Total 108.042 | 53.172    | 126.123   |

C,0,1.7424109949,-1.0657520108,1.2509626052  
 C,0,2.7843586054,-0.7104945076,0.3685934925  
 C,0,2.8489304486,0.5801054748,-0.1893436899  
 C,0,1.8358337633,1.4898172295,0.0507061562  
 C,0,0.7800296286,1.1021905693,0.9061395654  
 C,0,0.7391630437,-0.1427605415,1.5163320956  
 C,0,1.8283761124,2.8573327324,-0.5706790585  
 H,0,1.7050388707,-2.0546453143,1.689503834  
 H,0,3.5890493295,-1.4126608398,0.1828232818  
 H,0,3.681964984,0.8426522415,-0.8317495963  
 H,0,-0.0224875481,1.8095872037,1.090998154  
 H,0,-0.0864780378,-0.4181791643,2.1563103693  
 H,0,1.7478096206,3.6284206805,0.1982193754  
 H,0,0.9688011846,2.9702436188,-1.2356923683  
 H,0,2.7346272197,3.0383929924,-1.1474486497  
 N,0,1.3267839627,-1.5862240304,-1.247554152  
 O,0,0.4824019787,-0.8475838501,-1.3756090543  
 O,0,1.9246383344,-2.5007733155,-1.5557900154  
 F,0,-0.740151014,-2.6698818339,2.1132128465  
 B,0,-1.1559887508,-2.7578376243,0.7765484202  
 F,0,-1.577844528,-1.5005471787,0.3233727767  
 F,0,-0.0409928985,-3.1571200324,-0.0141813447  
 F,0,-2.1740973046,-3.6940224994,0.6434629565

## TS NO2BF4 PCM PURE-M06-2X 2.8006\_818867

M062X/6-311G\*

E(RM062X) = -900.933304698

Zero-point correction= 0.157588 (Hartree/Particle)  
 Thermal correction to Energy= 0.172608  
 Thermal correction to Enthalpy= 0.173552  
 Thermal correction to Gibbs Free Energy= 0.114438  
 Sum of electronic and ZPE= -900.775717  
 Sum of electronic and thermal Energies= -900.760697  
 Sum of electronic and thermal Enthalpies= -900.759753  
 Sum of electronic and thermal Free Energies= -900.818867

| E             | CV        | S         |
|---------------|-----------|-----------|
| KCal/Mol      | Cal/Mol-K | Cal/Mol-K |
| Total 108.313 | 52.989    | 124.415   |

C,0,-0.3368855723,-1.3350395877,0.4407082457  
 C,0,-0.6992460203,-0.2460071839,1.2512930834  
 C,0,-2.0252881806,0.2424587292,1.2539477875  
 C,0,-2.9735819897,-0.283042188,0.3878985258  
 C,0,-2.570846589,-1.322223632,-0.4628590138  
 C,0,-1.278479545,-1.8552288926,-0.4277501787  
 C,0,-4.3823453643,0.2412282261,0.3359469083  
 H,0,0.6731575474,-1.7222661924,0.4745503158  
 H,0,0.0333747258,0.167640295,1.9326837633  
 H,0,-2.2892859595,1.0523365611,1.9264931589  
 H,0,-3.2924152948,-1.7328204269,-1.16282063  
 H,0,-1.0178970767,-2.6708455468,-1.0912182302  
 H,0,-5.1007313367,-0.5659165994,0.4913084722  
 H,0,-4.5938581327,0.685383102,-0.6394482506  
 H,0,-4.5500744977,0.9999129807,1.0999107802  
 N,0,-0.2978100994,1.3201865102,-0.4490243388  
 O,0,-0.8309265641,0.9471586756,-1.372092065

O,0,0.3246022042,2.0658022223,0.1313859366  
 F,0,2.2005819251,0.2936250398,1.0016212795  
 B,0,2.6736879842,-0.1637901783,-0.2447614792  
 F,0,2.8133823605,-1.5538729782,-0.2078804074  
 F,0,1.6950244288,0.1733700799,-1.2220176065  
 F,0,3.8772160471,0.4496569845,-0.5610520571

## TS NO2BF4 PCM PURE-M06-2X 2.801\_818858

M062X/6-311G\*

E(RM062X) = -900.933304728

Zero-point correction= 0.157591 (Hartree/Particle)  
 Thermal correction to Energy= 0.172609  
 Thermal correction to Enthalpy= 0.173553  
 Thermal correction to Gibbs Free Energy= 0.114446  
 Sum of electronic and ZPE= -900.775714  
 Sum of electronic and thermal Energies= -900.760696  
 Sum of electronic and thermal Enthalpies= -900.759751  
 Sum of electronic and thermal Free Energies= -900.818858

| E             | CV        | S         |
|---------------|-----------|-----------|
| KCal/Mol      | Cal/Mol-K | Cal/Mol-K |
| Total 108.314 | 52.988    | 124.401   |

C,0,-1.3716701134,-0.6558325213,1.2418092285  
 C,0,-0.9355301892,0.6527453759,1.1479833968  
 C,0,-1.7042533507,1.6014619389,0.4663799415  
 C,0,-2.9430290054,1.2851887776,-0.1091750597  
 C,0,-3.375857617,-0.0301816176,-0.0201096267  
 C,0,-2.5759558681,-1.0098265211,0.6103670697  
 C,0,-3.750401349,2.3438372078,-0.8088823159  
 H,0,-0.7861552695,-1.4097000798,1.7518622925  
 H,0,0.0069603981,0.9475677583,1.5930847547  
 H,0,-1.3379677968,2.6207947171,0.3889874731  
 H,0,-4.3252949637,-0.3233657068,-0.4566037779  
 H,0,-2.9230196865,-2.0330932838,0.6782408852  
 H,0,-3.939152002,3.188368415,-0.1434103562  
 H,0,-4.7101655353,1.9516498371,-1.144157937  
 H,0,-3.2139527562,2.7263834854,-1.6802526053  
 N,0,-1.5497085221,-1.2843507278,-1.4815939459  
 O,0,-1.9819360787,-2.2901398807,-1.7676263971  
 O,0,-0.926219418,-0.3608712124,-1.6656679411  
 F,0,0.4172319424,-2.3368186567,-0.5292130986  
 B,0,0.2064885118,-3.4218460944,0.3678913745  
 F,0,0.8221677143,-4.5617763407,-0.1284223347  
 F,0,0.7223587909,-3.0776909855,1.6203375822  
 F,0,-1.185151836,-3.6194638846,0.4716783974

## TS NO2BF4 PCM PURE-M06-2X 2.8758\_818627

M062X/6-311G\*

E(RM062X) = -900.932099320

Zero-point correction= 0.157024 (Hartree/Particle)  
 Thermal correction to Energy= 0.171983  
 Thermal correction to Enthalpy= 0.172927  
 Thermal correction to Gibbs Free Energy= 0.113472

Sum of electronic and ZPE= -900.775075  
 Sum of electronic and thermal Energies= -900.760116  
 Sum of electronic and thermal Enthalpies= -900.759172  
 Sum of electronic and thermal Free Energies= -900.818627

| E             | CV        | S         |
|---------------|-----------|-----------|
| KCal/Mol      | Cal/Mol-K | Cal/Mol-K |
| Total 107.921 | 52.799    | 125.133   |

C,0,-0.1779094973,-1.4172019709,0.0343672086  
 C,0,-1.1399073529,-1.829042212,0.9266388414  
 C,0,-2.4966567711,-1.4548179549,0.7690119393  
 C,0,-2.9239379546,-0.6716222814,-0.2867654006  
 C,0,-1.9349245152,-0.1983408315,-1.1662605582  
 C,0,-0.5648532458,-0.5608860166,-1.0053518642  
 C,0,-4.3626490769,-0.2873855503,-0.4821975585  
 H,0,0.8631472008,-1.6875211945,0.1500799224  
 H,0,-0.8657456119,-2.4520557157,1.7698008167  
 H,0,-3.219863819,-1.8029226249,1.498841255  
 H,0,-2.214635207,0.4274827183,-2.0083514531  
 H,0,0.177425689,-0.2086557021,-1.710800007  
 H,0,-5.0048006707,-0.7941554235,0.2367949814  
 H,0,-4.6981571394,-0.5470015085,-1.4877130002  
 H,0,-4.4938546384,0.7901111381,-0.3590558006  
 N,0,-0.8531518506,1.3782220293,0.0226746633  
 O,0,-1.0573828151,1.1955912709,1.1359391979  
 O,0,-0.5449167965,2.1773565081,-0.7466933479  
 F,0,2.3363407419,-0.18952417,-1.303202978  
 B,0,2.6639364592,0.2522221151,-0.0055172231  
 F,0,3.7983986387,1.052982433,-0.0421154099  
 F,0,1.5670819061,0.9971850076,0.4974497674  
 F,0,2.8681903266,-0.8625200636,0.8185130077

## TS NO2BF4 PCM PURE-M06-2X 2.778\_818581

M062X/6-311G\*

E(RM062X) = -900.931834829

Zero-point correction= 0.157319 (Hartree/Particle)  
 Thermal correction to Energy= 0.172491  
 Thermal correction to Enthalpy= 0.173435  
 Thermal correction to Gibbs Free Energy= 0.113253  
 Sum of electronic and ZPE= -900.774516  
 Sum of electronic and thermal Energies= -900.759344  
 Sum of electronic and thermal Enthalpies= -900.758400  
 Sum of electronic and thermal Free Energies= -900.818581

| E             | CV        | S         |
|---------------|-----------|-----------|
| KCal/Mol      | Cal/Mol-K | Cal/Mol-K |
| Total 108.239 | 53.065    | 126.662   |

C,0,-1.0050072795,0.2799496525,1.5231762953  
 C,0,-2.2897475524,0.7333179202,1.1771116556  
 C,0,-3.1695133393,-0.0892267958,0.4405294196  
 C,0,-2.7467474128,-1.3194120369,-0.0418073752  
 C,0,-1.4359205739,-1.7217263745,0.2577673947  
 C,0,-0.5809174981,-0.9458217731,1.0447147868  
 C,0,-3.6405703038,-2.1891523225,-0.8822337129  
 H,0,-0.3611461264,0.9133578001,2.1166386597  
 H,0,-2.6256875557,1.6923191544,1.5516583796

H,0,-4.175294961,0.2617522412,0.2331031748  
 H,0,-1.0818278089,-2.674571494,-0.1241124013  
 H,0,0.4168883995,-1.3037606353,1.2671843352  
 H,0,-3.3492484756,-2.1349772639,-1.9343029912  
 H,0,-4.6820066867,-1.877475593,-0.8041494876  
 H,0,-3.5689584979,-3.2334874884,-0.5750855697  
 N,0,-1.5274760886,1.5818464959,-0.8744236835  
 O,0,-1.9524229224,2.6278902878,-0.8015344589  
 O,0,-0.9830037912,0.7424961846,-1.3972316359  
 F,0,-0.7656106117,3.2347801648,1.6750460703  
 B,0,0.3290610529,3.5221718034,0.8324563293  
 F,0,1.4557873991,3.8135856994,1.586682589  
 F,0,0.5728665241,2.3615691053,0.0401942687  
 F,0,-0.0051618898,4.5757002677,-0.0169100423

### TS NO2BF4 PCM PURE-M06-2X 2.840\_818475

M062X/6-311G\*  
 E(RM062X) = -900.931718302

Zero-point correction= 0.157209 (Hartree/Particle)  
 Thermal correction to Energy= 0.172398  
 Thermal correction to Enthalpy= 0.173342  
 Thermal correction to Gibbs Free Energy= 0.113243  
 Sum of electronic and ZPE= -900.774509  
 Sum of electronic and thermal Energies= -900.759320  
 Sum of electronic and thermal Enthalpies= -900.758376  
 Sum of electronic and thermal Free Energies= -900.818475

| E             | CV        | S         |
|---------------|-----------|-----------|
| KCal/Mol      | Cal/Mol-K | Cal/Mol-K |
| Total 108.182 | 53.116    | 126.490   |

C,0,2.6536422561,-0.9929999484,0.5636206246  
 C,0,3.1583163724,-0.2790537774,-0.533788446  
 C,0,2.7903488062,1.0732308853,-0.7446874421  
 C,0,1.8550094252,1.6920344141,0.0771222616  
 C,0,1.3053652233,0.9305289509,1.1129049969  
 C,0,1.7044411042,-0.3904685592,1.3623224748  
 C,0,1.4165626468,3.111746618,-0.1561965167  
 H,0,2.9526312603,-2.0188128985,0.7208572409  
 H,0,3.9002928048,-0.739472615,-1.17522762  
 H,0,3.2355370637,1.6186079521,-1.5712101139  
 H,0,0.5496719722,1.3799921178,1.74993015  
 H,0,1.2539937529,-0.9395083454,2.1801515236  
 H,0,1.3587877725,3.6602110128,0.7849044082  
 H,0,0.4248420086,3.1379091423,-0.6144528317  
 H,0,2.1078484278,3.6346071064,-0.816907556  
 N,0,1.3882615201,-0.6759381156,-1.9586822029  
 O,0,1.9299163371,-0.8602473875,-2.9394180418  
 O,0,0.4466342083,-0.6283231276,-1.3335249735  
 F,0,1.263001083,-4.9893491456,-1.3935587524  
 B,0,1.2192602327,-3.6070750478,-1.318762625  
 F,0,0.6827193165,-3.1837656301,-0.0950177196  
 F,0,2.5219453601,-3.0612089381,-1.4488797693  
 F,0,0.4384110453,-3.0726466635,-2.3669220696

### TS NO2BF4 PCM PURE-M06-2X 3.1393\_818379

M062X/6-311G\*  
 E(RM062X) = -900.933595319

Zero-point correction= 0.157755 (Hartree/Particle)  
 Thermal correction to Energy= 0.172498  
 Thermal correction to Enthalpy= 0.173442  
 Thermal correction to Gibbs Free Energy= 0.115216  
 Sum of electronic and ZPE= -900.775840  
 Sum of electronic and thermal Energies= -900.761097  
 Sum of electronic and thermal Enthalpies= -900.760153  
 Sum of electronic and thermal Free Energies= -900.818379

| E             | CV        | S         |
|---------------|-----------|-----------|
| KCal/Mol      | Cal/Mol-K | Cal/Mol-K |
| Total 108.244 | 52.837    | 122.548   |

C,0,-3.3235559084,-0.2403805492,-0.5207739974  
 C,0,-2.8781311179,-0.4202213903,0.777873035  
 C,0,-1.7576465175,0.3080580222,1.2444675247  
 C,0,-1.1334059884,1.287473413,0.4484256038  
 C,0,-1.573265173,1.4174164635,-0.8613523907  
 C,0,-2.6473680248,0.6606097657,-1.3421372351  
 C,0,-0.0416549077,2.1461792475,1.0102486085  
 H,0,-4.1670544932,-0.8043595493,-0.8979606492  
 H,0,-3.3651893758,-1.1276139754,1.4399434876  
 H,0,-1.4287666039,0.1753199425,2.2704588066  
 H,0,-1.070397552,2.1115445318,-1.5244485535  
 H,0,-2.961715063,0.785062015,-2.3722086451  
 H,0,0.5920240481,1.5777330943,1.6899725585  
 H,0,-0.4801871847,2.9804424712,1.5652664955  
 H,0,0.5886359467,2.5434875651,0.2172970347  
 N,0,-0.6207997364,-1.5678297531,0.3671568999  
 O,0,-0.4427956481,-2.1519703977,1.3221083221  
 O,0,-0.5414729989,-1.392640788,-0.7429983798  
 F,0,3.1075735489,-0.7572368735,-0.8288008972  
 B,0,2.2075641028,0.1523688672,-0.2802387995  
 F,0,1.2794575901,0.5613759927,-1.251374923  
 F,0,1.4808769465,-0.4958653794,0.7667519857  
 F,0,2.8742831716,1.2539842641,0.248560108

### TS NO2BF4 PCM PURE-M06-2X 3.052\_818171

M062X/6-311G\*  
 E(RM062X) = -900.934049352

Zero-point correction= 0.157910 (Hartree/Particle)  
 Thermal correction to Energy= 0.172527  
 Thermal correction to Enthalpy= 0.173471  
 Thermal correction to Gibbs Free Energy= 0.115879  
 Sum of electronic and ZPE= -900.776140  
 Sum of electronic and thermal Energies= -900.761522  
 Sum of electronic and thermal Enthalpies= -900.760578  
 Sum of electronic and thermal Free Energies= -900.818171

| E             | CV        | S         |
|---------------|-----------|-----------|
| KCal/Mol      | Cal/Mol-K | Cal/Mol-K |
| Total 108.262 | 52.647    | 121.214   |

C,0,-2.0181286716,-0.8468271888,0.9555131106  
 C,0,-1.6402772598,0.3403913135,1.560641443  
 C,0,-1.9393753415,1.5838888026,0.9377283154  
 C,0,-2.7216159469,1.6446499021,-0.2349822198  
 C,0,-3.031913573,0.4407471178,-0.8467852106  
 C,0,-2.6785896645,-0.786957826,-0.267866971  
 C,0,-3.1923868878,2.9447625539,-0.8136126851  
 H,0,-1.7791202651,-1.7993055535,1.410227589  
 H,0,-1.095400059,0.3375228295,2.4981566861  
 H,0,-1.6585097821,2.5061636442,1.4346387603  
 H,0,-3.5724940355,0.4465373266,-1.7871405767  
 H,0,-2.9410668403,-1.7056743798,-0.7800439302  
 H,0,-2.8035105569,3.7946793524,-0.2580998679  
 H,0,-4.2845249974,2.9773338918,-0.7976009777  
 H,0,-2.8593735506,3.0307424419,-1.8480032587  
 N,0,0.108966335,1.1443588073,0.0483651966  
 O,0,-0.0578730115,0.5087311552,-0.8768731349  
 O,0,0.8188603814,1.7278017798,0.7232453318  
 F,0,-0.3925887379,3.4520015409,-0.8820192319  
 B,0,0.1188944672,3.1751291378,-2.1789862943  
 F,0,-0.8057059113,2.3583064451,-2.8462615761  
 F,0,0.3327833907,4.3556798092,-2.8715444557  
 F,0,1.3233685183,2.4675180963,-2.0050560421

### TS NO2BF4 PCM PURE-M06-2X 2.8774\_817851

M062X/6-311G\*  
 E(RM062X) = -900.932123346

Zero-point correction= 0.157359 (Hartree/Particle)  
 Thermal correction to Energy= 0.172184  
 Thermal correction to Enthalpy= 0.173128  
 Thermal correction to Gibbs Free Energy= 0.114273  
 Sum of electronic and ZPE= -900.774764  
 Sum of electronic and thermal Energies= -900.759940  
 Sum of electronic and thermal Enthalpies= -900.758995  
 Sum of electronic and thermal Free Energies= -900.817851

| E             | CV        | S         |
|---------------|-----------|-----------|
| KCal/Mol      | Cal/Mol-K | Cal/Mol-K |
| Total 108.047 | 52.687    | 123.871   |

C,0,-0.3055309097,-1.4444425884,0.1370791381  
 C,0,-0.6115834833,-0.4254350119,1.0486605156  
 C,0,-1.9272315792,0.1241594451,1.0977238567  
 C,0,-2.939842152,-0.3258666099,0.2333320532  
 C,0,-2.5845063842,-1.2828833579,-0.6988622072  
 C,0,-1.2835875774,-1.8401003712,-0.745432729  
 C,0,-4.3181523552,0.2673574912,0.2988033963  
 H,0,0.6945296209,-1.8557263555,0.1049316704  
 H,0,0.1461144674,-0.0859021541,1.7438543201  
 H,0,-2.1508991025,0.877995239,1.8462648629  
 H,0,-3.3234743013,-1.6273199814,-1.4146660261  
 H,0,-1.065533034,-2.5926918708,-1.4939810742  
 H,0,-4.6509520787,0.3671814151,1.3328006572  
 H,0,-5.0363326954,-0.3506460587,-0.2385355459  
 H,0,-4.3258020872,1.264163608,-0.1496116754  
 N,0,-0.6136173513,1.3953869915,-0.2095120296  
 O,0,-0.7977603067,1.1047936613,-1.3034263137

O,0,-0.2337305848,2.2392742779,0.4755843079  
 F,0,2.2998382808,-0.3985605098,1.458161478  
 B,0,2.7274466814,-0.1521117369,0.137985622  
 F,0,2.8124761883,-1.3702837741,-0.5492515457  
 F,0,1.7558268031,0.6631999027,-0.4963372508  
 F,0,3.954967941,0.4980163488,0.1435545189

### TS NO2BF4 PCM PURE-M06-2X 2.776\_817301utf00003

M062X/6-311G\*  
 E(RM062X) = -900.930633255

Zero-point correction= 0.157417 (Hartree/Particle)  
 Thermal correction to Energy= 0.172413  
 Thermal correction to Enthalpy= 0.173357  
 Thermal correction to Gibbs Free Energy= 0.113332  
 Sum of electronic and ZPE= -900.773216  
 Sum of electronic and thermal Energies= -900.758220  
 Sum of electronic and thermal Enthalpies= -900.757276  
 Sum of electronic and thermal Free Energies= -900.817301

| E             | CV        | S         |
|---------------|-----------|-----------|
| KCal/Mol      | Cal/Mol-K | Cal/Mol-K |
| Total 108.191 | 52.726    | 126.334   |

C,0,-1.8289284203,-0.7657565707,0.8939667526  
 C,0,-1.4292142008,0.4485207917,1.3975171205  
 C,0,-1.9517626803,1.6414831128,0.8645165234  
 C,0,-2.9136562163,1.6572448101,-0.1499626209  
 C,0,-3.3041000821,0.431850542,-0.6711649732  
 C,0,-2.7127591118,-0.7792905041,-0.2066267225  
 C,0,-3.4703526618,2.9556427973,-0.6640412538  
 H,0,-1.4275799058,-1.6971950941,1.2662599702  
 H,0,-0.7085015585,0.4999820375,2.2038956141  
 H,0,-1.6042883109,2.5879927841,1.2670138431  
 H,0,-4.0342218903,0.3834111453,-1.4726784629  
 H,0,-3.0673643874,-1.7274021091,-0.5905436444  
 H,0,-3.8157326455,3.5810648612,0.1603405897  
 H,0,-4.3068703483,2.7860989398,-1.3409505379  
 H,0,-2.7022737068,3.5139037561,-1.2037152014  
 N,0,-1.3137299306,-0.4556674069,-1.8166460622  
 O,0,-0.4747100387,0.2393009622,-1.4720308649  
 O,0,-1.7207921734,-1.0954022849,-2.6756956276  
 F,0,-0.4826909172,-2.6022484646,-0.7816522722  
 B,0,0.7056052131,-2.8983295438,-1.5121423529  
 F,0,1.7881076479,-2.9054288473,-0.6376427995  
 F,0,0.5621302065,-4.1318240879,-2.139139272  
 F,0,0.8669431193,-1.8811706269,-2.4736527452

### Pi Complexes for Toluene + NO<sub>2</sub><sup>+</sup>BF<sub>4</sub><sup>-</sup> M062X/6-311G\*/PCM(CH<sub>2</sub>Cl<sub>2</sub>)

#### Pi Complex NO<sub>2</sub>BF<sub>4</sub> PCM PURE-M06-2X 2.896\_825610

M062X/6-311G\*  
 E(RM062X) = -900.938583160

Zero-point correction= 0.157970 (Hartree/Particle)

Thermal correction to Energy= 0.173870  
 Thermal correction to Enthalpy= 0.174814  
 Thermal correction to Gibbs Free Energy= 0.112973  
 Sum of electronic and ZPE= -900.780613  
 Sum of electronic and thermal Energies= -900.764713  
 Sum of electronic and thermal Enthalpies= -900.763769  
 Sum of electronic and thermal Free Energies= -900.825610

E CV S  
 KCal/Mol Cal/Mol-K Cal/Mol-K  
 Total 109.105 54.829 130.156

C,0,-3.2836712936,-3.3582062958,-0.449190649  
 C,0,-3.9330774419,-2.9881248327,-1.6263685303  
 C,0,-3.2454164433,-3.010560022,-2.8383459772  
 C,0,-1.9063866986,-3.4040773131,-2.8933543143  
 C,0,-1.2704718,-3.783830116,-1.7073939679  
 C,0,-1.9455065851,-3.7574682186,-0.4940817299  
 C,0,-1.1302674297,-3.3984087368,-4.1820879906  
 H,0,-3.8165708741,-3.3412325678,0.4954529982  
 H,0,-4.9735623575,-2.6837983356,-1.5998906655  
 H,0,-3.7537271621,-2.7102135931,-3.7492115684  
 H,0,-0.2235867247,-4.0609200392,-1.7263104317  
 H,0,-1.4211641046,-4.0310882905,0.4138746319  
 H,0,-1.7245397998,-3.0149967227,-5.0117764418  
 H,0,-0.7973010016,-4.406915915,-4.4384815515  
 H,0,-0.2364965291,-2.7785092305,-4.0773093117  
 N,0,-2.0461247957,-0.7397862508,-0.4447840209  
 O,0,-2.4720632102,-0.5726430738,0.5663572785  
 O,0,-1.6601406985,-0.8129227261,-1.4775979773  
 F,0,2.1723628474,-1.2237550177,0.2454487076  
 B,0,1.0572297089,-1.9136897121,-0.2057501149  
 F,0,0.8232240511,-1.6443513963,-1.5630868136  
 F,0,1.1951586826,-3.2839813721,0.0055679402  
 F,0,-0.0934391401,-1.4547164216,0.5224070001

### Pi Complex NO<sub>2</sub>BF<sub>4</sub> PCM PURE-M06-2X 2.910\_824610

M062X/6-311G\*  
 E(RM062X) = -900.938478053

Zero-point correction= 0.158515 (Hartree/Particle)  
 Thermal correction to Energy= 0.174305  
 Thermal correction to Enthalpy= 0.175249  
 Thermal correction to Gibbs Free Energy= 0.113868  
 Sum of electronic and ZPE= -900.779963  
 Sum of electronic and thermal Energies= -900.764173  
 Sum of electronic and thermal Enthalpies= -900.763229  
 Sum of electronic and thermal Free Energies= -900.824610

E CV S  
 KCal/Mol Cal/Mol-K Cal/Mol-K  
 Total 109.378 54.646 129.186

C,0,-0.8391229782,-0.0056112486,1.3390893934  
 C,0,-1.9779336709,0.7705402966,1.1263326469  
 C,0,-3.0518627151,0.2605016238,0.3945930617  
 C,0,-3.0091224776,-1.0324639307,-0.1267477319  
 C,0,-1.8603499394,-1.8030910042,0.0979668378  
 C,0,-0.7855957315,-1.2992883781,0.8189471044

C,0,-4.1615256433,-1.6031429336,-0.9100092195  
 H,0,0.0050781194,0.3878624286,1.8912817371  
 H,0,-2.0314610951,1.7754681313,1.5328262084  
 H,0,-3.9331785141,0.8737111352,0.2354607317  
 H,0,-1.8125411077,-2.8097330069,-0.3067214644  
 H,0,0.1086437177,-1.8919615648,0.9667248976  
 H,0,-3.8381611092,-1.9272620932,-1.901857151  
 H,0,-4.9614024723,-0.8727218581,-1.0329364628  
 H,0,-4.5758804664,-2.4777702365,-0.4030295529  
 N,0,-0.3126887202,1.2360925935,-1.239618166  
 O,0,-0.7108438784,0.3456085483,-1.7638660636  
 O,0,0.0492179327,2.1858788309,-0.8004106088  
 F,0,1.6329973486,0.0983181963,-0.7495039287  
 B,0,2.3814002505,0.3962346161,0.4397277516  
 F,0,1.8644994432,1.5944154415,0.9585034396  
 F,0,2.1953962769,-0.6394493273,1.352713726  
 F,0,3.7181454307,0.5408087403,0.1065718133

### Pi Complex NO<sub>2</sub>BF<sub>4</sub> PCM PURE-M06-2X 2.924\_825224

M062X/6-311G\*  
 E(RM062X) = -900.938771871

Zero-point correction= 0.158242 (Hartree/Particle)  
 Thermal correction to Energy= 0.174070  
 Thermal correction to Enthalpy= 0.175015  
 Thermal correction to Gibbs Free Energy= 0.113548  
 Sum of electronic and ZPE= -900.780530  
 Sum of electronic and thermal Energies= -900.764702  
 Sum of electronic and thermal Enthalpies= -900.763757  
 Sum of electronic and thermal Free Energies= -900.825224

E CV S  
 KCal/Mol Cal/Mol-K Cal/Mol-K  
 Total 109.231 54.755 129.368

C,0,2.7352194338,-0.1304843549,-2.2094330029  
 C,0,1.6567446806,0.7596443271,-2.1996293365  
 C,0,1.678766639,1.889025515,-3.0078280212  
 C,0,2.7769403513,2.1622083204,-3.829446413  
 C,0,3.8461826708,1.2639876354,-3.8361367146  
 C,0,3.8278444161,0.122655279,-3.0358033727  
 C,0,2.7914487912,3.4180722661,-4.6569011295  
 H,0,2.7171969376,-1.0167171743,-1.5841048285  
 H,0,0.8046815371,0.5798449339,-1.5534609641  
 H,0,0.8522867608,2.5884853141,-2.9707743531  
 H,0,4.7063335911,1.4617755623,-4.4678929841  
 H,0,4.6650093005,-0.5661021577,-3.0556649425  
 H,0,1.9913162175,3.4008875805,-5.4008697131  
 H,0,3.7392595641,3.5454252812,-5.1804538588  
 H,0,2.6230378113,4.2853037056,-4.0149323935  
 N,0,3.668908819,1.9091119825,-0.3340100997  
 O,0,3.9301177526,2.6328194672,-1.1271794105  
 O,0,3.4990440812,1.1890789443,0.4929116681  
 F,0,2.0485467083,4.4409382564,-1.4852247969  
 B,0,1.1187309046,4.0494620953,-0.5084303862  
 F,0,0.8885411818,5.0828140162,0.3870480537  
 F,0,-0.0666188763,3.6230519909,-1.1009185959  
 F,0,1.6946426259,2.9419955133,0.2039746953



### Pi Complex NO<sub>2</sub>BF<sub>4</sub> PCM PURE-M06-2X 2.926\_823642

M062X/6-311G\*

E(RM062X) = -900.935838798

Zero-point correction= 0.158157 (Hartree/Particle)  
 Thermal correction to Energy= 0.174117  
 Thermal correction to Enthalpy= 0.175062  
 Thermal correction to Gibbs Free Energy= 0.112197  
 Sum of electronic and ZPE= -900.777682  
 Sum of electronic and thermal Energies= -900.761721  
 Sum of electronic and thermal Enthalpies= -900.760777  
 Sum of electronic and thermal Free Energies= -900.823642

| E             | CV        | S         |
|---------------|-----------|-----------|
| KCal/Mol      | Cal/Mol-K | Cal/Mol-K |
| Total 109.260 | 54.776    | 132.310   |

C,0,1.21426707,-0.726423966,-0.0955206888  
 C,0,1.26064487,-0.702760051,-1.4892784935  
 C,0,2.2092316667,0.0797004851,-2.1391323275  
 C,0,3.1286393195,0.8480643269,-1.4157736072  
 C,0,3.071275743,0.8148563594,-0.0214792553  
 C,0,2.1231639982,0.0372475425,0.6388866032  
 C,0,4.1317225748,1.7172272004,-2.1263517625  
 H,0,0.4818346577,-1.3418124536,0.4157687981  
 H,0,0.5606723583,-1.2964194506,-2.0662700882  
 H,0,2.2416311426,0.0952615186,-3.2241409068  
 H,0,3.7649524372,1.4153522498,0.5572917973  
 H,0,2.0822399455,0.0431659828,1.7216118158  
 H,0,3.7142670727,2.7102133533,-2.3159088638  
 H,0,4.4151829309,1.2897311829,-3.0891246983  
 H,0,5.0336850175,1.8492571683,-1.5276222973  
 N,0,-0.0305975671,1.90986738,0.1553777345  
 O,0,0.4827824027,2.3029373936,-0.7431713327  
 O,0,-0.6352804286,1.536435739,1.004965505  
 F,0,1.8812408299,3.6705911835,3.6966840241  
 B,0,1.0356213523,2.9255694616,2.899053691  
 F,0,1.0646933237,1.5685836914,3.243322115  
 F,0,-0.2802332674,3.393399272,2.9572951358  
 F,0,1.4566257501,3.0259591303,1.5282075021

### Pi Complex NO<sub>2</sub>BF<sub>4</sub> PCM PURE-M06-2X 2.926\_826511

M062X/6-311G\*

E(RM062X) = -900.938742887

Zero-point correction= 0.158036 (Hartree/Particle)  
 Thermal correction to Energy= 0.173959  
 Thermal correction to Enthalpy= 0.174903  
 Thermal correction to Gibbs Free Energy= 0.112232  
 Sum of electronic and ZPE= -900.780707  
 Sum of electronic and thermal Energies= -900.764784  
 Sum of electronic and thermal Enthalpies= -900.763840  
 Sum of electronic and thermal Free Energies= -900.826511

| E             | CV        | S         |
|---------------|-----------|-----------|
| KCal/Mol      | Cal/Mol-K | Cal/Mol-K |
| Total 109.161 | 54.792    | 131.902   |

C,0,2.3465828886,-0.8227353157,1.1049569725  
 C,0,3.1080333345,-0.1788507984,0.1319045298  
 C,0,2.6714292673,1.0304251606,-0.4065786587  
 C,0,1.4759099615,1.6150869326,0.0176164275  
 C,0,0.727538684,0.9664709639,1.0048439972  
 C,0,1.1524246995,-0.2420025806,1.5421990156  
 C,0,0.9681914362,2.9003775937,-0.5758847503  
 H,0,2.6816833013,-1.7644696721,1.5263894756  
 H,0,4.0397778114,-0.6175826233,-0.2071728968  
 H,0,3.2641448862,1.5213316601,-1.1719327818  
 H,0,-0.2154625391,1.3922127201,1.3265798823  
 H,0,0.5465260592,-0.7376684062,2.2925143588  
 H,0,-0.0418832789,2.7558799036,-0.9653817083  
 H,0,1.609702886,3.2527915386,-1.3839633636  
 H,0,0.9169425699,3.6838553292,0.1840863153  
 N,0,0.4565728896,-1.7175072605,-0.9417182232  
 O,0,0.4878473059,-2.7328757618,-0.4951584937  
 O,0,0.4528326774,-0.7472223097,-1.4702841906  
 F,0,-1.5275539577,-1.3348756233,0.1433700296  
 B,0,-2.2936234414,-0.1235466319,0.0457149657  
 F,0,-2.3587358654,0.4601479337,1.3072964616  
 F,0,-1.6230819213,0.7194117908,-0.8555555084  
 F,0,-3.5585476546,-0.4347965433,-0.4294628561

### Pi Complex NO<sub>2</sub>BF<sub>4</sub> PCM PURE-M06-2X 2.957\_824442

M062X/6-311G\*

E(RM062X) = -900.938601018

Zero-point correction= 0.158570 (Hartree/Particle)  
 Thermal correction to Energy= 0.174297  
 Thermal correction to Enthalpy= 0.175241  
 Thermal correction to Gibbs Free Energy= 0.114159  
 Sum of electronic and ZPE= -900.780031  
 Sum of electronic and thermal Energies= -900.764304  
 Sum of electronic and thermal Enthalpies= -900.763360  
 Sum of electronic and thermal Free Energies= -900.824442

| E             | CV        | S         |
|---------------|-----------|-----------|
| KCal/Mol      | Cal/Mol-K | Cal/Mol-K |
| Total 109.373 | 54.649    | 128.558   |

C,0,-1.7332104415,2.2215669955,1.7371988918  
 C,0,-1.9456793581,2.7401531656,0.459893556  
 C,0,-2.6815965404,2.0140648168,-0.4706782204  
 C,0,-3.2214442682,0.7636644264,-0.1468238104  
 C,0,-2.999571735,0.2542956791,1.1331988998  
 C,0,-2.2619935202,0.9735679987,2.071184177  
 C,0,-4.0332531681,-0.0050096355,-1.1554114374  
 H,0,-1.1659757363,2.7868866532,2.4688614635  
 H,0,-1.5369436933,3.707703247,0.1909027504  
 H,0,-2.8376005375,2.4187969571,-1.4658914748  
 H,0,-3.3768886441,-0.7250101414,1.4038058866  
 H,0,-2.0915186865,0.5473753518,3.0529193376  
 H,0,-3.6702508092,0.1644768565,-2.1704269213  
 H,0,-5.0798020807,0.3102703726,-1.1238346407  
 H,0,-4.0049011742,-1.0760535288,-0.9518372656  
 N,0,0.2703393513,0.2515579558,0.8142582657  
 O,0,-0.2322195726,0.1449373469,-0.1665347023

O,0,0.8572848817,0.3908894159,1.74282759  
 F,0,-0.6471226207,-1.745894831,1.5003428805  
 B,0,-0.8903074543,-2.0193304843,2.8892827157  
 F,0,-0.2561243056,-1.0025762238,3.6216624029  
 F,0,-2.2639616279,-1.9871127871,3.1161835187  
 F,0,-0.3575426587,-3.2590656069,3.2032373369

### Pi Complex NO<sub>2</sub>BF<sub>4</sub> PCM PURE-M06-2X 2.962\_827214

M062X/6-311G\*

E(RM062X) = -900.939496146

Zero-point correction= 0.158066 (Hartree/Particle)  
 Thermal correction to Energy= 0.173974  
 Thermal correction to Enthalpy= 0.174918  
 Thermal correction to Gibbs Free Energy= 0.112282  
 Sum of electronic and ZPE= -900.781430  
 Sum of electronic and thermal Energies= -900.765522  
 Sum of electronic and thermal Enthalpies= -900.764578  
 Sum of electronic and thermal Free Energies= -900.827214

| E             | CV        | S         |
|---------------|-----------|-----------|
| KCal/Mol      | Cal/Mol-K | Cal/Mol-K |
| Total 109.170 | 54.792    | 131.830   |

C,0,-1.8926823304,0.7570944744,1.1929573165  
 C,0,-2.7680908276,0.8457076028,0.1119390401  
 C,0,-3.1916857089,-0.3101938274,-0.5441960334  
 C,0,-2.7562222099,-1.569017919,-0.128495171  
 C,0,-1.882753833,-1.6432517733,0.9633093712  
 C,0,-1.4511279966,-0.4957349726,1.6166809138  
 C,0,-3.1935898385,-2.8206258651,-0.8418134216  
 H,0,-1.554361627,1.6527109381,1.7014886451  
 H,0,-3.1275105592,1.8147681804,-0.2177435851  
 H,0,-3.8753788184,-0.2298902965,-1.3833087446  
 H,0,-1.5337892348,-2.6153808458,1.2975909819  
 H,0,-0.7580324296,-0.5719035915,2.4457155098  
 H,0,-2.3810434608,-3.222118406,-1.4533892842  
 H,0,-4.0429218754,-2.6273299602,-1.497625948  
 H,0,-3.4787434854,-3.5978480837,-0.1304217338  
 N,0,-0.0433470306,0.7682775097,-1.121074141  
 O,0,-0.0567797256,-0.3364495691,-1.1295905147  
 O,0,-0.068100253,1.8728341562,-1.1891064911  
 F,0,2.3539587381,0.7913606372,-1.0729514301  
 B,0,2.5436592718,0.8679907241,0.3381662503  
 F,0,3.248337448,-0.2352041298,0.7803639014  
 F,0,3.1713056378,2.0550775648,0.6651416024  
 F,0,1.2239071489,0.8529394522,0.8900399662

### Pi Complex NO<sub>2</sub>BF<sub>4</sub> PCM PURE-M06-2X 2.967\_827913

M062X/6-311G\*

E(RM062X) = -900.939513201

Zero-point correction= 0.157785 (Hartree/Particle)  
 Thermal correction to Energy= 0.173822  
 Thermal correction to Enthalpy= 0.174766  
 Thermal correction to Gibbs Free Energy= 0.111600

Sum of electronic and ZPE= -900.781729  
 Sum of electronic and thermal Energies= -900.765692  
 Sum of electronic and thermal Enthalpies= -900.764747  
 Sum of electronic and thermal Free Energies= -900.827913

| E             | CV        | S         |
|---------------|-----------|-----------|
| KCal/Mol      | Cal/Mol-K | Cal/Mol-K |
| Total 109.075 | 54.880    | 132.943   |

C,0,-0.8792678267,0.2885987742,2.1943375495  
 C,0,-1.1468714583,1.6567404249,2.2347131334  
 C,0,-2.4487010063,2.1155662079,2.0802236835  
 C,0,-3.5105355496,1.2254640016,1.8759978243  
 C,0,-3.2314433401,-0.140713614,1.8363109025  
 C,0,-1.9269387274,-0.6091886836,1.9984628894  
 C,0,-4.9122976405,1.7458905372,1.6995286597  
 H,0,0.1370560625,-0.0701426295,2.3106718577  
 H,0,-0.335669918,2.3619572484,2.3693692215  
 H,0,-2.6497120115,3.1821174072,2.1088829722  
 H,0,-4.0397213372,-0.8487920488,1.6844512864  
 H,0,-1.7311956866,-1.6760066585,1.9760346202  
 H,0,-5.2101669849,2.353750908,2.556714131  
 H,0,-5.6300853384,0.9323657418,1.5935532372  
 H,0,-4.9828455927,2.3801410941,0.8124915892  
 N,0,-1.1234190832,0.2156866337,-0.7620187453  
 O,0,-1.7940314777,1.0930294935,-0.7229100073  
 O,0,-0.5177779708,-0.7083369839,-0.8315125563  
 F,0,1.2217926894,3.2516081533,-1.6071426508  
 B,0,1.2349072458,1.876076445,-1.4784637652  
 F,0,0.7822014866,1.507864282,-0.1720175957  
 F,0,0.2902261793,1.2941732018,-2.3739870894  
 F,0,2.4890095864,1.3415470636,-1.7037910481

### Pi Complex NO<sub>2</sub>BF<sub>4</sub> PCM PURE-M06-2X 2.967\_828376

M062X/6-311G\*

E(RM062X) = -900.939491139

Zero-point correction= 0.157703 (Hartree/Particle)  
 Thermal correction to Energy= 0.173810  
 Thermal correction to Enthalpy= 0.174754  
 Thermal correction to Gibbs Free Energy= 0.111115  
 Sum of electronic and ZPE= -900.781788  
 Sum of electronic and thermal Energies= -900.765681  
 Sum of electronic and thermal Enthalpies= -900.764737  
 Sum of electronic and thermal Free Energies= -900.828376

| E             | CV        | S         |
|---------------|-----------|-----------|
| KCal/Mol      | Cal/Mol-K | Cal/Mol-K |
| Total 109.067 | 54.912    | 133.941   |

C,0,-1.4241206998,0.1096301571,-2.2712020279  
 C,0,-1.0048165116,1.3721750192,-1.8526333958  
 C,0,0.2526737636,1.5348210442,-1.2860170243  
 C,0,1.1175776022,0.4459655007,-1.1183688845  
 C,0,0.6880090287,-0.8122427259,-1.5403482096  
 C,0,-0.5713312395,-0.9816160605,-2.1171659408  
 C,0,2.4720536506,0.6432817799,-0.4911955469  
 H,0,-2.4069928887,-0.018464522,-2.7101740615  
 H,0,-1.6681642037,2.2226280071,-1.9533922653

H,0,0.5714111504,2.5195580755,-0.9582650008  
 H,0,1.3436141591,-1.6693811673,-1.4252870755  
 H,0,-0.8835735614,-1.966107039,-2.4491185101  
 H,0,3.0512661303,1.3845414275,-1.0461908295  
 H,0,3.0412306337,-0.2861096914,-0.4691277531  
 H,0,2.3763447295,1.0084563928,0.5342379816  
 N,0,-1.9833159585,-0.7659445061,0.5076497662  
 O,0,-1.2284795385,-0.0472299568,0.8745820575  
 O,0,-2.6899673085,-1.5481543459,0.1695174788  
 F,0,-3.6342052871,0.1170242244,2.009215534  
 B,0,-4.2386726053,1.0670471527,1.1340082195  
 F,0,-5.5599867215,0.7289830285,0.9124581186  
 F,0,-4.1045256447,2.3398498973,1.654570079  
 F,0,-3.503664079,0.964061608,-0.0887707093

### Pi Complex NO<sub>2</sub>BF<sub>4</sub> PCM PURE-M06-2X 2.976\_825066

M062X/6-311G\*  
 E(RM062X) = -900.938818196

Zero-point correction= 0.158520 (Hartree/Particle)  
 Thermal correction to Energy= 0.174296  
 Thermal correction to Enthalpy= 0.175240  
 Thermal correction to Gibbs Free Energy= 0.113752  
 Sum of electronic and ZPE= -900.780299  
 Sum of electronic and thermal Energies= -900.764522  
 Sum of electronic and thermal Enthalpies= -900.763578  
 Sum of electronic and thermal Free Energies= -900.825066

| E             | CV        | S         |
|---------------|-----------|-----------|
| KCal/Mol      | Cal/Mol-K | Cal/Mol-K |
| Total 109.372 | 54.648    | 129.412   |

C,0,2.5238069617,-6.4141808544,1.3577215451  
 C,0,1.6962834247,-6.4848772171,2.4787747398  
 C,0,0.520225852,-5.7433421622,2.5216030949  
 C,0,0.1458827331,-4.9191323061,1.4535879027  
 C,0,0.9756847229,-4.8644649354,0.3334056863  
 C,0,2.1553870472,-5.6029995549,0.2834140508  
 C,0,-1.0999876073,-4.0804744334,1.5324506919  
 H,0,3.4394014152,-6.9942024093,1.3162924931  
 H,0,1.9685614341,-7.1178836232,3.3157137712  
 H,0,-0.1167933331,-5.7979843899,3.3993969584  
 H,0,0.7155770226,-4.2129480716,-0.4926320423  
 H,0,2.7909962453,-5.5383002277,-0.5932196762  
 H,0,-1.3610209399,-3.6737698366,0.5554054914  
 H,0,-0.944761205,-3.2346281125,2.2060548368  
 H,0,-1.944150112,-4.6620087253,1.9085498917  
 N,0,3.4373351044,-3.6693987223,2.0550260238  
 O,0,4.4523873489,-3.8874744305,1.6625897454  
 O,0,2.4708179009,-3.4301088694,2.5340087553  
 F,0,1.1415242903,-2.0271274013,-1.18577113399  
 B,0,1.8283374655,-1.6596435684,-0.0331384829  
 F,0,1.0228633406,-1.8454272948,1.1002815907  
 F,0,2.9716246311,-2.5182264207,0.1175217433  
 F,0,2.2694758566,-0.3465780329,-0.1076227713

### Pi Complex NO<sub>2</sub>BF<sub>4</sub> PCM PURE-M06-2X 2.984\_825092

M062X/6-311G\*  
 E(RM062X) = -900.939279115

Zero-point correction= 0.158620 (Hartree/Particle)  
 Thermal correction to Energy= 0.174375  
 Thermal correction to Enthalpy= 0.175319  
 Thermal correction to Gibbs Free Energy= 0.114187  
 Sum of electronic and ZPE= -900.780659  
 Sum of electronic and thermal Energies= -900.764904  
 Sum of electronic and thermal Enthalpies= -900.763960  
 Sum of electronic and thermal Free Energies= -900.825092

| E             | CV        | S         |
|---------------|-----------|-----------|
| KCal/Mol      | Cal/Mol-K | Cal/Mol-K |
| Total 109.422 | 54.686    | 128.664   |

C,0,-2.8901881826,-3.0169865693,1.8699326549  
 C,0,-2.7571169167,-4.254218692,1.2405703078  
 C,0,-3.80237106,-5.1719597794,1.2811462844  
 C,0,-4.9993939706,-4.8789900628,1.9462353939  
 C,0,-5.1242104146,-3.6342251845,2.5651496127  
 C,0,-4.0809062162,-2.7112674118,2.5308420598  
 C,0,-6.1112403308,-5.8899349732,2.0158014315  
 H,0,-2.0836822001,-2.2929379454,1.8315914097  
 H,0,-1.8402237484,-4.5008492522,0.7170364045  
 H,0,-3.689445407,-6.1340393037,0.7902897787  
 H,0,-6.0346195812,-3.3989533078,3.1027172341  
 H,0,-4.2006255383,-1.7493524816,3.0186050979  
 H,0,-6.2542698578,-6.3858810736,1.0538394879  
 H,0,-7.0468727572,-5.4200434775,2.3174249237  
 H,0,-5.8763815435,-6.6482841608,2.7650900151  
 N,0,-2.7102223369,-4.1825991501,4.6105905198  
 O,0,-2.9380811335,-5.172162047,4.1757434619  
 O,0,-2.391925215,-3.2270987534,5.0769560989  
 F,0,-4.8008740545,-3.9268387966,5.5601490713  
 B,0,-5.76129263,-4.9927088939,5.6134630403  
 F,0,-6.0550257803,-5.2600736611,6.9426989179  
 F,0,-6.9018108293,-4.6059509529,4.9161662542  
 F,0,-5.1680344957,-6.1094124692,5.0060125388

### Pi Complex NO<sub>2</sub>BF<sub>4</sub> PCM PURE-M06-2X 2.984\_829231

M062X/6-311G\*  
 E(RM062X) = -900.939542391

Zero-point correction= 0.157751 (Hartree/Particle)  
 Thermal correction to Energy= 0.173888  
 Thermal correction to Enthalpy= 0.174832  
 Thermal correction to Gibbs Free Energy= 0.110311  
 Sum of electronic and ZPE= -900.781792  
 Sum of electronic and thermal Energies= -900.765654  
 Sum of electronic and thermal Enthalpies= -900.764710  
 Sum of electronic and thermal Free Energies= -900.829231

| E             | CV        | S         |
|---------------|-----------|-----------|
| KCal/Mol      | Cal/Mol-K | Cal/Mol-K |
| Total 109.117 | 54.866    | 135.796   |

C,0,0.626289451,1.1962856375,-3.3156390777  
 C,0,0.5934255513,2.39876298,-2.6096558874  
 C,0,1.6669726207,2.7652576813,-1.8016182993  
 C,0,2.7880884421,1.9425416678,-1.6824691954  
 C,0,2.809659495,0.7393438006,-2.3964331737  
 C,0,1.741343352,0.3656348343,-3.204834599  
 C,0,3.9305217623,2.3184795469,-0.777028883  
 H,0,-0.2042231634,0.9137837242,-3.9535866522  
 H,0,-0.2685358345,3.0526771638,-2.6848161973  
 H,0,1.6218712632,3.6940519806,-1.2436216481  
 H,0,3.6740275739,0.0876189583,-2.3146105908  
 H,0,1.778890838,-0.5689085696,-3.7530102919  
 H,0,3.8104288042,1.8508066652,0.2042999258  
 H,0,3.9760126032,3.3971850657,-0.6244875506  
 H,0,4.8858804402,1.9858879487,-1.1856481693  
 N,0,-0.4096416833,0.4528442336,-0.6183067978  
 O,0,-1.4404396754,0.5172019828,-1.0165762822  
 O,0,0.6198330307,0.3096332338,-0.2428274961  
 F,0,-0.5699255403,2.6346010746,0.3203308658  
 B,0,-1.05020931,2.2946081313,1.6243483478  
 F,0,-1.2032912586,0.8774763194,1.6038120265  
 F,0,-0.1118119884,2.6524666935,2.5736289484  
 F,0,-2.273237974,2.8978087457,1.8442933771

### Pi Complex NO<sub>2</sub>BF<sub>4</sub> PCM PURE-M06-2X 2.991\_828973

M062X/6-311G\*  
 E(RM062X) = -900.939538161

Zero-point correction= 0.157822 (Hartree/Particle)  
 Thermal correction to Energy= 0.173955  
 Thermal correction to Enthalpy= 0.174899  
 Thermal correction to Gibbs Free Energy= 0.110565  
 Sum of electronic and ZPE= -900.781716  
 Sum of electronic and thermal Energies= -900.765583  
 Sum of electronic and thermal Enthalpies= -900.764639  
 Sum of electronic and thermal Free Energies= -900.828973

| E             | CV        | S         |
|---------------|-----------|-----------|
| KCal/Mol      | Cal/Mol-K | Cal/Mol-K |
| Total 109.158 | 54.844    | 135.402   |

C,0,-2.2846922853,1.1676504653,1.4597929793  
 C,0,-3.2071065298,1.0801158566,0.4178057222  
 C,0,-3.3315187322,-0.1026557348,-0.304438115  
 C,0,-2.542085334,-1.2175740526,-0.0041628226  
 C,0,-1.6178945588,-1.115603827,1.0375597966  
 C,0,-1.4886051467,0.0635711221,1.7663635225  
 C,0,-2.695497793,-2.5021755474,-0.7739446432  
 H,0,-2.1902510708,2.0853062674,2.0303269711  
 H,0,-3.8283964112,1.933169079,0.1695889733  
 H,0,-4.0483741795,-0.1613116511,-1.1175009384  
 H,0,-0.9765774777,-1.9589170769,1.2693700754  
 H,0,-0.7604142065,0.1210112679,2.568044096  
 H,0,-3.0464581501,-2.3175729813,-1.7900783893  
 H,0,-3.4247876224,-3.1548547945,-0.2863085816  
 H,0,-1.7514842576,-3.0458046151,-0.8282431255  
 N,0,0.0551530432,1.3787157475,-0.3918199672  
 O,0,-0.4555257844,0.7470539884,-1.1409894742

O,0,0.5309927992,2.0763896264,0.3238003972  
 F,0,3.6144279388,-0.1603845663,0.2884250529  
 B,0,2.4583943733,-0.3696154309,-0.4386920086  
 F,0,2.1960225106,0.7584846628,-1.2704136915  
 F,0,2.5245952173,-1.515980863,-1.2077244366  
 F,0,1.3368856578,-0.4468449426,0.4457216071

### Pi Complex NO<sub>2</sub>BF<sub>4</sub> PCM PURE-M06-2X 2.998\_824734

M062X/6-311G\*  
 E(RM062X) = -900.939646282

Zero-point correction= 0.158749 (Hartree/Particle)  
 Thermal correction to Energy= 0.174358  
 Thermal correction to Enthalpy= 0.175302  
 Thermal correction to Gibbs Free Energy= 0.114912  
 Sum of electronic and ZPE= -900.780897  
 Sum of electronic and thermal Energies= -900.765289  
 Sum of electronic and thermal Enthalpies= -900.764345  
 Sum of electronic and thermal Free Energies= -900.824734

| E             | CV        | S         |
|---------------|-----------|-----------|
| KCal/Mol      | Cal/Mol-K | Cal/Mol-K |
| Total 109.411 | 54.607    | 127.100   |

C,0,-2.7949119261,0.1536749717,1.0268241998  
 C,0,-3.103787683,-0.6860289978,-0.0424756691  
 C,0,-2.1609325537,-1.5989240826,-0.5054846256  
 C,0,-0.8952631183,-1.6957306278,0.0849841299  
 C,0,-0.5979525781,-0.851783003,1.1561396532  
 C,0,-1.5370355233,0.0645596641,1.6254050006  
 C,0,0.1162133575,-2.6922976633,-0.4117102396  
 H,0,-3.5274286652,0.8629408147,1.3963824259  
 H,0,-4.0778697471,-0.6268238228,-0.515017582  
 H,0,-2.4067125156,-2.2445784846,-1.3433871982  
 H,0,0.3890964878,-0.8902796174,1.6013671663  
 H,0,-1.2840763898,0.7117779578,2.4588903124  
 H,0,-0.1580638181,-3.7031422278,-0.09742468  
 H,0,1.1071623841,-2.4599771321,-0.0243534884  
 H,0,0.1691580598,-2.6825642427,-1.5013170065  
 N,0,-0.875738979,1.8239753323,-0.5586945233  
 O,0,-0.8306816105,1.016334854,-1.311003952  
 O,0,-0.9612110625,2.6928317951,0.1262817594  
 F,0,2.4800958657,-0.4871251044,0.6479258368  
 B,0,2.1349783676,0.4525129325,-0.3220206157  
 F,0,1.2406037281,1.4129713577,0.2625103519  
 F,0,3.2579339311,1.1189257885,-0.7913214368  
 F,0,1.4469829884,-0.1614684118,-1.3769258186

### Pi Complex NO<sub>2</sub>BF<sub>4</sub> PCM PURE-M06-2X 2.998\_827902

M062X/6-311G\*  
 E(RM062X) = -900.939593532

Zero-point correction= 0.157986 (Hartree/Particle)  
 Thermal correction to Energy= 0.173954  
 Thermal correction to Enthalpy= 0.174898  
 Thermal correction to Gibbs Free Energy= 0.111692

Sum of electronic and ZPE= -900.781607  
 Sum of electronic and thermal Energies= -900.765640  
 Sum of electronic and thermal Enthalpies= -900.764696  
 Sum of electronic and thermal Free Energies= -900.827902

E CV S  
 KCal/Mol Cal/Mol-K Cal/Mol-K  
 Total 109.158 54.795 133.029

C,0,2.3261664919,-0.9977053086,1.595017216  
 C,0,3.2444286429,-0.9812171634,0.5477972822  
 C,0,3.3383611639,0.1354955373,-0.2797369141  
 C,0,2.5215274204,1.2511216323,-0.0797911474  
 C,0,1.6020708209,1.2214150805,0.972339393  
 C,0,1.5028101612,0.1109205167,1.8038890261  
 C,0,2.6178076033,2.4625112585,-0.9686721955  
 H,0,2.2553526054,-1.8615532617,2.2471142446  
 H,0,3.8890580107,-1.8357819975,0.3762228813  
 H,0,4.054360979,0.1378907195,-1.0954277856  
 H,0,0.9421699659,2.067758007,1.129851912  
 H,0,0.7790137125,0.1090790979,2.6117751989  
 H,0,1.6339528491,2.7478549236,-1.3470613564  
 H,0,3.2734997056,2.2813034779,-1.8205549311  
 H,0,3.0133681192,3.3163913301,-0.4131905752  
 N,0,-0.0083644577,-1.408784007,-0.2398906701  
 O,0,0.5101320735,-0.8596762658,-1.0466101566  
 O,0,-0.4901324663,-2.0275108325,0.5413585726  
 F,0,-2.1396536164,-0.9131001387,-1.2177617466  
 B,0,-2.4221162664,0.3007403282,-0.5251559888  
 F,0,-3.5907160766,0.1692976578,0.1996976503  
 F,0,-1.3173041004,0.4849316226,0.3648222102  
 F,0,-2.4772033416,1.3518667853,-1.4207781197

### Pi Complex NO<sub>2</sub>BF<sub>4</sub> PCM PURE-M06-2X 3.031\_827650

M062X/6-311G\*  
 E(RM062X) = -900.940071851

Zero-point correction= 0.157810 (Hartree/Particle)  
 Thermal correction to Energy= 0.173753  
 Thermal correction to Enthalpy= 0.174697  
 Thermal correction to Gibbs Free Energy= 0.112422  
 Sum of electronic and ZPE= -900.782262  
 Sum of electronic and thermal Energies= -900.766319  
 Sum of electronic and thermal Enthalpies= -900.765374  
 Sum of electronic and thermal Free Energies= -900.827650

E CV S  
 KCal/Mol Cal/Mol-K Cal/Mol-K  
 Total 109.032 54.908 131.070

C,0,-1.2602447427,-4.2644566936,4.3445311373  
 C,0,0.1191807165,-4.1870584545,4.523436848  
 C,0,0.7612771242,-5.074495212,5.383866743  
 C,0,0.0430272411,-6.0505538488,6.0803148381  
 C,0,-1.3382901057,-6.1247289793,5.8853550899  
 C,0,-1.9870172963,-5.2419207269,5.0284396252  
 C,0,0.7167432509,-6.9818674506,7.0510727303  
 H,0,-1.7642891456,-3.5781452984,3.6729599356  
 H,0,0.6943315449,-3.4346729332,3.9956351038

H,0,1.8348305328,-5.0017532459,5.5259619178  
 H,0,-1.9152261683,-6.8602989991,6.4348765878  
 H,0,-3.062275814,-5.3067486749,4.9041828578  
 H,0,0.2928102195,-6.846765433,8.0485511612  
 H,0,1.7906700585,-6.7997248067,7.1006309119  
 H,0,0.5598646137,-8.0244813516,6.7654837687  
 N,0,-1.8015710136,-3.1174914837,7.0974977846  
 O,0,-0.8473563916,-3.5745655043,7.415856094  
 O,0,-2.7268973815,-2.5973530413,6.7801903458  
 F,0,-1.582820535,-5.5932034539,9.169302588  
 B,0,-2.7989487169,-4.9082323384,9.1356944755  
 F,0,-3.7140421043,-5.4280556553,10.0233173648  
 F,0,-2.5535970884,-3.5325372344,9.4018910111  
 F,0,-3.2969258983,-4.9523805803,7.80480338

### Pi Complex NO<sub>2</sub>BF<sub>4</sub> PCM PURE-M06-2X 3.038\_828111

M062X/6-311G\*  
 E(RM062X) = -900.940076145

Zero-point correction= 0.157750 (Hartree/Particle)  
 Thermal correction to Energy= 0.173744  
 Thermal correction to Enthalpy= 0.174688  
 Thermal correction to Gibbs Free Energy= 0.111965  
 Sum of electronic and ZPE= -900.782326  
 Sum of electronic and thermal Energies= -900.766333  
 Sum of electronic and thermal Enthalpies= -900.765388  
 Sum of electronic and thermal Free Energies= -900.828111

E CV S  
 KCal/Mol Cal/Mol-K Cal/Mol-K  
 Total 109.026 54.928 132.011

C,0,0.9372398306,-1.03456312,-0.5894022203  
 C,0,1.2386193959,-0.5680595086,-1.8671814269  
 C,0,2.3263766526,0.2798268293,-2.0610878496  
 C,0,3.1292015332,0.6791036651,-0.9887213449  
 C,0,2.821910539,0.1984052392,0.2863835501  
 C,0,1.7373716814,-0.6488841243,0.4884776871  
 C,0,4.2785626724,1.6315206933,-1.1771217036  
 H,0,0.0934189002,-1.6977808305,-0.4339637168  
 H,0,0.6260702873,-0.8630472931,-2.7117152237  
 H,0,2.549648742,0.6467208431,-3.0578513949  
 H,0,3.419012409,0.5165154876,1.133776086  
 H,0,1.5090606607,-0.9993225469,1.4890217622  
 H,0,4.3823494028,1.9320494463,-2.2201014568  
 H,0,5.2188042381,1.1758575639,-0.8582020999  
 H,0,4.1237955058,2.5255886979,-0.5692686741  
 N,0,-0.0953387157,1.6852248563,0.2871516647  
 O,0,0.6178703987,2.1245665953,-0.4333924838  
 O,0,-0.8610735707,1.2593413502,0.9650968432  
 F,0,0.2796806817,3.7088333327,1.6248722465  
 B,0,1.5207210005,3.2240783036,2.1237034977  
 F,0,2.5005542576,3.4202607564,1.1479973726  
 F,0,1.8450227578,3.8307627176,3.3159977647  
 F,0,1.3384787389,1.8251080455,2.2948551205

### Pi Complex NO<sub>2</sub>BF<sub>4</sub> PCM PURE-M06-2X 3.045\_827735

M062X/6-311G\*

E(RM062X) = -900.940077246

Zero-point correction= 0.157833 (Hartree/Particle)  
 Thermal correction to Energy= 0.173791  
 Thermal correction to Enthalpy= 0.174736  
 Thermal correction to Gibbs Free Energy= 0.112342  
 Sum of electronic and ZPE= -900.782244  
 Sum of electronic and thermal Energies= -900.766286  
 Sum of electronic and thermal Enthalpies= -900.765342  
 Sum of electronic and thermal Free Energies= -900.827735

| E             | CV        | S         |
|---------------|-----------|-----------|
| KCal/Mol      | Cal/Mol-K | Cal/Mol-K |
| Total 109.056 | 54.909    | 131.318   |

C,0,2.9128898391,0.48379664,-0.5840324522  
 C,0,3.2071640834,-0.2621321151,0.5554947614  
 C,0,2.4593050375,-1.3974112637,0.8575998013  
 C,0,1.4071365515,-1.8078687061,0.0338873318  
 C,0,1.1267354132,-1.0563591505,-1.109703145  
 C,0,1.8686414884,0.0792132746,-1.4183339631  
 C,0,0.5633347991,-3.0064141792,0.3730157476  
 H,0,3.4955910893,1.3659459221,-0.8256164973  
 H,0,4.0173584262,0.0413043151,1.2089204388  
 H,0,2.6880378552,-1.9685095168,1.7517430709  
 H,0,0.2975911774,-1.3442809923,-1.7464203674  
 H,0,1.6259649551,0.6544530341,-2.3050354586  
 H,0,-0.4805097987,-2.7068034287,0.4884465879  
 H,0,0.8947819039,-3.4808562736,1.2971254829  
 H,0,0.604886307,-3.7501548982,-0.4260829307  
 N,0,0.3636959215,1.5944459669,0.6560394545  
 O,0,0.3102315514,0.6530444936,1.2319263813  
 O,0,0.4408169271,2.5691131708,0.1349877371  
 F,0,-1.9421347651,-0.6496399056,0.2378920759  
 B,0,-2.172463991,0.6113776041,-0.3144720273  
 F,0,-1.1022100971,0.9097232923,-1.2009200654  
 F,0,-3.3851389809,0.6837206155,-0.9612487511  
 F,0,-2.0870646935,1.5843261004,0.7216187863

### Pi Complex NO<sub>2</sub>BF<sub>4</sub> PCM PURE-M06-2X 3.082\_828846

M062X/6-311G\*

E(RM062X) = -900.938785019

Zero-point correction= 0.157858 (Hartree/Particle)  
 Thermal correction to Energy= 0.174061  
 Thermal correction to Enthalpy= 0.175005  
 Thermal correction to Gibbs Free Energy= 0.109939  
 Sum of electronic and ZPE= -900.780927  
 Sum of electronic and thermal Energies= -900.764724  
 Sum of electronic and thermal Enthalpies= -900.763780  
 Sum of electronic and thermal Free Energies= -900.828846

| E             | CV        | S         |
|---------------|-----------|-----------|
| KCal/Mol      | Cal/Mol-K | Cal/Mol-K |
| Total 109.225 | 54.856    | 136.942   |

C,0,1.3409027005,1.552797146,-1.0520858244  
 C,0,1.8091977332,1.8374741283,0.2295760222  
 C,0,2.8357901158,1.0803245579,0.7819690563  
 C,0,3.412892438,0.0192900195,0.0754096601  
 C,0,2.9332802289,-0.2600284394,-1.2060279567  
 C,0,1.9100167637,0.5036472433,-1.7696123857  
 C,0,4.5364265117,-0.7787426359,0.6816968552  
 H,0,0.5312544001,2.13161121,-1.4781459947  
 H,0,1.3666046753,2.6460735721,0.7998590625  
 H,0,3.1934108277,1.3078709992,1.7813684323  
 H,0,3.3662127218,-1.0781001374,-1.7733688517  
 H,0,1.5560081803,0.2753658958,-2.7696536449  
 H,0,4.3370093971,-1.0079116499,1.7300353251  
 H,0,5.4707146091,-0.2124937846,0.6440528147  
 H,0,4.6936130858,-1.7163336121,0.1479092798  
 N,0,-0.0321601093,-1.0903428283,-0.2612124699  
 O,0,0.4278772044,-0.8565045538,0.7158620969  
 O,0,-0.4350034912,-1.383175228,-1.2490525605  
 F,0,-2.1671837211,-1.2972614172,0.7470229202  
 B,0,-2.6391990552,0.0413360766,0.586338501  
 F,0,-1.5900287795,0.7329468481,-0.0972198282  
 F,0,-3.7839862318,0.0421990504,-0.1884343734  
 F,0,-2.8433322049,0.6173545392,1.8262228637

### Pi Complex NO<sub>2</sub>BF<sub>4</sub> PCM PURE-M06-2X 3.181\_825313

M062X/6-311G\*

E(RM062X) = -900.939838216

Zero-point correction= 0.158489 (Hartree/Particle)  
 Thermal correction to Energy= 0.174100  
 Thermal correction to Enthalpy= 0.175044  
 Thermal correction to Gibbs Free Energy= 0.114525  
 Sum of electronic and ZPE= -900.781349  
 Sum of electronic and thermal Energies= -900.765738  
 Sum of electronic and thermal Enthalpies= -900.764794  
 Sum of electronic and thermal Free Energies= -900.825313

| E             | CV        | S         |
|---------------|-----------|-----------|
| KCal/Mol      | Cal/Mol-K | Cal/Mol-K |
| Total 109.249 | 54.580    | 127.373   |

C,0,0.4280663924,-1.7326195446,-0.5014703286  
 C,0,-0.8768651758,-1.4904098778,-0.9386734265  
 C,0,-1.1829461102,-0.315576944,-1.6198432413  
 C,0,-0.1986183173,0.6452802881,-1.8712634458  
 C,0,1.1024849863,0.3906863156,-1.4339126823  
 C,0,1.4169129862,-0.7881233592,-0.7567074546  
 C,0,-0.5723088549,1.9248464361,-2.5682857944  
 H,0,0.6668482746,-2.6491723107,0.0256992781  
 H,0,-1.6610252878,-2.2163578079,-0.7496778096  
 H,0,-2.1991929879,-0.1309933478,-1.947410824  
 H,0,1.8802270878,1.1256013759,-1.6174440685  
 H,0,2.4344116711,-0.9641845782,-0.4259745228  
 H,0,-1.373606563,2.4228435778,-2.0193229524  
 H,0,-0.9507381629,1.7221328071,-3.5730983238  
 H,0,0.278383947,2.6016264599,-2.6528410799  
 N,0,-1.2248234453,0.2343076169,1.3737717494  
 O,0,-0.340178919,0.8650553916,1.1622240997

O,0,-2.0712799838,-0.4107536811,1.6788385917  
 F,0,-2.543628696,1.7438204997,0.2304453368  
 B,0,-3.7932030496,1.3180654787,-0.3385998047  
 F,0,-4.8269080586,1.978211481,0.3060972398  
 F,0,-3.778657898,1.6026297152,-1.7002811201  
 F,0,-3.8836951352,-0.0684010923,-0.129921616

### Pi Complex NO<sub>2</sub>BF<sub>4</sub> PCM PURE-M06-2X 3.187\_824934

M062X/6-311G\*

E(RM062X) = -900.939888477

Zero-point correction= 0.158650 (Hartree/Particle)  
 Thermal correction to Energy= 0.174211  
 Thermal correction to Enthalpy= 0.175155  
 Thermal correction to Gibbs Free Energy= 0.114954  
 Sum of electronic and ZPE= -900.781239  
 Sum of electronic and thermal Energies= -900.765678  
 Sum of electronic and thermal Enthalpies= -900.764734  
 Sum of electronic and thermal Free Energies= -900.824934

| E             | CV        | S         |
|---------------|-----------|-----------|
| KCal/Mol      | Cal/Mol-K | Cal/Mol-K |
| Total 109.319 | 54.545    | 126.703   |

C,0,2.7045212267,-0.1849626679,1.3212967143  
 C,0,3.2452063549,0.6317890523,0.3322788173  
 C,0,2.4370823851,1.551051905,-0.3349009785  
 C,0,1.0804629258,1.6773795667,-0.025004564  
 C,0,0.5501062507,0.8621069867,0.9779499425  
 C,0,1.3509756663,-0.0644010797,1.6427658722  
 C,0,0.1916809936,2.6552706487,-0.7448846336  
 H,0,3.3277888973,-0.904431011,1.839938336  
 H,0,4.294870174,0.5487346277,0.0734719138  
 H,0,2.8649497372,2.1727243806,-1.1155409891  
 H,0,-0.5025969604,0.9401679062,1.2229437791  
 H,0,0.9134970938,-0.6938475181,2.4108958226  
 H,0,0.562643117,2.8669841738,-1.7488461973  
 H,0,0.1428212655,3.6032470084,-0.2018296658  
 H,0,-0.8212801653,2.258325724,-0.8173257953  
 N,0,0.7294055613,-1.6788101951,-0.685250406  
 O,0,0.2201213226,-2.4027040557,-0.0203042457  
 O,0,1.2915579471,-1.0344423303,-1.3882901476  
 F,0,-3.3642110674,-1.1348018418,-0.775157018  
 B,0,-2.2770046382,-0.4758894384,-0.2245416541  
 F,0,-1.8250565007,-1.1400175776,0.9276679577  
 F,0,-1.1939042721,-0.4944690216,-1.167793754  
 F,0,-2.5838313147,0.8494277575,0.0719598935

### Pi Complex NO<sub>2</sub>BF<sub>4</sub> PCM PURE-M06-2X 3.188\_825412

M062X/6-311G\*

E(RM062X) = -900.939815265

Zero-point correction= 0.158459 (Hartree/Particle)  
 Thermal correction to Energy= 0.174067  
 Thermal correction to Enthalpy= 0.175011  
 Thermal correction to Gibbs Free Energy= 0.114403  
 Sum of electronic and ZPE= -900.781356

Sum of electronic and thermal Energies= -900.765748  
 Sum of electronic and thermal Enthalpies= -900.764804  
 Sum of electronic and thermal Free Energies= -900.825412

| E             | CV        | S         |
|---------------|-----------|-----------|
| KCal/Mol      | Cal/Mol-K | Cal/Mol-K |
| Total 109.229 | 54.568    | 127.561   |

C,0,-1.7898816071,-2.8902163023,-1.0844161286  
 C,0,-0.5995805204,-2.175573497,-1.0008772486  
 C,0,0.3456603445,-2.4998846375,-0.0269771826  
 C,0,0.1239174738,-3.5427106509,0.8740693341  
 C,0,-1.0707997664,-4.2629554471,0.7743780492  
 C,0,-2.0209992221,-3.9390190393,-0.1903220578  
 C,0,1.1117366064,-3.8850741552,1.9553850373  
 H,0,-2.5270012112,-2.6427349893,-1.839626743  
 H,0,-0.4048927542,-1.3612716155,-1.6898852617  
 H,0,1.2662635954,-1.9278653365,0.035549755  
 H,0,-1.2601737197,-5.0738742757,1.4679582795  
 H,0,-2.9427673681,-4.5091755559,-0.2439585396  
 H,0,0.6284618307,-3.8150230492,2.931443982  
 H,0,1.9764373761,-3.2210565072,1.9355367197  
 H,0,1.4654362899,-4.9131143963,1.8466786042  
 N,0,-2.7682530898,-1.947087017,1.7995704401  
 O,0,-1.8369482361,-1.3573833986,1.6975253889  
 O,0,-3.7504543013,-2.4507005432,1.885226629  
 F,0,-1.8118020739,-3.1130210107,3.5460317168  
 B,0,-2.2880495354,-4.4264073837,3.8834456185  
 F,0,-1.2183800543,-5.3137667293,3.8246162866  
 F,0,-2.8468509034,-4.3887171258,5.1501803492  
 F,0,-3.2568256535,-4.7666943367,2.9235255716

### Pi Complex NO<sub>2</sub>BF<sub>4</sub> PCM PURE-M06-2X 3.189\_824858

M062X/6-311G\*

E(RM062X) = -900.939899573

Zero-point correction= 0.158697 (Hartree/Particle)  
 Thermal correction to Energy= 0.174251  
 Thermal correction to Enthalpy= 0.175195  
 Thermal correction to Gibbs Free Energy= 0.115042  
 Sum of electronic and ZPE= -900.781203  
 Sum of electronic and thermal Energies= -900.765649  
 Sum of electronic and thermal Enthalpies= -900.764704  
 Sum of electronic and thermal Free Energies= -900.824858

| E             | CV        | S         |
|---------------|-----------|-----------|
| KCal/Mol      | Cal/Mol-K | Cal/Mol-K |
| Total 109.344 | 54.522    | 126.603   |

C,0,2.906949854,0.6761250119,0.6403598081  
 C,0,1.7026454713,0.4796855419,1.3194966808  
 C,0,0.8962586933,-0.6158625268,1.0185719656  
 C,0,1.2700919418,-1.5306947325,0.0306329341  
 C,0,2.4786470157,-1.3259171773,-0.6397507529  
 C,0,3.2930522267,-0.2351602865,-0.3384158064  
 C,0,0.374100766,-2.6965291438,-0.2894638802  
 H,0,3.5358723271,1.526749423,0.876832242  
 H,0,1.3869269029,1.1801544495,2.0858086727  
 H,0,-0.0428142126,-0.7536492233,1.5412832925

H,0,2.782727701,-2.0230945521,-1.4146394746  
 H,0,4.2256047884,-0.0946966779,-0.8735443063  
 H,0,0.5759408892,-3.5329238694,0.385620335  
 H,0,0.5281163425,-3.0494938184,-1.3101824577  
 H,0,-0.6712632255,-2.4122765814,-0.165273172  
 N,0,0.3280920719,1.6097963877,-0.9859398642  
 O,0,0.7785837929,0.9095046679,-1.715248253  
 O,0,-0.0897374992,2.3854794416,-0.3156547103  
 F,0,-1.6643419159,1.1209860658,1.2996211953  
 B,0,-2.2873367769,0.2286169927,0.4119907963  
 F,0,-2.3231970044,-1.0514091359,0.9600225204  
 F,0,-3.557585808,0.6720884578,0.0817930856  
 F,0,-1.4819583423,0.1928472853,-0.7770988508

### Pi Complex NO<sub>2</sub>BF<sub>4</sub> PCM PURE-M06-2X 3.189\_825651

M062X/6-311G\*  
 E(RM062X) = -900.939827037

Zero-point correction= 0.158396 (Hartree/Particle)  
 Thermal correction to Energy= 0.174055  
 Thermal correction to Enthalpy= 0.175000  
 Thermal correction to Gibbs Free Energy= 0.114176  
 Sum of electronic and ZPE= -900.781431  
 Sum of electronic and thermal Energies= -900.765772  
 Sum of electronic and thermal Enthalpies= -900.764827  
 Sum of electronic and thermal Free Energies= -900.825651

| E             | CV        | S         |
|---------------|-----------|-----------|
| KCal/Mol      | Cal/Mol-K | Cal/Mol-K |
| Total 109.221 | 54.598    | 128.015   |

C,0,-2.8322277737,-4.3493292628,-0.5116668038  
 C,0,-3.667235587,-4.1647892802,-1.608547912  
 C,0,-3.1498717338,-3.6768793048,-2.8091685598  
 C,0,-1.7942871648,-3.3700547127,-2.9379935606  
 C,0,-0.9608515209,-3.5695585454,-1.8326524329  
 C,0,-1.4725605128,-4.0494064043,-0.6301492958  
 C,0,-1.2200944782,-2.808793641,-4.2100228555  
 H,0,-3.2293098322,-4.7282120382,0.4230635203  
 H,0,-4.7238371009,-4.3958827201,-1.5320010745  
 H,0,-3.813341374,-3.5266122589,-3.6552643303  
 H,0,0.0932326566,-3.3321167277,-1.9143343704  
 H,0,-0.8065905302,-4.1902796844,0.2149749152  
 H,0,-0.468522359,-3.483813184,-4.6266906285  
 H,0,-0.7193007142,-1.8618319623,-4.0017449387  
 H,0,-1.9913164518,-2.648443811,-4.9639829312  
 N,0,-2.1493765293,-1.2432430388,-0.2697897675  
 O,0,-1.4674550503,-1.2249394669,0.6020611972  
 O,0,-2.9023659254,-1.2237631015,-1.0809568547  
 F,0,1.360184381,-1.4565717658,-2.6151181554  
 B,0,0.8405232884,-0.7731135942,-1.5200359247  
 F,0,0.9062529773,-1.5740107098,-0.3681894755  
 F,0,1.4951244501,0.4310238132,-1.3178006871  
 F,0,-0.5516799148,-0.5098549984,-1.7650949737

### Pi Complex NO<sub>2</sub>BF<sub>4</sub> PCM PURE-M06-2X 3.234\_824226

M062X/6-311G\*  
 E(RM062X) = -900.936710619

Zero-point correction= 0.158182 (Hartree/Particle)  
 Thermal correction to Energy= 0.174185  
 Thermal correction to Enthalpy= 0.175130  
 Thermal correction to Gibbs Free Energy= 0.112484  
 Sum of electronic and ZPE= -900.778528  
 Sum of electronic and thermal Energies= -900.762525  
 Sum of electronic and thermal Enthalpies= -900.761581  
 Sum of electronic and thermal Free Energies= -900.824226

| E             | CV        | S         |
|---------------|-----------|-----------|
| KCal/Mol      | Cal/Mol-K | Cal/Mol-K |
| Total 109.303 | 54.812    | 131.849   |

C,0,4.2454573101,-2.7180703235,-0.4866097869  
 C,0,4.350940463,-2.4569922,-1.8510129158  
 C,0,4.8477056999,-1.2364458466,-2.2970307528  
 C,0,5.2473744787,-0.2457346836,-1.3931916373  
 C,0,5.1336632167,-0.5153280291,-0.0280829248  
 C,0,4.6401325675,-1.7435286787,0.4235388461  
 C,0,5.7986406315,1.0660014965,-1.8883174114  
 H,0,3.8283549103,-3.6550953067,-0.1402010726  
 H,0,4.0258104032,-3.2024701189,-2.5672687481  
 H,0,4.9203473608,-1.0423806986,-3.3629625656  
 H,0,5.4423623343,0.2368249608,0.6920520287  
 H,0,4.5573182908,-1.9326088384,1.4886130777  
 H,0,6.7802341379,0.9214172881,-2.3461284374  
 H,0,5.9120200447,1.7826212543,-1.0741052179  
 H,0,5.1487012093,1.5073752087,-2.6467328101  
 N,0,2.1751754636,-0.2799855106,-0.0061144746  
 O,0,2.1156760675,-0.5746967332,-1.069072002  
 O,0,2.1949311974,0.105385034,1.0340969724  
 F,0,1.6935304338,-4.5235858425,0.2539199869  
 B,0,0.9802209843,-3.3697625154,-0.0572402315  
 F,0,1.2304063877,-2.9757363945,-1.3790082068  
 F,0,-0.3801442817,-3.5504583581,0.150160195  
 F,0,1.4344069886,-2.3036571639,0.7939556888

### Pi Complex NO<sub>2</sub>BF<sub>4</sub> PCM PURE-M06-2X 3.278\_828463

M062X/6-311G\*  
 E(RM062X) = -900.941417319

Zero-point correction= 0.158272 (Hartree/Particle)  
 Thermal correction to Energy= 0.174123  
 Thermal correction to Enthalpy= 0.175068  
 Thermal correction to Gibbs Free Energy= 0.112955  
 Sum of electronic and ZPE= -900.783145  
 Sum of electronic and thermal Energies= -900.767294  
 Sum of electronic and thermal Enthalpies= -900.766350  
 Sum of electronic and thermal Free Energies= -900.828463

| E             | CV        | S         |
|---------------|-----------|-----------|
| KCal/Mol      | Cal/Mol-K | Cal/Mol-K |
| Total 109.264 | 54.696    | 130.727   |



C,0,-1.1872823781,3.6315802963,0.8289433573  
 C,0,-1.6006933305,2.3358517309,1.1447693826  
 C,0,-0.6646129431,1.3129218045,1.2739732178  
 C,0,0.7008511922,1.5597493949,1.0922390447  
 C,0,1.1000279451,2.8617355832,0.7864226113  
 C,0,0.1676172991,3.8904714185,0.6532380911  
 C,0,1.6961892241,0.4364596811,1.1998545557  
 H,0,-1.9152522665,4.4286399419,0.7317288147  
 H,0,-2.6539625483,2.1249669462,1.2980413875  
 H,0,-0.9939258097,0.3057988156,1.5076985684  
 H,0,2.1545415802,3.0743897777,0.6423730293  
 H,0,0.5018077912,4.8929753016,0.4108045462  
 H,0,1.6058574083,-0.0723972405,2.1622800976  
 H,0,2.7190600725,0.8007326873,1.1015654659  
 H,0,1.5115000003,-0.3033614011,0.4180668548  
 N,0,-1.2826613721,1.5472679034,-1.6995791587  
 O,0,-2.3131839366,1.1443925852,-1.6707217138  
 O,0,-0.2846470534,2.017251015,-1.7596166233  
 F,0,-0.5543961358,-0.1634651169,-3.2286461017  
 B,0,-0.0534207317,-1.095951756,-2.2750697654  
 F,0,-0.4290811778,-0.5590085834,-1.0028610684  
 F,0,-0.6423373646,-2.3303996711,-2.4584461281  
 F,0,1.3267164353,-1.1571044144,-2.3525722657

### Pi Complex NO<sub>2</sub>BF<sub>4</sub> PCM PURE-M06-2X 3.281\_828248

M062X/6-311G\*  
 E(RM062X) = -900.941709578

Zero-point correction= 0.158256 (Hartree/Particle)  
 Thermal correction to Energy= 0.173992  
 Thermal correction to Enthalpy= 0.174936  
 Thermal correction to Gibbs Free Energy= 0.113462  
 Sum of electronic and ZPE= -900.783454  
 Sum of electronic and thermal Energies= -900.767718  
 Sum of electronic and thermal Enthalpies= -900.766774  
 Sum of electronic and thermal Free Energies= -900.828248

| E             | CV        | S         |
|---------------|-----------|-----------|
| KCal/Mol      | Cal/Mol-K | Cal/Mol-K |
| Total 109.182 | 54.666    | 129.384   |

C,0,-0.3566508889,0.2877816534,3.2797219507  
 C,0,-1.017303971,1.3231369554,2.6172649763  
 C,0,-1.5667873415,1.1106021483,1.3547470394  
 C,0,-1.4664735306,-0.1346730182,0.7269279174  
 C,0,-0.8169817951,-1.1663138205,1.4086650706  
 C,0,-0.2639025471,-0.9602889129,2.671484038  
 C,0,-1.9934855423,-0.3343767733,-0.6679978928  
 H,0,0.0676522092,0.4517344852,4.2634818719  
 H,0,-1.110486499,2.2961182632,3.0884265651  
 H,0,-2.0681344428,1.9238314407,0.8412216525  
 H,0,-0.7356536326,-2.1429671768,0.9418357425  
 H,0,0.2396478452,-1.7752132232,3.1792195977  
 H,0,-2.2342050084,-1.381459989,-0.8561158875  
 H,0,-1.2436935346,-0.0164637601,-1.397314509  
 H,0,-2.8890166106,0.2645419352,-0.8403278015  
 N,0,1.3752701838,1.7409685849,0.9023599153  
 O,0,1.3491740029,2.8121030462,1.1811729391

O,0,1.4561031021,0.6611383587,0.6832932984  
 F,0,-0.0757077989,2.1633850917,-0.9387803872  
 B,0,0.8923215701,2.1969346228,-1.9919230208  
 F,0,0.723382196,3.3343317993,-2.7551557187  
 F,0,2.153984686,2.2248122687,-1.3293813725  
 F,0,0.7822085992,1.0381631201,-2.744592885

### Pi Complex NO<sub>2</sub>BF<sub>4</sub> PCM PURE-M06-2X 3.293\_826543

M062X/6-311G\*  
 E(RM062X) = -900.938018478

Zero-point correction= 0.157623 (Hartree/Particle)  
 Thermal correction to Energy= 0.173649  
 Thermal correction to Enthalpy= 0.174593  
 Thermal correction to Gibbs Free Energy= 0.111476  
 Sum of electronic and ZPE= -900.780396  
 Sum of electronic and thermal Energies= -900.764369  
 Sum of electronic and thermal Enthalpies= -900.763425  
 Sum of electronic and thermal Free Energies= -900.826543

| E             | CV        | S         |
|---------------|-----------|-----------|
| KCal/Mol      | Cal/Mol-K | Cal/Mol-K |
| Total 108.966 | 54.877    | 132.842   |

C,0,-0.1282562982,-0.4948018958,4.1134327163  
 C,0,-0.2961572025,0.8846727328,4.0708531952  
 C,0,-1.5759675064,1.4382677229,4.0439683119  
 C,0,-2.7113003767,0.6272981097,4.0656482516  
 C,0,-2.5301524166,-0.7601887345,4.1125490878  
 C,0,-1.2519434244,-1.319208929,4.1364489789  
 C,0,-4.0946098501,1.2233621543,4.0696873062  
 H,0,0.8577187468,-0.9408960104,4.1012599901  
 H,0,0.5701917111,1.5362262784,4.0468962433  
 H,0,-1.6938814737,2.5165620313,4.0024138837  
 H,0,-3.4008906631,-1.4100955893,4.1377410211  
 H,0,-1.1280662067,-2.3955884728,4.1602352611  
 H,0,-4.0814796559,2.257268563,3.7228448625  
 H,0,-4.5113524577,1.2169647623,5.0801886737  
 H,0,-4.7760296997,0.6554060978,3.4335586669  
 N,0,-1.7525657384,-1.0170713715,1.2969635208  
 O,0,-2.2974158455,-1.9783353499,1.2297385898  
 O,0,-1.2726551872,-0.0195145598,1.287124108  
 F,0,-0.7875700467,-3.8557367788,2.1938555591  
 B,0,0.4944007611,-3.3134807342,2.0098285304  
 F,0,0.316800947,-2.0152952771,1.4195050296  
 F,0,1.1311253983,-3.1615932612,3.2383985913  
 F,0,1.243960185,-4.0982222882,1.1483676204

### Pi Complex NO<sub>2</sub>BF<sub>4</sub> PCM PURE-M06-2X 3.351\_828876

M062X/6-311G\*  
 E(RM062X) = -900.941679148

Zero-point correction= 0.158260 (Hartree/Particle)  
 Thermal correction to Energy= 0.174035  
 Thermal correction to Enthalpy= 0.174979  
 Thermal correction to Gibbs Free Energy= 0.112803  
 Sum of electronic and ZPE= -900.783419

Sum of electronic and thermal Energies= -900.767644  
 Sum of electronic and thermal Enthalpies= -900.766700  
 Sum of electronic and thermal Free Energies= -900.828876

E CV S  
 KCal/Mol Cal/Mol-K Cal/Mol-K  
 Total 109.208 54.679 130.861

C,0,-4.6720445495,-1.3561255034,0.0203870703  
 C,0,-4.0514805331,-0.9090785365,1.1856874949  
 C,0,-3.4466628142,0.348286831,1.2226614287  
 C,0,-3.4514351224,1.181294076,0.100604797  
 C,0,-4.0859034092,0.7224786301,-1.0574047248  
 C,0,-4.6893521908,-0.531051507,-1.1019237694  
 C,0,-2.762728993,2.5184614793,0.1098115952  
 H,0,-5.1454877372,-2.330613761,-0.0082514475  
 H,0,-4.0455125429,-1.5353432653,2.0717808001  
 H,0,-2.9605912596,0.6852607227,2.1325295772  
 H,0,-4.0987138151,1.3560014876,-1.9391606113  
 H,0,-5.1720449687,-0.864744547,-2.0135509607  
 H,0,-2.4899957302,2.8162328407,1.1220968222  
 H,0,-3.4029990503,3.2900238791,-0.3225837646  
 H,0,-1.8436234147,2.4677286801,-0.4779655286  
 N,0,-1.3218533119,-1.4187658636,0.069717911  
 O,0,-1.6459235674,-1.0374954521,-0.9156162625  
 O,0,-1.011872907,-1.8714129426,1.0309213704  
 F,0,0.2298573296,1.3796541435,-1.262637894  
 B,0,0.6373850368,0.7304334351,-0.1027873223  
 F,0,1.7248675624,1.3379779894,0.4833770313  
 F,0,-0.4649056507,0.6897131985,0.8035124478  
 F,0,0.9197456392,-0.6307580148,-0.4058130602

### Pi Complex NO<sub>2</sub>BF<sub>4</sub> PCM PURE-M06-2X 3.378\_823817

M062X/6-311G\*  
 E(RM062X) = -900.938779720

Zero-point correction= 0.158695 (Hartree/Particle)  
 Thermal correction to Energy= 0.174204  
 Thermal correction to Enthalpy= 0.175148  
 Thermal correction to Gibbs Free Energy= 0.114963  
 Sum of electronic and ZPE= -900.780085  
 Sum of electronic and thermal Energies= -900.764576  
 Sum of electronic and thermal Enthalpies= -900.763632  
 Sum of electronic and thermal Free Energies= -900.823817

E CV S  
 KCal/Mol Cal/Mol-K Cal/Mol-K  
 Total 109.315 54.548 126.670

C,0,-3.1766916697,0.405147725,-0.789498797  
 C,0,-2.037032545,0.3016477909,-1.5828908326  
 C,0,-1.0334735513,-0.6134374831,-1.2559575198  
 C,0,-1.1526020698,-1.4438623184,-0.1380408884  
 C,0,-2.2995758103,-1.3239059835,0.651823331  
 C,0,-3.3013630857,-0.4106118491,0.3331253321  
 C,0,-0.0873868727,-2.4541416438,0.1907296624  
 H,0,-3.9580387174,1.1122639684,-1.0427481569  
 H,0,-1.9279694011,0.9270131031,-2.4627620672  
 H,0,-0.1396293818,-0.6785748587,-1.8660883709

H,0,-2.4075644588,-1.9533989559,1.529878419  
 H,0,-4.1809483348,-0.3349826503,0.9627124025  
 H,0,0.1617213647,-2.4267892054,1.2521329649  
 H,0,0.8229710252,-2.2558962635,-0.3736149469  
 H,0,-0.4338908879,-3.4628099088,-0.049882836  
 N,0,-0.268253384,1.6874279109,0.3533189997  
 O,0,0.4268644823,2.023661483,-0.440905313  
 O,0,-0.9902187976,1.4521221152,1.1580293576  
 F,0,2.9879599237,1.2656209989,0.4947580692  
 B,0,2.3759347562,0.0179948248,0.3726966965  
 F,0,1.1556426582,0.0680538817,1.1316819179  
 F,0,2.0235910136,-0.2008502546,-0.967384807  
 F,0,3.172539744,-1.0024554269,0.853802383

### Pi Complex NO<sub>2</sub>BF<sub>4</sub> PCM PURE-M06-2X 3.379\_825489

M062X/6-311G\*  
 E(RM062X) = -900.938705281

Zero-point correction= 0.158235 (Hartree/Particle)  
 Thermal correction to Energy= 0.174004  
 Thermal correction to Enthalpy= 0.174948  
 Thermal correction to Gibbs Free Energy= 0.113216  
 Sum of electronic and ZPE= -900.780471  
 Sum of electronic and thermal Energies= -900.764702  
 Sum of electronic and thermal Enthalpies= -900.763758  
 Sum of electronic and thermal Free Energies= -900.825489

E CV S  
 KCal/Mol Cal/Mol-K Cal/Mol-K  
 Total 109.189 54.728 129.925

C,0,5.0359678023,-1.4192549029,-3.5178172376  
 C,0,5.5163269546,-0.2064617963,-3.0278772333  
 C,0,5.5411052512,0.0361996888,-1.6568274354  
 C,0,5.0883048008,-0.9212340681,-0.7444408747  
 C,0,4.6012885266,-2.1307734932,-1.2476470599  
 C,0,4.577052603,-2.3811579742,-2.6218724752  
 C,0,5.1434704099,-0.6668656478,0.7372949252  
 H,0,5.0207182965,-1.6123130039,-4.5841944042  
 H,0,5.8715229629,0.5530858533,-3.7154297582  
 H,0,5.9158313423,0.9858671958,-1.28717423  
 H,0,4.2296909006,-2.8775160651,-0.5551966665  
 H,0,4.2061641078,-3.332748548,-2.9879000488  
 H,0,4.5538543304,-1.4036484643,1.2814570403  
 H,0,4.7472508438,0.3201254518,0.9779599772  
 H,0,6.1763110135,-0.714116059,1.0925764109  
 N,0,2.0563904881,-0.9317489485,-1.9997373851  
 O,0,2.5276604311,0.0016387013,-2.3613136262  
 O,0,1.5191447449,-1.8599274986,-1.7219372119  
 F,0,2.2716177534,-0.2303421659,0.1656389745  
 B,0,1.7570064829,-1.168919609,1.1268052571  
 F,0,2.3420830975,-2.4135627568,0.8448695467  
 F,0,2.0835065409,-0.7409487248,2.3995503658  
 F,0,0.379534815,-1.2473267648,0.9347260495

### Pi Complex NO<sub>2</sub>BF<sub>4</sub> PCM PURE-M06-2X 3.423\_822985

M062X/6-311G\*

E(RM062X) = -900.937556839

Zero-point correction= 0.158613 (Hartree/Particle)  
 Thermal correction to Energy= 0.174294  
 Thermal correction to Enthalpy= 0.175238  
 Thermal correction to Gibbs Free Energy= 0.114572  
 Sum of electronic and ZPE= -900.778944  
 Sum of electronic and thermal Energies= -900.763263  
 Sum of electronic and thermal Enthalpies= -900.762319  
 Sum of electronic and thermal Free Energies= -900.822985

| E             | CV        | S         |
|---------------|-----------|-----------|
| KCal/Mol      | Cal/Mol-K | Cal/Mol-K |
| Total 109.371 | 54.626    | 127.683   |

C,0,0.4017946698,1.7110812507,0.3101736678  
 C,0,0.7281748427,0.7384032063,1.2502803114  
 C,0,1.9392528611,0.0551391118,1.15327642  
 C,0,2.844298533,0.3261514132,0.1184166259  
 C,0,2.502551002,1.3056606558,-0.8157280724  
 C,0,1.2949781459,1.9958026259,-0.7185245211  
 C,0,4.1617192961,-0.4007610354,0.0489542608  
 H,0,-0.557111968,2.2076028088,0.3666955866  
 H,0,0.0232963472,0.4946436756,2.0353369808  
 H,0,2.1897457521,-0.7022884386,1.8911795012  
 H,0,3.1877327573,1.5313803101,-1.6268665492  
 H,0,1.0458934397,2.7478851161,-1.4587308992  
 H,0,4.0552763778,-1.4458651468,0.3467256759  
 H,0,4.8868955108,0.0568906014,0.7269327344  
 H,0,4.582582051,-0.3702735109,-0.9567134437  
 N,0,0.4197669688,-1.5536495995,-0.7186796746  
 O,0,0.2071828859,-0.7291272943,-1.4222657297  
 O,0,0.6627458674,-2.4365707849,-0.0920823649  
 F,0,-2.3722881807,0.7533954637,1.286801276  
 B,0,-2.4414282147,-0.1864708741,0.2612929516  
 F,0,-2.0892801726,0.3946523026,-0.9643214095  
 F,0,-1.483566439,-1.2262722208,0.5270401398  
 F,0,-3.7037773337,-0.7562396369,0.1897185318

### Pi Complex NO<sub>2</sub>BF<sub>4</sub> PCM PURE-M06-2X 3.534\_823904

M062X/6-311G\*  
 E(RM062X) = -900.937909738

Zero-point correction= 0.158688 (Hartree/Particle)  
 Thermal correction to Energy= 0.174418  
 Thermal correction to Enthalpy= 0.175362  
 Thermal correction to Gibbs Free Energy= 0.114005  
 Sum of electronic and ZPE= -900.779222  
 Sum of electronic and thermal Energies= -900.763492  
 Sum of electronic and thermal Enthalpies= -900.762548  
 Sum of electronic and thermal Free Energies= -900.823904

| E             | CV        | S         |
|---------------|-----------|-----------|
| KCal/Mol      | Cal/Mol-K | Cal/Mol-K |
| Total 109.449 | 54.572    | 129.136   |

C,0,-0.1827941978,0.2710149976,4.1029893471  
 C,0,-0.5586636205,1.4778532671,3.5152248257  
 C,0,-1.7991906838,1.601067815,2.895548805

C,0,-2.6890395883,0.5243948776,2.8554795715  
 C,0,-2.2942166155,-0.6851518431,3.4422925836  
 C,0,-1.0528442145,-0.8143756347,4.0630405722  
 C,0,-4.0532673079,0.6682286928,2.2327242557  
 H,0,0.7870320144,0.174580425,4.5768642047  
 H,0,0.1177476268,2.325082974,3.5359859398  
 H,0,-2.0835087382,2.5448127762,2.4408573187  
 H,0,-2.9583561717,-1.5426129381,3.4066769306  
 H,0,-0.7653888027,-1.7675403734,4.4903206773  
 H,0,-4.7902878347,0.93437274,2.9949556785  
 H,0,-4.3861171335,-0.2648821686,1.7741758964  
 H,0,-4.0657504871,1.451787923,1.4739016776  
 N,0,-0.9710671392,-1.1700906807,0.9739511364  
 O,0,-1.7980523853,-1.8489011527,0.6863754483  
 O,0,-0.1434470013,-0.456901479,1.1533270096  
 F,0,-1.8354157599,-3.6100469986,2.6341818651  
 B,0,-0.4611318306,-3.8927924241,2.7176449467  
 F,0,0.2237135286,-2.8168810341,2.0593462666  
 F,0,-0.0561607853,-3.9328434937,4.0482510546  
 F,0,-0.1666673721,-5.0787564677,2.0633665884

### Pi Complex NO<sub>2</sub>BF<sub>4</sub> PCM PURE-M06-2X 3.645\_825367

M062X/6-311G\*  
 E(RM062X) = -900.939301383

Zero-point correction= 0.158242 (Hartree/Particle)  
 Thermal correction to Energy= 0.174002  
 Thermal correction to Enthalpy= 0.174946  
 Thermal correction to Gibbs Free Energy= 0.113935  
 Sum of electronic and ZPE= -900.781059  
 Sum of electronic and thermal Energies= -900.765299  
 Sum of electronic and thermal Enthalpies= -900.764355  
 Sum of electronic and thermal Free Energies= -900.825367

| E             | CV        | S         |
|---------------|-----------|-----------|
| KCal/Mol      | Cal/Mol-K | Cal/Mol-K |
| Total 109.188 | 54.800    | 128.409   |

C,0,-3.3774283996,-0.5490399188,0.7441193801  
 C,0,-2.4252231216,0.1666412721,1.4692105575  
 C,0,-1.5037190101,0.9743913772,0.8131193981  
 C,0,-1.5207855639,1.0880298281,-0.5825299331  
 C,0,-2.4796030763,0.361043599,-1.3001722189  
 C,0,-3.4026111038,-0.4504206569,-0.6440070119  
 C,0,-0.5421555025,1.9921391313,-1.2852106194  
 H,0,-4.0906115952,-1.1828845432,1.2583036371  
 H,0,-2.394347408,0.0853075844,2.549742893  
 H,0,-0.7437674509,1.5047551527,1.3751760737  
 H,0,-2.506176698,0.4410404415,-2.3829315661  
 H,0,-4.1376131209,-1.0036604171,-1.2174029247  
 H,0,-0.8661500535,3.0325949134,-1.1962779136  
 H,0,-0.4749433335,1.7601298805,-2.3497924395  
 H,0,0.4530968102,1.9228107284,-0.843724195  
 N,0,-0.1593801647,-1.4104047382,-0.7358147305  
 O,0,-0.7885982834,-1.9690477065,-0.0154037438  
 O,0,0.4839737901,-0.9527153849,-1.5140411295  
 F,0,2.3709172822,0.5031175326,-0.5214230599  
 B,0,2.1019300588,0.4198355529,0.8535514224  
 F,0,3.2363193042,0.0578088338,1.5598633814

F,0,1.5856287256,1.6316580191,1.3112346512  
 F,0,1.0993409148,-0.5941524813,1.0214040911

### Pi Complex NO<sub>2</sub>BF<sub>4</sub> PCM PURE-M06-2X 3.689\_828697

M062X/6-311G\*  
 E(RM062X) = -900.940818005

Zero-point correction= 0.157931 (Hartree/Particle)  
 Thermal correction to Energy= 0.173884  
 Thermal correction to Enthalpy= 0.174828  
 Thermal correction to Gibbs Free Energy= 0.112121  
 Sum of electronic and ZPE= -900.782887  
 Sum of electronic and thermal Energies= -900.766934  
 Sum of electronic and thermal Enthalpies= -900.765990  
 Sum of electronic and thermal Free Energies= -900.828697

| E             | CV        | S         |
|---------------|-----------|-----------|
| KCal/Mol      | Cal/Mol-K | Cal/Mol-K |
| Total 109.114 | 54.838    | 131.980   |

C,0,3.5239603318,-3.107381134,0.3385598937  
 C,0,3.9653116205,-1.9103904588,0.9035781095  
 C,0,3.9904230906,-1.7551489644,2.2834862183  
 C,0,3.5762385835,-2.7907196001,3.1301626937  
 C,0,3.1382031206,-3.9866461465,2.551613153  
 C,0,3.1114029379,-4.1461733514,1.1657555847  
 C,0,3.6135523984,-2.6070914127,4.6245992043  
 H,0,3.4990691624,-3.2247822722,-0.7385062341  
 H,0,4.2803130404,-1.0939786016,0.2637427592  
 H,0,4.3123727018,-0.8146983167,2.7171257173  
 H,0,2.8202134519,-4.8031985046,3.193394659  
 H,0,2.7677821861,-5.081041323,0.7377470512  
 H,0,4.6455987948,-2.5988104861,4.9834653318  
 H,0,3.089221161,-3.4122316009,5.1418438574  
 H,0,3.1596681271,-1.6553553988,4.9068638133  
 N,0,0.7704594187,-2.1939564854,2.617102198  
 O,0,0.9766599879,-1.8876404998,1.5750730053  
 O,0,0.507085039,-2.5530689592,3.6311810888  
 F,0,1.0617540931,1.2201335107,1.918341358  
 B,0,0.6847463688,0.6790951457,3.1373414844  
 F,0,0.4429634538,1.6421793567,4.0918148578  
 F,0,-0.4617262884,-0.1438631009,2.9505512321  
 F,0,1.7135333182,-0.2128960959,3.580349163

### Pi Complex NO<sub>2</sub>BF<sub>4</sub> PCM PURE-M06-2X 3.732\_828669

M062X/6-311G\*  
 E(RM062X) = -900.941337422

Zero-point correction= 0.158135 (Hartree/Particle)  
 Thermal correction to Energy= 0.174048  
 Thermal correction to Enthalpy= 0.174992  
 Thermal correction to Gibbs Free Energy= 0.112668  
 Sum of electronic and ZPE= -900.783203  
 Sum of electronic and thermal Energies= -900.767290  
 Sum of electronic and thermal Enthalpies= -900.766345  
 Sum of electronic and thermal Free Energies= -900.828669

| E             | CV        | S         |
|---------------|-----------|-----------|
| KCal/Mol      | Cal/Mol-K | Cal/Mol-K |
| Total 109.217 | 54.811    | 131.171   |

C,0,2.0296250026,3.3580986294,-0.9172365859  
 C,0,1.3634673117,3.2950016454,0.3020153471  
 C,0,1.6977269818,2.307794741,1.2291035816  
 C,0,2.6985276153,1.369627402,0.9523369127  
 C,0,3.3596808587,1.4471545694,-0.2789321807  
 C,0,3.03208978,2.4313120286,-1.2032250613  
 C,0,3.0705337203,0.3008328745,1.9467914117  
 H,0,1.7696024559,4.1211825851,-1.6416558061  
 H,0,0.5836269764,4.0113305191,0.5344648761  
 H,0,1.1774949453,2.2662640506,2.1817766363  
 H,0,4.1234821196,0.7141887153,-0.5149429536  
 H,0,3.5525170884,2.4724178105,-2.1533602293  
 H,0,4.0384913656,0.5233074247,2.4024788138  
 H,0,3.1532588356,-0.6705014774,1.4549682237  
 H,0,2.3361761969,0.2268594835,2.7506609317  
 N,0,0.3880880379,0.0730773907,-0.2550159791  
 O,0,0.4846511392,0.623010531,-1.2088380795  
 O,0,0.2145863121,-0.442721144,0.7094671887  
 F,0,2.0532083379,-2.5834674987,-2.6548032634  
 B,0,1.5610253326,-2.4204242908,-1.3754787311  
 F,0,0.1959900283,-2.0142984308,-1.4243862297  
 F,0,1.6852881721,-3.5672675835,-0.614976118  
 F,0,2.2448532861,-1.3402992757,-0.7266626054

### Nitrations of Toluene Including a Sulfuric Acid Molecule

The transition structures in this section were located in M06-2X/6-311G\*/PCM calculations with  $\epsilon=109$ .

### Toluene / NO<sub>2</sub><sup>+</sup> / H<sub>2</sub>SO<sub>4</sub> TS M06-2X/6-311G\*/PCM 3.45\_370364

m062x/6-311G\*  
 E(RM062X) = -1176.50893228

Zero-point correction= 0.182468 (Hartree/Particle)  
 Thermal correction to Energy= 0.198253  
 Thermal correction to Enthalpy= 0.199197  
 Thermal correction to Gibbs Free Energy= 0.138569  
 Sum of electronic and ZPE= -1176.326464  
 Sum of electronic and thermal Energies= -1176.310679  
 Sum of electronic and thermal Enthalpies= -1176.309735  
 Sum of electronic and thermal Free Energies= -1176.370364

| E             | CV        | S         |
|---------------|-----------|-----------|
| KCal/Mol      | Cal/Mol-K | Cal/Mol-K |
| Total 124.406 | 56.282    | 127.604   |

C,0,1.3698326556,0.0182068278,1.4911963992  
 C,0,2.5899498691,-1.3255273713,-0.6470028025  
 C,0,2.5940893992,0.4706352542,0.9465071895  
 C,0,0.7850171121,-1.1386896379,0.9525362602  
 C,0,3.2089348477,-0.2115676862,-0.1023284159  
 C,0,1.3770795171,-1.7899398491,-0.1128843569  
 C,0,0.7390432258,0.7231195096,2.6549407415

H,0,3.0407593302,-1.8429758482,-1.4853334544  
 H,0,3.0653574329,1.3518361486,1.3710279924  
 H,0,-0.1445732827,-1.5073785323,1.3724876921  
 H,0,4.1478659522,0.148454098,-0.5043464175  
 H,0,0.8992693438,-2.6610971288,-0.5449385977  
 N,0,0.7211368096,1.566735618,-0.3987408832  
 O,0,0.7166108908,0.906855788,-1.3075953998  
 O,0,0.5326120611,2.4831485281,0.2294796734  
 S,0,-2.4736213367,-0.2006640567,-0.2076509075  
 O,0,-1.6137190458,-1.004965783,-1.2627611712  
 O,0,-2.6152763146,-1.2079812018,1.0015424144  
 O,0,-3.7639241745,0.1036251227,-0.7479302073  
 O,0,-1.5879778941,0.8219883888,0.2705558856  
 H,0,-3.3619253283,-1.823071045,0.9167004716  
 H,0,-2.1352756725,-1.5760798946,-1.8497466355  
 H,0,0.9970519161,0.2022755461,3.5811898657  
 H,0,1.0977454939,1.749088853,2.7505217536  
 H,0,-0.348702808,0.7294223517,2.5667709102

### Toluene / NO<sub>2</sub>+ / H<sub>2</sub>SO<sub>4</sub> TS M06-2X/6-311G\*/PCM 3.42\_370300

m062x/6-311G\*  
 E(RM062X) = -1176.50889413

Zero-point correction= 0.182381 (Hartree/Particle)  
 Thermal correction to Energy= 0.198114  
 Thermal correction to Enthalpy= 0.199058  
 Thermal correction to Gibbs Free Energy= 0.138594  
 Sum of electronic and ZPE= -1176.326513  
 Sum of electronic and thermal Energies= -1176.310780  
 Sum of electronic and thermal Enthalpies= -1176.309836  
 Sum of electronic and thermal Free Energies= -1176.370300

| E             | CV        | S         |
|---------------|-----------|-----------|
| KCal/Mol      | Cal/Mol-K | Cal/Mol-K |
| Total 124.318 | 56.277    | 127.257   |

C,0,1.2896093973,-0.0464573232,1.45272334  
 C,0,2.6550744219,-1.3535333857,-0.625937531  
 C,0,2.499232734,0.4696367623,0.9287105508  
 C,0,0.786408799,-1.2356836003,0.9118388947  
 C,0,3.1923251081,-0.1989456589,-0.0817417674  
 C,0,1.4483104282,-1.8679490353,-0.1267989498  
 C,0,0.6069055638,0.6403404102,2.5973056112  
 H,0,3.1628907709,-1.8620530078,-1.4364668036  
 H,0,2.9076929475,1.3826906203,1.3516899088  
 H,0,-0.1348646109,-1.6511579069,1.3043400249  
 H,0,4.1246637266,0.2063122471,-0.4550082315  
 H,0,1.0313890275,-2.769715771,-0.5598021815  
 N,0,0.7331289131,1.47343085,-0.5546129554  
 O,0,0.6922168606,0.7363151395,-1.40072942  
 O,0,0.5760197374,2.4443930554,-0.0046960422  
 S,0,-2.5146102658,-0.1972536271,-0.027546193  
 O,0,-1.7738866623,-1.1599251811,-1.0394291764  
 O,0,-2.5734654388,-1.0379761449,1.3098029412  
 O,0,-3.8403722439,0.0830171506,-0.4894992455  
 O,0,-1.5650632966,0.8439824497,0.2392611957  
 H,0,-3.3429942107,-1.6269909727,1.3724551751  
 H,0,-2.3599207049,-1.7843090339,-1.4971480685  
 H,0,1.1304754874,0.40677344,3.5284774831

H,0,0.6310003855,1.7276022352,2.4871356241  
 H,0,-0.429244875,0.3183642884,2.6921748161

### Toluene / NO<sub>2</sub>+ / H<sub>2</sub>SO<sub>4</sub> TS M06-2X/6-311G\*/PCM 3.41\_370239

m062x/6-311G\*  
 E(RM062X) = -1176.50813056

Zero-point correction= 0.182483 (Hartree/Particle)  
 Thermal correction to Energy= 0.198280  
 Thermal correction to Enthalpy= 0.199224  
 Thermal correction to Gibbs Free Energy= 0.137891  
 Sum of electronic and ZPE= -1176.325648  
 Sum of electronic and thermal Energies= -1176.309851  
 Sum of electronic and thermal Enthalpies= -1176.308907  
 Sum of electronic and thermal Free Energies= -1176.370239

| E             | CV        | S         |
|---------------|-----------|-----------|
| KCal/Mol      | Cal/Mol-K | Cal/Mol-K |
| Total 124.422 | 56.198    | 129.085   |

C,0,1.3192603856,-0.0574419201,1.464644467  
 C,0,2.665139579,-1.3432928232,-0.6425476287  
 C,0,2.5160913703,0.4714784346,0.923054857  
 C,0,0.8191013379,-1.2488871114,0.9256319627  
 C,0,3.2023984729,-0.1898217369,-0.0986145123  
 C,0,1.4699306077,-1.8698081535,-0.126912706  
 C,0,0.647189778,0.6170336186,2.6221405683  
 H,0,3.1632125906,-1.8437464535,-1.4639492006  
 H,0,2.9258615469,1.3837004103,1.3463805772  
 H,0,-0.0856939709,-1.681977874,1.3384540709  
 H,0,4.1260767193,0.2248704597,-0.4826999663  
 H,0,1.0560534081,-2.7753207518,-0.5551313111  
 N,0,0.7784556459,1.4961839707,-0.5281052404  
 O,0,0.7100447106,0.7669805789,-1.3807276458  
 O,0,0.6330934374,2.4686636714,0.0243601844  
 S,0,-2.4126198876,-0.2152591959,0.1449491901  
 O,0,-1.8475892434,-1.0417161677,-1.0795586929  
 O,0,-2.6408870744,-1.0854888126,1.2616294104  
 O,0,-3.7822862796,0.3613850718,-0.38278063  
 O,0,-1.5376748886,0.9165451346,0.2455844139  
 H,0,-4.5407127391,-0.2251157614,-0.2295320171  
 H,0,-2.2165559644,-1.9364763584,-1.1621386398  
 H,0,1.181977764,0.3769430016,3.5452161407  
 H,0,0.6651695171,1.7050640689,2.5208113836  
 H,0,-0.3864828231,0.2896156993,2.7274249649

### Toluene / NO<sub>2</sub>+ / H<sub>2</sub>SO<sub>4</sub> TS M06-2X/6-311G\*/PCM 3.44\_370143

m062x/6-311G\*  
 E(RM062X) = -1176.50824968

Zero-point correction= 0.182460 (Hartree/Particle)  
 Thermal correction to Energy= 0.198238  
 Thermal correction to Enthalpy= 0.199182  
 Thermal correction to Gibbs Free Energy= 0.138107  
 Sum of electronic and ZPE= -1176.325789  
 Sum of electronic and thermal Energies= -1176.310012

Sum of electronic and thermal Enthalpies= -1176.309067  
Sum of electronic and thermal Free Energies= -1176.370143

E CV S  
KCal/Mol Cal/Mol-K Cal/Mol-K  
Total 124.396 56.166 128.544

C,0,1.3772607127,0.0120189635,1.5014506462  
C,0,2.5807194907,-1.340933762,-0.6419454989  
C,0,2.5600179472,0.5003584927,0.8986639033  
C,0,0.8268428595,-1.1860931251,1.0180598905  
C,0,3.1690577184,-0.187264205,-0.1512847688  
C,0,1.4087854916,-1.841583617,-0.0499525105  
C,0,0.7587134538,0.7222472444,2.6679510624  
H,0,3.0235529982,-1.8640071945,-1.4809596429  
H,0,3.0070587524,1.4128854535,1.281033254  
H,0,-0.0664511689,-1.5859199104,1.4867762148  
H,0,4.077588265,0.1999454197,-0.5955925424  
H,0,0.9589062347,-2.7482927333,-0.4368036722  
N,0,0.6320262879,1.487948704,-0.4076070606  
O,0,0.6085050705,0.8007559305,-1.2967766779  
O,0,0.4345264432,2.4217196343,0.1932109351  
S,0,-2.4386267361,-0.449940583,0.0520734533  
O,0,-1.7555697949,-1.0919547737,-1.2217763486  
O,0,-2.6772330264,-1.4590667182,1.0419713208  
O,0,-3.8080510151,0.111798337,-0.4922057014  
O,0,-1.64107296,0.7079999921,0.3376562814  
H,0,-4.5362867182,-0.5295685407,-0.4601985373  
H,0,-2.0587895924,-1.9917470298,-1.4259070134  
H,0,1.0605134407,0.2291791595,3.5961748331  
H,0,1.0873236107,1.7605823447,2.7305800184  
H,0,-0.3307677655,0.6929085168,2.6131811616

### Toluene / NO2+ / H2SO4 TS M06-2X/6-311G\*/PCM 3.46\_370093

m062x/6-311G\*  
E(RM062X) = -1176.50757660

Zero-point correction= 0.182598 (Hartree/Particle)  
Thermal correction to Energy= 0.198434  
Thermal correction to Enthalpy= 0.199379  
Thermal correction to Gibbs Free Energy= 0.137484  
Sum of electronic and ZPE= -1176.324979  
Sum of electronic and thermal Energies= -1176.309142  
Sum of electronic and thermal Enthalpies= -1176.308198  
Sum of electronic and thermal Free Energies= -1176.370093

E CV S  
KCal/Mol Cal/Mol-K Cal/Mol-K  
Total 124.520 56.117 130.268

C,0,1.3848620334,0.0290383966,1.5069950078  
C,0,2.5867102601,-1.3253173034,-0.6351977056  
C,0,2.6188747783,0.4609716968,0.9704829222  
C,0,0.7837427465,-1.1178298372,0.962173494  
C,0,3.2240994008,-0.2265681915,-0.0810832119  
C,0,1.3656815084,-1.7739399677,-0.1055320323  
C,0,0.7533351081,0.7422114696,2.6654340651  
H,0,3.0312379998,-1.8456719895,-1.4750707434  
H,0,3.105087154,1.3311453047,1.4004590576

H,0,-0.1487209234,-1.4762935517,1.3857014382  
H,0,4.1709409849,0.11811688,-0.4780310821  
H,0,0.87608982,-2.6369851287,-0.5405432009  
N,0,0.7646321665,1.6035632932,-0.3757379748  
O,0,0.7797579269,0.9560178475,-1.2931681569  
O,0,0.5655177477,2.506643153,0.2666164004  
S,0,-2.3306739583,-0.2437026587,-0.3217590812  
O,0,-1.7845358479,-1.1048442768,-1.3301453991  
O,0,-2.7641249993,-1.0915664957,0.9392309991  
O,0,-3.6780388901,0.4041512115,-0.8223708262  
O,0,-1.567567074,0.8453653336,0.2190395463  
H,0,-3.1334527834,-1.9631635245,0.7224083616  
H,0,-4.1858688527,-0.1565359382,-1.4309680176  
H,0,0.9346150909,0.1796474853,3.5852836517  
H,0,1.1718980744,1.7398650899,2.8040936088  
H,0,-0.3278114714,0.820673702,2.533065879

### Toluene / NO2+ / H2SO4 TS M06-2X/6-311G\*/PCM 3.43\_369922

m062x/6-311G\*  
E(RM062X) = -1176.50753881

Zero-point correction= 0.182345 (Hartree/Particle)  
Thermal correction to Energy= 0.198187  
Thermal correction to Enthalpy= 0.199131  
Thermal correction to Gibbs Free Energy= 0.137617  
Sum of electronic and ZPE= -1176.325193  
Sum of electronic and thermal Energies= -1176.309352  
Sum of electronic and thermal Enthalpies= -1176.308408  
Sum of electronic and thermal Free Energies= -1176.369922

E CV S  
KCal/Mol Cal/Mol-K Cal/Mol-K  
Total 124.364 56.256 129.468

C,0,1.2356313461,-2.0638017922,1.0980799472  
C,0,3.28809509,-0.8672120359,-0.3361021218  
C,0,1.4209414079,-0.6963756079,1.1910857181  
C,0,2.0906581285,-2.847513665,0.3064154189  
C,0,2.4366496239,-0.0643935603,0.4604456658  
C,0,3.1324573218,-2.2532553507,-0.3860338494  
H,0,0.4262129361,-2.5355760427,1.6425301782  
H,0,4.0939216986,-0.3925389455,-0.8878343759  
H,0,0.7788552522,-0.100995869,1.8302420737  
H,0,1.9341221421,-3.9175099001,0.2431636589  
C,0,2.6612747547,1.4135432414,0.5684120398  
H,0,3.8030696639,-2.8496606407,-0.9920507362  
N,0,1.3674431689,-0.283383964,-1.8523078481  
O,0,0.7192059899,-1.1962028107,-1.7527515249  
O,0,1.7627546045,0.6692987718,-2.3073577681  
S,0,-1.4387591055,0.9826602834,0.1832064153  
O,0,-1.8812427779,-0.3223801846,0.5789578596  
O,0,-0.9502828136,1.7933386948,1.450922699  
O,0,-2.6504183125,1.8303333467,-0.3644387819  
O,0,-0.3875159307,1.1592020706,-0.7767175808  
H,0,-3.5019860867,1.6121687968,0.0486700994  
H,0,-1.4708944577,1.6278268674,2.2538183258  
H,0,3.4335710916,1.6107289721,1.3173436136  
H,0,3.0175585126,1.8379129998,-0.3730433382  
H,0,1.7513867512,1.9312283244,0.871590212

**Toluene / NO2+ / H2SO4 TS M06-2X/6-311G\*/PCM 3.46\_369483**

m062x/6-311G\*  
E(RM062X) = -1176.50823352

Zero-point correction= 0.182931 (Hartree/Particle)  
Thermal correction to Energy= 0.198567  
Thermal correction to Enthalpy= 0.199511  
Thermal correction to Gibbs Free Energy= 0.138751  
Sum of electronic and ZPE= -1176.325303  
Sum of electronic and thermal Energies= -1176.309666  
Sum of electronic and thermal Enthalpies= -1176.308722  
Sum of electronic and thermal Free Energies= -1176.369483

| E             | CV        | S         |
|---------------|-----------|-----------|
| KCal/Mol      | Cal/Mol-K | Cal/Mol-K |
| Total 124.603 | 56.035    | 127.881   |

C,0,-0.2180113637,-0.1126305268,0.1802629739  
C,0,0.3424060906,0.3065852992,2.8883152504  
C,0,1.1164260489,-0.0452716501,0.6383155167  
C,0,-1.2637689474,0.0857346119,1.1068190417  
C,0,1.3911183545,0.1622877867,1.981841526  
C,0,-0.9860071472,0.2816401352,2.4467414479  
C,0,-0.523012904,-0.2797282672,-1.2776102735  
H,0,0.5559327187,0.4479907321,3.9412499018  
H,0,1.9259258497,-0.1668930112,-0.0739010462  
H,0,-2.2902194855,0.0719895234,0.7565812467  
H,0,2.4170451447,0.1949099367,2.3272358604  
H,0,-1.7960646639,0.4140849958,3.1542404267  
N,0,-0.0508388814,-2.4795270392,0.8678731912  
O,0,0.0939673567,-2.4907770615,1.9830529681  
O,0,-0.1789248807,-2.9045203753,-0.1693899789  
S,0,-3.3627752532,-2.4236822665,2.3141267481  
O,0,-2.4169375421,-2.612282905,3.5682324851  
O,0,-4.0247686248,-1.1535562514,2.3886856836  
O,0,-4.414012081,-3.5911866857,2.450365735  
O,0,-2.5415107099,-2.7810905869,1.1930591711  
H,0,-5.190925217,-3.3591328703,2.9846338586  
H,0,-2.7657760184,-2.2331677475,4.3914090888  
H,0,-0.6658188957,0.704403524,-1.7326805234  
H,0,0.2927110129,-0.7725277751,-1.8079532678  
H,0,-1.4446129607,-0.8448025253,-1.430524032

**Toluene / NO2+ / H2SO4 TS M06-2X/6-311G\*/PCM 3.46\_369466**

m062x/6-311G\*  
E(RM062X) = -1176.50823358

Zero-point correction= 0.182934 (Hartree/Particle)  
Thermal correction to Energy= 0.198569  
Thermal correction to Enthalpy= 0.199513  
Thermal correction to Gibbs Free Energy= 0.138768  
Sum of electronic and ZPE= -1176.325300  
Sum of electronic and thermal Energies= -1176.309665  
Sum of electronic and thermal Enthalpies= -1176.308721  
Sum of electronic and thermal Free Energies= -1176.369466

| E             | CV        | S         |
|---------------|-----------|-----------|
| KCal/Mol      | Cal/Mol-K | Cal/Mol-K |
| Total 124.604 | 56.034    | 127.849   |

C,0,1.1223484806,-1.4486463115,1.1981616853  
C,0,3.3522312733,-1.0312245389,-0.4300078128  
C,0,1.6854665978,-0.1883762866,1.1235312701  
C,0,1.6664662364,-2.502005332,0.4534159251  
C,0,2.793472644,0.0522640414,0.2833623755  
C,0,2.7908594794,-2.2965513705,-0.3439892793  
H,0,0.2597581439,-1.6200186513,1.8313047162  
H,0,4.2227688108,-0.8594496239,-1.0545007027  
H,0,1.2733930678,0.6307732153,1.7028799772  
H,0,1.2148361598,-3.485694278,0.5048555919  
C,0,3.4274977546,1.4096648036,0.2406655957  
H,0,3.2150460949,-3.1179067984,-0.9081951792  
N,0,1.2861131834,0.2102248444,-1.6674738973  
O,0,0.678113685,-0.7354951924,-1.693394278  
O,0,1.6380124012,1.2306737396,-1.9957905964  
S,0,-1.587938157,0.8027673121,0.4426646838  
O,0,-1.8850446015,-0.6147955595,-0.1938826122  
O,0,-1.4003494101,0.6723935427,1.8585899124  
O,0,-2.8928848116,1.6360961444,0.1436636017  
O,0,-0.5752077512,1.3665879583,-0.403201941  
H,0,-3.5782235284,1.5500657725,0.8261545267  
H,0,-2.4164259186,-1.2012505984,0.3689124387  
H,0,2.6813353016,2.2018387017,0.3286367614  
H,0,4.1145477064,1.5150093666,1.0849764295  
H,0,4.0036611574,1.5587610989,-0.6732961922

**Toluene / NO2+ / H2SO4 TS M06-2X/6-311G\*/PCM 3.41\_369431**

m062x/6-311G\*  
E(RM062X) = -1176.50796125

Zero-point correction= 0.182600 (Hartree/Particle)  
Thermal correction to Energy= 0.198286  
Thermal correction to Enthalpy= 0.199230  
Thermal correction to Gibbs Free Energy= 0.138530  
Sum of electronic and ZPE= -1176.325362  
Sum of electronic and thermal Energies= -1176.309676  
Sum of electronic and thermal Enthalpies= -1176.308731  
Sum of electronic and thermal Free Energies= -1176.369431

| E             | CV        | S         |
|---------------|-----------|-----------|
| KCal/Mol      | Cal/Mol-K | Cal/Mol-K |
| Total 124.426 | 56.076    | 127.753   |

C,0,1.6935849268,-0.0488377843,1.3751181221  
C,0,2.3071921671,-1.3308718179,-1.0494263994  
C,0,3.0325735634,-0.3260155166,1.0077240719  
C,0,0.6723333934,-0.4283545046,0.4960903578  
C,0,3.3325300127,-0.9922094361,-0.1823472755  
C,0,0.9770263366,-1.0447141656,-0.7063265994  
C,0,1.3887835579,0.5887865398,2.6981685075  
H,0,2.5270620281,-1.8199232042,-1.9906857426  
H,0,3.8330557271,-0.0551175613,1.6900546743  
H,0,-0.3589216442,-0.2249526291,0.7605862834  
H,0,4.3629481289,-1.2129973849,-0.4318441065

H,0,0.1790369257,-1.3144784519,-1.388109288  
 N,0,2.6299180279,1.9145798219,-0.03810725  
 O,0,2.2972111521,1.6371619076,-1.073687291  
 O,0,3.0180334575,2.5652739116,0.7963834255  
 S,0,-0.9785961719,2.8782676368,1.0805579929  
 O,0,-1.7571749663,1.7309211821,1.4311784093  
 O,0,-0.89843469,3.7446742479,2.3987109964  
 O,0,-1.7620540179,3.8008368484,0.0674283074  
 O,0,0.3313182402,2.7453395257,0.5071568683  
 H,0,-2.7087394423,3.8836992547,0.2679892228  
 H,0,-0.3063524559,4.5112020053,2.3274826336  
 H,0,1.8606438514,1.5721744021,2.7918164698  
 H,0,0.3150281117,0.708149629,2.8402293785  
 H,0,1.7803067802,-0.0251214561,3.512126231

### Toluene / NO<sub>2</sub>+ / H<sub>2</sub>SO<sub>4</sub> TS M06-2X/6-311G\*/PCM 2.46\_368778

m062x/6-311G\*  
 E(RM062X) = -1176.50700707

Zero-point correction= 0.182525 (Hartree/Particle)  
 Thermal correction to Energy= 0.198277  
 Thermal correction to Enthalpy= 0.199221  
 Thermal correction to Gibbs Free Energy= 0.138229  
 Sum of electronic and ZPE= -1176.324482  
 Sum of electronic and thermal Energies= -1176.308730  
 Sum of electronic and thermal Enthalpies= -1176.307786  
 Sum of electronic and thermal Free Energies= -1176.368778

| E             | CV        | S         |
|---------------|-----------|-----------|
| KCal/Mol      | Cal/Mol-K | Cal/Mol-K |
| Total 124.421 | 56.105    | 128.370   |

C,0,1.3946979783,-0.0557317179,1.4106703258  
 C,0,2.5965104742,-1.3471213873,-0.7668013543  
 C,0,2.7012776845,0.2622481542,1.0434316612  
 C,0,0.7174835086,-1.073308511,0.7045850326  
 C,0,3.2983369615,-0.360627795,-0.0446633928  
 C,0,1.3151493467,-1.7319461181,-0.3520101919  
 C,0,0.7040874993,0.6785930168,2.5193367303  
 H,0,3.0756464489,-1.8490913124,-1.5997397348  
 H,0,3.2475641528,1.0144773191,1.6019276877  
 H,0,-0.2917084246,-1.3369431089,1.0031503886  
 H,0,4.3042575434,-0.0887561973,-0.3445837785  
 H,0,0.7874051077,-2.5155296604,-0.8815680512  
 N,0,1.8749467474,0.6908139326,-1.9502585436  
 O,0,0.9915638252,1.0290934874,-1.3422776891  
 O,0,2.5873814247,0.6680569707,-2.8243024294  
 S,0,2.7605797852,3.5474474246,0.042068451  
 O,0,1.5746869327,3.2612473783,0.7894117996  
 O,0,3.930781786,3.5640422298,1.1046720636  
 O,0,2.7409294207,5.0240329851,-0.51329426  
 O,0,3.1385779666,2.7368793158,-1.0842639486  
 H,0,2.3892413696,5.6729105098,0.11798914  
 H,0,4.815303293,3.6462366356,0.7115308755  
 H,0,1.4169547004,1.216941569,3.1432532544  
 H,0,0.0127237386,1.4128390861,2.0962990254  
 H,0,0.1253637288,-0.0046472067,3.1429129384

### Toluene / NO<sub>2</sub>+ / H<sub>2</sub>SO<sub>4</sub> TS M06-2X/6-311G\*/PCM 2.46\_368547

m062x/6-311G\*  
 E(RM062X) = -1176.50468519

Zero-point correction= 0.181786 (Hartree/Particle)  
 Thermal correction to Energy= 0.197922  
 Thermal correction to Enthalpy= 0.198867  
 Thermal correction to Gibbs Free Energy= 0.136138  
 Sum of electronic and ZPE= -1176.322899  
 Sum of electronic and thermal Energies= -1176.306763  
 Sum of electronic and thermal Enthalpies= -1176.305819  
 Sum of electronic and thermal Free Energies= -1176.368547

| E             | CV        | S         |
|---------------|-----------|-----------|
| KCal/Mol      | Cal/Mol-K | Cal/Mol-K |
| Total 124.198 | 56.454    | 132.023   |

C,0,1.2677255647,-0.2738113823,1.1842970915  
 C,0,3.3604761659,-1.1187237732,-0.4852835656  
 C,0,2.4883613582,0.433587296,1.1438574021  
 C,0,1.117005835,-1.4337782834,0.4174886517  
 C,0,3.5283672382,-0.0015637461,0.3237503146  
 C,0,2.1397461266,-1.8300640224,-0.4200544269  
 H,0,0.4717936477,0.048598038,1.846312348  
 C,0,4.4389908761,-1.588171053,-1.4157146455  
 H,0,2.6190970015,1.3113739766,1.767095726  
 H,0,0.1954082149,-1.9998656946,0.4680226282  
 H,0,4.4617046005,0.54891241,0.3022518279  
 H,0,2.0156950593,-2.7096314183,-1.0433804186  
 N,0,0.9721990184,1.4067789076,-0.5897857242  
 O,0,1.2662112358,0.8318816188,-1.5125912917  
 O,0,0.5323986874,2.2765095201,-0.0168767976  
 S,0,-2.3363193718,-0.187245601,0.1195295487  
 O,0,-3.1224700733,-1.2060879069,-0.7948549798  
 O,0,-1.9855159743,-0.8142940557,1.3620710599  
 O,0,-3.3764328134,0.9731326461,0.3758106407  
 O,0,-1.3382781929,0.3848391195,-0.7348653401  
 H,0,-3.9922167858,0.7945459141,1.1050597592  
 H,0,-3.6628099414,-1.8419513464,-0.2989843191  
 H,0,4.7042051127,-2.6254043464,-1.1984645768  
 H,0,4.0895756932,-1.554575751,-2.4505349132  
 H,0,5.3352407023,-0.975150066,-1.3330769994

### Toluene / NO<sub>2</sub>+ / H<sub>2</sub>SO<sub>4</sub> TS M06-2X/6-311G\*/PCM 3.45\_368434

m062x/6-311G\*  
 E(RM062X) = -1176.50729410

Zero-point correction= 0.182563 (Hartree/Particle)  
 Thermal correction to Energy= 0.198250  
 Thermal correction to Enthalpy= 0.199194  
 Thermal correction to Gibbs Free Energy= 0.138860  
 Sum of electronic and ZPE= -1176.324731  
 Sum of electronic and thermal Energies= -1176.309044  
 Sum of electronic and thermal Enthalpies= -1176.308100  
 Sum of electronic and thermal Free Energies= -1176.368434

| E | CV | S |
|---|----|---|
|---|----|---|



KCal/Mol Cal/Mol-K Cal/Mol-K  
Total 124.404 56.087 126.985

C,0,1.3100653065,-0.0525074452,1.4020342769  
C,0,2.750095371,-1.2779419147,-0.6710712871  
C,0,2.5649921709,0.4509845922,0.9856086631  
C,0,0.8106838299,-1.2042044967,0.7724871446  
C,0,3.2892139805,-0.1750267281,-0.0283800861  
C,0,1.5096854864,-1.7953101939,-0.2628001386  
C,0,0.565635967,0.584895985,2.536424248  
H,0,3.2867425216,-1.7495844079,-1.4853465359  
H,0,2.9735896278,1.3242889725,1.4846598671  
H,0,-0.1291553263,-1.6282787846,1.1095092169  
H,0,4.2508217575,0.2218291509,-0.3294233621  
H,0,1.101241392,-2.6665396163,-0.7613046679  
N,0,0.8228566282,1.5748990957,-0.4767126438  
O,0,0.9268161118,0.9635723329,-1.4140399804  
O,0,0.5442398906,2.4578814559,0.1666575797  
S,0,-2.467121347,-0.3016936189,0.0147883296  
O,0,-2.0677696494,-1.503190713,-0.9323465655  
O,0,-2.6289233234,-0.8767920607,1.3104927842  
O,0,-3.9097884639,0.1075937761,-0.4722429497  
O,0,-1.5620863099,0.7983580926,-0.2069334373  
H,0,-3.9155642702,0.7284046269,-1.2190875323  
H,0,-1.7419664325,-1.2361028878,-1.8073600897  
H,0,0.8600079755,0.1098692429,3.4766020966  
H,0,0.7987612757,1.6472455136,2.6283190562  
H,0,-0.5122121704,0.4610820309,2.4231120137

### Toluene / NO<sub>2</sub>+ / H<sub>2</sub>SO<sub>4</sub> TS M06-2X/6-311G\*/PCM 2.45\_368346

m062x/6-311G\*  
E(RM062X) = -1176.50607699

Zero-point correction= 0.182224 (Hartree/Particle)  
Thermal correction to Energy= 0.198085  
Thermal correction to Enthalpy= 0.199029  
Thermal correction to Gibbs Free Energy= 0.137731  
Sum of electronic and ZPE= -1176.323853  
Sum of electronic and thermal Energies= -1176.307992  
Sum of electronic and thermal Enthalpies= -1176.307048  
Sum of electronic and thermal Free Energies= -1176.368346

E CV S  
KCal/Mol Cal/Mol-K Cal/Mol-K  
Total 124.300 56.231 129.012

C,0,1.2951943995,-0.4934208794,1.3829299282  
C,0,3.1982355277,-1.2049080253,-0.5411415225  
C,0,2.6099500371,0.0061859866,1.4654221616  
C,0,0.9585112498,-1.410473959,0.3765303891  
C,0,3.5484368367,-0.3521059492,0.5093468865  
C,0,1.8955192641,-1.7406820081,-0.5820501736  
H,0,0.5633492242,-0.2226839373,2.1345611248  
C,0,4.1788235132,-1.5400680491,-1.6249973408  
H,0,2.8775470183,0.677800256,2.273178504  
H,0,-0.0356893642,-1.8397851307,0.3445010875  
H,0,4.5554579218,0.045490518,0.5644607902  
H,0,1.6319179568,-2.4213739795,-1.3844616387  
N,0,0.9888057256,1.4647454521,-0.0574557741

O,0,1.4882848939,1.1818888097,-1.0230037291  
O,0,0.4007470691,2.1030531493,0.6634276309  
S,0,-2.2983802868,0.0875322091,-0.3112001854  
O,0,-2.4071564182,-1.4614062512,-0.6003856389  
O,0,-1.8009167758,0.1441111727,1.1925477233  
O,0,-3.5843261383,0.7041431221,-0.4297248773  
O,0,-1.1630333909,0.5268684789,-1.0693149528  
H,0,-2.5119310556,0.1239172018,1.8531946275  
H,0,-3.2504928699,-1.8544101805,-0.3222362388  
H,0,3.9678276614,-0.9383741554,-2.5141856442  
H,0,5.2032440839,-1.3351756744,-1.3158345241  
H,0,4.0985689166,-2.5884161774,-1.9162286134

### Toluene / NO<sub>2</sub>+ / H<sub>2</sub>SO<sub>4</sub> TS M06-2X/6-311G\*/PCM 2.44\_368221

m062x/6-311G\*  
E(RM062X) = -1176.50532400

Zero-point correction= 0.182100 (Hartree/Particle)  
Thermal correction to Energy= 0.198138  
Thermal correction to Enthalpy= 0.199083  
Thermal correction to Gibbs Free Energy= 0.137103  
Sum of electronic and ZPE= -1176.323224  
Sum of electronic and thermal Energies= -1176.307186  
Sum of electronic and thermal Enthalpies= -1176.306241  
Sum of electronic and thermal Free Energies= -1176.368221

E CV S  
KCal/Mol Cal/Mol-K Cal/Mol-K  
Total 124.334 56.382 130.447

C,0,1.2042125192,-0.1373309213,1.4380541965  
C,0,2.7287361883,-1.0708580895,-0.7161641512  
C,0,2.4202322414,0.4722254201,1.1258366128  
C,0,0.7891810188,-1.2589440339,0.6901726644  
C,0,3.1744399643,0.0263039244,0.0492876823  
C,0,1.5524052058,-1.7426040163,-0.3536017168  
C,0,0.3355392341,0.3944457811,2.538067218  
H,0,3.3353887364,-1.4371144579,-1.5363768167  
H,0,2.7704354133,1.3059993972,1.7231395369  
H,0,-0.14610799,-1.7448121896,0.9468186123  
H,0,4.1070835091,0.5182036409,-0.2050004504  
H,0,1.2290966048,-2.6097319546,-0.9162493125  
N,0,1.593874083,0.7054541483,-1.9449699837  
O,0,0.6607965344,0.8875092435,-1.3441673016  
O,0,2.2947685133,0.7931075924,-2.8247902306  
S,0,2.8695312951,3.6943825003,-0.0377849025  
O,0,1.7513820532,3.6801233498,1.0812707905  
O,0,4.0696991897,3.2889757421,0.6183467704  
O,0,3.0487633572,5.2241942852,-0.3779655467  
O,0,2.3771971457,3.0068427027,-1.2049979325  
H,0,2.4129314165,5.5620379462,-1.0294884127  
H,0,0.8437700641,3.7439112097,0.7423338876  
H,0,-0.5215210551,0.9226790057,2.1095955364  
H,0,-0.0582282917,-0.4158976999,3.1538932737  
H,0,0.8792520491,1.0924794735,3.1736119761

**Toluene / NO2+ / H2SO4 TS M06-2X/6-311G\*/PCM 3.42\_368199**

m062x/6-311G\*  
E(RM062X) = -1176.50519050

Zero-point correction= 0.182050 (Hartree/Particle)  
Thermal correction to Energy= 0.198019  
Thermal correction to Enthalpy= 0.198963  
Thermal correction to Gibbs Free Energy= 0.136991  
Sum of electronic and ZPE= -1176.323141  
Sum of electronic and thermal Energies= -1176.307172  
Sum of electronic and thermal Enthalpies= -1176.306228  
Sum of electronic and thermal Free Energies= -1176.368199

| E             | CV        | S         |
|---------------|-----------|-----------|
| KCal/Mol      | Cal/Mol-K | Cal/Mol-K |
| Total 124.259 | 56.397    | 130.430   |

C,0,1.1922289591,-0.6843599428,1.4325987854  
C,0,3.2683159534,-1.215575417,-0.373339391  
C,0,2.1282355489,0.3036827796,1.1181572445  
C,0,1.2647407505,-1.9140191107,0.8025061283  
C,0,3.1936467409,0.0491930522,0.2247052759  
C,0,2.3060141876,-2.1749843787,-0.1036672  
H,0,0.401122122,-0.468774656,2.1397801341  
H,0,4.0750544431,-1.4328258682,-1.0643051275  
H,0,2.0617369677,1.276648808,1.5955903046  
H,0,0.5225380192,-2.6765968944,1.0067336745  
C,0,4.2409875695,1.0969708745,-0.0172981801  
H,0,2.3585684744,-3.140612582,-0.5924572876  
N,0,1.1582276499,0.9092461963,-1.1253243353  
O,0,0.751211123,-0.0665269275,-1.5019250919  
O,0,1.339245627,2.0200285593,-1.0758366194  
S,0,-2.0448105084,0.1474984983,0.1858626066  
O,0,-1.9792681624,-0.9616770381,-0.7218497451  
O,0,-2.1273652885,-0.3803154106,1.6733427557  
O,0,-3.3978062496,0.9350589946,-0.0086351873  
O,0,-1.0209514659,1.1527428217,0.2035444459  
H,0,-4.1435285451,0.3754802117,-0.2796086387  
H,0,-2.6339664001,-1.2034289961,1.7716118579  
H,0,5.0199448872,1.0150896562,0.7458144794  
H,0,4.7117652646,0.9769012527,-0.9927123072  
H,0,3.8277363322,2.1050575171,0.0576774181

**Toluene / NO2+ / H2SO4 TS M06-2X/6-311G\*/PCM 2.43\_368154**

m062x/6-311G\*  
E(RM062X) = -1176.50633068

Zero-point correction= 0.182762 (Hartree/Particle)  
Thermal correction to Energy= 0.198529  
Thermal correction to Enthalpy= 0.199473  
Thermal correction to Gibbs Free Energy= 0.138177  
Sum of electronic and ZPE= -1176.323569  
Sum of electronic and thermal Energies= -1176.307802  
Sum of electronic and thermal Enthalpies= -1176.306858  
Sum of electronic and thermal Free Energies= -1176.368154

| E | CV | S |
|---|----|---|
|---|----|---|

| KCal/Mol      | Cal/Mol-K | Cal/Mol-K |
|---------------|-----------|-----------|
| Total 124.579 | 55.947    | 129.009   |

C,0,1.3246840153,-0.1352029004,1.4953650177  
C,0,2.7387165081,-1.0877992152,-0.7213613676  
C,0,2.5749911437,0.4040532847,1.1742321529  
C,0,0.8246241528,-1.2073294265,0.7306843306  
C,0,3.2784047467,-0.0565658818,0.0736997951  
C,0,1.5303607644,-1.6987837113,-0.3494601539  
C,0,0.5142014072,0.4348373339,2.6193409495  
H,0,3.3002178138,-1.4644494736,-1.5684310657  
H,0,2.9893381254,1.197662279,1.7857120253  
H,0,-0.1309079015,-1.6454159618,0.9978578913  
H,0,4.2375842458,0.3770324031,-0.186302691  
H,0,1.1423531694,-2.5256480754,-0.9318095255  
N,0,1.6109814073,0.7242692583,-1.8835224669  
O,0,0.7820540325,1.0274151658,-1.1863087195  
O,0,2.2144220707,0.720685632,-2.8370980506  
S,0,2.8798789688,3.6392533307,-0.0613472209  
O,0,1.465497718,3.4261103154,0.6170718576  
O,0,3.9205152914,3.4293813308,0.9028126657  
O,0,2.8610203596,5.1498406006,-0.5160395003  
O,0,2.8120768667,2.8768114962,-1.2735618684  
H,0,3.1598447812,5.7698803074,0.1691935635  
H,0,1.4128337856,3.7343396761,1.5361553777  
H,0,1.1422638731,0.9665545483,3.3340602336  
H,0,-0.2136279072,1.1476622161,2.2184250196  
H,0,-0.0436724388,-0.3429225323,3.1419597503

**Toluene / NO2+ / H2SO4 TS M06-2X/6-311G\*/PCM 2.50\_368101**

m062x/6-311G\*  
E(RM062X) = -1176.50660328

Zero-point correction= 0.182466 (Hartree/Particle)  
Thermal correction to Energy= 0.198227  
Thermal correction to Enthalpy= 0.199172  
Thermal correction to Gibbs Free Energy= 0.138502  
Sum of electronic and ZPE= -1176.324137  
Sum of electronic and thermal Energies= -1176.308376  
Sum of electronic and thermal Enthalpies= -1176.307432  
Sum of electronic and thermal Free Energies= -1176.368101

| E             | CV        | S         |
|---------------|-----------|-----------|
| KCal/Mol      | Cal/Mol-K | Cal/Mol-K |
| Total 124.390 | 56.181    | 127.690   |

C,0,1.4209347188,0.027249842,1.2521282174  
C,0,3.0262519673,-1.36915888,-0.5691194524  
C,0,2.6038563894,0.6119188228,0.7794803448  
C,0,1.0829131423,-1.2839034426,0.8603522568  
C,0,3.3761007297,-0.0702123026,-0.1383551524  
C,0,1.8927441855,-1.9750320821,-0.032393294  
H,0,0.7989240191,0.5530904252,1.9675038121  
C,0,3.8634756162,-2.0621224218,-1.6012695572  
H,0,2.8853912069,1.6050399858,1.1068862189  
H,0,0.1850583869,-1.7473977008,1.2533437037  
H,0,4.2699108996,0.3931738169,-0.5426270469  
H,0,1.6296267319,-2.9852808747,-0.3268759235  
N,0,0.0901106523,0.4669185759,-0.7539128971

O,0,0.8450712369,0.3953138682,-1.585149786  
 O,0,-0.9054714714,0.7097092376,-0.2794289196  
 S,0,-0.4892130776,-2.7512885288,-2.4542642478  
 O,0,0.7972221178,-2.1500227322,-3.1541983162  
 O,0,-0.2113353839,-4.0710991247,-1.9679701109  
 O,0,-1.5553383865,-2.8149490439,-3.6158626925  
 O,0,-0.9374959126,-1.7067351569,-1.5804414722  
 H,0,-1.5518338991,-3.6512432253,-4.1091053942  
 H,0,1.2976807333,-2.7869651871,-3.6898807178  
 H,0,3.6021907941,-3.1164867523,-1.6874335088  
 H,0,3.7136105982,-1.5907655766,-2.5769216432  
 H,0,4.9252420049,-1.9793425419,-1.3622174206

### Toluene / NO<sub>2</sub>+ / H<sub>2</sub>SO<sub>4</sub> TS M06-2X/6-311G\*/PCM 2.45\_367948

m062x/6-311G\*

E(RM062X) = -1176.50450469

Zero-point correction= 0.181829 (Hartree/Particle)  
 Thermal correction to Energy= 0.197883  
 Thermal correction to Enthalpy= 0.198827  
 Thermal correction to Gibbs Free Energy= 0.136557  
 Sum of electronic and ZPE= -1176.322676  
 Sum of electronic and thermal Energies= -1176.306622  
 Sum of electronic and thermal Enthalpies= -1176.305677  
 Sum of electronic and thermal Free Energies= -1176.367948

| E             | CV        | S         |
|---------------|-----------|-----------|
| KCal/Mol      | Cal/Mol-K | Cal/Mol-K |
| Total 124.174 | 56.404    | 131.059   |

C,0,1.3059363286,-0.1845987137,1.2828123849  
 C,0,3.2403817907,-1.1472512183,-0.5051910293  
 C,0,2.5830201518,0.4123182838,1.2161040466  
 C,0,1.0276354223,-1.3108393375,0.4982773232  
 C,0,3.5420096615,-0.0804244969,0.3365534623  
 C,0,1.9721283953,-1.7623325136,-0.4000588001  
 H,0,0.5663730354,0.1856507649,1.9843286106  
 C,0,4.2268661504,-1.6439763368,-1.5189879854  
 H,0,2.8138385954,1.2547861082,1.8586412284  
 H,0,0.0710170548,-1.8115147797,0.5875058612  
 H,0,4.5187713069,0.3866420195,0.2884584116  
 H,0,1.746508587,-2.6099756172,-1.0386802733  
 N,0,1.0441910742,1.5360102161,-0.4363517726  
 O,0,1.3451001538,1.009261321,-1.3855528605  
 O,0,0.6161424385,2.3839001207,0.1774183934  
 S,0,-2.2277599982,-0.1199904913,0.0266513479  
 O,0,-2.3729455343,-1.5781025794,-0.5661562289  
 O,0,-2.0098306692,-0.296494823,1.4263063841  
 O,0,-3.669956717,0.497998984,-0.1203601364  
 O,0,-1.3025234289,0.625676073,-0.7892432105  
 H,0,-3.8461096418,0.8897702495,-0.9910061353  
 H,0,-2.290924138,-1.6240978982,-1.532433674  
 H,0,4.2864787025,-2.7336684765,-1.5033891241  
 H,0,3.9076552916,-1.3513951521,-2.5234578006  
 H,0,5.2207559867,-1.2336097063,-1.3452494228

### Toluene / NO<sub>2</sub>+ / H<sub>2</sub>SO<sub>4</sub> TS M06-2X/6-311G\*/PCM 3.47\_367776

m062x/6-311G\*

E(RM062X) = -1176.50698426

Zero-point correction= 0.182836 (Hartree/Particle)  
 Thermal correction to Energy= 0.198424  
 Thermal correction to Enthalpy= 0.199368  
 Thermal correction to Gibbs Free Energy= 0.139208  
 Sum of electronic and ZPE= -1176.324148  
 Sum of electronic and thermal Energies= -1176.308560  
 Sum of electronic and thermal Enthalpies= -1176.307616  
 Sum of electronic and thermal Free Energies= -1176.367776

| E             | CV        | S         |
|---------------|-----------|-----------|
| KCal/Mol      | Cal/Mol-K | Cal/Mol-K |
| Total 124.513 | 56.060    | 126.617   |

C,0,-0.182898926,-0.093589264,0.1478782505  
 C,0,0.3931473862,0.2838510685,2.8589777528  
 C,0,1.1478579764,0.0823607856,0.5803498537  
 C,0,-1.2206688668,-0.0319894324,1.1034318987  
 C,0,1.4311847568,0.2623727671,1.9233062794  
 C,0,-0.9334493371,0.1517590681,2.4463386853  
 C,0,-0.503760729,-0.2381763031,-1.3093700668  
 H,0,0.6209526686,0.4102731504,3.9108282444  
 H,0,1.9489981806,0.0598309068,-0.1505886161  
 H,0,-2.2495395575,-0.1348760167,0.7757316867  
 H,0,2.4574912449,0.3745899585,2.2506634849  
 H,0,-1.7383809235,0.1824714693,3.1713306469  
 N,0,0.0222179876,-2.4833145884,0.7946158865  
 O,0,0.3511905142,-2.4997587352,1.8688177482  
 O,0,-0.2504508322,-2.8879587663,-0.221365092  
 S,0,-3.3678951491,-2.5495558824,2.4578000436  
 O,0,-2.7945882768,-2.7314956473,3.9192193287  
 O,0,-3.9283543994,-1.2380123837,2.4290685618  
 O,0,-4.5867089034,-3.5493208857,2.3958316638  
 O,0,-2.3714612,-2.9656659796,1.5022934272  
 H,0,-4.3415388109,-4.458593101,2.1588037408  
 H,0,-2.2317110873,-3.5147562033,4.0307173711  
 H,0,-0.6830539458,0.7506004181,-1.7408684724  
 H,0,0.3195290266,-0.6941680564,-1.8610638565  
 H,0,-1.4094417968,-0.827594347,-1.4638824513

### Toluene / NO<sub>2</sub>+ / H<sub>2</sub>SO<sub>4</sub> TS M06-2X/6-311G\*/PCM 2.45\_367760

m062x/6-311G\*

E(RM062X) = -1176.50395742

Zero-point correction= 0.182287 (Hartree/Particle)  
 Thermal correction to Energy= 0.198322  
 Thermal correction to Enthalpy= 0.199266  
 Thermal correction to Gibbs Free Energy= 0.136197  
 Sum of electronic and ZPE= -1176.321671  
 Sum of electronic and thermal Energies= -1176.305636  
 Sum of electronic and thermal Enthalpies= -1176.304692  
 Sum of electronic and thermal Free Energies= -1176.367760

| E | CV | S |
|---|----|---|
|---|----|---|

KCal/Mol Cal/Mol-K Cal/Mol-K  
Total 124.449 56.110 132.739

C,0,1.3018632539,-0.1069590375,1.4253909544  
C,0,2.6765326666,-1.2914041261,-0.7101003457  
C,0,2.5402480382,0.4082640586,0.9802268409  
C,0,0.7899306157,-1.2501139068,0.8170435544  
C,0,3.2358003697,-0.1894686532,-0.0502400537  
C,0,1.4595871348,-1.8369861869,-0.2516315288  
C,0,0.5763580161,0.579145547,2.5439588056  
H,0,3.2072569701,-1.7642101539,-1.5288746884  
H,0,2.9484290807,1.2876651275,1.4678287269  
H,0,-0.1489287218,-1.6695924739,1.1595830508  
H,0,4.2004478892,0.1948891451,-0.3590435659  
H,0,1.0510268059,-2.7168743658,-0.7361209348  
N,0,1.0219510261,-0.0683699724,-2.0417445636  
O,0,0.7165186825,0.7836261389,-1.3725861015  
O,0,1.0637572662,-0.6655426202,-2.9994356031  
S,0,4.148870552,1.99399554,-2.6466277464  
O,0,3.9974626988,2.8449404637,-1.3223211578  
O,0,5.3228216402,1.2061194323,-2.4576513956  
O,0,4.5070294565,3.0636623857,-3.7494194082  
O,0,2.8798147884,1.3900457453,-2.9670260484  
H,0,3.735332728,3.4952550458,-4.1504675623  
H,0,3.1484705242,3.3088035421,-1.2381528913  
H,0,1.202554912,0.6115551911,3.4386927359  
H,0,0.3494423934,1.6127664785,2.2717516878  
H,0,-0.3555827874,0.072132655,2.7892442388

### Toluene / NO<sub>2</sub>+ / H<sub>2</sub>SO<sub>4</sub> TS M06-2X/6-311G\*/PCM 2.47\_367357

m062x/6-311G\*  
E(RM062X) = -1176.50600394

Zero-point correction= 0.182633 (Hartree/Particle)  
Thermal correction to Energy= 0.198369  
Thermal correction to Enthalpy= 0.199313  
Thermal correction to Gibbs Free Energy= 0.138647  
Sum of electronic and ZPE= -1176.323371  
Sum of electronic and thermal Energies= -1176.307635  
Sum of electronic and thermal Enthalpies= -1176.306691  
Sum of electronic and thermal Free Energies= -1176.367357

E CV S  
KCal/Mol Cal/Mol-K Cal/Mol-K  
Total 124.478 56.086 127.682

C,0,1.3857235316,-0.0896439679,1.4121306041  
C,0,2.5741746083,-1.3639937917,-0.7834142686  
C,0,2.6947737114,0.2198175953,1.0482161038  
C,0,0.697322221,-1.0892383588,0.690776014  
C,0,3.2856174939,-0.3944347943,-0.0484970196  
C,0,1.2879474076,-1.73930518,-0.3749502189  
C,0,0.7037855868,0.6369897831,2.5314591943  
H,0,3.0480409627,-1.8598240505,-1.6230042323  
H,0,3.2514587279,0.9577706327,1.6151789187  
H,0,-0.3146626896,-1.346351207,0.985513736  
H,0,4.293798451,-0.1273198392,-0.3449347164  
H,0,0.7516617918,-2.5093189952,-0.9156664195  
N,0,1.8885641938,0.7058700238,-1.9354796496

O,0,1.0043081385,1.0426100657,-1.327812362  
O,0,2.6065300236,0.6901853504,-2.805045064  
S,0,2.7671774618,3.5359844499,0.0790515572  
O,0,1.5320728637,3.2868712974,0.765419974  
O,0,3.9689188911,3.5112216628,1.1060336917  
O,0,2.789055606,5.0057215991,-0.4940969171  
O,0,3.1937973088,2.7002816633,-1.0057572645  
H,0,2.3055558986,5.6483112926,0.0499572861  
H,0,3.7530915684,3.8836898151,1.9764431761  
H,0,1.4245717382,1.1426673308,3.1737204569  
H,0,0.0354421802,1.3982199465,2.1189898056  
H,0,0.1025783227,-0.0445903241,3.1350656142

### Toluene / NO<sub>2</sub>+ / H<sub>2</sub>SO<sub>4</sub> TS M06-2X/6-311G\*/PCM 2.47\_367350

m062x/6-311G\*  
E(RM062X) = -1176.50600378

Zero-point correction= 0.182637 (Hartree/Particle)  
Thermal correction to Energy= 0.198371  
Thermal correction to Enthalpy= 0.199315  
Thermal correction to Gibbs Free Energy= 0.138654  
Sum of electronic and ZPE= -1176.323367  
Sum of electronic and thermal Energies= -1176.307633  
Sum of electronic and thermal Enthalpies= -1176.306689  
Sum of electronic and thermal Free Energies= -1176.367350

E CV S  
KCal/Mol Cal/Mol-K Cal/Mol-K  
Total 124.480 56.083 127.673

C,0,1.4474524532,0.0526059121,1.2664205643  
C,0,3.0173548927,-1.3601478601,-0.5765056695  
C,0,2.6056289584,0.6425367878,0.7442307153  
C,0,1.1156323839,-1.2700918483,0.9105323047  
C,0,3.3602682041,-0.0481276944,-0.1835099147  
C,0,1.9088146606,-1.9683702355,0.0091701533  
H,0,0.8406309888,0.5852658632,1.9898489187  
C,0,3.8226672434,-2.068266077,-1.6233964974  
H,0,2.88343263,1.6459103686,1.0424988425  
H,0,0.2370776088,-1.7385726389,1.339860437  
H,0,4.2349821926,0.419699491,-0.6229465824  
H,0,1.653263105,-2.989174062,-0.2526825842  
N,0,0.0411237165,0.4322830824,-0.7235611342  
O,0,0.7841485968,0.3634874091,-1.5648342864  
O,0,-0.9453861341,0.6536879006,-0.2239258657  
S,0,-0.3687972422,-2.6539249343,-2.4975862442  
O,0,0.8953987513,-2.3430040381,-3.1007167549  
O,0,-0.2938585462,-4.0630596153,-1.7848343151  
O,0,-1.4725296385,-2.8493403921,-3.6078676522  
O,0,-0.9604427631,-1.781463843,-1.5249590145  
H,0,-1.1348253288,-3.2227904718,-4.4380389815  
H,0,0.2525420091,-4.7148305226,-2.2534420646  
H,0,3.640456824,-3.1426064321,-1.6050326355  
H,0,3.5385905636,-1.7003483446,-2.6134574814  
H,0,4.8898188706,-1.8836658045,-1.4913102575

**Toluene / NO2+ / H2SO4 TS M06-2X/6-311G\*/PCM 3.27\_367301**

m062x/6-311G\*  
E(RM062X) = -1176.50416316

Zero-point correction= 0.182152 (Hartree/Particle)  
Thermal correction to Energy= 0.198172  
Thermal correction to Enthalpy= 0.199116  
Thermal correction to Gibbs Free Energy= 0.136862  
Sum of electronic and ZPE= -1176.322011  
Sum of electronic and thermal Energies= -1176.305991  
Sum of electronic and thermal Enthalpies= -1176.305047  
Sum of electronic and thermal Free Energies= -1176.367301

| E             | CV        | S         |
|---------------|-----------|-----------|
| KCal/Mol      | Cal/Mol-K | Cal/Mol-K |
| Total 124.355 | 56.279    | 131.025   |

C,0,1.175857137,-0.2923308959,1.2760808552  
C,0,3.256935894,-1.2148096919,-0.3444163068  
C,0,2.3045277143,0.5106309128,1.0189643123  
C,0,1.0744619331,-1.5395044254,0.6854132724  
C,0,3.3877698757,0.0356144552,0.2466906507  
C,0,2.110318251,-1.9859302586,-0.1392942137  
H,0,0.3868651978,0.0818033234,1.9172898212  
H,0,4.0529342979,-1.5970580393,-0.9734843541  
H,0,2.3860650659,1.4798176433,1.5011293721  
H,0,0.2014809117,-2.157980262,0.855528096  
C,0,4.6318567427,0.861640535,0.0887708816  
H,0,2.0294324334,-2.9531533282,-0.6218482658  
N,0,1.1556746024,1.2823394581,-0.9579864112  
O,0,1.0959763618,0.3884333165,-1.6381960628  
O,0,1.0217712819,-2.3620164829,-0.6573072695  
S,0,-2.2009761508,-0.089096922,0.130139374  
O,0,-2.2647895056,-1.2632359659,-0.9254370796  
O,0,-2.0326673396,-0.7238814542,1.3965676924  
O,0,-3.6610400283,0.5079189903,0.1287692369  
O,0,-1.2841925675,0.9197806311,-0.3384009061  
H,0,-3.8067828379,1.1895883052,-0.5467203775  
H,0,-2.1810032413,-0.9727228606,-1.8478667464  
H,0,5.2659721767,0.7464305379,0.9719282741  
H,0,5.2064790332,0.5490838709,-0.7824426008  
H,0,4.3991867606,1.9237026415,-0.0061642448

**Toluene / NO2+ / H2SO4 TS M06-2X/6-311G\*/PCM 3.08\_366987**

m062x/6-311G\*  
E(RM062X) = -1176.50525318

Zero-point correction= 0.182356 (Hartree/Particle)  
Thermal correction to Energy= 0.198117  
Thermal correction to Enthalpy= 0.199061  
Thermal correction to Gibbs Free Energy= 0.138266  
Sum of electronic and ZPE= -1176.322897  
Sum of electronic and thermal Energies= -1176.307136  
Sum of electronic and thermal Enthalpies= -1176.306192  
Sum of electronic and thermal Free Energies= -1176.366987

| E | CV | S |
|---|----|---|
|---|----|---|

| KCal/Mol      | Cal/Mol-K | Cal/Mol-K |
|---------------|-----------|-----------|
| Total 124.320 | 56.249    | 127.954   |

C,0,1.0642829031,-0.1910019511,0.8572016353  
C,0,3.312362018,-1.3397429729,-0.4452653805  
C,0,2.3328540429,0.3597195632,0.9946346116  
C,0,0.9003634367,-1.288223651,0.0220877017  
C,0,3.4413590385,-0.2130372422,0.3564197321  
C,0,2.0167178283,-1.8411163596,-0.6523836985  
H,0,0.2151280707,0.2396509746,1.3718170285  
C,0,4.5180385257,-1.9874264648,-1.0643686397  
H,0,2.4753463119,1.2374855904,1.6140559918  
H,0,-0.0784372606,-1.7322427133,-0.1209177675  
H,0,4.4223640161,0.2269759647,0.501958599  
H,0,1.8753577834,-2.710917876,-1.2863424187  
N,0,1.2054572961,-0.209110597,-2.2169007761  
O,0,1.7056266123,0.7569320164,-1.9226136285  
O,0,0.5864126765,-0.8750830344,-2.8915720119  
S,0,3.6253354799,-1.79851512,-4.414825598  
O,0,3.0852359611,-1.5563792946,-5.8775366202  
O,0,4.9767125332,-2.2706116045,-4.4592989501  
O,0,2.6717417416,-2.9279296006,-3.8423650219  
O,0,3.2546458484,-0.6295941973,-3.6716464133  
H,0,2.905026295,-3.8304408853,-4.113720406  
H,0,3.4796541128,-2.1409146914,-6.5453541589  
H,0,4.2434113916,-2.85559267,-1.6628975712  
H,0,5.0602228877,-1.2814407428,-1.6959818175  
H,0,5.2032574492,-2.3219254406,-0.2827334214

**Toluene / NO2+ / H2SO4 TS M06-2X/6-311G\*/PCM 3.32\_366879**

m062x/6-311G\*  
E(RM062X) = -1176.50595018

Zero-point correction= 0.182866 (Hartree/Particle)  
Thermal correction to Energy= 0.198662  
Thermal correction to Enthalpy= 0.199606  
Thermal correction to Gibbs Free Energy= 0.139072  
Sum of electronic and ZPE= -1176.323084  
Sum of electronic and thermal Energies= -1176.307288  
Sum of electronic and thermal Enthalpies= -1176.306344  
Sum of electronic and thermal Free Energies= -1176.366879

| E             | CV        | S         |
|---------------|-----------|-----------|
| KCal/Mol      | Cal/Mol-K | Cal/Mol-K |
| Total 124.662 | 56.151    | 127.406   |

C,0,1.1085620742,-0.2488348089,1.4023740487  
C,0,3.1518427109,-1.2621083817,-0.2211803818  
C,0,2.2033713882,0.5522548538,1.035904418  
C,0,1.0153069306,-1.5368531384,0.9118139198  
C,0,3.2665485885,0.0412639094,0.2570190922  
C,0,2.0344528622,-2.0332234456,0.0874544274  
H,0,0.3330840962,0.1599431148,2.038057263  
H,0,3.9363028428,-1.6759184144,-0.8448183478  
H,0,2.2770467127,1.5621893031,1.4274695401  
H,0,0.1594390989,-2.1548347827,1.1527430666  
C,0,4.481179254,0.8812240417,-0.0142754834  
H,0,1.9556904546,-3.038829345,-0.3095784124  
N,0,1.1332783534,1.1215136362,-1.0731729833

O,0,0.8970020257,0.139817299,-1.5657765739  
 O,0,1.1683828642,2.2438212077,-0.9588502661  
 S,0,-2.2148626553,0.0774294377,-0.0469725995  
 O,0,-1.6230199757,-1.1007051158,-0.9204570525  
 O,0,-2.0728862925,-0.4571432735,1.43435924  
 O,0,-3.5960679673,0.2832914669,-0.362753197  
 O,0,-1.2440237344,1.1278694997,-0.1538942252  
 H,0,-2.8142818676,-1.011637322,1.7270369958  
 H,0,-2.2561011444,-1.8085786006,-1.1218277369  
 H,0,4.9811131079,0.5747973144,-0.9326455636  
 H,0,4.2292610817,1.9408705657,-0.0850058499  
 H,0,5.1925601907,0.7736009782,0.8092736615

### Toluene / NO<sub>2</sub>+ / H<sub>2</sub>SO<sub>4</sub> TS M06-2X/6-311G\*/PCM 3.34\_366676

m062x/6-311G\*  
 E(RM062X) = -1176.50534938

Zero-point correction= 0.182861 (Hartree/Particle)  
 Thermal correction to Energy= 0.198602  
 Thermal correction to Enthalpy= 0.199546  
 Thermal correction to Gibbs Free Energy= 0.138674  
 Sum of electronic and ZPE= -1176.322488  
 Sum of electronic and thermal Energies= -1176.306747  
 Sum of electronic and thermal Enthalpies= -1176.305803  
 Sum of electronic and thermal Free Energies= -1176.366676

| E        | CV        | S         |
|----------|-----------|-----------|
| KCal/Mol | Cal/Mol-K | Cal/Mol-K |
| Total    | 124.625   | 55.982    |
|          | 128.117   |           |

C,0,1.2020189926,-0.3673889648,1.4445043513  
 C,0,3.1585399948,-1.2360862468,-0.3601711874  
 C,0,2.26455754,0.4742110407,1.0731457544  
 C,0,1.0951041214,-1.6195117654,0.8717464693  
 C,0,3.2870068187,0.0328136834,0.2021402096  
 C,0,2.0703576489,-2.0428199142,-0.0434254925  
 H,0,0.4631383183,-0.016510661,2.1545421113  
 H,0,3.910654614,-1.5938269046,-1.0542468703  
 H,0,2.3511420177,1.454272931,1.5318961228  
 H,0,0.2676986108,-2.2701471364,1.1274396267  
 C,0,4.4773181402,0.9041556419,-0.0765072292  
 H,0,1.9797550588,-3.0201301588,-0.5033758659  
 N,0,1.1061104328,1.190204373,-0.9362821885  
 O,0,0.8314569505,0.2454508869,-1.4799422906  
 O,0,1.1565987743,2.30268679,-0.7519469964  
 S,0,-2.0732472153,-0.0054145773,0.2829611131  
 O,0,-1.7304138191,-0.9318312735,-0.9536344531  
 O,0,-2.0681113214,-0.7837351706,1.4874049614  
 O,0,-3.529525979,0.5153984,-0.0226902064  
 O,0,-1.2221185471,1.138059927,0.1195889867  
 H,0,-4.2330820096,-0.0832787572,0.2763865461  
 H,0,-2.0638120255,-1.8404782009,-0.8769143972  
 H,0,5.2432340778,0.729554188,0.6842819888  
 H,0,4.9140514588,0.6835663236,-1.0501125788  
 H,0,4.2191583465,1.9637235459,-0.0352834852

### Toluene / NO<sub>2</sub>+ / H<sub>2</sub>SO<sub>4</sub> TS M06-2X/6-311G\*/PCM 2.48\_366653

m062x/6-311G\*  
 E(RM062X) = -1176.50596937

Zero-point correction= 0.182740 (Hartree/Particle)  
 Thermal correction to Energy= 0.198294  
 Thermal correction to Enthalpy= 0.199238  
 Thermal correction to Gibbs Free Energy= 0.139316  
 Sum of electronic and ZPE= -1176.323229  
 Sum of electronic and thermal Energies= -1176.307675  
 Sum of electronic and thermal Enthalpies= -1176.306731  
 Sum of electronic and thermal Free Energies= -1176.366653

| E        | CV        | S         |
|----------|-----------|-----------|
| KCal/Mol | Cal/Mol-K | Cal/Mol-K |
| Total    | 124.431   | 56.006    |
|          | 126.117   |           |

C,0,1.3522633047,-0.0195415153,1.3283820503  
 C,0,2.4465352315,-1.3946200832,-0.8624728545  
 C,0,2.6886480109,0.1607868421,0.9927535471  
 C,0,0.5779885775,-0.9257374524,0.5677011814  
 C,0,3.2326213324,-0.4995628256,-0.1077459176  
 C,0,1.1184970249,-1.6270947558,-0.4925057853  
 C,0,0.7170283771,0.7207420242,2.4669605349  
 H,0,2.8874005657,-1.9293940893,-1.6958976955  
 H,0,3.3126272491,0.8287991863,1.5762639826  
 H,0,-0.4635497268,-1.072192888,0.8344470906  
 H,0,4.2704265838,-0.3390381104,-0.3784169579  
 H,0,0.5120370379,-2.3258858961,-1.0550534411  
 N,0,2.1282205238,0.8182392138,-1.9410543308  
 O,0,1.172726589,1.1578002875,-1.452108971  
 O,0,2.9568936909,0.8271231435,-2.7078839766  
 S,0,2.6765281212,3.5683213891,0.2757722734  
 O,0,1.3493821715,3.2781854802,0.7367785152  
 O,0,3.6990798786,3.4652551397,1.4774410502  
 O,0,2.7784027408,5.0759025011,-0.1790232758  
 O,0,3.2766438857,2.8091451153,-0.7830626331  
 H,0,2.2087833678,5.6777477228,0.3272618995  
 H,0,3.3415503177,3.7648404766,2.3288265743  
 H,0,0.2213406114,0.0248487074,3.1471720193  
 H,0,1.450913145,1.3000518674,3.0259121401  
 H,0,-0.0401606122,1.4105025191,2.0870439805

### Toluene / NO<sub>2</sub>+ / H<sub>2</sub>SO<sub>4</sub> TS M06-2X/6-311G\*/PCM 3.33\_365619

m062x/6-311G\*  
 E(RM062X) = -1176.50419780

Zero-point correction= 0.182762 (Hartree/Particle)  
 Thermal correction to Energy= 0.198553  
 Thermal correction to Enthalpy= 0.199497  
 Thermal correction to Gibbs Free Energy= 0.138579  
 Sum of electronic and ZPE= -1176.321436  
 Sum of electronic and thermal Energies= -1176.305645  
 Sum of electronic and thermal Enthalpies= -1176.304701  
 Sum of electronic and thermal Free Energies= -1176.365619

| E | CV | S |
|---|----|---|
|---|----|---|

KCal/Mol Cal/Mol-K Cal/Mol-K  
Total 124.594 56.096 128.212

C,0,1.207224956,-0.4414402954,1.4662233836  
C,0,3.1390746344,-1.2098816994,-0.4068561848  
C,0,2.2535196544,0.4273434969,1.1132931721  
C,0,1.1008799143,-1.6684487104,0.8412656855  
C,0,3.2630487115,0.0365642126,0.2048673644  
C,0,2.0645751596,-2.0414336336,-0.1070874676  
H,0,0.4816607619,-0.1284310852,2.2066565655  
H,0,3.8828303524,-1.5295296314,-1.1280714383  
H,0,2.3364385553,1.3890684717,1.6100946494  
H,0,0.2788376174,-2.3344208354,1.0735586102  
C,0,4.4358107554,0.935824575,-0.0595665661  
H,0,1.9755206664,-2.9985959642,-0.607843994  
N,0,1.033508995,1.2009461916,-0.8525691503  
O,0,0.7716523901,0.2700879486,-1.4253578422  
O,0,1.0630472585,2.3043282633,-0.6205457089  
S,0,-2.0950696249,-0.1538776196,0.1582897852  
O,0,-1.764951982,-1.2195628577,-0.7306416733  
O,0,-2.1323776797,-0.805157671,1.598485605  
O,0,-3.5998150515,0.2256134325,-0.1242503018  
O,0,-1.3031846286,1.052108745,0.2017037211  
H,0,-3.8500033037,1.1107615924,0.187772152  
H,0,-2.2903920892,-0.1765345613,2.3218731849  
H,0,5.217330656,0.7447626661,0.6810955425  
H,0,4.8589540773,0.759655083,-1.0481053643  
H,0,4.1622962435,1.9888918858,0.0264342703

## Nitrations of Benzene Including a Sulfuric Acid Molecule

An exploratory series of calculations was performed to evaluate the system of main text reference 23. This system includes an explicit molecule of sulfuric acid, in addition to benzene and  $\text{NO}_2^+$ . Some studies used water as the implicit solvent, while others, as marked, used  $\epsilon=109$  following reference 6a's implicit solvent model. These calculations used M06-2X/6-311++G\*\* to match reference 23.

### Optimized TS for the nitration of benzene / $\text{H}_2\text{SO}_4$ in water

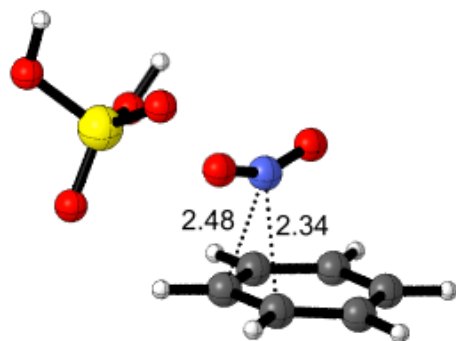

scrf=(solvent=water)  
m062x/6-311++G\*\*  
E(RM062X) = -1137.22862808

Zero-point correction= 0.153518 (Hartree/Particle)  
Thermal correction to Energy= 0.167849  
Thermal correction to Enthalpy= 0.168793  
Thermal correction to Gibbs Free Energy= 0.109978  
Sum of electronic and ZPE= -1137.075110  
Sum of electronic and thermal Energies= -1137.060779  
Sum of electronic and thermal Enthalpies= -1137.059835  
Sum of electronic and thermal Free Energies= -1137.118650

E CV S  
KCal/Mol Cal/Mol-K Cal/Mol-K  
Total 105.327 50.407 123.788

C,0,1.2433883745,-0.2428223357,1.1741211346  
C,0,3.2943184877,-1.1350187881,-0.49811605  
C,0,2.4466176734,0.4942952656,1.0452095581  
C,0,1.0755898379,-1.4243688504,0.4586013985  
C,0,3.4906760392,0.0142088326,0.2390290224  
C,0,2.0844538117,-1.8496470019,-0.392629401  
H,0,0.4608506769,0.1151282607,1.8337410466  
H,0,4.0711679665,-1.499049796,-1.1587907331  
H,0,2.5853451564,1.3932714356,1.6345974174  
H,0,0.1603458322,-1.9953723859,0.555020991  
H,0,4.4197906862,0.5654986479,0.1748355994  
H,0,1.9498081449,-2.7498970189,-0.9801122743  
N,0,1.1228535636,1.4545719814,-0.6344400695  
O,0,1.2655007808,0.8176657575,-1.559305763  
O,0,0.75964207,2.3989157682,-0.116817001  
S,0,-2.2531235255,-0.1416098159,0.1329334456  
O,0,-2.5308283627,-1.5123349896,-0.6079892351  
O,0,-1.9476169669,-0.4902553231,1.4849294104  
O,0,-3.6671070702,0.5625482192,0.1677795461  
O,0,-1.3451991631,0.6484907141,-0.6615341492  
H,0,-3.8703163879,1.0342564115,-0.6573255767  
H,0,-2.5559936257,-1.4161329885,-1.5745903172

### Optimized TS for the nitration of benzene / $\text{H}_2\text{SO}_4$ with $\epsilon=109$

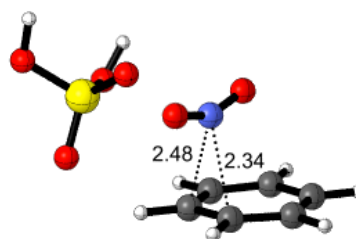

Scrf=(solvent=generic=read)  
eps=109  
epsinf=2.016  
rsolv=2.5  
m062x/6-311++G\*\*  
E(RM062X) = -1137.22898495

Zero-point correction= 0.153524 (Hartree/Particle)  
Thermal correction to Energy= 0.167855  
Thermal correction to Enthalpy= 0.168799  
Thermal correction to Gibbs Free Energy= 0.109969  
Sum of electronic and ZPE= -1137.075461  
Sum of electronic and thermal Energies= -1137.061130

Sum of electronic and thermal Enthalpies= -1137.060186  
 Sum of electronic and thermal Free Energies= -1137.119016

| E             | CV        | S         |
|---------------|-----------|-----------|
| KCal/Mol      | Cal/Mol-K | Cal/Mol-K |
| Total 105.331 | 50.401    | 123.819   |

C,0,1.242229262,-0.2448802291,1.1737812552  
 C,0,3.2950184823,-1.1345787946,-0.4977707368  
 C,0,2.444681072,0.493686734,1.0452197534  
 C,0,1.0757760891,-1.4260757829,0.4576120736  
 C,0,3.4899217265,0.0145488139,0.2397514058  
 C,0,2.0855476353,-1.8500807307,-0.393303153  
 H,0,0.45915009,0.1123503552,1.8331059991  
 H,0,4.072528475,-1.4978054547,-1.1580908063  
 H,0,2.5822941935,1.3925330657,1.6350247473  
 H,0,0.1609428559,-1.9978938175,0.5530424584  
 H,0,4.4184997629,0.5668119345,0.1762523485  
 H,0,1.951860377,-2.7500742962,-0.9813959988  
 N,0,1.1248023446,1.4540022475,-0.6340665089  
 O,0,1.2656724531,0.8166855998,-1.5590530862  
 O,0,0.7623867002,2.3993057846,-0.1173646692  
 S,0,-2.2535307302,-0.1414817273,0.133387552  
 O,0,-2.5324499553,-1.5105811573,-0.6099975757  
 O,0,-1.9493717504,-0.4929767513,1.4850282739  
 O,0,-3.6667661412,0.5642251148,0.1687845505  
 O,0,-1.3442351656,0.6489954291,-0.6590153533  
 H,0,-3.8686273514,1.0383106443,-0.6553063893  
 H,0,-2.5561664256,-1.4126849816,-1.5764781407

### TS for the nitration of benzene / H<sub>2</sub>SO<sub>4</sub> in water

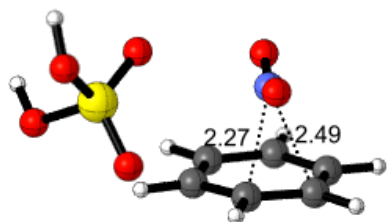

scrf=(solvent=water)  
 m062x/6-311++G\*\*  
 E(RM062X) = -1137.22726102

Zero-point correction= 0.154049 (Hartree/Particle)  
 Thermal correction to Energy= 0.166019  
 Thermal correction to Enthalpy= 0.166963  
 Thermal correction to Gibbs Free Energy= 0.114796  
 Sum of electronic and zero-point Energies= -1137.073212  
 Sum of electronic and thermal Energies= -1137.061242  
 Sum of electronic and thermal Enthalpies= -1137.060298  
 Sum of electronic and thermal Free Energies= -1137.112465

| E             | CV        | S         |
|---------------|-----------|-----------|
| KCal/Mol      | Cal/Mol-K | Cal/Mol-K |
| Total 104.179 | 44.476    | 109.795   |

C,0,1.3808052492,-0.1790984205,1.2150657253  
 C,0,3.2485195488,-1.1046086776,-0.5984768334  
 C,0,2.6600428452,0.4238640053,1.1419762024

C,0,1.0813986765,-1.3063225731,0.4319121017  
 C,0,3.5902400313,-0.0471016994,0.2309442152  
 C,0,2.0014636881,-1.7434294623,-0.4902389748  
 H,0,0.6649692357,0.1701832907,1.9463477573  
 H,0,3.9581589183,-1.4563187812,-1.3349639493  
 H,0,2.8919539507,1.2578040922,1.7907612374  
 H,0,0.124883694,-1.7976488336,0.5427540226  
 H,0,4.562211449,0.4173184686,0.1530787729  
 H,0,1.7737778722,-2.5807993605,-1.1342095695  
 N,0,0.921870416,1.4081211505,-0.3438201047  
 O,0,1.2999043668,1.0488741651,-1.349674275  
 O,0,0.3454188767,2.1660555624,0.2810778143  
 S,0,-2.245054708,-0.0880996204,-0.0392357781  
 O,0,-2.5956427662,-1.5966039417,-0.2591598342  
 O,0,-1.7988912621,0.0159803287,1.3056628391  
 O,0,-3.6278408463,0.6344200468,-0.1015994545  
 O,0,-1.4174556668,0.364476163,-1.1158316087  
 H,0,-3.8800348189,0.8515530891,-1.0127155056  
 H,0,-2.6805347504,-1.8162769919,-1.2005068005

### TS for the nitration of benzene / H<sub>2</sub>SO<sub>4</sub> with eps=109

Scrf=(solvent=generic=read)  
 eps=109  
 epsinf=2.016  
 rsolv=2.5  
 m062x/6-311++G\*\*  
 E(RM062X) = -1137.22760470

Zero-point correction= 0.154042 (Hartree/Particle)  
 Thermal correction to Energy= 0.166015  
 Thermal correction to Enthalpy= 0.166960  
 Thermal correction to Gibbs Free Energy= 0.114783  
 Sum of electronic and zero-point Energies= -1137.073563  
 Sum of electronic and thermal Energies= -1137.061589  
 Sum of electronic and thermal Enthalpies= -1137.060645  
 Sum of electronic and thermal Free Energies= -1137.112821

| E             | CV        | S         |
|---------------|-----------|-----------|
| KCal/Mol      | Cal/Mol-K | Cal/Mol-K |
| Total 104.176 | 44.478    | 109.814   |

C,0,1.3808052492,-0.1790984205,1.2150657253  
 C,0,3.2485195488,-1.1046086776,-0.5984768334  
 C,0,2.6600428452,0.4238640053,1.1419762024  
 C,0,1.0813986765,-1.3063225731,0.4319121017  
 C,0,3.5902400313,-0.0471016994,0.2309442152  
 C,0,2.0014636881,-1.7434294623,-0.4902389748  
 H,0,0.6649692357,0.1701832907,1.9463477573  
 H,0,3.9581589183,-1.4563187812,-1.3349639493  
 H,0,2.8919539507,1.2578040922,1.7907612374  
 H,0,0.124883694,-1.7976488336,0.5427540226  
 H,0,4.562211449,0.4173184686,0.1530787729  
 H,0,1.7737778722,-2.5807993605,-1.1342095695  
 N,0,0.921870416,1.4081211505,-0.3438201047  
 O,0,1.2999043668,1.0488741651,-1.349674275  
 O,0,0.3454188767,2.1660555624,0.2810778143  
 S,0,-2.245054708,-0.0880996204,-0.0392357781  
 O,0,-2.5956427662,-1.5966039417,-0.2591598342  
 O,0,-1.7988912621,0.0159803287,1.3056628391



O,0,-3.6278408463,0.6344200468,-0.1015994545  
 O,0,-1.4174556668,0.364476163,-1.1158316087  
 H,0,-3.8800348189,0.8515530891,-1.0127155056  
 H,0,-2.6805347504,-1.8162769919,-1.2005068005

### $\pi$ -complex for the nitration of benzene / H<sub>2</sub>SO<sub>4</sub> in water

scrf=(solvent=water)  
 m062x/6-311++G\*\*  
 E(RM062X) = -1137.23415202

Zero-point correction= 0.155069 (Hartree/Particle)  
 Thermal correction to Energy= 0.170106  
 Thermal correction to Enthalpy= 0.171051  
 Thermal correction to Gibbs Free Energy= 0.110779  
 Sum of electronic and ZPE= -1137.079083  
 Sum of electronic and thermal Energies= -1137.064046  
 Sum of electronic and thermal Enthalpies= -1137.063101  
 Sum of electronic and thermal Free Energies= -1137.123373

| E             | CV        | S         |
|---------------|-----------|-----------|
| KCal/Mol      | Cal/Mol-K | Cal/Mol-K |
| Total 106.743 | 51.966    | 126.852   |

C,0,-0.9484656687,-0.0958313958,1.415685958  
 C,0,-2.4985233005,0.9219691104,-0.6665822876  
 C,0,-2.1695753588,-0.6947296552,1.0962301636  
 C,0,-0.5104501523,1.01695238,0.6984043148  
 C,0,-2.9449086834,-0.182758343,0.0560612586  
 C,0,-1.281345557,1.5214935754,-0.346147518  
 H,0,-0.3459424069,-0.4857560768,2.2287996837  
 H,0,-3.0985052251,1.315955275,-1.4783130989  
 H,0,-2.5195391988,-1.5492474998,1.6643745114  
 H,0,0.425828332,1.4952381555,0.9615944067  
 H,0,-3.8936702599,-0.6448707343,-0.1893621263  
 H,0,-0.9358962077,2.3820712125,-0.9068075186  
 N,0,-0.2127135319,-1.9998584634,-0.8229670052  
 O,0,-0.5938534734,-1.3214462013,-1.6078150001  
 O,0,0.1556999359,-2.7231636999,-0.0702641559  
 S,0,2.775474817,-0.0625828872,0.087093629  
 O,0,2.7911920658,1.4877746247,-0.2261532251  
 O,0,2.6008747025,-0.1816026979,1.4982360877  
 O,0,4.2527268263,-0.5261252244,-0.2174217048  
 O,0,1.8760197432,-0.7113554716,-0.8399859564  
 H,0,4.4244555654,-0.6450780745,-1.1667535342  
 H,0,2.6511170367,1.6829520913,-1.1679068827

### $\pi$ -complex for the nitration of benzene / H<sub>2</sub>SO<sub>4</sub> with eps=109

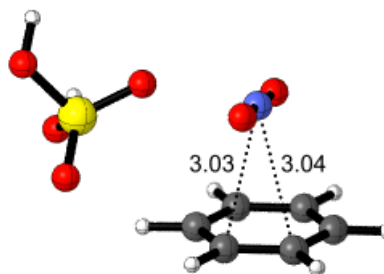

Scrf=(solvent=generic=read)  
 eps=109  
 epsinf=2.016  
 rsolv=2.5  
 m062x/6-311++G\*\*  
 E(RM062X) = -1137.23458220

Zero-point correction= 0.155119 (Hartree/Particle)  
 Thermal correction to Energy= 0.170140  
 Thermal correction to Enthalpy= 0.171085  
 Thermal correction to Gibbs Free Energy= 0.110960  
 Sum of electronic and ZPE= -1137.079463  
 Sum of electronic and thermal Energies= -1137.064442  
 Sum of electronic and thermal Enthalpies= -1137.063498  
 Sum of electronic and thermal Free Energies= -1137.123622

| E             | CV        | S         |
|---------------|-----------|-----------|
| KCal/Mol      | Cal/Mol-K | Cal/Mol-K |
| Total 106.765 | 51.962    | 126.543   |

C,0,-0.9495407485,-0.0982248932,1.4167261157  
 C,0,-2.496323829,0.9220697864,-0.6670537172  
 C,0,-2.1717932407,-0.6945188796,1.0969163102  
 C,0,-0.5084864255,1.0127317903,0.6986735394  
 C,0,-2.9454397792,-0.1813297013,0.0561186405  
 C,0,-1.2776613332,1.5186299609,-0.3466770122  
 H,0,-0.3480548955,-0.4893785751,2.2299728952  
 H,0,-3.0949533001,1.3168006123,-1.4793926484  
 H,0,-2.5236470391,-1.5483022815,1.664904813  
 H,0,0.4294069547,1.4882867817,0.9608188285  
 H,0,-3.8948843515,-0.6418544685,-0.189601185  
 H,0,-0.9293205909,2.3775322051,-0.9081277399  
 N,0,-0.2097875277,-1.9999551707,-0.8195094553  
 O,0,-0.5969115274,-1.3261797078,-1.6053247294  
 O,0,0.1650186105,-2.7190308474,-0.0659426744  
 S,0,2.7725626398,-0.0589612752,0.0854612185  
 O,0,2.7933954028,1.4926596087,-0.2245519727  
 O,0,2.5935365545,-0.1820676821,1.4955723955  
 O,0,4.2496720714,-0.5250306049,-0.2187218175  
 O,0,1.8744260969,-0.7027825209,-0.8459105766  
 H,0,4.4173338872,-0.649264124,-1.1683038917  
 H,0,2.6514523708,1.6881699872,-1.1660473365

### $\pi$ -complex for the nitration of benzene / H<sub>2</sub>SO<sub>4</sub> in water

scrf=(solvent=water)  
 m062x/6-311++G\*\*

E(RM062X) = -1137.23314059

Zero-point correction= 0.154885 (Hartree/Particle)  
 Thermal correction to Energy= 0.167843  
 Thermal correction to Enthalpy= 0.168787  
 Thermal correction to Gibbs Free Energy= 0.113564  
 Sum of electronic and zero-point Energies= -1137.078256  
 Sum of electronic and thermal Energies= -1137.065298  
 Sum of electronic and thermal Enthalpies= -1137.064354  
 Sum of electronic and thermal Free Energies= -1137.119577

| E             | CV        | S         |
|---------------|-----------|-----------|
| KCal/Mol      | Cal/Mol-K | Cal/Mol-K |
| Total 105.323 | 46.356    | 116.227   |

C,0,-0.955283465,-0.1057099629,1.4039216634  
 C,0,-2.5178520175,0.9239144691,-0.6538848587  
 C,0,-2.1778167772,-0.6984036471,1.0937760304  
 C,0,-0.5199107666,1.0047153947,0.6879183645  
 C,0,-2.9590374425,-0.1810349314,0.0652762617  
 C,0,-1.2988121343,1.5167889802,-0.3428557623  
 H,0,-0.3457120177,-0.5031311685,2.2053269232  
 H,0,-3.1228766812,1.3224303173,-1.4569336746  
 H,0,-2.5224918833,-1.5551757486,1.6577815543  
 H,0,0.4209498772,1.474138041,0.9417801135  
 H,0,-3.9088872364,-0.639404964,-0.1740938968  
 H,0,-0.9561746404,2.376475848,-0.9027405283  
 N,0,-0.2040249944,-1.982195065,-0.8134908081  
 O,0,-0.5996272496,-1.3185179382,-1.6012947585  
 O,0,0.1823263949,-2.6813476205,-0.0495564516  
 S,0,2.7920359765,-0.0471988992,0.0719566357  
 O,0,2.8311427958,1.4864442527,-0.2298308349  
 O,0,2.5720152855,-0.1736158788,1.4667059658  
 O,0,4.2558148627,-0.5211441686,-0.1903436684  
 O,0,1.9207494966,-0.6787835571,-0.8767275061  
 H,0,4.4201903288,-0.692903265,-1.1310814612  
 H,0,2.6932822885,1.6736595121,-1.1716093031

**$\pi$ -complex for the nitration of benzene / H<sub>2</sub>SO<sub>4</sub>  
 with eps=109**

Scrf=(solvent=generic=read)

eps=109  
 epsinf=2.016  
 rsolv=2.5  
 m062x/6-311++G\*\*

Zero-point correction= 0.154875 (Hartree/Particle)  
 Thermal correction to Energy= 0.167837  
 Thermal correction to Enthalpy= 0.168781  
 Thermal correction to Gibbs Free Energy= 0.113547  
 Sum of electronic and zero-point Energies= -1137.078694  
 Sum of electronic and thermal Energies= -1137.065732  
 Sum of electronic and thermal Enthalpies= -1137.064788  
 Sum of electronic and thermal Free Energies= -1137.120022

| E             | CV        | S         |
|---------------|-----------|-----------|
| KCal/Mol      | Cal/Mol-K | Cal/Mol-K |
| Total 105.319 | 46.361    | 116.251   |

C,0,-0.955283465,-0.1057099629,1.4039216634  
 C,0,-2.5178520175,0.9239144691,-0.6538848587  
 C,0,-2.1778167772,-0.6984036471,1.0937760304  
 C,0,-0.5199107666,1.0047153947,0.6879183645  
 C,0,-2.9590374425,-0.1810349314,0.0652762617  
 C,0,-1.2988121343,1.5167889802,-0.3428557623  
 H,0,-0.3457120177,-0.5031311685,2.2053269232  
 H,0,-3.1228766812,1.3224303173,-1.4569336746  
 H,0,-2.5224918833,-1.5551757486,1.6577815543  
 H,0,0.4209498772,1.474138041,0.9417801135  
 H,0,-3.9088872364,-0.639404964,-0.1740938968  
 H,0,-0.9561746404,2.376475848,-0.9027405283  
 N,0,-0.2040249944,-1.982195065,-0.8134908081  
 O,0,-0.5996272496,-1.3185179382,-1.6012947585  
 O,0,0.1823263949,-2.6813476205,-0.0495564516  
 S,0,2.7920359765,-0.0471988992,0.0719566357  
 O,0,2.8311427958,1.4864442527,-0.2298308349  
 O,0,2.5720152855,-0.1736158788,1.4667059658  
 O,0,4.2558148627,-0.5211441686,-0.1903436684  
 O,0,1.9207494966,-0.6787835571,-0.8767275061  
 H,0,4.4201903288,-0.692903265,-1.1310814612  
 H,0,2.6932822885,1.6736595121,-1.1716093031

## References

---

1. Gaussian 09, Revision A.02, Frisch, M. J.; Trucks, G. W.; Schlegel, H. B.; Scuseria, G. E.; Robb, M. A.; Cheeseman, J. R.; Scalmani, G.; Barone, V.; Mennucci, B.; Petersson, G. A.; Nakatsuji, H.; Caricato, M.; Li, X.; Hratchian, H. P.; Izmaylov, A. F.; Bloino, J.; Zheng, G.; Sonnenberg, J. L.; Hada, M.; Ehara, M.; Toyota, K.; Fukuda, R.; Hasegawa, J.; Ishida, M.; Nakajima, T.; Honda, Y.; Kitao, O.; Nakai, H.; Vreven, T.; Montgomery, Jr., J. A.; Peralta, J. E.; Ogliaro, F.; Bearpark, M.; Heyd, J. J.; Brothers, E.; Kudin, K. N.; Staroverov, V. N.; Kobayashi, R.; Normand, J.; Raghavachari, K.; Rendell, A.; Burant, J. C.; Iyengar, S. S.; Tomasi, J.; Cossi, M.; Rega, N.; Millam, N. J.; Klene, M.; Knox, J. E.; Cross, J. B.; Bakken, V.; Adamo, C.; Jaramillo, J.; Gomperts, R.; Stratmann, R. E.; Yazyev, O.; Austin, A. J.; Cammi, R.; Pomelli, C.; Ochterski, J. W.; Martin, R. L.; Morokuma, K.; Zakrzewski, V. G.; Voth, G. A.; Salvador, P.; Dannenberg, J. J.; Dapprich, S.; Daniels, A. D.; Farkas, Ö.; Foresman, J. B.; Ortiz, J. V.; Cioslowski, J.; Fox, D. J. Gaussian, Inc., Wallingford CT, 2009.
2. Gaussian 09, Revision B.01, Frisch, M. J.; Trucks, G. W.; Schlegel, H. B.; Scuseria, G. E.; Robb, M. A.; Cheeseman, J. R.; Scalmani, G.; Barone, V.; Mennucci, B.; Petersson, G. A.; Nakatsuji, H.; Caricato, M.; Li, X.; Hratchian, H. P.; Izmaylov, A. F.; Bloino, J.; Zheng, G.; Sonnenberg, J. L.; Hada, M.; Ehara, M.; Toyota, K.; Fukuda, R.; Hasegawa, J.; Ishida, M.; Nakajima, T.; Honda, Y.; Kitao, O.; Nakai, H.; Vreven, T.; Montgomery, Jr., J. A.; Peralta, J. E.; Ogliaro, F.; Bearpark, M.; Heyd, J. J.; Brothers, E.; Kudin, K. N.; Staroverov, V. N.; Kobayashi, R.; Normand, J.; Raghavachari, K.; Rendell, A.; Burant, J. C.; Iyengar, S. S.; Tomasi, J.; Cossi, M.; Rega, N.; Millam, N. J.; Klene, M.; Knox, J. E.; Cross, J. B.; Bakken, V.; Adamo, C.; Jaramillo, J.; Gomperts, R.; Stratmann, R. E.; Yazyev, O.; Austin, A. J.; Cammi, R.; Pomelli, C.; Ochterski, J. W.; Martin, R. L.; Morokuma, K.; Zakrzewski, V. G.; Voth, G. A.; Salvador, P.; Dannenberg, J. J.; Dapprich, S.; Daniels, A. D.; Farkas, Ö.; Foresman, J. B.; Ortiz, J. V.; Cioslowski, J.; Fox, D. J. Gaussian, Inc., Wallingford CT, 2009.
3. Gaussian 09, Revision D.01, Frisch, M. J.; Trucks, G. W.; Schlegel, H. B.; Scuseria, G. E.; Robb, M. A.; Cheeseman, J. R.; Scalmani, G.; Barone, V.; Mennucci, B.; Petersson, G. A.; Nakatsuji, H.; Caricato, M.; Li, X.; Hratchian, H. P.; Izmaylov, A. F.; Bloino, J.; Zheng, G.; Sonnenberg, J. L.; Hada, M.; Ehara, M.; Toyota, K.; Fukuda, R.; Hasegawa, J.; Ishida, M.; Nakajima, T.; Honda, Y.; Kitao, O.; Nakai, H.; Vreven, T.; Montgomery, J. A., Jr.; Peralta, J. E.; Ogliaro, F.; Bearpark, M.; Heyd, J. J.; Brothers, E.; Kudin, K. N.; Staroverov, V. N.; Kobayashi, R.; Normand, J.; Raghavachari, K.; Rendell, A.; Burant, J. C.; Iyengar, S. S.; Tomasi, J.; Cossi, M.; Rega, N.; Millam, N. J.; Klene, M.; Knox, J. E.; Cross, J. B.; Bakken, V.; Adamo, C.; Jaramillo, J.; Gomperts, R.; Stratmann, R. E.; Yazyev, O.; Austin, A. J.; Cammi, R.; Pomelli, C.; Ochterski, J. W.; Martin, R. L.; Morokuma, K.; Zakrzewski, V. G.; Voth, G. A.; Salvador, P.; Dannenberg, J. J.; Dapprich, S.; Daniels, A. D.; Farkas, Ö.; Foresman, J. B.; Ortiz, J. V.; Cioslowski, J.; Fox, D. J. Gaussian, Inc., Wallingford CT, 2009.
4. Singleton, D. A.; Hang, C.; Szymanski, M. J.; Greenwald, E. E. *J. Am. Chem. Soc.* **2003**, 125, 1176-1177.
5. Chapman, S.; Bunker, D.L. *J. Chem. Phys.* **1975**, 62, 2890-2899.
